# Supplementary material
Source: publisher figshare collection journal article supplement (https://gsapubs.figshare.com/ndownloader/files/31090780)
Supplement: Supplementary file 1 [file 31090780]

## Sheet: Monazite Geochron
DOI	UNIQUE ID	SAMPLE NAME	SPOT	TECTONIC SETTING	LOCATION	LOCATION COMMENT	ROCK TYPE	MET GRADE	ROCK NAME	NOTES	MNZ TYPE	METHOD		THO2(WT%)	UO2(WT%)	PbO(WT%)	Age	1s	2s		Age NOTES	TH(PPM)	U(PPM)	PB(PPM)	Pb206/U238 Ratio	1s	2s	Pb207/U235 Ratio	1s	2s	Pb207/Pb206 Ratio	1s	2s	rho(6/8 vs 7/5)	Pb208/Th232 Ratio	1s	2s		Pb206/U238 Age	1s	2s	Pb207/U235 Age	1s	2s	Pb207/Pb206 Age	1s	2s	Pb208/Th232 Age	1s
https://doi.org/10.1016/j.gr.2020.04.004	[0001]	dr4a_2_1		OROGEN	Austria	Bohemian Massif / Variscan Orogen	Metapelite	Granulite/Amphibolite	Metapelitic Gneiss		Metamorphic	EMPA					328		18			3.969	0.409	0.08
https://doi.org/10.1016/j.gr.2020.04.004	[0001]	dr4a_2_2		OROGEN	Austria	Bohemian Massif / Variscan Orogen	Metapelite	Granulite/Amphibolite	Metapelitic Gneiss		Metamorphic	EMPA					345		18			3.916	0.409	0.083
https://doi.org/10.1016/j.gr.2020.04.004	[0001]	dr4a_2_3		OROGEN	Austria	Bohemian Massif / Variscan Orogen	Metapelite	Granulite/Amphibolite	Metapelitic Gneiss		Metamorphic	EMPA					331		21			3.844	0.193	0.068
https://doi.org/10.1016/j.gr.2020.04.004	[0001]	dr4a_2_4		OROGEN	Austria	Bohemian Massif / Variscan Orogen	Metapelite	Granulite/Amphibolite	Metapelitic Gneiss		Metamorphic	EMPA					350		22			3.247	0.343	0.07
https://doi.org/10.1016/j.gr.2020.04.004	[0001]	dr4a_2_5		OROGEN	Austria	Bohemian Massif / Variscan Orogen	Metapelite	Granulite/Amphibolite	Metapelitic Gneiss		Metamorphic	EMPA					331		22			3.836	0.17	0.066
https://doi.org/10.1016/j.gr.2020.04.004	[0001]	dr4a_2_6		OROGEN	Austria	Bohemian Massif / Variscan Orogen	Metapelite	Granulite/Amphibolite	Metapelitic Gneiss		Metamorphic	EMPA					334		22			3.862	0.17	0.067
https://doi.org/10.1016/j.gr.2020.04.004	[0001]	dr4a_2_8		OROGEN	Austria	Bohemian Massif / Variscan Orogen	Metapelite	Granulite/Amphibolite	Metapelitic Gneiss		Metamorphic	EMPA					346		17			4.326	0.453	0.092
https://doi.org/10.1016/j.gr.2020.04.004	[0001]	dr4b_9_1		OROGEN	Austria	Bohemian Massif / Variscan Orogen	Metapelite	Granulite/Amphibolite	Metapelitic Gneiss		Metamorphic	EMPA					349		27			2.935	0.473	0.074
https://doi.org/10.1016/j.gr.2020.04.004	[0001]	dr4b_9_2		OROGEN	Austria	Bohemian Massif / Variscan Orogen	Metapelite	Granulite/Amphibolite	Metapelitic Gneiss		Metamorphic	EMPA					348		25			4.359	0.18	0.08
https://doi.org/10.1016/j.gr.2020.04.004	[0001]	dr4b_9_3		OROGEN	Austria	Bohemian Massif / Variscan Orogen	Metapelite	Granulite/Amphibolite	Metapelitic Gneiss		Metamorphic	EMPA					327		27			3.304	0.401	0.071
https://doi.org/10.1016/j.gr.2020.04.004	[0001]	dr10_8_1		OROGEN	Austria	Bohemian Massif / Variscan Orogen	Metapelite	Granulite/Amphibolite	Metapelitic Gneiss		Metamorphic	EMPA					334		20			4.076	0.192	0.072
https://doi.org/10.1016/j.gr.2020.04.004	[0001]	dr10_8_2		OROGEN	Austria	Bohemian Massif / Variscan Orogen	Metapelite	Granulite/Amphibolite	Metapelitic Gneiss		Metamorphic	EMPA					357		21			4.005	0.185	0.075
https://doi.org/10.1016/j.gr.2020.04.004	[0001]	dr10_8_3		OROGEN	Austria	Bohemian Massif / Variscan Orogen	Metapelite	Granulite/Amphibolite	Metapelitic Gneiss		Metamorphic	EMPA					332		20			4.183	0.193	0.073
https://doi.org/10.1016/j.gr.2020.04.004	[0001]	dr10_8_4		OROGEN	Austria	Bohemian Massif / Variscan Orogen	Metapelite	Granulite/Amphibolite	Metapelitic Gneiss		Metamorphic	EMPA					347		23			3.532	0.205	0.067
https://doi.org/10.1016/j.gr.2020.04.004	[0001]	dr10_8_5		OROGEN	Austria	Bohemian Massif / Variscan Orogen	Metapelite	Granulite/Amphibolite	Metapelitic Gneiss		Metamorphic	EMPA					331		22			3.746	0.202	0.067
https://doi.org/10.1016/j.gr.2020.04.004	[0001]	dr10_8_6		OROGEN	Austria	Bohemian Massif / Variscan Orogen	Metapelite	Granulite/Amphibolite	Metapelitic Gneiss		Metamorphic	EMPA					357		23			3.497	0.212	0.068
https://doi.org/10.1016/j.gr.2020.04.004	[0001]	dr10_8_8		OROGEN	Austria	Bohemian Massif / Variscan Orogen	Metapelite	Granulite/Amphibolite	Metapelitic Gneiss		Metamorphic	EMPA					343		24			3.506	0.169	0.064
https://doi.org/10.1016/j.gr.2020.04.004	[0001]	dr10_8_9		OROGEN	Austria	Bohemian Massif / Variscan Orogen	Metapelite	Granulite/Amphibolite	Metapelitic Gneiss		Metamorphic	EMPA					334		20			4.139	0.189	0.072
https://doi.org/10.1016/j.gr.2020.04.004	[0001]	dr10_8_10		OROGEN	Austria	Bohemian Massif / Variscan Orogen	Metapelite	Granulite/Amphibolite	Metapelitic Gneiss		Metamorphic	EMPA					339		28			3.801	0.195	0.066
https://doi.org/10.1016/j.gr.2020.04.004	[0001]	dr10_8_11		OROGEN	Austria	Bohemian Massif / Variscan Orogen	Metapelite	Granulite/Amphibolite	Metapelitic Gneiss		Metamorphic	EMPA					351		26			4.016	0.197	0.072
https://doi.org/10.1016/j.gr.2020.04.004	[0001]	dr10_8_12		OROGEN	Austria	Bohemian Massif / Variscan Orogen	Metapelite	Granulite/Amphibolite	Metapelitic Gneiss		Metamorphic	EMPA					340		25			4.236	0.185	0.076
https://doi.org/10.1016/j.gr.2020.04.004	[0001]	dr10_12_1		OROGEN	Austria	Bohemian Massif / Variscan Orogen	Metapelite	Granulite/Amphibolite	Metapelitic Gneiss		Metamorphic	EMPA					344		23			4.173	0.352	0.084
https://doi.org/10.1016/j.gr.2020.04.004	[0001]	dr10_12_2		OROGEN	Austria	Bohemian Massif / Variscan Orogen	Metapelite	Granulite/Amphibolite	Metapelitic Gneiss		Metamorphic	EMPA					325		31			3.675	0.113	0.061
https://doi.org/10.1016/j.gr.2020.04.004	[0001]	dr10_12_4		OROGEN	Austria	Bohemian Massif / Variscan Orogen	Metapelite	Granulite/Amphibolite	Metapelitic Gneiss		Metamorphic	EMPA					331		26			4.263	0.126	0.071
https://doi.org/10.1016/j.gr.2020.04.004	[0001]	dr10_9_1		OROGEN	Austria	Bohemian Massif / Variscan Orogen	Metapelite	Granulite/Amphibolite	Metapelitic Gneiss		Metamorphic	EMPA					340		20			5.088	0.111	0.081
https://doi.org/10.1016/j.gr.2020.04.004	[0001]	dr10_9_2		OROGEN	Austria	Bohemian Massif / Variscan Orogen	Metapelite	Granulite/Amphibolite	Metapelitic Gneiss		Metamorphic	EMPA					339		20			5.053	0.099	0.08
https://doi.org/10.1016/j.gr.2020.04.004	[0001]	dr10_9_3		OROGEN	Austria	Bohemian Massif / Variscan Orogen	Metapelite	Granulite/Amphibolite	Metapelitic Gneiss		Metamorphic	EMPA					329		20			5.106	0.099	0.078
https://doi.org/10.1016/j.gr.2020.04.004	[0001]	dr10_9_4		OROGEN	Austria	Bohemian Massif / Variscan Orogen	Metapelite	Granulite/Amphibolite	Metapelitic Gneiss		Metamorphic	EMPA					347		20			5.044	0.103	0.082
https://doi.org/10.1016/j.gr.2020.04.004	[0001]	dr10_9_5		OROGEN	Austria	Bohemian Massif / Variscan Orogen	Metapelite	Granulite/Amphibolite	Metapelitic Gneiss		Metamorphic	EMPA					329		19			5.352	0.114	0.083
https://doi.org/10.1016/j.gr.2020.04.004	[0001]	dr10_9_6		OROGEN	Austria	Bohemian Massif / Variscan Orogen	Metapelite	Granulite/Amphibolite	Metapelitic Gneiss		Metamorphic	EMPA					335		19			5.282	0.11	0.083
https://doi.org/10.1016/j.gr.2020.04.004	[0001]	dr10_9_7		OROGEN	Austria	Bohemian Massif / Variscan Orogen	Metapelite	Granulite/Amphibolite	Metapelitic Gneiss		Metamorphic	EMPA					336		26			2.742	0.439	0.063
https://doi.org/10.1016/j.gr.2020.04.004	[0001]	dr10_9_10		OROGEN	Austria	Bohemian Massif / Variscan Orogen	Metapelite	Granulite/Amphibolite	Metapelitic Gneiss		Metamorphic	EMPA					344		19			5.396	0.116	0.087
https://doi.org/10.1016/j.gr.2020.04.004	[0001]	dr10_9_11		OROGEN	Austria	Bohemian Massif / Variscan Orogen	Metapelite	Granulite/Amphibolite	Metapelitic Gneiss		Metamorphic	EMPA					330		19			5.457	0.114	0.084
https://doi.org/10.1016/j.gr.2020.04.004	[0001]	dr10_9_12		OROGEN	Austria	Bohemian Massif / Variscan Orogen	Metapelite	Granulite/Amphibolite	Metapelitic Gneiss		Metamorphic	EMPA					337		19			5.352	0.107	0.084
https://doi.org/10.1016/j.gr.2020.04.004	[0001]	dr10_9_14		OROGEN	Austria	Bohemian Massif / Variscan Orogen	Metapelite	Granulite/Amphibolite	Metapelitic Gneiss		Metamorphic	EMPA					347		22			3.999	0.27	0.075
https://doi.org/10.1016/j.gr.2020.04.004	[0001]	dr10_9_1		OROGEN	Austria	Bohemian Massif / Variscan Orogen	Metapelite	Granulite/Amphibolite	Metapelitic Gneiss		Metamorphic	EMPA					334		22			3.999	0.278	0.072
https://doi.org/10.1016/j.gr.2020.04.004	[0001]	dr10_9_2		OROGEN	Austria	Bohemian Massif / Variscan Orogen	Metapelite	Granulite/Amphibolite	Metapelitic Gneiss		Metamorphic	EMPA					359		20			5.159	0.109	0.087
https://doi.org/10.1016/j.gr.2020.04.004	[0001]	dr10_9_4		OROGEN	Austria	Bohemian Massif / Variscan Orogen	Metapelite	Granulite/Amphibolite	Metapelitic Gneiss		Metamorphic	EMPA					352		21			4.86	0.125	0.082
https://doi.org/10.1016/j.gr.2020.04.004	[0001]	dr10_9_5		OROGEN	Austria	Bohemian Massif / Variscan Orogen	Metapelite	Granulite/Amphibolite	Metapelitic Gneiss		Metamorphic	EMPA					356		20			5.141	0.108	0.086
https://doi.org/10.1016/j.gr.2020.04.004	[0001]	dr10_9_7		OROGEN	Austria	Bohemian Massif / Variscan Orogen	Metapelite	Granulite/Amphibolite	Metapelitic Gneiss		Metamorphic	EMPA					360		21			4.895	0.1	0.083
https://doi.org/10.1016/j.gr.2020.04.004	[0001]	dr10_9_8		OROGEN	Austria	Bohemian Massif / Variscan Orogen	Metapelite	Granulite/Amphibolite	Metapelitic Gneiss		Metamorphic	EMPA					357		25			3.594	0.25	0.07
https://doi.org/10.1016/j.gr.2020.04.004	[0001]	dr10_9_8		OROGEN	Austria	Bohemian Massif / Variscan Orogen	Metapelite	Granulite/Amphibolite	Metapelitic Gneiss		Metamorphic	EMPA					358		23			3.963	0.264	0.076
https://doi.org/10.1016/j.gr.2020.04.004	[0001]	dr10_9_10		OROGEN	Austria	Bohemian Massif / Variscan Orogen	Metapelite	Granulite/Amphibolite	Metapelitic Gneiss		Metamorphic	EMPA					339		21			4.935	0.095	0.081
https://doi.org/10.1016/j.gr.2020.04.004	[0001]	dr10_9_13		OROGEN	Austria	Bohemian Massif / Variscan Orogen	Metapelite	Granulite/Amphibolite	Metapelitic Gneiss		Metamorphic	EMPA					335		19			5.397	0.103	0.087
https://doi.org/10.1016/j.gr.2020.04.004	[0001]	dr10_13_1		OROGEN	Austria	Bohemian Massif / Variscan Orogen	Metapelite	Granulite/Amphibolite	Metapelitic Gneiss		Metamorphic	EMPA					339		27			3.753	0.113	0.061
https://doi.org/10.1016/j.gr.2020.04.004	[0001]	dr10_13_1		OROGEN	Austria	Bohemian Massif / Variscan Orogen	Metapelite	Granulite/Amphibolite	Metapelitic Gneiss		Metamorphic	EMPA					319		26			3.79	0.113	0.061
https://doi.org/10.1016/j.gr.2020.04.004	[0001]	dr10_13_5		OROGEN	Austria	Bohemian Massif / Variscan Orogen	Metapelite	Granulite/Amphibolite	Metapelitic Gneiss		Metamorphic	EMPA					352		29			3.419	0.122	0.059
https://doi.org/10.1016/j.gr.2020.04.004	[0001]	dr10_13_5		OROGEN	Austria	Bohemian Massif / Variscan Orogen	Metapelite	Granulite/Amphibolite	Metapelitic Gneiss		Metamorphic	EMPA					331		28			3.453	0.122	0.059
https://doi.org/10.1016/j.gr.2020.04.004	[0001]	dr10_13_1		OROGEN	Austria	Bohemian Massif / Variscan Orogen	Metapelite	Granulite/Amphibolite	Metapelitic Gneiss		Metamorphic	EMPA					339		27			3.753	0.113	0.061
https://doi.org/10.1016/j.gr.2020.04.004	[0001]	dr10_13_1		OROGEN	Austria	Bohemian Massif / Variscan Orogen	Metapelite	Granulite/Amphibolite	Metapelitic Gneiss		Metamorphic	EMPA					324		25			3.941	0.111	0.064
https://doi.org/10.1016/j.gr.2020.04.004	[0001]	dr10_13_2		OROGEN	Austria	Bohemian Massif / Variscan Orogen	Metapelite	Granulite/Amphibolite	Metapelitic Gneiss		Metamorphic	EMPA					356		26			3.79	0.109	0.068
https://doi.org/10.1016/j.gr.2020.04.004	[0001]	dr10_13_8		OROGEN	Austria	Bohemian Massif / Variscan Orogen	Metapelite	Granulite/Amphibolite	Metapelitic Gneiss		Metamorphic	EMPA					337		28			3.488	0.14	0.061
https://doi.org/10.1016/j.gr.2020.04.004	[0001]	dr10_14_1		OROGEN	Austria	Bohemian Massif / Variscan Orogen	Metapelite	Granulite/Amphibolite	Metapelitic Gneiss		Metamorphic	EMPA					351		23			4.358	0.098	0.075
https://doi.org/10.1016/j.gr.2020.04.004	[0001]	dr10_14_2		OROGEN	Austria	Bohemian Massif / Variscan Orogen	Metapelite	Granulite/Amphibolite	Metapelitic Gneiss		Metamorphic	EMPA					355		26			3.941	0.096	0.069
https://doi.org/10.1016/j.gr.2020.04.004	[0001]	dr10_14_4		OROGEN	Austria	Bohemian Massif / Variscan Orogen	Metapelite	Granulite/Amphibolite	Metapelitic Gneiss		Metamorphic	EMPA					349		30			2.76	0.28	0.06
https://doi.org/10.1016/j.gr.2020.04.004	[0001]	dr10_14_5		OROGEN	Austria	Bohemian Massif / Variscan Orogen	Metapelite	Granulite/Amphibolite	Metapelitic Gneiss		Metamorphic	EMPA					354		25			3.932	0.122	0.07
https://doi.org/10.1016/j.gr.2020.04.004	[0001]	dr10_14_7		OROGEN	Austria	Bohemian Massif / Variscan Orogen	Metapelite	Granulite/Amphibolite	Metapelitic Gneiss		Metamorphic	EMPA					355		28			3.586	0.115	0.065
https://doi.org/10.1016/j.gr.2020.04.004	[0001]	dr10_14_8		OROGEN	Austria	Bohemian Massif / Variscan Orogen	Metapelite	Granulite/Amphibolite	Metapelitic Gneiss		Metamorphic	EMPA					349		28			3.311	0.166	0.062
https://doi.org/10.1016/j.gr.2020.04.004	[0001]	dr10_14_9		OROGEN	Austria	Bohemian Massif / Variscan Orogen	Metapelite	Granulite/Amphibolite	Metapelitic Gneiss		Metamorphic	EMPA					348		27			3.629	0.112	0.061
https://doi.org/10.1016/j.gr.2020.04.004	[0001]	dr10_14_10		OROGEN	Austria	Bohemian Massif / Variscan Orogen	Metapelite	Granulite/Amphibolite	Metapelitic Gneiss		Metamorphic	EMPA					350		29			3.463	0.114	0.059
https://doi.org/10.1016/j.gr.2020.04.004	[0001]	dr10_14_14		OROGEN	Austria	Bohemian Massif / Variscan Orogen	Metapelite	Granulite/Amphibolite	Metapelitic Gneiss		Metamorphic	EMPA					339		26			3.858	0.115	0.063
https://doi.org/10.1016/j.gr.2020.04.004	[0001]	dr10_14_15		OROGEN	Austria	Bohemian Massif / Variscan Orogen	Metapelite	Granulite/Amphibolite	Metapelitic Gneiss		Metamorphic	EMPA					354		23			4.526	0.094	0.075
https://doi.org/10.1016/j.gr.2020.04.004	[0001]	dr10_14_16		OROGEN	Austria	Bohemian Massif / Variscan Orogen	Metapelite	Granulite/Amphibolite	Metapelitic Gneiss		Metamorphic	EMPA					358		22			4.57	0.099	0.077
https://doi.org/10.1016/j.gr.2020.04.004	[0001]	dr10_14_19		OROGEN	Austria	Bohemian Massif / Variscan Orogen	Metapelite	Granulite/Amphibolite	Metapelitic Gneiss		Metamorphic	EMPA					357		25			3.99	0.098	0.067
https://doi.org/10.1016/j.gr.2020.04.004	[0001]	dr10_14_20		OROGEN	Austria	Bohemian Massif / Variscan Orogen	Metapelite	Granulite/Amphibolite	Metapelitic Gneiss		Metamorphic	EMPA					364		23			4.403	0.103	0.076
https://doi.org/10.1016/j.gr.2020.04.004	[0001]	dr10_19_1		OROGEN	Austria	Bohemian Massif / Variscan Orogen	Metapelite	Granulite/Amphibolite	Metapelitic Gneiss		Metamorphic	EMPA					332		30			2.856	0.379	0.064
https://doi.org/10.1016/j.gr.2020.04.004	[0001]	dr10_19_2		OROGEN	Austria	Bohemian Massif / Variscan Orogen	Metapelite	Granulite/Amphibolite	Metapelitic Gneiss		Metamorphic	EMPA					339		30			2.962	0.361	0.066
https://doi.org/10.1016/j.gr.2020.04.004	[0001]	dr10_16_1		OROGEN	Austria	Bohemian Massif / Variscan Orogen	Metapelite	Granulite/Amphibolite	Metapelitic Gneiss		Metamorphic	EMPA					367		63			0.943	0.242	0.028
https://doi.org/10.1016/j.gr.2020.04.004	[0001]	dr10_2_1		OROGEN	Austria	Bohemian Massif / Variscan Orogen	Metapelite	Granulite/Amphibolite	Metapelitic Gneiss		Metamorphic	EMPA					394		46			1.819	0.176	0.042
https://doi.org/10.1016/j.gr.2020.04.004	[0001]	dr10_2_3		OROGEN	Austria	Bohemian Massif / Variscan Orogen	Metapelite	Granulite/Amphibolite	Metapelitic Gneiss		Metamorphic	EMPA					388		51			1.389	0.235	0.037
https://doi.org/10.1016/j.gr.2020.04.004	[0001]	dr10_2_5		OROGEN	Austria	Bohemian Massif / Variscan Orogen	Metapelite	Granulite/Amphibolite	Metapelitic Gneiss		Metamorphic	EMPA					378		39			1.819	0.303	0.047
https://doi.org/10.1016/j.gr.2020.04.004	[0001]	dr10_2_6		OROGEN	Austria	Bohemian Massif / Variscan Orogen	Metapelite	Granulite/Amphibolite	Metapelitic Gneiss		Metamorphic	EMPA					398		49			1.406	0.252	0.04
https://doi.org/10.1016/j.gr.2020.04.004	[0001]	dr10_2_7		OROGEN	Austria	Bohemian Massif / Variscan Orogen	Metapelite	Granulite/Amphibolite	Metapelitic Gneiss		Metamorphic	EMPA					363		47			1.424	0.27	0.037
https://doi.org/10.1016/j.gr.2020.04.004	[0001]	dr10_7_3		OROGEN	Austria	Bohemian Massif / Variscan Orogen	Metapelite	Granulite/Amphibolite	Metapelitic Gneiss		Metamorphic	EMPA					371		37			2.069	0.164	0.045
https://doi.org/10.1016/j.gr.2020.04.004	[0001]	dr10_7_4		OROGEN	Austria	Bohemian Massif / Variscan Orogen	Metapelite	Granulite/Amphibolite	Metapelitic Gneiss		Metamorphic	EMPA					387		37			2.078	0.16	0.047
https://doi.org/10.1016/j.gr.2020.04.004	[0001]	dr10_16_3_1		OROGEN	Austria	Bohemian Massif / Variscan Orogen	Metapelite	Granulite/Amphibolite	Metapelitic Gneiss		Metamorphic	EMPA					369		50			0.738	0.364	0.035
https://doi.org/10.1016/j.gr.2020.04.004	[0001]	dr10_16_3_2		OROGEN	Austria	Bohemian Massif / Variscan Orogen	Metapelite	Granulite/Amphibolite	Metapelitic Gneiss		Metamorphic	EMPA					355		46			0.742	0.408	0.036
https://doi.org/10.1016/j.gr.2020.04.004	[0001]	dr10_16_3_3		OROGEN	Austria	Bohemian Massif / Variscan Orogen	Metapelite	Granulite/Amphibolite	Metapelitic Gneiss		Metamorphic	EMPA					396		46			0.757	0.403	0.04
https://doi.org/10.1016/j.gr.2020.04.004	[0001]	dr4a_1_1		OROGEN	Austria	Bohemian Massif / Variscan Orogen	Metapelite	Granulite/Amphibolite	Metapelitic Gneiss		Metamorphic	EMPA					366		36			1.044	0.484	0.046
https://doi.org/10.1016/j.gr.2020.04.004	[0001]	dr4a_1_3		OROGEN	Austria	Bohemian Massif / Variscan Orogen	Metapelite	Granulite/Amphibolite	Metapelitic Gneiss		Metamorphic	EMPA					356		49			0.839	0.342	0.034
https://doi.org/10.1016/j.gr.2020.04.004	[0001]	dr4a_1_4		OROGEN	Austria	Bohemian Massif / Variscan Orogen	Metapelite	Granulite/Amphibolite	Metapelitic Gneiss		Metamorphic	EMPA					354		39			0.901	0.48	0.042
https://doi.org/10.1016/j.gr.2020.04.004	[0001]	dr4a_1_5		OROGEN	Austria	Bohemian Massif / Variscan Orogen	Metapelite	Granulite/Amphibolite	Metapelitic Gneiss		Metamorphic	EMPA					388		40			1.383	0.312	0.044
https://doi.org/10.1016/j.gr.2020.04.004	[0001]	dr4a_1_6		OROGEN	Austria	Bohemian Massif / Variscan Orogen	Metapelite	Granulite/Amphibolite	Metapelitic Gneiss		Metamorphic	EMPA					389		41			1.374	0.3	0.044
https://doi.org/10.1016/j.gr.2020.04.004	[0001]	dr4a_1_7		OROGEN	Austria	Bohemian Massif / Variscan Orogen	Metapelite	Granulite/Amphibolite	Metapelitic Gneiss		Metamorphic	EMPA					350		44			1.258	0.287	0.037
https://doi.org/10.1016/j.gr.2020.04.004	[0001]	dr10_2_10		OROGEN	Austria	Bohemian Massif / Variscan Orogen	Metapelite	Granulite/Amphibolite	Metapelitic Gneiss		Metamorphic	EMPA					373		38			1.864	0.415	0.054
https://doi.org/10.1016/j.gr.2020.04.004	[0001]	dr10_4_2		OROGEN	Austria	Bohemian Massif / Variscan Orogen	Metapelite	Granulite/Amphibolite	Metapelitic Gneiss		Metamorphic	EMPA					364		38			2.498	0.234	0.056
https://doi.org/10.1016/j.gr.2020.04.004	[0001]	dr10_11_6		OROGEN	Austria	Bohemian Massif / Variscan Orogen	Metapelite	Granulite/Amphibolite	Metapelitic Gneiss		Metamorphic	EMPA					375		40			2.29	0.237	0.054
https://doi.org/10.1016/j.gr.2020.04.004	[0001]	dr10_11_9		OROGEN	Austria	Bohemian Massif / Variscan Orogen	Metapelite	Granulite/Amphibolite	Metapelitic Gneiss		Metamorphic	EMPA					366		42			2.329	0.187	0.048
https://doi.org/10.1016/j.gr.2020.04.004	[0001]	dr10_11_12		OROGEN	Austria	Bohemian Massif / Variscan Orogen	Metapelite	Granulite/Amphibolite	Metapelitic Gneiss		Metamorphic	EMPA					365		40			2.707	0.107	0.049
https://doi.org/10.1016/j.gr.2020.04.004	[0001]	dr10_11_1		OROGEN	Austria	Bohemian Massif / Variscan Orogen	Metapelite	Granulite/Amphibolite	Metapelitic Gneiss		Metamorphic / Xenocryst	EMPA					651		35			1.881	0.364	0.09
https://doi.org/10.1016/j.gr.2020.04.004	[0001]	dr10_11_4		OROGEN	Austria	Bohemian Massif / Variscan Orogen	Metapelite	Granulite/Amphibolite	Metapelitic Gneiss		Metamorphic / Xenocryst	EMPA					656		39			1.67	0.323	0.081
https://doi.org/10.1016/j.gr.2020.04.004	[0001]	dr10_11_5		OROGEN	Austria	Bohemian Massif / Variscan Orogen	Metapelite	Granulite/Amphibolite	Metapelitic Gneiss		Metamorphic / Xenocryst	EMPA					654		46			1.459	0.267	0.069
https://doi.org/10.1016/j.gr.2020.04.004	[0001]	dr10_11_5		OROGEN	Austria	Bohemian Massif / Variscan Orogen	Metapelite	Granulite/Amphibolite	Metapelitic Gneiss		Metamorphic / Xenocryst	EMPA					661		51			1.457	0.284	0.074
https://doi.org/10.1016/j.gr.2020.04.004	[0001]	dr10_11_8		OROGEN	Austria	Bohemian Massif / Variscan Orogen	Metapelite	Granulite/Amphibolite	Metapelitic Gneiss		Metamorphic / Xenocryst	EMPA					666		41			1.52	0.444	0.089
https://doi.org/10.1016/j.gr.2020.04.004	[0001]	dr10_11_13		OROGEN	Austria	Bohemian Massif / Variscan Orogen	Metapelite	Granulite/Amphibolite	Metapelitic Gneiss		Metamorphic / Xenocryst	EMPA					636		43			1.793	0.323	0.081
https://doi.org/10.1016/j.gr.2020.04.004	[0001]	dr10_11_14		OROGEN	Austria	Bohemian Massif / Variscan Orogen	Metapelite	Granulite/Amphibolite	Metapelitic Gneiss		Metamorphic / Xenocryst	EMPA					644		38			1.889	0.39	0.092
https://doi.org/10.1016/j.gr.2020.04.004	[0001]	dr10_11_2		OROGEN	Austria	Bohemian Massif / Variscan Orogen	Metapelite	Granulite/Amphibolite	Metapelitic Gneiss		Metamorphic / Xenocryst	EMPA					558		37			2.065	0.276	0.074
https://doi.org/10.1016/j.gr.2020.04.004	[0001]	dr10_11_6		OROGEN	Austria	Bohemian Massif / Variscan Orogen	Metapelite	Granulite/Amphibolite	Metapelitic Gneiss		Metamorphic / Xenocryst	EMPA					551		38			1.969	0.271	0.07
https://doi.org/10.1016/j.gr.2020.04.004	[0001]	dr10_11_2		OROGEN	Austria	Bohemian Massif / Variscan Orogen	Metapelite	Granulite/Amphibolite	Metapelitic Gneiss		Metamorphic / Xenocryst	EMPA					579		38			2.495	0.384	0.105
https://doi.org/10.1016/j.gr.2020.04.004	[0001]	dr10_11_3		OROGEN	Austria	Bohemian Massif / Variscan Orogen	Metapelite	Granulite/Amphibolite	Metapelitic Gneiss		Metamorphic / Xenocryst	EMPA					582		54			1.572	0.324	0.078
https://doi.org/10.1016/j.jseaes.2020.104406	[0002]	RG38-1		OROGEN	Nepal	Central Nepal / Himalayan Orogen	Metapelite	Amphibolite	Garnet Mica Schist		Metamorphic	LAICPMS													0.00329		0.00022								0.00099		4e-05		21.2		1.46							20
https://doi.org/10.1016/j.jseaes.2020.104406	[0002]	RG38-10.1		OROGEN	Nepal	Central Nepal / Himalayan Orogen	Metapelite	Amphibolite	Garnet Mica Schist		Metamorphic	LAICPMS													0.00269		0.00012								0.00082		2e-05		17.3		0.76							16.6
https://doi.org/10.1016/j.jseaes.2020.104406	[0002]	RG38-10.2		OROGEN	Nepal	Central Nepal / Himalayan Orogen	Metapelite	Amphibolite	Garnet Mica Schist		Metamorphic	LAICPMS													0.00273		0.00014								0.00084		2e-05		17.6		0.94							16.9
https://doi.org/10.1016/j.jseaes.2020.104406	[0002]	RG38-12.1		OROGEN	Nepal	Central Nepal / Himalayan Orogen	Metapelite	Amphibolite	Garnet Mica Schist		Metamorphic	LAICPMS													0.00328		0.00014								0.00108		2e-05		21.1		0.86							21.8
https://doi.org/10.1016/j.jseaes.2020.104406	[0002]	RG38-12.2		OROGEN	Nepal	Central Nepal / Himalayan Orogen	Metapelite	Amphibolite	Garnet Mica Schist		Metamorphic	LAICPMS													0.00369		0.00014								0.00117		4e-05		23.7		0.94							23.7
https://doi.org/10.1016/j.jseaes.2020.104406	[0002]	RG38-2.1		OROGEN	Nepal	Central Nepal / Himalayan Orogen	Metapelite	Amphibolite	Garnet Mica Schist		Metamorphic	LAICPMS													0.00264		0.00018								0.00092		4e-05		17		1.18							18.6
https://doi.org/10.1016/j.jseaes.2020.104406	[0002]	RG38-2.2		OROGEN	Nepal	Central Nepal / Himalayan Orogen	Metapelite	Amphibolite	Garnet Mica Schist		Metamorphic	LAICPMS													0.00277		0.0002								0.0009		4e-05		17.8		1.3							18.3
https://doi.org/10.1016/j.jseaes.2020.104406	[0002]	RG38-3.1		OROGEN	Nepal	Central Nepal / Himalayan Orogen	Metapelite	Amphibolite	Garnet Mica Schist		Metamorphic	LAICPMS													0.00294		0.00012								0.00094		2e-05		18.9		0.74							19
https://doi.org/10.1016/j.jseaes.2020.104406	[0002]	RG38-4		OROGEN	Nepal	Central Nepal / Himalayan Orogen	Metapelite	Amphibolite	Garnet Mica Schist		Metamorphic	LAICPMS													0.0034		0.00022								0.00111		4e-05		21.8		1.44							22.3
https://doi.org/10.1016/j.jseaes.2020.104406	[0002]	RG38-6.1		OROGEN	Nepal	Central Nepal / Himalayan Orogen	Metapelite	Amphibolite	Garnet Mica Schist		Metamorphic	LAICPMS													0.00303		0.00012								0.00098		2e-05		19.5		0.8							19.9
https://doi.org/10.1016/j.jseaes.2020.104406	[0002]	RG38-6.2		OROGEN	Nepal	Central Nepal / Himalayan Orogen	Metapelite	Amphibolite	Garnet Mica Schist		Metamorphic	LAICPMS													0.00329		0.00014								0.00109		4e-05		21.2		0.94							22
https://doi.org/10.1016/j.jseaes.2020.104406	[0002]	RG38-6.3		OROGEN	Nepal	Central Nepal / Himalayan Orogen	Metapelite	Amphibolite	Garnet Mica Schist		Metamorphic	LAICPMS													0.00315		0.00014								0.00106		4e-05		20.3		0.9							21.4
https://doi.org/10.1016/j.jseaes.2020.104406	[0002]	RG38-7		OROGEN	Nepal	Central Nepal / Himalayan Orogen	Metapelite	Amphibolite	Garnet Mica Schist		Metamorphic	LAICPMS													0.00284		0.00012								0.00086		2e-05		18.3		0.82							17.3
https://doi.org/10.1016/j.jseaes.2020.104406	[0002]	RG19_1		OROGEN	Nepal	Central Nepal / Himalayan Orogen	Metapelite	Amphibolite	garnet biotite gneiss		Metamorphic	LAICPMS													0.00226		0.00014								0.00076		4e-05		14.5		0.9							15.3
https://doi.org/10.1016/j.jseaes.2020.104406	[0002]	RG19_2		OROGEN	Nepal	Central Nepal / Himalayan Orogen	Metapelite	Amphibolite	garnet biotite gneiss		Metamorphic	LAICPMS													0.00254		0.0001								0.0008		2e-05		16.3		0.62							16.1
https://doi.org/10.1016/j.jseaes.2020.104406	[0002]	RG19_4		OROGEN	Nepal	Central Nepal / Himalayan Orogen	Metapelite	Amphibolite	garnet biotite gneiss		Metamorphic	LAICPMS													0.00226		8e-05								0.00076		2e-05		14.5		0.56							15.4
https://doi.org/10.1016/j.jseaes.2020.104406	[0002]	RG19_5		OROGEN	Nepal	Central Nepal / Himalayan Orogen	Metapelite	Amphibolite	garnet biotite gneiss		Metamorphic	LAICPMS													0.00239		0.00014								0.00069		2e-05		15.4		0.88							13.9
https://doi.org/10.1016/j.jseaes.2020.104406	[0002]	RG19_6.1		OROGEN	Nepal	Central Nepal / Himalayan Orogen	Metapelite	Amphibolite	garnet biotite gneiss		Metamorphic	LAICPMS													0.00233		8e-05								0.00077		2e-05		15		0.58							15.6
https://doi.org/10.1016/j.jseaes.2020.104406	[0002]	RG19_6.2		OROGEN	Nepal	Central Nepal / Himalayan Orogen	Metapelite	Amphibolite	garnet biotite gneiss		Metamorphic	LAICPMS													0.00221		0.00016								0.00076		4e-05		14.3		0.98							15.4
https://doi.org/10.1016/j.jseaes.2020.104406	[0002]	RG19_7		OROGEN	Nepal	Central Nepal / Himalayan Orogen	Metapelite	Amphibolite	garnet biotite gneiss		Metamorphic	LAICPMS													0.0023		8e-05								0.00074		2e-05		14.8		0.58							15
https://doi.org/10.1016/j.jseaes.2020.104406	[0002]	RG19_8		OROGEN	Nepal	Central Nepal / Himalayan Orogen	Metapelite	Amphibolite	garnet biotite gneiss		Metamorphic	LAICPMS													0.0023		0.0001								0.00073		2e-05		14.8		0.68							14.7
https://doi.org/10.1016/j.jseaes.2020.104406	[0002]	RG10_1.2		OROGEN	Nepal	Central Nepal / Himalayan Orogen	Metapelite	Granulite	Paragneiss		Metamorphic	LAICPMS													0.00368		0.0003								0.00124		6e-05		23.7		1.9							25
https://doi.org/10.1016/j.jseaes.2020.104406	[0002]	RG10_10.1		OROGEN	Nepal	Central Nepal / Himalayan Orogen	Metapelite	Granulite	Paragneiss		Metamorphic	LAICPMS													0.00453		0.00014								0.0014		4e-05		29.1		0.94							28.3
https://doi.org/10.1016/j.jseaes.2020.104406	[0002]	RG10_10.2		OROGEN	Nepal	Central Nepal / Himalayan Orogen	Metapelite	Granulite	Paragneiss		Metamorphic	LAICPMS													0.00402		0.00014								0.00128		2e-05		25.9		0.88							25.9
https://doi.org/10.1016/j.jseaes.2020.104406	[0002]	RG10_13.1		OROGEN	Nepal	Central Nepal / Himalayan Orogen	Metapelite	Granulite	Paragneiss		Metamorphic	LAICPMS													0.00314		0.0002								0.00094		4e-05		20.2		1.28							19.1
https://doi.org/10.1016/j.jseaes.2020.104406	[0002]	RG10_3.1		OROGEN	Nepal	Central Nepal / Himalayan Orogen	Metapelite	Granulite	Paragneiss		Metamorphic	LAICPMS													0.00452		0.00014								0.00144		2e-05		29.1		0.86							29.2
https://doi.org/10.1016/j.jseaes.2020.104406	[0002]	RG10_3.10		OROGEN	Nepal	Central Nepal / Himalayan Orogen	Metapelite	Granulite	Paragneiss		Metamorphic	LAICPMS													0.00472		0.00014								0.00149		4e-05		30.4		0.88							30.2
https://doi.org/10.1016/j.jseaes.2020.104406	[0002]	RG10_3.11		OROGEN	Nepal	Central Nepal / Himalayan Orogen	Metapelite	Granulite	Paragneiss		Metamorphic	LAICPMS													0.00465		0.00018								0.00153		4e-05		29.9		1.18							31
https://doi.org/10.1016/j.jseaes.2020.104406	[0002]	RG10_3.12		OROGEN	Nepal	Central Nepal / Himalayan Orogen	Metapelite	Granulite	Paragneiss		Metamorphic	LAICPMS													0.00389		0.00014								0.00125		2e-05		25		0.9							25.2
https://doi.org/10.1016/j.jseaes.2020.104406	[0002]	RG10_3.2		OROGEN	Nepal	Central Nepal / Himalayan Orogen	Metapelite	Granulite	Paragneiss		Metamorphic	LAICPMS													0.00466		0.00014								0.00148		2e-05		30		0.86							29.9
https://doi.org/10.1016/j.jseaes.2020.104406	[0002]	RG10_3.3		OROGEN	Nepal	Central Nepal / Himalayan Orogen	Metapelite	Granulite	Paragneiss		Metamorphic	LAICPMS													0.0045		0.00014								0.00143		2e-05		29		0.86							28.8
https://doi.org/10.1016/j.jseaes.2020.104406	[0002]	RG10_3.4		OROGEN	Nepal	Central Nepal / Himalayan Orogen	Metapelite	Granulite	Paragneiss		Metamorphic	LAICPMS													0.00492		0.00014								0.00152		4e-05		31.6		0.94							30.6
https://doi.org/10.1016/j.jseaes.2020.104406	[0002]	RG10_3.5		OROGEN	Nepal	Central Nepal / Himalayan Orogen	Metapelite	Granulite	Paragneiss		Metamorphic	LAICPMS													0.00488		0.00014								0.0015		2e-05		31.4		0.9							30.2
https://doi.org/10.1016/j.jseaes.2020.104406	[0002]	RG10_3.6		OROGEN	Nepal	Central Nepal / Himalayan Orogen	Metapelite	Granulite	Paragneiss		Metamorphic	LAICPMS													0.00458		0.00014								0.00147		4e-05		29.5		0.9							29.7
https://doi.org/10.1016/j.jseaes.2020.104406	[0002]	RG10_3.7		OROGEN	Nepal	Central Nepal / Himalayan Orogen	Metapelite	Granulite	Paragneiss		Metamorphic	LAICPMS													0.00508		0.00016								0.00156		4e-05		32.7		1.04							31.4
https://doi.org/10.1016/j.jseaes.2020.104406	[0002]	RG10_3.8		OROGEN	Nepal	Central Nepal / Himalayan Orogen	Metapelite	Granulite	Paragneiss		Metamorphic	LAICPMS													0.00556		0.00018								0.00165		4e-05		35.7		1.18							33.3
https://doi.org/10.1016/j.jseaes.2020.104406	[0002]	RG10_3.9		OROGEN	Nepal	Central Nepal / Himalayan Orogen	Metapelite	Granulite	Paragneiss		Metamorphic	LAICPMS													0.00489		0.00014								0.00149		4e-05		31.4		0.9							30.2
https://doi.org/10.1016/j.jseaes.2020.104406	[0002]	RG10_4.1		OROGEN	Nepal	Central Nepal / Himalayan Orogen	Metapelite	Granulite	Paragneiss		Metamorphic	LAICPMS													0.00435		0.00018								0.0014		4e-05		28		1.14							28.3
https://doi.org/10.1016/j.jseaes.2020.104406	[0002]	RG10_4.2		OROGEN	Nepal	Central Nepal / Himalayan Orogen	Metapelite	Granulite	Paragneiss		Metamorphic	LAICPMS													0.00422		0.0002								0.00136		4e-05		27.2		1.34							27.5
https://doi.org/10.1016/j.jseaes.2020.104406	[0002]	RG10_4.3		OROGEN	Nepal	Central Nepal / Himalayan Orogen	Metapelite	Granulite	Paragneiss		Metamorphic	LAICPMS													0.00428		0.0002								0.00136		4e-05		27.5		1.28							27.5
https://doi.org/10.1016/j.jseaes.2020.104406	[0002]	RG10_5.1		OROGEN	Nepal	Central Nepal / Himalayan Orogen	Metapelite	Granulite	Paragneiss		Metamorphic	LAICPMS													0.00301		0.00014								0.00094		2e-05		19.4		0.88							19
https://doi.org/10.1016/j.jseaes.2020.104406	[0002]	RG10_6.1		OROGEN	Nepal	Central Nepal / Himalayan Orogen	Metapelite	Granulite	Paragneiss		Metamorphic	LAICPMS													0.00409		0.00014								0.00121		2e-05		26.3		0.84							24.4
https://doi.org/10.1016/j.jseaes.2020.104406	[0002]	RG10_6.4		OROGEN	Nepal	Central Nepal / Himalayan Orogen	Metapelite	Granulite	Paragneiss		Metamorphic	LAICPMS													0.00465		0.00016								0.00137		4e-05		29.9		0.98							27.8
https://doi.org/10.1016/j.jseaes.2020.104406	[0002]	RG10_6.5		OROGEN	Nepal	Central Nepal / Himalayan Orogen	Metapelite	Granulite	Paragneiss		Metamorphic	LAICPMS													0.0047		0.00014								0.00139		4e-05		30.2		0.96							28.1
https://doi.org/10.1016/j.jseaes.2020.104406	[0002]	RG10_6.6		OROGEN	Nepal	Central Nepal / Himalayan Orogen	Metapelite	Granulite	Paragneiss		Metamorphic	LAICPMS													0.00416		0.00014								0.00125		4e-05		26.8		0.92							25.3
https://doi.org/10.1016/j.jseaes.2020.104406	[0002]	RG10_7.3		OROGEN	Nepal	Central Nepal / Himalayan Orogen	Metapelite	Granulite	Paragneiss		Metamorphic	LAICPMS													0.00421		0.00016								0.00127		2e-05		27.1		0.98							25.6
https://doi.org/10.1016/j.jseaes.2020.104406	[0002]	RG10_7.4		OROGEN	Nepal	Central Nepal / Himalayan Orogen	Metapelite	Granulite	Paragneiss		Metamorphic	LAICPMS													0.00429		0.00014								0.00129		2e-05		27.6		0.86							26.1
https://doi.org/10.1016/j.jseaes.2020.104406	[0002]	RG10_7.5		OROGEN	Nepal	Central Nepal / Himalayan Orogen	Metapelite	Granulite	Paragneiss		Metamorphic	LAICPMS													0.00476		0.00014								0.00141		4e-05		30.6		0.96							28.4
https://doi.org/10.1016/j.jseaes.2020.104406	[0002]	T25-E		OROGEN	Nepal	Central Nepal / Himalayan Orogen	Metapelite	Granulite	Paragneiss		Metamorphic	LAICPMS													0.00285		0.00016								0.00086		2e-05		18.3		1.04							17.3
https://doi.org/10.1016/j.jseaes.2020.104406	[0002]	T25-H1		OROGEN	Nepal	Central Nepal / Himalayan Orogen	Metapelite	Granulite	Paragneiss		Metamorphic	LAICPMS													0.00314		0.00012								0.00098		2e-05		20.2		0.74							19.8
https://doi.org/10.1016/j.jseaes.2020.104406	[0002]	T25-D-3		OROGEN	Nepal	Central Nepal / Himalayan Orogen	Metapelite	Granulite	Paragneiss		Metamorphic	LAICPMS													0.00325		0.00012								0.00099		2e-05		20.9		0.82							20
https://doi.org/10.1016/j.jseaes.2020.104406	[0002]	T25-G3		OROGEN	Nepal	Central Nepal / Himalayan Orogen	Metapelite	Granulite	Paragneiss		Metamorphic	LAICPMS													0.00327		0.00012								0.00102		2e-05		21		0.8							20.6
https://doi.org/10.1016/j.jseaes.2020.104406	[0002]	T25-A		OROGEN	Nepal	Central Nepal / Himalayan Orogen	Metapelite	Granulite	Paragneiss		Metamorphic	LAICPMS													0.00326		0.00014								0.00103		2e-05		21		0.84							20.7
https://doi.org/10.1016/j.jseaes.2020.104406	[0002]	T25-B-1		OROGEN	Nepal	Central Nepal / Himalayan Orogen	Metapelite	Granulite	Paragneiss		Metamorphic	LAICPMS													0.00333		0.00014								0.00102		2e-05		21.4		0.84							20.7
https://doi.org/10.1016/j.jseaes.2020.104406	[0002]	T25-G1		OROGEN	Nepal	Central Nepal / Himalayan Orogen	Metapelite	Granulite	Paragneiss		Metamorphic	LAICPMS													0.00329		0.00012								0.00102		2e-05		21.2		0.8							20.7
https://doi.org/10.1016/j.jseaes.2020.104406	[0002]	T25-D-1		OROGEN	Nepal	Central Nepal / Himalayan Orogen	Metapelite	Granulite	Paragneiss		Metamorphic	LAICPMS													0.00331		0.00014								0.00104		2e-05		21.3		0.9							21
https://doi.org/10.1016/j.jseaes.2020.104406	[0002]	T25-D-2		OROGEN	Nepal	Central Nepal / Himalayan Orogen	Metapelite	Granulite	Paragneiss		Metamorphic	LAICPMS													0.00329		0.00012								0.00105		2e-05		21.2		0.74							21.1
https://doi.org/10.1016/j.jseaes.2020.104406	[0002]	T25-G2		OROGEN	Nepal	Central Nepal / Himalayan Orogen	Metapelite	Granulite	Paragneiss		Metamorphic	LAICPMS													0.00336		0.00012								0.00105		2e-05		21.6		0.8							21.3
https://doi.org/10.1016/j.jseaes.2020.104406	[0002]	T25-I		OROGEN	Nepal	Central Nepal / Himalayan Orogen	Metapelite	Granulite	Paragneiss		Metamorphic	LAICPMS													0.00334		0.00012								0.00105		2e-05		21.5		0.82							21.3
https://doi.org/10.1016/j.jseaes.2020.104406	[0002]	T25-h2		OROGEN	Nepal	Central Nepal / Himalayan Orogen	Metapelite	Granulite	Paragneiss		Metamorphic	LAICPMS													0.00338		0.00012								0.00106		2e-05		21.7		0.8							21.4
https://doi.org/10.1016/j.jseaes.2020.104406	[0002]	T25-B-2		OROGEN	Nepal	Central Nepal / Himalayan Orogen	Metapelite	Granulite	Paragneiss		Metamorphic	LAICPMS													0.00337		0.00014								0.00109		2e-05		21.7		0.86							22
https://doi.org/10.1016/j.jseaes.2020.104406	[0002]	T25-h3		OROGEN	Nepal	Central Nepal / Himalayan Orogen	Metapelite	Granulite	Paragneiss		Metamorphic	LAICPMS													0.00361		0.00014								0.00113		2e-05		23.2		0.86							22.8
https://doi.org/10.1016/j.jseaes.2020.104406	[0002]	T25-F-01		OROGEN	Nepal	Central Nepal / Himalayan Orogen	Metapelite	Granulite	Paragneiss		Metamorphic	LAICPMS													0.00356		0.00022								0.00117		4e-05		22.9		1.46							23.7
https://doi.org/10.1016/j.jseaes.2020.104406	[0002]	T25-J1		OROGEN	Nepal	Central Nepal / Himalayan Orogen	Metapelite	Granulite	Paragneiss		Metamorphic	LAICPMS													0.0039		0.00016								0.0012		2e-05		25.1		0.98							24.2
https://doi.org/10.1016/j.jseaes.2020.104406	[0002]	T25-J2		OROGEN	Nepal	Central Nepal / Himalayan Orogen	Metapelite	Granulite	Paragneiss		Metamorphic	LAICPMS													0.00419		0.00018								0.00135		4e-05		27		1.12							27.2
https://doi.org/10.1016/j.lithos.2020.105585	[0003]	NMC100	1	OROGEN	South Africa	Paulshoek / Namaqua Orogen	Metapelite	Granulite	Spinel-quartz granulite		Metamorphic	LAICPMS													5.75705		0.145832				0.07223		0.0006						1033		24				991		17
https://doi.org/10.1016/j.lithos.2020.105585	[0003]	NMC100	2	OROGEN	South Africa	Paulshoek / Namaqua Orogen	Metapelite	Granulite	Spinel-quartz granulite		Metamorphic	LAICPMS													5.74713		0.135421				0.07395		0.00095						1034.1		22				1038		26
https://doi.org/10.1016/j.lithos.2020.105585	[0003]	NMC100	3	OROGEN	South Africa	Paulshoek / Namaqua Orogen	Metapelite	Granulite	Spinel-quartz granulite		Metamorphic	LAICPMS													5.70776		0.140088				0.0757		0.00079						1041		24				1086		21
https://doi.org/10.1016/j.lithos.2020.105585	[0003]	NMC100	4	OROGEN	South Africa	Paulshoek / Namaqua Orogen	Metapelite	Granulite	Spinel-quartz granulite		Metamorphic	LAICPMS													5.68182		0.138817				0.07432		0.00093						1045		24				1049		25
https://doi.org/10.1016/j.lithos.2020.105585	[0003]	NMC100	5	OROGEN	South Africa	Paulshoek / Namaqua Orogen	Metapelite	Granulite	Spinel-quartz granulite		Metamorphic	LAICPMS													5.63698		0.133457				0.07412		0.00075						1052.5		23				1043		20
https://doi.org/10.1016/j.lithos.2020.105585	[0003]	NMC100	6	OROGEN	South Africa	Paulshoek / Namaqua Orogen	Metapelite	Granulite	Spinel-quartz granulite		Metamorphic	LAICPMS													5.61798		0.142028				0.07305		0.0008						1056		24				1019		20
https://doi.org/10.1016/j.lithos.2020.105585	[0003]	NMC100	7	OROGEN	South Africa	Paulshoek / Namaqua Orogen	Metapelite	Granulite	Spinel-quartz granulite		Metamorphic	LAICPMS													5.61482		0.141868				0.07408		0.00079						1056		25				1042		21
https://doi.org/10.1016/j.lithos.2020.105585	[0003]	NMC100	8	OROGEN	South Africa	Paulshoek / Namaqua Orogen	Metapelite	Granulite	Spinel-quartz granulite		Metamorphic	LAICPMS													6.02773		0.145334				0.07439		0.00083						989.4		22				1050		23
https://doi.org/10.1016/j.lithos.2020.105585	[0003]	NMC100	9	OROGEN	South Africa	Paulshoek / Namaqua Orogen	Metapelite	Granulite	Spinel-quartz granulite		Metamorphic	LAICPMS													5.81734		0.13875				0.07315		0.00094						1022.4		22				1023		24
https://doi.org/10.1016/j.lithos.2020.105585	[0003]	NMC100	10	OROGEN	South Africa	Paulshoek / Namaqua Orogen	Metapelite	Granulite	Spinel-quartz granulite		Metamorphic	LAICPMS													5.82072		0.138911				0.07323		0.00075						1021.9		22				1019		21
https://doi.org/10.1016/j.lithos.2020.105585	[0003]	NMC100	11	OROGEN	South Africa	Paulshoek / Namaqua Orogen	Metapelite	Granulite	Spinel-quartz granulite		Metamorphic	LAICPMS													5.90319		0.135906				0.07297		0.00069						1008.8		22				1012		19
https://doi.org/10.1016/j.lithos.2020.105585	[0003]	NMC100	12	OROGEN	South Africa	Paulshoek / Namaqua Orogen	Metapelite	Granulite	Spinel-quartz granulite		Metamorphic	LAICPMS													5.64972		0.134061				0.074		0.00082						1050.7		23				1040		22
https://doi.org/10.1016/j.lithos.2020.105585	[0003]	NMC100	13	OROGEN	South Africa	Paulshoek / Namaqua Orogen	Metapelite	Granulite	Spinel-quartz granulite		Metamorphic	LAICPMS													5.90319		0.156814				0.07365		0.00051						1009		25				1031		14
https://doi.org/10.1016/j.lithos.2020.105585	[0003]	NMC100	14	OROGEN	South Africa	Paulshoek / Namaqua Orogen	Metapelite	Granulite	Spinel-quartz granulite		Metamorphic	LAICPMS													5.70125		0.159271				0.0733		0.0015						1042		27				1018		42
https://doi.org/10.1016/j.lithos.2020.105585	[0003]	NMC100	15	OROGEN	South Africa	Paulshoek / Namaqua Orogen	Metapelite	Granulite	Spinel-quartz granulite		Metamorphic	LAICPMS													5.76369		0.156135				0.0726		0.0011						1035		24				1009		33
https://doi.org/10.1016/j.lithos.2020.105585	[0003]	NMC100	16	OROGEN	South Africa	Paulshoek / Namaqua Orogen	Metapelite	Granulite	Spinel-quartz granulite		Metamorphic	LAICPMS													5.67215		0.131911				0.074		0.00074						1046.9		22				1040		20
https://doi.org/10.1016/j.lithos.2020.105585	[0003]	NMC100	17	OROGEN	South Africa	Paulshoek / Namaqua Orogen	Metapelite	Granulite	Spinel-quartz granulite		Metamorphic	LAICPMS													5.92768		0.147577				0.074		0.0011						1005		23				1039		29
https://doi.org/10.1016/j.lithos.2020.105585	[0003]	NMC100	18	OROGEN	South Africa	Paulshoek / Namaqua Orogen	Metapelite	Granulite	Spinel-quartz granulite		Metamorphic	LAICPMS													5.65291		0.137408				0.0732		0.001						1050		24				1019		28
https://doi.org/10.1016/j.lithos.2020.105585	[0003]	NMC100	19	OROGEN	South Africa	Paulshoek / Namaqua Orogen	Metapelite	Granulite	Spinel-quartz granulite		Metamorphic	LAICPMS													5.78035		0.136991				0.07465		0.00071						1028.5		23				1058		19
https://doi.org/10.1016/j.lithos.2020.105585	[0003]	NMC100	20	OROGEN	South Africa	Paulshoek / Namaqua Orogen	Metapelite	Granulite	Spinel-quartz granulite		Metamorphic	LAICPMS													5.94177		0.165932				0.0755		0.0013						1002		26				1079		35
https://doi.org/10.1016/j.lithos.2020.105585	[0003]	NMC100	21	OROGEN	South Africa	Paulshoek / Namaqua Orogen	Metapelite	Granulite	Spinel-quartz granulite		Metamorphic	LAICPMS													5.54324		0.132128				0.07366		0.00069						1069		23				1031		19
https://doi.org/10.1016/j.lithos.2020.105585	[0003]	NMC100	22	OROGEN	South Africa	Paulshoek / Namaqua Orogen	Metapelite	Granulite	Spinel-quartz granulite		Metamorphic	LAICPMS													5.77034		0.136517				0.07358		0.00094						1030.4		22				1028		26
https://doi.org/10.1016/j.lithos.2020.105585	[0003]	NMC100	23	OROGEN	South Africa	Paulshoek / Namaqua Orogen	Metapelite	Granulite	Spinel-quartz granulite		Metamorphic	LAICPMS													5.69476		0.132964				0.07442		0.0006						1042.7		23				1052		16
https://doi.org/10.1016/j.lithos.2020.105585	[0003]	NMC100	24	OROGEN	South Africa	Paulshoek / Namaqua Orogen	Metapelite	Granulite	Spinel-quartz granulite		Metamorphic	LAICPMS													5.76701		0.146337				0.07271		0.0009						1031		24				1004		25
https://doi.org/10.1016/j.lithos.2020.105585	[0003]	NMC100	25	OROGEN	South Africa	Paulshoek / Namaqua Orogen	Metapelite	Granulite	Spinel-quartz granulite		Metamorphic	LAICPMS													5.83431		0.142964				0.07344		0.00078						1019.6		23				1025		21
https://doi.org/10.1016/j.lithos.2020.105585	[0003]	NMC100	26	OROGEN	South Africa	Paulshoek / Namaqua Orogen	Metapelite	Granulite	Spinel-quartz granulite		Metamorphic	LAICPMS													5.8072		0.141639				0.07454		0.00091						1024.3		23				1054		25
https://doi.org/10.1016/j.lithos.2020.105585	[0003]	NMC100	27	OROGEN	South Africa	Paulshoek / Namaqua Orogen	Metapelite	Granulite	Spinel-quartz granulite		Metamorphic	LAICPMS													5.71102		0.140248				0.0722		0.00069						1040		24				997		22
https://doi.org/10.1016/j.lithos.2020.105585	[0003]	NMC100	28	OROGEN	South Africa	Paulshoek / Namaqua Orogen	Metapelite	Granulite	Spinel-quartz granulite		Metamorphic	LAICPMS													5.70776		0.140088				0.07182		0.0009						1041		24				979		26
https://doi.org/10.1016/j.lithos.2020.105585	[0003]	NMC100	29	OROGEN	South Africa	Paulshoek / Namaqua Orogen	Metapelite	Granulite	Spinel-quartz granulite		Metamorphic	LAICPMS													5.76369		0.142846				0.07474		0.00085						1031		24				1060		23
https://doi.org/10.1016/j.lithos.2020.105585	[0003]	NMC100	30	OROGEN	South Africa	Paulshoek / Namaqua Orogen	Metapelite	Granulite	Spinel-quartz granulite		Metamorphic	LAICPMS													5.72738		0.147613				0.0747		0.0011						1038		25				1058		31
https://doi.org/10.1016/j.lithos.2020.105585	[0003]	NMC100	31	OROGEN	South Africa	Paulshoek / Namaqua Orogen	Metapelite	Granulite	Spinel-quartz granulite		Metamorphic	LAICPMS													5.78369		0.153875				0.072		0.001						1028		25				984		28
https://doi.org/10.1016/j.lithos.2020.105585	[0003]	NMC100	32	OROGEN	South Africa	Paulshoek / Namaqua Orogen	Metapelite	Granulite	Spinel-quartz granulite		Metamorphic	LAICPMS													5.58659		0.140445				0.0737		0.0011						1061		25				1031		29
https://doi.org/10.1016/j.lithos.2020.105585	[0003]	NMC100	33	OROGEN	South Africa	Paulshoek / Namaqua Orogen	Metapelite	Granulite	Spinel-quartz granulite		Metamorphic	LAICPMS													5.73066		0.13793				0.0731		0.0007						1036.8		23				1015		19
https://doi.org/10.1016/j.lithos.2020.105585	[0003]	NMC100	34	OROGEN	South Africa	Paulshoek / Namaqua Orogen	Metapelite	Granulite	Spinel-quartz granulite		Metamorphic	LAICPMS													5.59597		0.144048				0.07336		0.00054						1060		25				1023		15
https://doi.org/10.1016/j.lithos.2020.105585	[0003]	NMC100	35	OROGEN	South Africa	Paulshoek / Namaqua Orogen	Metapelite	Granulite	Spinel-quartz granulite		Metamorphic	LAICPMS													5.77367		0.146675				0.07404		0.00067						1030		24				1046		16
https://doi.org/10.1016/j.lithos.2020.105585	[0003]	NMC100	37	OROGEN	South Africa	Paulshoek / Namaqua Orogen	Metapelite	Granulite	Spinel-quartz granulite		Metamorphic	LAICPMS													5.59597		0.137786				0.07311		0.00054						1060		24				1020		16
https://doi.org/10.1016/j.lithos.2020.105585	[0003]	NMC100	38	OROGEN	South Africa	Paulshoek / Namaqua Orogen	Metapelite	Granulite	Spinel-quartz granulite		Metamorphic	LAICPMS													5.73066		0.13793				0.07216		0.00095						1036.9		23				989		27
https://doi.org/10.1016/j.lithos.2020.105585	[0003]	NMC100	39	OROGEN	South Africa	Paulshoek / Namaqua Orogen	Metapelite	Granulite	Spinel-quartz granulite		Metamorphic	LAICPMS													5.91366		0.157371				0.07146		0.00071						1007		25				969		20
https://doi.org/10.1016/j.lithos.2020.105585	[0003]	NMC100	40	OROGEN	South Africa	Paulshoek / Namaqua Orogen	Metapelite	Granulite	Spinel-quartz granulite		Metamorphic	LAICPMS													5.90319		0.14636				0.07299		0.00085						1009		23				1019		26
https://doi.org/10.1016/j.lithos.2020.105585	[0003]	NMC100	41	OROGEN	South Africa	Paulshoek / Namaqua Orogen	Metapelite	Granulite	Spinel-quartz granulite		Metamorphic	LAICPMS													5.60538		0.150817				0.07303		0.0006						1058		26				1018		15
https://doi.org/10.1016/j.lithos.2020.105585	[0003]	NMC100	42	OROGEN	South Africa	Paulshoek / Namaqua Orogen	Metapelite	Granulite	Spinel-quartz granulite		Metamorphic	LAICPMS													5.68828		0.142369				0.07245		0.00073						1044		24				997		20
https://doi.org/10.1016/j.lithos.2020.105585	[0003]	NMC100	43	OROGEN	South Africa	Paulshoek / Namaqua Orogen	Metapelite	Granulite	Spinel-quartz granulite		Metamorphic	LAICPMS													5.67537		0.157828				0.07253		0.00078						1046		27				999		22
https://doi.org/10.1016/j.lithos.2020.105585	[0003]	NMC100	44	OROGEN	South Africa	Paulshoek / Namaqua Orogen	Metapelite	Granulite	Spinel-quartz granulite		Metamorphic	LAICPMS													5.76369		0.136202				0.0731		0.001						1031.4		23				1015		28
https://doi.org/10.1016/j.lithos.2020.105585	[0003]	NMC100	45	OROGEN	South Africa	Paulshoek / Namaqua Orogen	Metapelite	Granulite	Spinel-quartz granulite		Metamorphic	LAICPMS													5.72738		0.134492				0.0732		0.0011						1037.4		22				1016		30
https://doi.org/10.1016/j.lithos.2020.105585	[0003]	NMC100	46	OROGEN	South Africa	Paulshoek / Namaqua Orogen	Metapelite	Granulite	Spinel-quartz granulite		Metamorphic	LAICPMS													5.73395		0.151239				0.0729		0.0013						1036		25				1019		40
https://doi.org/10.1016/j.lithos.2020.105585	[0003]	NMC100	47	OROGEN	South Africa	Paulshoek / Namaqua Orogen	Metapelite	Granulite	Spinel-quartz granulite		Metamorphic	LAICPMS													6.14628		0.245549				0.0734		0.0011						971		36				1023		30
https://doi.org/10.1016/j.lithos.2020.105585	[0003]	NMC100	48	OROGEN	South Africa	Paulshoek / Namaqua Orogen	Metapelite	Granulite	Spinel-quartz granulite		Metamorphic	LAICPMS													5.81058		0.138427				0.07147		0.00089						1023.9		23				969		26
https://doi.org/10.1016/j.lithos.2020.105585	[0003]	NMC100	49	OROGEN	South Africa	Paulshoek / Namaqua Orogen	Metapelite	Granulite	Spinel-quartz granulite		Metamorphic	LAICPMS													5.8548		0.150826				0.0736		0.0011						1016		24				1028		30
https://doi.org/10.1016/j.lithos.2020.105585	[0003]	NMC100	50	OROGEN	South Africa	Paulshoek / Namaqua Orogen	Metapelite	Granulite	Spinel-quartz granulite		Metamorphic	LAICPMS													5.8651		0.141038				0.07165		0.0007						1014.7		23				974		20
https://doi.org/10.1016/j.lithos.2020.105585	[0003]	NMC100	51	OROGEN	South Africa	Paulshoek / Namaqua Orogen	Metapelite	Granulite	Spinel-quartz granulite		Metamorphic	LAICPMS													5.84795		0.143634				0.0734		0.00091						1017.4		23				1023		25
https://doi.org/10.1016/j.lithos.2020.105585	[0003]	NMC100	52	OROGEN	South Africa	Paulshoek / Namaqua Orogen	Metapelite	Granulite	Spinel-quartz granulite		Metamorphic	LAICPMS													5.57414		0.133605				0.0742		0.00073						1063.4		24				1046		20
https://doi.org/10.1016/j.lithos.2020.105585	[0003]	NMC100	53	OROGEN	South Africa	Paulshoek / Namaqua Orogen	Metapelite	Granulite	Spinel-quartz granulite		Metamorphic	LAICPMS													5.83771		0.136316				0.07381		0.00082						1019.3		22				1040		21
https://doi.org/10.1016/j.lithos.2020.105585	[0003]	NMC100	54	OROGEN	South Africa	Paulshoek / Namaqua Orogen	Metapelite	Granulite	Spinel-quartz granulite		Metamorphic	LAICPMS													5.53097		0.137662				0.07334		0.00068						1071		25				1022		19
https://doi.org/10.1016/j.lithos.2020.105585	[0003]	NMC100	55	OROGEN	South Africa	Paulshoek / Namaqua Orogen	Metapelite	Granulite	Spinel-quartz granulite		Metamorphic	LAICPMS													5.97729		0.164349				0.07378		0.00063						997		25				1034		17
https://doi.org/10.1016/j.lithos.2020.105585	[0003]	NMC100	56	OROGEN	South Africa	Paulshoek / Namaqua Orogen	Metapelite	Granulite	Spinel-quartz granulite		Metamorphic	LAICPMS													5.65291		0.143799				0.07356		0.0008						1050		24				1028		22
https://doi.org/10.1016/j.lithos.2020.105585	[0003]	NMC100	57	OROGEN	South Africa	Paulshoek / Namaqua Orogen	Metapelite	Granulite	Spinel-quartz granulite		Metamorphic	LAICPMS													5.83431		0.163388				0.07207		0.00083						1020		27				986		23
https://doi.org/10.1016/j.lithos.2020.105585	[0003]	NMC100	58	OROGEN	South Africa	Paulshoek / Namaqua Orogen	Metapelite	Granulite	Spinel-quartz granulite		Metamorphic	LAICPMS													5.70451		0.136674				0.07334		0.00089						1041		23				1022		25
https://doi.org/10.1016/j.lithos.2020.105585	[0003]	NMC100	59	OROGEN	South Africa	Paulshoek / Namaqua Orogen	Metapelite	Granulite	Spinel-quartz granulite		Metamorphic	LAICPMS													5.58971		0.134353				0.0741		0.00074						1060.7		23				1043		20
https://doi.org/10.1016/j.lithos.2020.105585	[0003]	NMC100	60	OROGEN	South Africa	Paulshoek / Namaqua Orogen	Metapelite	Granulite	Spinel-quartz granulite		Metamorphic	LAICPMS													5.7971		0.164671				0.07177		0.00069						1026		27				978		19
https://doi.org/10.1016/j.lithos.2020.105585	[0003]	NMC100	61	OROGEN	South Africa	Paulshoek / Namaqua Orogen	Metapelite	Granulite	Spinel-quartz granulite		Metamorphic	LAICPMS													5.52792		0.128343				0.07286		0.00063						1071.6		23				1009		17
https://doi.org/10.1016/j.lithos.2020.105585	[0003]	NMC100	62	OROGEN	South Africa	Paulshoek / Namaqua Orogen	Metapelite	Granulite	Spinel-quartz granulite		Metamorphic	LAICPMS													5.54631		0.132275				0.0735		0.00065						1068.4		23				1027		18
https://doi.org/10.1016/j.lithos.2020.105585	[0003]	NMC100	63	OROGEN	South Africa	Paulshoek / Namaqua Orogen	Metapelite	Granulite	Spinel-quartz granulite		Metamorphic	LAICPMS													5.51572		0.142989				0.07477		0.00053						1074		26				1061		14
https://doi.org/10.1016/j.lithos.2020.105585	[0003]	NMC100	64	OROGEN	South Africa	Paulshoek / Namaqua Orogen	Metapelite	Granulite	Spinel-quartz granulite		Metamorphic	LAICPMS													5.69152		0.14901				0.0754		0.0018						1043		26				1075		47
https://doi.org/10.1016/j.lithos.2020.105585	[0003]	NMC100	65	OROGEN	South Africa	Paulshoek / Namaqua Orogen	Metapelite	Granulite	Spinel-quartz granulite		Metamorphic	LAICPMS													5.78369		0.14384				0.07338		0.00094						1028		23				1023		26
https://doi.org/10.1016/j.lithos.2020.105585	[0003]	NMC100	66	OROGEN	South Africa	Paulshoek / Namaqua Orogen	Metapelite	Granulite	Spinel-quartz granulite		Metamorphic	LAICPMS													5.75705		0.159089				0.07264		0.00084						1032		26				1002		23
https://doi.org/10.1016/j.lithos.2020.105585	[0003]	NMC100	68	OROGEN	South Africa	Paulshoek / Namaqua Orogen	Metapelite	Granulite	Spinel-quartz granulite		Metamorphic	LAICPMS													5.8309		0.159797				0.0739		0.0011						1020		26				1035		31
https://doi.org/10.1016/j.lithos.2020.105585	[0003]	NMC100	69	OROGEN	South Africa	Paulshoek / Namaqua Orogen	Metapelite	Granulite	Spinel-quartz granulite		Metamorphic	LAICPMS													5.93472		0.144406				0.07284		0.00054						1003.7		23				1008		15
https://doi.org/10.1016/j.lithos.2020.105585	[0003]	NMC100	70	OROGEN	South Africa	Paulshoek / Namaqua Orogen	Metapelite	Granulite	Spinel-quartz granulite		Metamorphic	LAICPMS													5.87544		0.158796				0.07117		0.00094						1013		26				967		25
https://doi.org/10.1016/j.lithos.2020.105585	[0003]	NMC100	71	OROGEN	South Africa	Paulshoek / Namaqua Orogen	Metapelite	Granulite	Spinel-quartz granulite		Metamorphic	LAICPMS													5.71102		0.163079				0.0738		0.0014						1040		27				1034		39
https://doi.org/10.1016/j.lithos.2020.105585	[0003]	NMC100	72	OROGEN	South Africa	Paulshoek / Namaqua Orogen	Metapelite	Granulite	Spinel-quartz granulite		Metamorphic	LAICPMS													5.75705		0.149146				0.0734		0.0011						1033		25				1023		30
https://doi.org/10.1016/j.lithos.2020.105585	[0003]	NMC100	73	OROGEN	South Africa	Paulshoek / Namaqua Orogen	Metapelite	Granulite	Spinel-quartz granulite		Metamorphic	LAICPMS													5.8651		0.144478				0.07277		0.00082						1015		23				1006		23
https://doi.org/10.1016/j.lithos.2020.105585	[0003]	NMC100	74	OROGEN	South Africa	Paulshoek / Namaqua Orogen	Metapelite	Granulite	Spinel-quartz granulite		Metamorphic	LAICPMS													5.82072		0.162628				0.0728		0.0011						1022		26				1006		30
https://doi.org/10.1016/j.lithos.2020.105585	[0003]	NMC100	75	OROGEN	South Africa	Paulshoek / Namaqua Orogen	Metapelite	Granulite	Spinel-quartz granulite		Metamorphic	LAICPMS													5.82072		0.186344				0.0749		0.0012						1022		30				1064		32
https://doi.org/10.1016/j.lithos.2020.105585	[0003]	NMC100	76	OROGEN	South Africa	Paulshoek / Namaqua Orogen	Metapelite	Granulite	Spinel-quartz granulite		Metamorphic	LAICPMS													5.65291		0.146995				0.07359		0.00058						1050		25				1029		16
https://doi.org/10.1016/j.lithos.2020.105585	[0003]	NMC100	77	OROGEN	South Africa	Paulshoek / Namaqua Orogen	Metapelite	Granulite	Spinel-quartz granulite		Metamorphic	LAICPMS													5.77367		0.150009				0.0714		0.001						1029		25				966		29
https://doi.org/10.1016/j.lithos.2020.105585	[0003]	NMC100	78	OROGEN	South Africa	Paulshoek / Namaqua Orogen	Metapelite	Granulite	Spinel-quartz granulite		Metamorphic	LAICPMS													5.77034		0.163155				0.0723		0.0012						1030		27				992		35
https://doi.org/10.1016/j.lithos.2020.105585	[0003]	NMC100	79	OROGEN	South Africa	Paulshoek / Namaqua Orogen	Metapelite	Granulite	Spinel-quartz granulite		Metamorphic	LAICPMS													5.95593		0.156081				0.073		0.0012						1001		24				1012		32
https://doi.org/10.1016/j.lithos.2020.105585	[0003]	NMC100	80	OROGEN	South Africa	Paulshoek / Namaqua Orogen	Metapelite	Granulite	Spinel-quartz granulite		Metamorphic	LAICPMS													5.79039		0.154231				0.0717		0.00099						1027		26				976		28
https://doi.org/10.1016/j.lithos.2020.105585	[0003]	NMC100	81	OROGEN	South Africa	Paulshoek / Namaqua Orogen	Metapelite	Granulite	Spinel-quartz granulite		Metamorphic	LAICPMS													5.78369		0.147185				0.07184		0.00051						1028		24				980		15
https://doi.org/10.1016/j.lithos.2020.105585	[0003]	NMC100	82	OROGEN	South Africa	Paulshoek / Namaqua Orogen	Metapelite	Granulite	Spinel-quartz granulite		Metamorphic	LAICPMS													5.77367		0.163343				0.0716		0.0011						1030		27				981		28
https://doi.org/10.1016/j.lithos.2020.105585	[0003]	NMC100	83	OROGEN	South Africa	Paulshoek / Namaqua Orogen	Metapelite	Granulite	Spinel-quartz granulite		Metamorphic	LAICPMS													5.69152		0.155488				0.07307		0.00095						1043		26				1014		27
https://doi.org/10.1016/j.lithos.2020.105585	[0003]	NMC100	84	OROGEN	South Africa	Paulshoek / Namaqua Orogen	Metapelite	Granulite	Spinel-quartz granulite		Metamorphic	LAICPMS													5.66251		0.141082				0.0727		0.00085						1048		24				1004		24
https://doi.org/10.1016/j.lithos.2020.105585	[0003]	NMC100	85	OROGEN	South Africa	Paulshoek / Namaqua Orogen	Metapelite	Granulite	Spinel-quartz granulite		Metamorphic	LAICPMS													5.59284		0.147015				0.07268		0.00088						1060		26				1003		25
https://doi.org/10.1016/j.lithos.2020.105585	[0003]	NMC100	86	OROGEN	South Africa	Paulshoek / Namaqua Orogen	Metapelite	Granulite	Spinel-quartz granulite		Metamorphic	LAICPMS													5.84112		0.150122				0.07181		0.00093						1019		24				979		26
https://doi.org/10.1016/j.lithos.2020.105585	[0003]	NMC100	87	OROGEN	South Africa	Paulshoek / Namaqua Orogen	Metapelite	Granulite	Spinel-quartz granulite		Metamorphic	LAICPMS													5.65291		0.159777				0.07304		0.00071						1050		27				1019		21
https://doi.org/10.1016/j.lithos.2020.105585	[0003]	NMC100	88	OROGEN	South Africa	Paulshoek / Namaqua Orogen	Metapelite	Granulite	Spinel-quartz granulite		Metamorphic	LAICPMS													5.72738		0.141052				0.0724		0.00091						1037		24				995		26
https://doi.org/10.1016/j.lithos.2020.105585	[0003]	NMC100	89	OROGEN	South Africa	Paulshoek / Namaqua Orogen	Metapelite	Granulite	Spinel-quartz granulite		Metamorphic	LAICPMS													5.51268		0.148909				0.07324		0.00063						1075		27				1019		17
https://doi.org/10.1016/j.lithos.2020.105585	[0003]	NMC100	90	OROGEN	South Africa	Paulshoek / Namaqua Orogen	Metapelite	Granulite	Spinel-quartz granulite		Metamorphic	LAICPMS													5.59284		0.134503				0.07431		0.00077						1060.2		24				1048		21
https://doi.org/10.1016/j.lithos.2020.105585	[0003]	NMC100	92	OROGEN	South Africa	Paulshoek / Namaqua Orogen	Metapelite	Granulite	Spinel-quartz granulite		Metamorphic	LAICPMS													5.70776		0.149861				0.0735		0.0012						1041		25				1034		29
https://doi.org/10.1016/j.lithos.2020.105585	[0003]	NMC100	93	OROGEN	South Africa	Paulshoek / Namaqua Orogen	Metapelite	Granulite	Spinel-quartz granulite		Metamorphic	LAICPMS													5.76369		0.146169				0.0723		0.00048						1031		24				993		14
https://doi.org/10.1016/j.lithos.2020.105585	[0003]	NMC100	94	OROGEN	South Africa	Paulshoek / Namaqua Orogen	Metapelite	Granulite	Spinel-quartz granulite		Metamorphic	LAICPMS													5.7241		0.137614				0.07128		0.00097						1037.7		23				964		28
https://doi.org/10.1016/j.lithos.2020.105585	[0003]	NMC100	95	OROGEN	South Africa	Paulshoek / Namaqua Orogen	Metapelite	Granulite	Spinel-quartz granulite		Metamorphic	LAICPMS													5.82751		0.139235				0.0728		0.001						1020.7		22				1007		29
https://doi.org/10.1016/j.lithos.2020.105585	[0003]	NMC100	96	OROGEN	South Africa	Paulshoek / Namaqua Orogen	Metapelite	Granulite	Spinel-quartz granulite		Metamorphic	LAICPMS													5.69801		0.15909				0.0745		0.0013						1042		27				1054		35
https://doi.org/10.1016/j.lithos.2020.105585	[0003]	NMC100	97	OROGEN	South Africa	Paulshoek / Namaqua Orogen	Metapelite	Granulite	Spinel-quartz granulite		Metamorphic	LAICPMS													5.56173		0.136105				0.0737		0.00047						1065.7		24				1032		13
https://doi.org/10.1016/j.lithos.2020.105585	[0003]	NMC100	98	OROGEN	South Africa	Paulshoek / Namaqua Orogen	Metapelite	Granulite	Spinel-quartz granulite		Metamorphic	LAICPMS													5.70125		0.159271				0.0726		0.0012						1042		27				1001		35
https://doi.org/10.1016/j.lithos.2020.105585	[0003]	NMC100	99	OROGEN	South Africa	Paulshoek / Namaqua Orogen	Metapelite	Granulite	Spinel-quartz granulite		Metamorphic	LAICPMS													5.57724		0.136865				0.07382		0.00056						1062.9		24				1035		15
https://doi.org/10.1016/j.lithos.2020.105585	[0003]	NMC100	100	OROGEN	South Africa	Paulshoek / Namaqua Orogen	Metapelite	Granulite	Spinel-quartz granulite		Metamorphic	LAICPMS													5.74053		0.168064				0.07382		0.00091						1035		28				1035		25
https://doi.org/10.1016/j.lithos.2020.105585	[0003]	NMC100	101	OROGEN	South Africa	Paulshoek / Namaqua Orogen	Metapelite	Granulite	Spinel-quartz granulite		Metamorphic	LAICPMS													5.65291		0.15019				0.07294		0.00091						1050		26				1011		25
https://doi.org/10.1016/j.lithos.2020.105585	[0003]	NMC100	102	OROGEN	South Africa	Paulshoek / Namaqua Orogen	Metapelite	Granulite	Spinel-quartz granulite		Metamorphic	LAICPMS													5.55556		0.138889				0.07585		0.0007						1067		24				1090		18
https://doi.org/10.1016/j.lithos.2020.105585	[0003]	NMC100	103	OROGEN	South Africa	Paulshoek / Namaqua Orogen	Metapelite	Granulite	Spinel-quartz granulite		Metamorphic	LAICPMS													5.78369		0.140494				0.07408		0.00075						1027.8		23				1042		20
https://doi.org/10.1016/j.epsl.2020.116375	[0004]	05G-062	05G-062-m14 core1	OROGEN	Canada	Grease River shear zone / Athabasca granulite Terrane	Felsic granulite	Granulite	Peraluminous felsic granulite		Metamorphic	EMPA		6.34	0.43	0.69	1965		10.1
https://doi.org/10.1016/j.epsl.2020.116375	[0004]	05G-062	05G-062-m19 core	OROGEN	Canada	Grease River shear zone / Athabasca granulite Terrane	Felsic granulite	Granulite	Peraluminous felsic granulite		Metamorphic	EMPA		5.12	0.4	0.58	1967		12.5
https://doi.org/10.1016/j.epsl.2020.116375	[0004]	05G-062	05G-062-YZ-m5 core	OROGEN	Canada	Grease River shear zone / Athabasca granulite Terrane	Felsic granulite	Granulite	Peraluminous felsic granulite		Metamorphic	EMPA		5.19	0.38	0.57	1948		6.8
https://doi.org/10.1016/j.epsl.2020.116375	[0004]	05G-062	05G-062-YZ-m11 core	OROGEN	Canada	Grease River shear zone / Athabasca granulite Terrane	Felsic granulite	Granulite	Peraluminous felsic granulite		Metamorphic	EMPA		6.07	0.66	0.74	1959		12.5
https://doi.org/10.1016/j.epsl.2020.116375	[0004]	05G-062	05G-062-YZ-m15 core	OROGEN	Canada	Grease River shear zone / Athabasca granulite Terrane	Felsic granulite	Granulite	Peraluminous felsic granulite		Metamorphic	EMPA		6.79	0.46	0.73	1950		5.6
https://doi.org/10.1016/j.epsl.2020.116375	[0004]	05G-062	05G-062-YZ-m3a core	OROGEN	Canada	Grease River shear zone / Athabasca granulite Terrane	Felsic granulite	Granulite	Peraluminous felsic granulite		Metamorphic	EMPA		5.92	0.52	0.68	1963		9.1
https://doi.org/10.1016/j.epsl.2020.116375	[0004]	05G-062	05G-062-YZ-m3b core	OROGEN	Canada	Grease River shear zone / Athabasca granulite Terrane	Felsic granulite	Granulite	Peraluminous felsic granulite		Metamorphic	EMPA		3.9	0.43	0.47	1948		12.5
https://doi.org/10.1016/j.epsl.2020.116375	[0004]	05G-062	05G-062-m14 core2	OROGEN	Canada	Grease River shear zone / Athabasca granulite Terrane	Felsic granulite	Granulite	Peraluminous felsic granulite		Metamorphic	EMPA		4.74	0.78	0.66	1954		19.5
https://doi.org/10.1016/j.epsl.2020.116375	[0004]	05G-062	05G-062-YZ-m13 core 1	OROGEN	Canada	Grease River shear zone / Athabasca granulite Terrane	Felsic granulite	Granulite	Peraluminous felsic granulite		Metamorphic	EMPA		9.04	0.26	0.85	1936		14.3
https://doi.org/10.1016/j.epsl.2020.116375	[0004]	05G-062	05G-062-YZ-m14 core	OROGEN	Canada	Grease River shear zone / Athabasca granulite Terrane	Felsic granulite	Granulite	Peraluminous felsic granulite		Metamorphic	EMPA		9.01	0.21	0.82	1906		16.5
https://doi.org/10.1016/j.epsl.2020.116375	[0004]	05G-062	05G-062-YZ-m4 rim	OROGEN	Canada	Grease River shear zone / Athabasca granulite Terrane	Felsic granulite	Granulite	Peraluminous felsic granulite		Metamorphic	EMPA		8.61	0.16	0.78	1928		13.1
https://doi.org/10.1016/j.epsl.2020.116375	[0004]	05G-062	05G-062-m23 core	OROGEN	Canada	Grease River shear zone / Athabasca granulite Terrane	Felsic granulite	Granulite	Peraluminous felsic granulite		Metamorphic	EMPA		12.49	0.28	1.14	1916		13.3
https://doi.org/10.1016/j.epsl.2020.116375	[0004]	05G-062	05G-062-m21 core	OROGEN	Canada	Grease River shear zone / Athabasca granulite Terrane	Felsic granulite	Granulite	Peraluminous felsic granulite		Metamorphic	EMPA		13.2	0.3	1.22	1931		29
https://doi.org/10.1016/j.epsl.2020.116375	[0004]	05G-062	05G-062-m20 core	OROGEN	Canada	Grease River shear zone / Athabasca granulite Terrane	Felsic granulite	Granulite	Peraluminous felsic granulite		Metamorphic	EMPA		13.13	0.16	1.14	1891		13.9
https://doi.org/10.1016/j.epsl.2020.116375	[0004]	05G-062	05G-062-m14 hi Th core	OROGEN	Canada	Grease River shear zone / Athabasca granulite Terrane	Felsic granulite	Granulite	Peraluminous felsic granulite		Metamorphic	EMPA		17.58	0.14	1.52	1902		16.7
https://doi.org/10.1016/j.epsl.2020.116375	[0004]	05G-062	05G-062-YZ-m3 bridge	OROGEN	Canada	Grease River shear zone / Athabasca granulite Terrane	Felsic granulite	Granulite	Peraluminous felsic granulite		Metamorphic	EMPA		11.76	0.24	1.07	1926		37.2
https://doi.org/10.1016/j.epsl.2020.116375	[0004]	05G-062	05G-062-YZ-m4 core	OROGEN	Canada	Grease River shear zone / Athabasca granulite Terrane	Felsic granulite	Granulite	Peraluminous felsic granulite		Metamorphic	EMPA		14.7	0.19	1.29	1900		25.4
https://doi.org/10.1016/j.epsl.2020.116375	[0004]	05G-062	05G-062-YZ-m13 core 2	OROGEN	Canada	Grease River shear zone / Athabasca granulite Terrane	Felsic granulite	Granulite	Peraluminous felsic granulite		Metamorphic	EMPA		17.88	0.2	1.59	1934		8.7
https://doi.org/10.1016/j.epsl.2020.116375	[0004]	05G-062	05G-062-YZ-m2 core	OROGEN	Canada	Grease River shear zone / Athabasca granulite Terrane	Felsic granulite	Granulite	Peraluminous felsic granulite		Metamorphic	EMPA		14.01	0.27	1.29	1940		5
https://doi.org/10.1016/j.epsl.2020.116375	[0004]	05G-062	05G-062-YZ-m1 core	OROGEN	Canada	Grease River shear zone / Athabasca granulite Terrane	Felsic granulite	Granulite	Peraluminous felsic granulite		Metamorphic	EMPA		13.02	0.25	1.18	1916		27.6
https://doi.org/10.1016/j.epsl.2020.116375	[0004]	014V-024	014V-024-m3 core	OROGEN	Canada	Grease River shear zone / Athabasca granulite Terrane	Felsic granulite	Granulite	Peraluminous felsic granulite		Metamorphic	EMPA		6.58	0.35	0.67	1928		9.7
https://doi.org/10.1016/j.epsl.2020.116375	[0004]	014V-024	014V-024-m1 core	OROGEN	Canada	Grease River shear zone / Athabasca granulite Terrane	Felsic granulite	Granulite	Peraluminous felsic granulite		Metamorphic	EMPA		4.9	0.28	0.51	1937		5
https://doi.org/10.1016/j.epsl.2020.116375	[0004]	014V-024	014V-024-m9 core	OROGEN	Canada	Grease River shear zone / Athabasca granulite Terrane	Felsic granulite	Granulite	Peraluminous felsic granulite		Metamorphic	EMPA		7.55	0.23	0.72	1929		20.5
https://doi.org/10.1016/j.epsl.2020.116375	[0004]	014V-024	014V-024-m4 core	OROGEN	Canada	Grease River shear zone / Athabasca granulite Terrane	Felsic granulite	Granulite	Peraluminous felsic granulite		Metamorphic	EMPA		7.01	0.31	0.7	1937		9.9
https://doi.org/10.1016/j.epsl.2020.116375	[0004]	014V-024	014V-024-m16 core2	OROGEN	Canada	Grease River shear zone / Athabasca granulite Terrane	Felsic granulite	Granulite	Peraluminous felsic granulite		Metamorphic	EMPA		6.25	0.29	0.62	1922		12.3
https://doi.org/10.1016/j.epsl.2020.116375	[0004]	014V-024	014V-m7 left grain	OROGEN	Canada	Grease River shear zone / Athabasca granulite Terrane	Felsic granulite	Granulite	Peraluminous felsic granulite		Metamorphic	EMPA		5.21	0.26	0.53	1935		22.3
https://doi.org/10.1016/j.epsl.2020.116375	[0004]	014V-024	014V-m2 core	OROGEN	Canada	Grease River shear zone / Athabasca granulite Terrane	Felsic granulite	Granulite	Peraluminous felsic granulite		Metamorphic	EMPA		9.35	0.07	0.81	1907		9.1
https://doi.org/10.1016/j.epsl.2020.116375	[0004]	014V-024	014V-m6 right	OROGEN	Canada	Grease River shear zone / Athabasca granulite Terrane	Felsic granulite	Granulite	Peraluminous felsic granulite		Metamorphic	EMPA		9.09	0.08	0.79	1918		4.2
https://doi.org/10.1016/j.epsl.2020.116375	[0004]	014V-024	014V-024-m5 core	OROGEN	Canada	Grease River shear zone / Athabasca granulite Terrane	Felsic granulite	Granulite	Peraluminous felsic granulite		Metamorphic	EMPA		6.31	0.38	0.67	1964		3.4
https://doi.org/10.1016/j.epsl.2020.116375	[0004]	014V-024	014V-024-m16 core	OROGEN	Canada	Grease River shear zone / Athabasca granulite Terrane	Felsic granulite	Granulite	Peraluminous felsic granulite		Metamorphic	EMPA		10.51	0.06	0.89	1895		11.5
https://doi.org/10.1016/j.epsl.2020.116375	[0004]	014V-024	14V-024-m12	OROGEN	Canada	Grease River shear zone / Athabasca granulite Terrane	Felsic granulite	Granulite	Peraluminous felsic granulite		Metamorphic	EMPA		10.78	0.09	0.94	1918		9.1
https://doi.org/10.1016/j.epsl.2020.116375	[0004]	014V-024	014V-024-m9 rim	OROGEN	Canada	Grease River shear zone / Athabasca granulite Terrane	Felsic granulite	Granulite	Peraluminous felsic granulite		Metamorphic	EMPA		11.64	0.09	1.02	1932		22.9
https://doi.org/10.1016/j.epsl.2020.116375	[0004]	014V-024	014V-024-m5 rim1	OROGEN	Canada	Grease River shear zone / Athabasca granulite Terrane	Felsic granulite	Granulite	Peraluminous felsic granulite		Metamorphic	EMPA		10.22	0.1	0.9	1915		21.1
https://doi.org/10.1016/j.epsl.2020.116375	[0004]	014V-024	014V-024-m1 core2	OROGEN	Canada	Grease River shear zone / Athabasca granulite Terrane	Felsic granulite	Granulite	Peraluminous felsic granulite		Metamorphic	EMPA		10.85	0.09	0.94	1899		21.3
https://doi.org/10.1016/j.epsl.2020.116375	[0004]	014V-024	014V-024-m15 core	OROGEN	Canada	Grease River shear zone / Athabasca granulite Terrane	Felsic granulite	Granulite	Peraluminous felsic granulite		Metamorphic	EMPA		13.87	0.09	1.2	1909		27.8
https://doi.org/10.1016/j.epsl.2020.116375	[0004]	014V-024	014V-024-m6 left redo	OROGEN	Canada	Grease River shear zone / Athabasca granulite Terrane	Felsic granulite	Granulite	Peraluminous felsic granulite		Metamorphic	EMPA		10.47	0.16	0.93	1907		7.4
https://doi.org/10.1016/j.epsl.2020.116375	[0004]	14V-034	14V-034-m14 core	OROGEN	Canada	Grease River shear zone / Athabasca granulite Terrane	Felsic granulite	Granulite	Peraluminous felsic granulite		Metamorphic	EMPA		2.7	0.28	0.33	1958		26.4
https://doi.org/10.1016/j.epsl.2020.116375	[0004]	14V-034	14V-034-m6 core	OROGEN	Canada	Grease River shear zone / Athabasca granulite Terrane	Felsic granulite	Granulite	Peraluminous felsic granulite		Metamorphic	EMPA		8.19	0.34	0.83	1979		7.2
https://doi.org/10.1016/j.epsl.2020.116375	[0004]	14V-034	14V-034-m15 core 2	OROGEN	Canada	Grease River shear zone / Athabasca granulite Terrane	Felsic granulite	Granulite	Peraluminous felsic granulite		Metamorphic	EMPA		4.39	0.28	0.47	1961		8.3
https://doi.org/10.1016/j.epsl.2020.116375	[0004]	14V-034	14V-034-m13 core	OROGEN	Canada	Grease River shear zone / Athabasca granulite Terrane	Felsic granulite	Granulite	Peraluminous felsic granulite		Metamorphic	EMPA		2.07	0.26	0.26	1920		14.7
https://doi.org/10.1016/j.epsl.2020.116375	[0004]	14V-034	14V-034-m4 core	OROGEN	Canada	Grease River shear zone / Athabasca granulite Terrane	Felsic granulite	Granulite	Peraluminous felsic granulite		Metamorphic	EMPA		7.6	0.13	0.69	1935		11.3
https://doi.org/10.1016/j.epsl.2020.116375	[0004]	14V-034	14V-034-m6 rim	OROGEN	Canada	Grease River shear zone / Athabasca granulite Terrane	Felsic granulite	Granulite	Peraluminous felsic granulite		Metamorphic	EMPA		3.21	0.13	0.31	1902		18.5
https://doi.org/10.1016/j.epsl.2020.116375	[0004]	14V-034	14V-034-m5 rim	OROGEN	Canada	Grease River shear zone / Athabasca granulite Terrane	Felsic granulite	Granulite	Peraluminous felsic granulite		Metamorphic	EMPA		3.39	0.15	0.33	1911		16.1
https://doi.org/10.1016/j.epsl.2020.116375	[0004]	14V-034	14V-034-m4 rim	OROGEN	Canada	Grease River shear zone / Athabasca granulite Terrane	Felsic granulite	Granulite	Peraluminous felsic granulite		Metamorphic	EMPA		6.92	0.13	0.62	1910		11.3
https://doi.org/10.1016/j.epsl.2020.116375	[0004]	14V-034	14V-034-m8 core	OROGEN	Canada	Grease River shear zone / Athabasca granulite Terrane	Felsic granulite	Granulite	Peraluminous felsic granulite		Metamorphic	EMPA		10.3	0.16	0.92	1920		3.4
https://doi.org/10.1016/j.epsl.2020.116375	[0004]	14V-034	14V-034-m5 core	OROGEN	Canada	Grease River shear zone / Athabasca granulite Terrane	Felsic granulite	Granulite	Peraluminous felsic granulite		Metamorphic	EMPA		9.97	0.14	0.89	1918		14.1
https://doi.org/10.1016/j.epsl.2020.116375	[0004]	14V-034	14V-030A-m2 core	OROGEN	Canada	Grease River shear zone / Athabasca granulite Terrane	Felsic granulite	Granulite	Peraluminous felsic granulite		Metamorphic	EMPA		7.73	0.06	0.69	1951		9.9
https://doi.org/10.1016/j.epsl.2020.116375	[0004]	14V-034	14V-030A-m10 core	OROGEN	Canada	Grease River shear zone / Athabasca granulite Terrane	Felsic granulite	Granulite	Peraluminous felsic granulite		Metamorphic	EMPA		6.79	0.06	0.6	1932		8.3
https://doi.org/10.1016/j.epsl.2020.116375	[0004]	14V-034	14V-030A-m15 core	OROGEN	Canada	Grease River shear zone / Athabasca granulite Terrane	Felsic granulite	Granulite	Peraluminous felsic granulite		Metamorphic	EMPA		7.2	0.09	0.64	1935		18.1
https://doi.org/10.1016/j.epsl.2020.116375	[0004]	14V-034	14V-030A-14V-024-m1 core	OROGEN	Canada	Grease River shear zone / Athabasca granulite Terrane	Felsic granulite	Granulite	Peraluminous felsic granulite		Metamorphic	EMPA		9.54	0.12	0.87	1959		7.4
https://doi.org/10.1016/j.epsl.2020.116375	[0004]	14V-034	14V-030A-m8 core 2	OROGEN	Canada	Grease River shear zone / Athabasca granulite Terrane	Felsic granulite	Granulite	Peraluminous felsic granulite		Metamorphic	EMPA		9.85	0.1	0.85	1898		10.5
https://doi.org/10.1016/j.epsl.2020.116375	[0004]	14V-034	14V-030A-m3 core	OROGEN	Canada	Grease River shear zone / Athabasca granulite Terrane	Felsic granulite	Granulite	Peraluminous felsic granulite		Metamorphic	EMPA		8.34	0.09	0.73	1915		13.9
https://doi.org/10.1016/j.epsl.2020.116375	[0004]	14V-034	14V-030A-m11 core	OROGEN	Canada	Grease River shear zone / Athabasca granulite Terrane	Felsic granulite	Granulite	Peraluminous felsic granulite		Metamorphic	EMPA		8.57	0.13	0.76	1917		8.5
https://doi.org/10.1016/j.epsl.2020.116375	[0004]	14V-034	14V-030A-m14 core	OROGEN	Canada	Grease River shear zone / Athabasca granulite Terrane	Felsic granulite	Granulite	Peraluminous felsic granulite		Metamorphic	EMPA		7.14	0.07	0.63	1930		14.7
https://doi.org/10.1016/j.epsl.2020.116375	[0004]	14V-034	14V-030A-m8 rim 2	OROGEN	Canada	Grease River shear zone / Athabasca granulite Terrane	Felsic granulite	Granulite	Peraluminous felsic granulite		Metamorphic	EMPA		8.28	0.05	0.71	1895		9.3
https://doi.org/10.1016/j.epsl.2020.116375	[0004]	14V-034	14V-030A-m2 rim	OROGEN	Canada	Grease River shear zone / Athabasca granulite Terrane	Felsic granulite	Granulite	Peraluminous felsic granulite		Metamorphic	EMPA		12.11	0.19	1.1	1946		25
https://doi.org/10.1016/j.epsl.2020.116375	[0004]	14V-034	14V-030A-m11 rim	OROGEN	Canada	Grease River shear zone / Athabasca granulite Terrane	Felsic granulite	Granulite	Peraluminous felsic granulite		Metamorphic	EMPA		15.1	0.13	1.31	1908		12.1
https://doi.org/10.1016/j.epsl.2020.116375	[0004]	14V-034	14V-030A-m14 rim	OROGEN	Canada	Grease River shear zone / Athabasca granulite Terrane	Felsic granulite	Granulite	Peraluminous felsic granulite		Metamorphic	EMPA		14.66	0.11	1.27	1912		5.6
https://doi.org/10.1016/j.epsl.2020.116375	[0004]	14V-034	14V-030A-m4 core	OROGEN	Canada	Grease River shear zone / Athabasca granulite Terrane	Felsic granulite	Granulite	Peraluminous felsic granulite		Metamorphic	EMPA		10.01	0.1	0.88	1916		7.2
https://doi.org/10.1016/j.epsl.2020.116375	[0004]	14V-034	14V-030A-m1 rim	OROGEN	Canada	Grease River shear zone / Athabasca granulite Terrane	Felsic granulite	Granulite	Peraluminous felsic granulite		Metamorphic	EMPA		11.54	0.11	1	1905		16.3
https://doi.org/10.1016/j.epsl.2020.116375	[0004]	04G_029B	04G-029B-m6 core	OROGEN	Canada	Grease River shear zone / Athabasca granulite Terrane	Felsic granulite	Granulite	Peraluminous felsic granulite		Metamorphic	EMPA		4.41	0.09	0.41	1951		19.5
https://doi.org/10.1016/j.epsl.2020.116375	[0004]	04G_029B	04G-029B-m3 core	OROGEN	Canada	Grease River shear zone / Athabasca granulite Terrane	Felsic granulite	Granulite	Peraluminous felsic granulite		Metamorphic	EMPA		6.32	0.08	0.57	1948		15.5
https://doi.org/10.1016/j.epsl.2020.116375	[0004]	04G_029B	04G-029B-m9 rim RT	OROGEN	Canada	Grease River shear zone / Athabasca granulite Terrane	Felsic granulite	Granulite	Peraluminous felsic granulite		Metamorphic	EMPA		9.54	0.08	0.83	1903		3
https://doi.org/10.1016/j.epsl.2020.116375	[0004]	04G_029B	04G-029B-m8 rim LT	OROGEN	Canada	Grease River shear zone / Athabasca granulite Terrane	Felsic granulite	Granulite	Peraluminous felsic granulite		Metamorphic	EMPA		10.65	0.11	0.93	1901		5.6
https://doi.org/10.1016/j.epsl.2020.116375	[0004]	04G_029B	04G-029B-m9 rim LT	OROGEN	Canada	Grease River shear zone / Athabasca granulite Terrane	Felsic granulite	Granulite	Peraluminous felsic granulite		Metamorphic	EMPA		8.51	0.14	0.76	1901		28
https://doi.org/10.1016/j.epsl.2020.116375	[0004]	04G_029B	04G-029B-m3 rim RT	OROGEN	Canada	Grease River shear zone / Athabasca granulite Terrane	Felsic granulite	Granulite	Peraluminous felsic granulite		Metamorphic	EMPA		11.61	0.08	1	1899		16.7
https://doi.org/10.1016/j.epsl.2020.116375	[0004]	04G_029B	04G-029B-m8 RT rim	OROGEN	Canada	Grease River shear zone / Athabasca granulite Terrane	Felsic granulite	Granulite	Peraluminous felsic granulite		Metamorphic	EMPA		10.58	0.11	0.92	1907		9.5
https://doi.org/10.1016/j.epsl.2020.116375	[0004]	04G_029B	04G-029B-m3 rim LT v2	OROGEN	Canada	Grease River shear zone / Athabasca granulite Terrane	Felsic granulite	Granulite	Peraluminous felsic granulite		Metamorphic	EMPA		12.27	0.08	1.06	1910		18.9
https://doi.org/10.1016/j.epsl.2020.116375	[0004]	04G_029B	04G-029B-m6 low Th LT rim	OROGEN	Canada	Grease River shear zone / Athabasca granulite Terrane	Felsic granulite	Granulite	Peraluminous felsic granulite		Metamorphic	EMPA		13.33	0.09	1.14	1901		26.6
https://doi.org/10.1016/j.epsl.2020.116375	[0004]	04G_029B	04G-029B-m6 low Ca RT rim-v2	OROGEN	Canada	Grease River shear zone / Athabasca granulite Terrane	Felsic granulite	Granulite	Peraluminous felsic granulite		Metamorphic	EMPA		16.98	0.12	1.47	1908		35.4
https://doi.org/10.1016/j.epsl.2020.116375	[0004]	04G_029B	04G-029B-m8 core	OROGEN	Canada	Grease River shear zone / Athabasca granulite Terrane	Felsic granulite	Granulite	Peraluminous felsic granulite		Metamorphic	EMPA		17.49	0.11	1.52	1920		12.3
https://doi.org/10.1016/j.epsl.2020.116375	[0004]	04G_029B	04G-029B-m3 core2	OROGEN	Canada	Grease River shear zone / Athabasca granulite Terrane	Felsic granulite	Granulite	Peraluminous felsic granulite		Metamorphic	EMPA		13.25	0.09	1.16	1939		2.6
https://doi.org/10.1016/j.epsl.2020.116375	[0004]	04G_029B	04G-029B-m9 core	OROGEN	Canada	Grease River shear zone / Athabasca granulite Terrane	Felsic granulite	Granulite	Peraluminous felsic granulite		Metamorphic	EMPA		7.16	0.07	0.63	1911		15.3
https://doi.org/10.1016/j.epsl.2020.116375	[0004]	04G_029B	04G-029B-m6 hi Th core	OROGEN	Canada	Grease River shear zone / Athabasca granulite Terrane	Felsic granulite	Granulite	Peraluminous felsic granulite		Metamorphic	EMPA		16.16	0.1	1.4	1926		10.7
https://doi.org/10.1016/j.epsl.2020.116375	[0004]	04G_029B	04G-029B-m1 hi Th rim	OROGEN	Canada	Grease River shear zone / Athabasca granulite Terrane	Felsic granulite	Granulite	Peraluminous felsic granulite		Metamorphic	EMPA		17.07	0.12	1.46	1899		17.7
https://doi.org/10.1016/j.epsl.2020.116375	[0004]	04G_029B	04G-029B-m9 Y left rim-v2	OROGEN	Canada	Grease River shear zone / Athabasca granulite Terrane	Felsic granulite	Granulite	Peraluminous felsic granulite		Metamorphic	EMPA		3.79	0.04	0.32	1850		18.5
https://doi.org/10.1016/j.epsl.2020.116375	[0004]	04G_029B	04G-029B-m10 Rt Y rim	OROGEN	Canada	Grease River shear zone / Athabasca granulite Terrane	Felsic granulite	Granulite	Peraluminous felsic granulite		Metamorphic	EMPA		5.13	0.06	0.43	1835		10.1
https://doi.org/10.1016/j.epsl.2020.116375	[0004]	04G050B	04G050B-m1 NE rim-01-22-2007	OROGEN	Canada	Grease River shear zone / Athabasca granulite Terrane	Felsic granulite	Granulite	Peraluminous felsic granulite		Metamorphic	EMPA		8.15	0.41	0.69	1907		15.9
https://doi.org/10.1016/j.epsl.2020.116375	[0004]	04G050B	04G050B-m1NW-12-16-2006	OROGEN	Canada	Grease River shear zone / Athabasca granulite Terrane	Felsic granulite	Granulite	Peraluminous felsic granulite		Metamorphic	EMPA		10.23	0.54	1.24	2588		9.1
https://doi.org/10.1016/j.epsl.2020.116375	[0004]	04G050B	04G050B-m1SE-12-16-2006	OROGEN	Canada	Grease River shear zone / Athabasca granulite Terrane	Felsic granulite	Granulite	Peraluminous felsic granulite		Metamorphic	EMPA		13.49	0.5	1.53	2595		8.5
https://doi.org/10.1016/j.epsl.2020.116375	[0004]	04G050B	04G050B-m3-Core-12-16-2006	OROGEN	Canada	Grease River shear zone / Athabasca granulite Terrane	Felsic granulite	Granulite	Peraluminous felsic granulite		Metamorphic	EMPA		5.05	0.47	0.71	2597		6.4
https://doi.org/10.1016/j.epsl.2020.116375	[0004]	04G050B	04G050B-m3-Rim-12-17-2006	OROGEN	Canada	Grease River shear zone / Athabasca granulite Terrane	Felsic granulite	Granulite	Peraluminous felsic granulite		Metamorphic	EMPA		9.42	0.28	1.03	2584		8.5
https://doi.org/10.1016/j.epsl.2020.116375	[0004]	04G050B	04G050B-m4-Rim-12-17-2006	OROGEN	Canada	Grease River shear zone / Athabasca granulite Terrane	Felsic granulite	Granulite	Peraluminous felsic granulite		Metamorphic	EMPA		8.41	0.71	1.14	2582		29.4
https://doi.org/10.1016/j.epsl.2020.116375	[0004]	04G050B	04G050B-m5-core-12-18-2006	OROGEN	Canada	Grease River shear zone / Athabasca granulite Terrane	Felsic granulite	Granulite	Peraluminous felsic granulite		Metamorphic	EMPA		9.57	0.35	1.09	2601		14.1
https://doi.org/10.1016/j.epsl.2020.116375	[0004]	04G050B	04G050B-m7-HiYring-12-18-2006	OROGEN	Canada	Grease River shear zone / Athabasca granulite Terrane	Felsic granulite	Granulite	Peraluminous felsic granulite		Metamorphic	EMPA		4.68	0.48	0.68	2616		11.1
https://doi.org/10.1016/j.epsl.2020.116375	[0004]	04G050B	04G050B-m7-Core-12-16-2006	OROGEN	Canada	Grease River shear zone / Athabasca granulite Terrane	Felsic granulite	Granulite	Peraluminous felsic granulite		Metamorphic	EMPA		11	0.31	1.21	2606		7.7
https://doi.org/10.1016/j.epsl.2020.116375	[0004]	04G050B	04G050B-m7-Rim-12-17-2006	OROGEN	Canada	Grease River shear zone / Athabasca granulite Terrane	Felsic granulite	Granulite	Peraluminous felsic granulite		Metamorphic	EMPA		8.83	0.61	1.14	2604		11.9
https://doi.org/10.1016/j.epsl.2020.116375	[0004]	04G050B	04G050B-m9 core 02-02-2007	OROGEN	Canada	Grease River shear zone / Athabasca granulite Terrane	Felsic granulite	Granulite	Peraluminous felsic granulite		Metamorphic	EMPA		11.15	0.29	1.2	2582		21.9
https://doi.org/10.1016/j.epsl.2020.116375	[0004]	04G050B	04G050B-m10 core 02-02-2007	OROGEN	Canada	Grease River shear zone / Athabasca granulite Terrane	Felsic granulite	Granulite	Peraluminous felsic granulite		Metamorphic	EMPA		7.83	0.65	1.07	2609		14.5
https://doi.org/10.1016/j.epsl.2020.116375	[0004]	04G050B	04G050B-m10-Wrim-12-18-2006	OROGEN	Canada	Grease River shear zone / Athabasca granulite Terrane	Felsic granulite	Granulite	Peraluminous felsic granulite		Metamorphic	EMPA		9.51	0.36	1.08	2580		15.3
https://doi.org/10.1016/j.epsl.2020.116375	[0004]	04G050B	04G050B-m11-Core-12-16-2006	OROGEN	Canada	Grease River shear zone / Athabasca granulite Terrane	Felsic granulite	Granulite	Peraluminous felsic granulite		Metamorphic	EMPA		10.58	0.31	1.13	2540		40.3
https://doi.org/10.1016/j.epsl.2020.116375	[0004]	04G050B	04G050B-m11-Mid-12-17-2006	OROGEN	Canada	Grease River shear zone / Athabasca granulite Terrane	Felsic granulite	Granulite	Peraluminous felsic granulite		Metamorphic	EMPA		15.04	0.38	1.57	2519		42.9
https://doi.org/10.1016/j.epsl.2020.116375	[0004]	04G050B	04G050B-m11-Etip-12-18-2006	OROGEN	Canada	Grease River shear zone / Athabasca granulite Terrane	Felsic granulite	Granulite	Peraluminous felsic granulite		Metamorphic	EMPA		10.77	0.4	0.86	1893		16.3
https://doi.org/10.1016/j.epsl.2020.116375	[0004]	04G050B	04G050B-m13 core-01-21-2007	OROGEN	Canada	Grease River shear zone / Athabasca granulite Terrane	Felsic granulite	Granulite	Peraluminous felsic granulite		Metamorphic	EMPA		10.36	0.39	1.19	2609		5.6
https://doi.org/10.1016/j.epsl.2020.116375	[0004]	04G050B	04G050B-m13 outer core-01-22-2007	OROGEN	Canada	Grease River shear zone / Athabasca granulite Terrane	Felsic granulite	Granulite	Peraluminous felsic granulite		Metamorphic	EMPA		10.45	0.37	1.19	2614		7
https://doi.org/10.1016/j.epsl.2020.116375	[0004]	04G050B	04G050B-m13 rim NE-01-29-2007	OROGEN	Canada	Grease River shear zone / Athabasca granulite Terrane	Felsic granulite	Granulite	Peraluminous felsic granulite		Metamorphic	EMPA		10.66	0.36	0.86	1914		12.3
https://doi.org/10.1016/j.epsl.2020.116375	[0004]	04G050B	04G050B-m14 core-01-21-2007	OROGEN	Canada	Grease River shear zone / Athabasca granulite Terrane	Felsic granulite	Granulite	Peraluminous felsic granulite		Metamorphic	EMPA		12.12	0.42	1.34	2559		28.6
https://doi.org/10.1016/j.epsl.2020.116375	[0004]	04G050B	04G050B-m15 core-01-21-2007	OROGEN	Canada	Grease River shear zone / Athabasca granulite Terrane	Felsic granulite	Granulite	Peraluminous felsic granulite		Metamorphic	EMPA		17.11	0.4	1.83	2599		8.7
https://doi.org/10.1016/j.epsl.2020.116375	[0004]	04G050B	04G050B-m15 SW tip 02-01-2007	OROGEN	Canada	Grease River shear zone / Athabasca granulite Terrane	Felsic granulite	Granulite	Peraluminous felsic granulite		Metamorphic	EMPA		8.87	0.38	0.73	1901		12.5
https://doi.org/10.1016/j.epsl.2020.116375	[0004]	04G050B	04G050B-m16 core redo-01-22-2007	OROGEN	Canada	Grease River shear zone / Athabasca granulite Terrane	Felsic granulite	Granulite	Peraluminous felsic granulite		Metamorphic	EMPA		9.7	0.33	1.1	2617		8.1
https://doi.org/10.1016/j.epsl.2020.116375	[0004]	04G050B	04G050B-m18 core 2 try 2-01-29-2007	OROGEN	Canada	Grease River shear zone / Athabasca granulite Terrane	Felsic granulite	Granulite	Peraluminous felsic granulite		Metamorphic	EMPA		9.75	0.3	1.07	2571		25.6
https://doi.org/10.1016/j.epsl.2020.116375	[0004]	04G050B	04G050B-m18 top rim-01-28-2007	OROGEN	Canada	Grease River shear zone / Athabasca granulite Terrane	Felsic granulite	Granulite	Peraluminous felsic granulite		Metamorphic	EMPA		11.79	0.47	1.34	2574		38.3
https://doi.org/10.1016/j.epsl.2020.116375	[0004]	04G050A	04G050A-m1 core-01-22-2007	OROGEN	Canada	Grease River shear zone / Athabasca granulite Terrane	Felsic granulite	Granulite	Peraluminous felsic granulite		Metamorphic	EMPA		9.59	0.34	1.1	2629		15.3
https://doi.org/10.1016/j.epsl.2020.116375	[0004]	04G050A	04G050A-m2-core-12-10-2006	OROGEN	Canada	Grease River shear zone / Athabasca granulite Terrane	Felsic granulite	Granulite	Peraluminous felsic granulite		Metamorphic	EMPA		8.87	0.78	0.86	1908		4.4
https://doi.org/10.1016/j.epsl.2020.116375	[0004]	04G050A	04G050A-m3 core-01-22-2007	OROGEN	Canada	Grease River shear zone / Athabasca granulite Terrane	Felsic granulite	Granulite	Peraluminous felsic granulite		Metamorphic	EMPA		7.15	0.62	0.99	2609		13.1
https://doi.org/10.1016/j.epsl.2020.116375	[0004]	04G050A	04G050A-m3 low-Y core-01-24-2007	OROGEN	Canada	Grease River shear zone / Athabasca granulite Terrane	Felsic granulite	Granulite	Peraluminous felsic granulite		Metamorphic	EMPA		8.58	0.62	1.13	2612		9.7
https://doi.org/10.1016/j.epsl.2020.116375	[0004]	04G050A	04G050A-m3-SWrim-12-17-2006	OROGEN	Canada	Grease River shear zone / Athabasca granulite Terrane	Felsic granulite	Granulite	Peraluminous felsic granulite		Metamorphic	EMPA		9.36	0.73	0.88	1910		14.9
https://doi.org/10.1016/j.epsl.2020.116375	[0004]	04G050A	04G050A-m5-core-12-10-2006	OROGEN	Canada	Grease River shear zone / Athabasca granulite Terrane	Felsic granulite	Granulite	Peraluminous felsic granulite		Metamorphic	EMPA		8.71	0.85	1.22	2556		60.2
https://doi.org/10.1016/j.epsl.2020.116375	[0004]	04G050A	04G050A-m5-hiTh-rim-12-10-2006	OROGEN	Canada	Grease River shear zone / Athabasca granulite Terrane	Felsic granulite	Granulite	Peraluminous felsic granulite		Metamorphic	EMPA		10.4	0.9	1	1903		12.1
https://doi.org/10.1016/j.epsl.2020.116375	[0004]	04G050A	04G050A-m5-SWrim-12-11-2006	OROGEN	Canada	Grease River shear zone / Athabasca granulite Terrane	Felsic granulite	Granulite	Peraluminous felsic granulite		Metamorphic	EMPA		6.29	0.47	0.58	1894		8.5
https://doi.org/10.1016/j.epsl.2020.116375	[0004]	04G050A	04G050A-m6-core-12-18-2006	OROGEN	Canada	Grease River shear zone / Athabasca granulite Terrane	Felsic granulite	Granulite	Peraluminous felsic granulite		Metamorphic	EMPA		6.37	0.22	0.72	2599		51.1
https://doi.org/10.1016/j.epsl.2020.116375	[0004]	04G050A	04G050A-m6 low-Y core-01-23-2007	OROGEN	Canada	Grease River shear zone / Athabasca granulite Terrane	Felsic granulite	Granulite	Peraluminous felsic granulite		Metamorphic	EMPA		8.5	0.6	1.1	2598		21.1
https://doi.org/10.1016/j.epsl.2020.116375	[0004]	04G050A	04G050A-m6-coreoffinger-12-17-2006	OROGEN	Canada	Grease River shear zone / Athabasca granulite Terrane	Felsic granulite	Granulite	Peraluminous felsic granulite		Metamorphic	EMPA		8.29	0.65	0.78	1899		4.2
https://doi.org/10.1016/j.epsl.2020.116375	[0004]	04G050A	04G050A-m6 SW rim-01-23-2007	OROGEN	Canada	Grease River shear zone / Athabasca granulite Terrane	Felsic granulite	Granulite	Peraluminous felsic granulite		Metamorphic	EMPA		9.29	0.8	0.89	1907		9.3
https://doi.org/10.1016/j.epsl.2020.116375	[0004]	04G050A	04G050A-m7 low-Th core-01-23-2007	OROGEN	Canada	Grease River shear zone / Athabasca granulite Terrane	Felsic granulite	Granulite	Peraluminous felsic granulite		Metamorphic	EMPA		6.59	0.49	0.87	2589		33
https://doi.org/10.1016/j.epsl.2020.116375	[0004]	04G050A	04G050A-m7 left rim-01-23-2007	OROGEN	Canada	Grease River shear zone / Athabasca granulite Terrane	Felsic granulite	Granulite	Peraluminous felsic granulite		Metamorphic	EMPA		7.22	0.49	0.66	1916		7.9
https://doi.org/10.1016/j.epsl.2020.116375	[0004]	04G067	04G067m1-Core-12-03-2006	OROGEN	Canada	Grease River shear zone / Athabasca granulite Terrane	Felsic granulite	Granulite	Peraluminous felsic granulite		Metamorphic	EMPA		9.29	0.2	0.97	2561		26.4
https://doi.org/10.1016/j.epsl.2020.116375	[0004]	04G067	04G067m1-Rim-12-03-2006	OROGEN	Canada	Grease River shear zone / Athabasca granulite Terrane	Felsic granulite	Granulite	Peraluminous felsic granulite		Metamorphic	EMPA		7.13	0.3	0.59	1894		30.8
https://doi.org/10.1016/j.epsl.2020.116375	[0004]	04G067	04G067m3-hiTh-core-12-08-2006	OROGEN	Canada	Grease River shear zone / Athabasca granulite Terrane	Felsic granulite	Granulite	Peraluminous felsic granulite		Metamorphic	EMPA		13.38	0.1	1.33	2583		4
https://doi.org/10.1016/j.epsl.2020.116375	[0004]	04G067	04G067m3-E-Rim-12-08-2006	OROGEN	Canada	Grease River shear zone / Athabasca granulite Terrane	Felsic granulite	Granulite	Peraluminous felsic granulite		Metamorphic	EMPA		5.98	0.26	0.68	2550		27.8
https://doi.org/10.1016/j.epsl.2020.116375	[0004]	04G067	04G067m3-W-Rim-12-04-2006	OROGEN	Canada	Grease River shear zone / Athabasca granulite Terrane	Felsic granulite	Granulite	Peraluminous felsic granulite		Metamorphic	EMPA		6.7	0.27	0.76	2571		33.8
https://doi.org/10.1016/j.epsl.2020.116375	[0004]	04G067	04G067m3-Bot-Rim-12-03-2006	OROGEN	Canada	Grease River shear zone / Athabasca granulite Terrane	Felsic granulite	Granulite	Peraluminous felsic granulite		Metamorphic	EMPA		6.67	0.34	0.57	1901		10.1
https://doi.org/10.1016/j.epsl.2020.116375	[0004]	04G067	04G067m21-Core-12-05-2006	OROGEN	Canada	Grease River shear zone / Athabasca granulite Terrane	Felsic granulite	Granulite	Peraluminous felsic granulite		Metamorphic	EMPA		9.71	0.21	1.01	2550		11.7
https://doi.org/10.1016/j.epsl.2020.116375	[0004]	04G067	04G067m21-SWRim-12-03-2006	OROGEN	Canada	Grease River shear zone / Athabasca granulite Terrane	Felsic granulite	Granulite	Peraluminous felsic granulite		Metamorphic	EMPA		5.24	0.34	0.47	1896		41.9
https://doi.org/10.1016/j.epsl.2020.116375	[0004]	04G067	04G067m27-hiYcore-12-05-2006	OROGEN	Canada	Grease River shear zone / Athabasca granulite Terrane	Felsic granulite	Granulite	Peraluminous felsic granulite		Metamorphic	EMPA		1.89	0.43	0.39	2615		9.7
https://doi.org/10.1016/j.epsl.2020.116375	[0004]	04G067	04G067m27-hiThcore-12-08-2006	OROGEN	Canada	Grease River shear zone / Athabasca granulite Terrane	Felsic granulite	Granulite	Peraluminous felsic granulite		Metamorphic	EMPA		9.12	0.21	0.98	2598		9.3
https://doi.org/10.1016/j.epsl.2020.116375	[0004]	04G067	04G067m27-NErim-12-08-2006	OROGEN	Canada	Grease River shear zone / Athabasca granulite Terrane	Felsic granulite	Granulite	Peraluminous felsic granulite		Metamorphic	EMPA		9.42	0.23	1	2561		44.1
https://doi.org/10.1016/j.epsl.2020.116375	[0004]	04G067	04G-67-m20-HiYcore	OROGEN	Canada	Grease River shear zone / Athabasca granulite Terrane	Felsic granulite	Granulite	Peraluminous felsic granulite		Metamorphic	EMPA		1.23	0.86	0.54	2640		18.3
https://doi.org/10.1016/j.epsl.2020.116375	[0004]	04G067	04G067-2-m2-Core-12-03-2006	OROGEN	Canada	Grease River shear zone / Athabasca granulite Terrane	Felsic granulite	Granulite	Peraluminous felsic granulite		Metamorphic	EMPA		8.41	0.39	0.98	2579		16.3
https://doi.org/10.1016/j.epsl.2020.116375	[0004]	04G067	04G067-2-m2-hiTh-rimNE-12-11-2006	OROGEN	Canada	Grease River shear zone / Athabasca granulite Terrane	Felsic granulite	Granulite	Peraluminous felsic granulite		Metamorphic	EMPA		13.43	0.19	1.38	2592		22.1
https://doi.org/10.1016/j.epsl.2020.116375	[0004]	04G067	04G067-2-m2-NWrim-12-11-2006	OROGEN	Canada	Grease River shear zone / Athabasca granulite Terrane	Felsic granulite	Granulite	Peraluminous felsic granulite		Metamorphic	EMPA		7.4	0.35	0.62	1894		20.3
https://doi.org/10.1016/j.epsl.2020.116375	[0004]	04G067	04G067-2-m3-core-12-10-2006	OROGEN	Canada	Grease River shear zone / Athabasca granulite Terrane	Felsic granulite	Granulite	Peraluminous felsic granulite		Metamorphic	EMPA		8.75	0.41	1.03	2590		5.8
https://doi.org/10.1016/j.epsl.2020.116375	[0004]	04G067	04G067-2-m4-Core-12-04-2006	OROGEN	Canada	Grease River shear zone / Athabasca granulite Terrane	Felsic granulite	Granulite	Peraluminous felsic granulite		Metamorphic	EMPA		9.07	0.59	1.15	2588		17.7
https://doi.org/10.1016/j.epsl.2020.116375	[0004]	04G067	04G067-2-m4-loY-core-12-11-2006	OROGEN	Canada	Grease River shear zone / Athabasca granulite Terrane	Felsic granulite	Granulite	Peraluminous felsic granulite		Metamorphic	EMPA		8.67	0.28	0.96	2582		30.4
https://doi.org/10.1016/j.epsl.2020.116375	[0004]	04G067	04G067-2-m4-BotRim-12-04-2006	OROGEN	Canada	Grease River shear zone / Athabasca granulite Terrane	Felsic granulite	Granulite	Peraluminous felsic granulite		Metamorphic	EMPA		7.06	0.25	0.79	2587		19.7
https://doi.org/10.1016/j.epsl.2020.116375	[0004]	04G067	04G067-2-m4-Top-12-05-2006	OROGEN	Canada	Grease River shear zone / Athabasca granulite Terrane	Felsic granulite	Granulite	Peraluminous felsic granulite		Metamorphic	EMPA		5.36	0.26	0.62	2544		15.5
https://doi.org/10.1016/j.gr.2020.03.001	[0005]	nnz1- U014		OROGEN	Egypt	Abu Dabbab / Arabian-Nubian Shield	Granite		Evolved Alkali feldspar granite		Igneous	LAICPMS										73504.9	717.556	2643.29	0.1045		0.00277652	0.9144		0.181619	0.06345		0.0124892	0.13377					640.846		16.2285	659.413		101.212	723.439		417.558
https://doi.org/10.1016/j.gr.2020.03.001	[0005]	nnz1- U015		OROGEN	Egypt	Abu Dabbab / Arabian-Nubian Shield	Granite		Evolved Alkali feldspar granite		Igneous	LAICPMS										72433.6	650.523	2281.47	0.1047		0.00108438	0.8791		0.0978803	0.0609		0.0067513	0.0930205					641.874		6.33077	640.487		54.3169	635.597		238.596
https://doi.org/10.1016/j.gr.2020.03.001	[0005]	nnz2- U016		OROGEN	Egypt	Abu Dabbab / Arabian-Nubian Shield	Granite		Evolved Alkali feldspar granite		Igneous	LAICPMS										76385.5	767.884	2533.57	0.1081		0.00202885	0.9427		0.129169	0.06327		0.00858756	0.136975					661.508		11.8104	674.316		69.8631	717.337		288.216
https://doi.org/10.1016/j.gr.2020.03.001	[0005]	nnz2- U017		OROGEN	Egypt	Abu Dabbab / Arabian-Nubian Shield	Granite		Evolved Alkali feldspar granite		Igneous	LAICPMS										93233.4	625.099	3168.68	0.1038		0.00308919	0.9712		0.188153	0.06786		0.0129906	0.153619					636.591		18.0654	689.071		101.861	864.387		397.026
https://doi.org/10.1016/j.gr.2020.03.001	[0005]	nnz2- U018		OROGEN	Egypt	Abu Dabbab / Arabian-Nubian Shield	Granite		Evolved Alkali feldspar granite		Igneous	LAICPMS										93418.9	647.798	3346.76	0.1046		0.00296945	0.8833		0.123102	0.06124		0.00835585	0.203698					641.334		17.3536	642.761		68.6391	647.778		293.069
https://doi.org/10.1016/j.gr.2020.03.001	[0005]	nnz2- U019		OROGEN	Egypt	Abu Dabbab / Arabian-Nubian Shield	Granite		Evolved Alkali feldspar granite		Igneous	LAICPMS										101407	877.755	3774.22	0.1066		0.00264852	0.8945		0.152879	0.06088		0.0102945	0.145371					652.702		15.4412	648.773		85.4321	635.127		363.963
https://doi.org/10.1016/j.gr.2020.03.001	[0005]	mnz3-U020		OROGEN	Egypt	Abu Dabbab / Arabian-Nubian Shield	Granite		Evolved Alkali feldspar granite		Igneous	LAICPMS										100940	884.528	3606.78	0.106		0.00273945	0.9551		0.13889	0.06537		0.00935473	0.17772					649.325		15.9834	680.768		74.824	786.173		300.51
https://doi.org/10.1016/j.gr.2020.03.001	[0005]	mnz4-U021		OROGEN	Egypt	Abu Dabbab / Arabian-Nubian Shield	Granite		Evolved Alkali feldspar granite		Igneous	LAICPMS										97130.8	500.29	3078.8	0.1039		0.00232552	0.9305		0.122181	0.06495		0.0084036	0.170457					637.235		13.5948	667.919		66.3889	772.868		272.284
https://doi.org/10.1016/j.gr.2020.03.001	[0005]	mnz4-U022		OROGEN	Egypt	Abu Dabbab / Arabian-Nubian Shield	Granite		Evolved Alkali feldspar granite		Igneous	LAICPMS										74191.4	716.404	2381.99	0.1052		0.00130186	0.8987		0.087845	0.06195		0.00600668	0.126603					644.945		7.59945	651.052		48.1	672.278		207.419
https://doi.org/10.1016/j.gr.2020.03.001	[0005]	mnz4-U023		OROGEN	Egypt	Abu Dabbab / Arabian-Nubian Shield	Granite		Evolved Alkali feldspar granite		Igneous	LAICPMS										98203.2	986.877	3105.32	0.1062		0.000895134	0.8867		0.0435314	0.06056		0.00292897	0.171687					650.626		5.21841	644.588		23.702	623.49		104.303
https://doi.org/10.1016/j.gr.2020.03.001	[0005]	mnz4-U024		OROGEN	Egypt	Abu Dabbab / Arabian-Nubian Shield	Granite		Evolved Alkali feldspar granite		Igneous	LAICPMS										97188.6	690.203	3366.69	0.1065		0.00311211	1.035		0.126465	0.07047		0.00836072	0.239154					652.536		18.1604	721.455		65.1485	942.116		243.093
https://doi.org/10.1016/j.gr.2020.03.001	[0005]	mnz4-U025		OROGEN	Egypt	Abu Dabbab / Arabian-Nubian Shield	Granite		Evolved Alkali feldspar granite		Igneous	LAICPMS										82554.2	624.988	2642.43	0.1059		0.00147326	0.8496		0.0913535	0.05818		0.00620324	0.129381					648.89		8.59346	624.408		51.4303	536.673		233.326
https://doi.org/10.1016/j.gr.2020.03.001	[0005]	mnz5-U026		OROGEN	Egypt	Abu Dabbab / Arabian-Nubian Shield	Granite		Evolved Alkali feldspar granite		Igneous	LAICPMS										99954.6	501.374	3239.8	0.1046		0.00243841	0.8951		0.153829	0.06205		0.0105652	0.135646					641.461		14.2494	649.102		85.9583	675.767		364.032
https://doi.org/10.1016/j.gr.2020.03.001	[0005]	mnz6-U027		OROGEN	Egypt	Abu Dabbab / Arabian-Nubian Shield	Granite		Evolved Alkali feldspar granite		Igneous	LAICPMS										77728.6	1285.98	2538.52	0.1059		0.000676592	0.8898		0.0425008	0.06094		0.00288461	0.13376					648.951		3.94548	646.284		23.0968	636.975		101.854
https://doi.org/10.1016/j.gr.2020.03.001	[0005]	mnz6-U028		OROGEN	Egypt	Abu Dabbab / Arabian-Nubian Shield	Granite		Evolved Alkali feldspar granite		Igneous	LAICPMS										78190.6	1378.89	2560.57	0.104		0.000922289	0.8606		0.0536779	0.06003		0.00370619	0.14218					637.676		5.38657	630.428		29.7237	604.517		133.569
https://doi.org/10.1016/j.gr.2020.03.001	[0005]	mnz6-U029		OROGEN	Egypt	Abu Dabbab / Arabian-Nubian Shield	Granite		Evolved Alkali feldspar granite		Igneous	LAICPMS										64532.5	784.042	2194.6	0.1041		0.00159945	0.8691		0.0956263	0.06057		0.00659917	0.139641					638.219		9.34295	635.09		53.3254	623.97		234.945
https://doi.org/10.1016/j.gr.2020.03.001	[0005]	mnz6-U030		OROGEN	Egypt	Abu Dabbab / Arabian-Nubian Shield	Granite		Evolved Alkali feldspar granite		Igneous	LAICPMS										56139.2	1394.42	1850.21	0.1045		0.000903591	0.8947		0.0444021	0.06209		0.00303426	0.174233					640.802		5.27656	648.878		24.0783	677.075		104.458
https://doi.org/10.1016/j.gr.2020.03.001	[0005]	mnz6-U031		OROGEN	Egypt	Abu Dabbab / Arabian-Nubian Shield	Granite		Evolved Alkali feldspar granite		Igneous	LAICPMS										53077.4	1367.79	1806.85	0.1056		0.000853724	0.8899		0.036845	0.06114		0.00248268	0.195262					646.942		4.97825	646.3		19.9908	644.058		87.2727
https://doi.org/10.1016/j.gr.2020.03.001	[0005]	mnz7-U032		OROGEN	Egypt	Abu Dabbab / Arabian-Nubian Shield	Granite		Evolved Alkali feldspar granite		Igneous	LAICPMS										99644.1	514.606	3232.55	0.1025		0.00207412	0.8311		0.125139	0.05878		0.00877026	0.134391					629.256		12.1429	614.199		71.8754	559.067		325.276
https://doi.org/10.1016/j.gr.2020.03.001	[0005]	mnz7-U033		OROGEN	Egypt	Abu Dabbab / Arabian-Nubian Shield	Granite		Evolved Alkali feldspar granite		Igneous	LAICPMS										94723.1	604.611	2937.84	0.1035		0.00161068	0.9497		0.0994675	0.06653		0.00689072	0.148584					635.091		9.41897	677.945		53.1697	823		216.22
https://doi.org/10.1111/jmg.12549	[0006]	10Ag02	m1—Y rich	OROGEN	France	Agly massif / Variscan Orogen	Felsic granulite	Granulite	Kinzigite		Metamorphic	LAICPMS										22143	4839	473	0.04534		0.0015								0.01456		0.00045											292.2
https://doi.org/10.1111/jmg.12549	[0006]	10Ag02	m1—Y rich	OROGEN	France	Agly massif / Variscan Orogen	Felsic granulite	Granulite	Kinzigite		Metamorphic	LAICPMS										26247	5018	441	0.03771		0.00128								0.01196		0.00038											240.2
https://doi.org/10.1111/jmg.12549	[0006]	10Ag02	m2—Y rich	OROGEN	France	Agly massif / Variscan Orogen	Felsic granulite	Granulite	Kinzigite		Metamorphic	LAICPMS										30448	3876	582	0.04894		0.00163								0.01527		0.00045											306.3
https://doi.org/10.1111/jmg.12549	[0006]	10Ag02	m4—Y rich	OROGEN	France	Agly massif / Variscan Orogen	Felsic granulite	Granulite	Kinzigite		Metamorphic	LAICPMS										26049	3612	512	0.04809		0.0016								0.01549		0.00048											310.7
https://doi.org/10.1111/jmg.12549	[0006]	10Ag02	m4—Y rich	OROGEN	France	Agly massif / Variscan Orogen	Felsic granulite	Granulite	Kinzigite		Metamorphic	LAICPMS										21623	3466	439	0.0468		0.00158								0.01547		0.00048											310.3
https://doi.org/10.1111/jmg.12549	[0006]	10Ag02	m5—Y rich	OROGEN	France	Agly massif / Variscan Orogen	Felsic granulite	Granulite	Kinzigite		Metamorphic	LAICPMS										27437	4561	544	0.04692		0.0016								0.01465		0.00045											293.9
https://doi.org/10.1111/jmg.12549	[0006]	10Ag02	m5—Y rich	OROGEN	France	Agly massif / Variscan Orogen	Felsic granulite	Granulite	Kinzigite		Metamorphic	LAICPMS										26643	6601	631	0.04751		0.00158								0.01532		0.00048											307.2
https://doi.org/10.1111/jmg.12549	[0006]	10Ag02	m6—Y rich	OROGEN	France	Agly massif / Variscan Orogen	Felsic granulite	Granulite	Kinzigite		Metamorphic	LAICPMS										12357	3737	268	0.03964		0.00133								0.01222		0.00038											245.5
https://doi.org/10.1111/jmg.12549	[0006]	10Ag02	m6—Y rich	OROGEN	France	Agly massif / Variscan Orogen	Felsic granulite	Granulite	Kinzigite		Metamorphic	LAICPMS										31339	4241	492	0.03952		0.00133								0.01244		0.00038											249.9
https://doi.org/10.1111/jmg.12549	[0006]	10Ag02	m1—Y poor	OROGEN	France	Agly massif / Variscan Orogen	Felsic granulite	Granulite	Kinzigite		Metamorphic	LAICPMS										20410	5659	507	0.04821		0.0016								0.01529		0.00045											306.8
https://doi.org/10.1111/jmg.12549	[0006]	10Ag02	m1—Y poor	OROGEN	France	Agly massif / Variscan Orogen	Felsic granulite	Granulite	Kinzigite		Metamorphic	LAICPMS										30901	3699	439	0.03675		0.00123								0.01156		0.00035											232.4
https://doi.org/10.1111/jmg.12549	[0006]	10Ag02	m1—Y poor	OROGEN	France	Agly massif / Variscan Orogen	Felsic granulite	Granulite	Kinzigite		Metamorphic	LAICPMS										28097	4734	501	0.04174		0.0014								0.01325		0.0004											266
https://doi.org/10.1111/jmg.12549	[0006]	10Ag02	m2—Y poor	OROGEN	France	Agly massif / Variscan Orogen	Felsic granulite	Granulite	Kinzigite		Metamorphic	LAICPMS										30779	5093	565	0.04328		0.00145								0.01371		0.00043											275.3
https://doi.org/10.1111/jmg.12549	[0006]	10Ag02	m3—Y poor	OROGEN	France	Agly massif / Variscan Orogen	Felsic granulite	Granulite	Kinzigite		Metamorphic	LAICPMS										38755	3822	612	0.04298		0.00145								0.0134		0.0004											269.1
https://doi.org/10.1111/jmg.12549	[0006]	10Ag02	m5—Y poor	OROGEN	France	Agly massif / Variscan Orogen	Felsic granulite	Granulite	Kinzigite		Metamorphic	LAICPMS										11373	1353	181	0.04359		0.00155								0.01249		0.00038											250.9
https://doi.org/10.1111/jmg.12549	[0006]	10Ag02	m6—Y poor	OROGEN	France	Agly massif / Variscan Orogen	Felsic granulite	Granulite	Kinzigite		Metamorphic	LAICPMS										24339	5100	496	0.04326		0.00145								0.01388		0.00043											278.7
https://doi.org/10.1111/jmg.12549	[0006]	10Ag04	m2—Y rich rim	OROGEN	France	Agly massif / Variscan Orogen	Felsic granulite	Granulite	Kinzigite		Metamorphic	LAICPMS										32860	7224	760	0.04985		0.00165								0.01564		0.00048											313.8
https://doi.org/10.1111/jmg.12549	[0006]	10Ag04	m2—Y rich rim	OROGEN	France	Agly massif / Variscan Orogen	Felsic granulite	Granulite	Kinzigite		Metamorphic	LAICPMS										33476	7570	780	0.04959		0.00165								0.01557		0.00048											312.2
https://doi.org/10.1111/jmg.12549	[0006]	10Ag04	m2—Y poor core	OROGEN	France	Agly massif / Variscan Orogen	Felsic granulite	Granulite	Kinzigite		Metamorphic	LAICPMS										35788	5751	745	0.04883		0.00163								0.01581		0.00048											317
https://doi.org/10.1111/jmg.12549	[0006]	10Ag04	m2—Y poor core	OROGEN	France	Agly massif / Variscan Orogen	Felsic granulite	Granulite	Kinzigite		Metamorphic	LAICPMS										29611	4635	608	0.04917		0.00163								0.01563		0.00048											313.4
https://doi.org/10.1111/jmg.12549	[0006]	10Ag04	m2—Y rich rim	OROGEN	France	Agly massif / Variscan Orogen	Felsic granulite	Granulite	Kinzigite		Metamorphic	LAICPMS										35005	5419	714	0.04887		0.00163								0.01559		0.00048											312.7
https://doi.org/10.1111/jmg.12549	[0006]	10Ag04	m3—core	OROGEN	France	Agly massif / Variscan Orogen	Felsic granulite	Granulite	Kinzigite		Metamorphic	LAICPMS										31537	5213	644	0.04857		0.0016								0.01525		0.00045											305.9
https://doi.org/10.1111/jmg.12549	[0006]	10Ag04	m3—core	OROGEN	France	Agly massif / Variscan Orogen	Felsic granulite	Granulite	Kinzigite		Metamorphic	LAICPMS										40220	5948	801	0.0489		0.00163								0.01539		0.00045											308.7
https://doi.org/10.1111/jmg.12549	[0006]	10Ag04	m3—core	OROGEN	France	Agly massif / Variscan Orogen	Felsic granulite	Granulite	Kinzigite		Metamorphic	LAICPMS										41614	6526	834	0.04802		0.0016								0.01527		0.00045											306.3
https://doi.org/10.1111/jmg.12549	[0006]	10Ag04	m5—core	OROGEN	France	Agly massif / Variscan Orogen	Felsic granulite	Granulite	Kinzigite		Metamorphic	LAICPMS										34785	5188	689	0.0481		0.0016								0.01528		0.00045											306.5
https://doi.org/10.1111/jmg.12549	[0006]	10Ag04	m5—core	OROGEN	France	Agly massif / Variscan Orogen	Felsic granulite	Granulite	Kinzigite		Metamorphic	LAICPMS										31999	5097	640	0.04783		0.00158								0.01506		0.00045											302.2
https://doi.org/10.1111/jmg.12549	[0006]	10Ag04	m5—core	OROGEN	France	Agly massif / Variscan Orogen	Felsic granulite	Granulite	Kinzigite		Metamorphic	LAICPMS										32865	5085	662	0.04853		0.0016								0.01534		0.00045											307.8
https://doi.org/10.1111/jmg.12549	[0006]	10Ag04	m6—core	OROGEN	France	Agly massif / Variscan Orogen	Felsic granulite	Granulite	Kinzigite		Metamorphic	LAICPMS										45056	4975	825	0.04837		0.0016								0.01542		0.00045											309.4
https://doi.org/10.1111/jmg.12549	[0006]	10Ag04	m8—core	OROGEN	France	Agly massif / Variscan Orogen	Felsic granulite	Granulite	Kinzigite		Metamorphic	LAICPMS										30680	4608	596	0.04681		0.00155								0.01503		0.00045											301.6
https://doi.org/10.1111/jmg.12549	[0006]	10Ag04	m8—core	OROGEN	France	Agly massif / Variscan Orogen	Felsic granulite	Granulite	Kinzigite		Metamorphic	LAICPMS										33250	5015	405	0.02892		0.00095								0.00945		0.00028											190.2
https://doi.org/10.1111/jmg.12549	[0006]	10Ag04	m8—core	OROGEN	France	Agly massif / Variscan Orogen	Felsic granulite	Granulite	Kinzigite		Metamorphic	LAICPMS										33332	5044	654	0.04801		0.00158								0.01523		0.00045											305.5
https://doi.org/10.1111/jmg.12549	[0006]	10Ag04	m9—core	OROGEN	France	Agly massif / Variscan Orogen	Felsic granulite	Granulite	Kinzigite		Metamorphic	LAICPMS										30493	4527	596	0.04763		0.00158								0.01506		0.00045											302.1
https://doi.org/10.1111/jmg.12549	[0006]	10Ag04	m9—core	OROGEN	France	Agly massif / Variscan Orogen	Felsic granulite	Granulite	Kinzigite		Metamorphic	LAICPMS										32727	4557	630	0.04738		0.00158								0.01519		0.00045											304.6
https://doi.org/10.1111/jmg.12549	[0006]	10Ag04	m1 – core	OROGEN	France	Agly massif / Variscan Orogen	Felsic granulite	Granulite	Kinzigite		Metamorphic	LAICPMS										35877	2166	582	0.04871		0.00163								0.01507		0.00045											302.4
https://doi.org/10.1111/jmg.12549	[0006]	10Ag04	m1 – core	OROGEN	France	Agly massif / Variscan Orogen	Felsic granulite	Granulite	Kinzigite		Metamorphic	LAICPMS										41841	2736	675	0.04741		0.00158								0.01484		0.00045											297.8
https://doi.org/10.1111/jmg.12549	[0006]	10Ag04	m1—rim	OROGEN	France	Agly massif / Variscan Orogen	Felsic granulite	Granulite	Kinzigite		Metamorphic	LAICPMS										48625	1426	731	0.04817		0.0016								0.01511		0.00045											303.1
https://doi.org/10.1111/jmg.12549	[0006]	10Ag04	m1—rim	OROGEN	France	Agly massif / Variscan Orogen	Felsic granulite	Granulite	Kinzigite		Metamorphic	LAICPMS										48932	2316	761	0.04732		0.00158								0.01494		0.00045											299.7
https://doi.org/10.1111/jmg.12549	[0006]	10Ag04	m1—rim	OROGEN	France	Agly massif / Variscan Orogen	Felsic granulite	Granulite	Kinzigite		Metamorphic	LAICPMS										44604	4026	769	0.0472		0.00155								0.015		0.00045											301
https://doi.org/10.1111/jmg.12549	[0006]	10Ag04	m1—rim	OROGEN	France	Agly massif / Variscan Orogen	Felsic granulite	Granulite	Kinzigite		Metamorphic	LAICPMS										4830	191	64	0.0395		0.0015								0.01294		0.0004											259.9
https://doi.org/10.1111/jmg.12549	[0006]	10Ag04	m1—rim	OROGEN	France	Agly massif / Variscan Orogen	Felsic granulite	Granulite	Kinzigite		Metamorphic	LAICPMS										43754	2066	671	0.04689		0.00155								0.0148		0.00045											296.9
https://doi.org/10.1111/jmg.12549	[0006]	10Ag04	m3—rim	OROGEN	France	Agly massif / Variscan Orogen	Felsic granulite	Granulite	Kinzigite		Metamorphic	LAICPMS										23110	951	349	0.04688		0.00158								0.01473		0.00045											295.5
https://doi.org/10.1111/jmg.12549	[0006]	10Ag04	m4—rim	OROGEN	France	Agly massif / Variscan Orogen	Felsic granulite	Granulite	Kinzigite		Metamorphic	LAICPMS										35273	2520	578	0.04692		0.00155								0.01493		0.00045											299.5
https://doi.org/10.1111/jmg.12549	[0006]	10Ag04	m4—rim	OROGEN	France	Agly massif / Variscan Orogen	Felsic granulite	Granulite	Kinzigite		Metamorphic	LAICPMS										37997	2492	630	0.04764		0.00158								0.01533		0.00045											307.5
https://doi.org/10.1111/jmg.12549	[0006]	10Ag04	m4—rim	OROGEN	France	Agly massif / Variscan Orogen	Felsic granulite	Granulite	Kinzigite		Metamorphic	LAICPMS										37630	2275	616	0.04816		0.0016								0.0153		0.00045											306.9
https://doi.org/10.1111/jmg.12549	[0006]	10Ag04	m6—rim	OROGEN	France	Agly massif / Variscan Orogen	Felsic granulite	Granulite	Kinzigite		Metamorphic	LAICPMS										43568	4206	768	0.04739		0.00155								0.01534		0.00045											307.7
https://doi.org/10.1111/jmg.12549	[0006]	10Ag04	m8—rim	OROGEN	France	Agly massif / Variscan Orogen	Felsic granulite	Granulite	Kinzigite		Metamorphic	LAICPMS										59718	1919	440	0.02722		0.0009								0.00725		0.00023											146.1
https://doi.org/10.1111/jmg.12549	[0006]	10Ag04	m8—rim	OROGEN	France	Agly massif / Variscan Orogen	Felsic granulite	Granulite	Kinzigite		Metamorphic	LAICPMS										32381	2556	353	0.03106		0.00103								0.00972		0.0003											195.4
https://doi.org/10.1111/jmg.12549	[0006]	10Ag04	m8—rim	OROGEN	France	Agly massif / Variscan Orogen	Felsic granulite	Granulite	Kinzigite		Metamorphic	LAICPMS										37119	3381	634	0.04715		0.00155								0.01499		0.00045											300.7
https://doi.org/10.1111/jmg.12549	[0006]	11Ag03	m1—Y rich core	OROGEN	France	Agly massif / Variscan Orogen	Felsic granulite	Granulite	Kinzigite		Metamorphic	LAICPMS										27138	7662	657	0.04712		0.00155								0.01498		0.00045											300.6
https://doi.org/10.1111/jmg.12549	[0006]	11Ag03	m1—Y poor rim	OROGEN	France	Agly massif / Variscan Orogen	Felsic granulite	Granulite	Kinzigite		Metamorphic	LAICPMS										36284	10408	850	0.04516		0.0015								0.01447		0.00043											290.3
https://doi.org/10.1111/jmg.12549	[0006]	11Ag03	m1—Y poor rim	OROGEN	France	Agly massif / Variscan Orogen	Felsic granulite	Granulite	Kinzigite		Metamorphic	LAICPMS										40545	7842	860	0.04767		0.00158								0.01524		0.00045											305.7
https://doi.org/10.1111/jmg.12549	[0006]	11Ag03	m1—Y poor rim	OROGEN	France	Agly massif / Variscan Orogen	Felsic granulite	Granulite	Kinzigite		Metamorphic	LAICPMS										34389	7008	666	0.04269		0.0014								0.01354		0.0004											271.8
https://doi.org/10.1111/jmg.12549	[0006]	11Ag03	m2—Y rich rim	OROGEN	France	Agly massif / Variscan Orogen	Felsic granulite	Granulite	Kinzigite		Metamorphic	LAICPMS										34251	16570	1053	0.04584		0.0015								0.01447		0.00043											290.3
https://doi.org/10.1111/jmg.12549	[0006]	11Ag03	m2—Y poor core	OROGEN	France	Agly massif / Variscan Orogen	Felsic granulite	Granulite	Kinzigite		Metamorphic	LAICPMS										39756	9084	873	0.04666		0.00155								0.01477		0.00045											296.4
https://doi.org/10.1111/jmg.12549	[0006]	11Ag03	m2—Y rich rim	OROGEN	France	Agly massif / Variscan Orogen	Felsic granulite	Granulite	Kinzigite		Metamorphic	LAICPMS										36239	14446	1026	0.04633		0.00153								0.015		0.00045											301
https://doi.org/10.1111/jmg.12549	[0006]	11Ag03	m5—Y poor core	OROGEN	France	Agly massif / Variscan Orogen	Felsic granulite	Granulite	Kinzigite		Metamorphic	LAICPMS										35782	11807	926	0.04667		0.00155								0.01491		0.00045											299.1
https://doi.org/10.1111/jmg.12549	[0006]	11Ag03	m5—Y poor core	OROGEN	France	Agly massif / Variscan Orogen	Felsic granulite	Granulite	Kinzigite		Metamorphic	LAICPMS										29485	7473	685	0.0471		0.00155								0.01501		0.00045											301.1
https://doi.org/10.1111/jmg.12549	[0006]	11Ag03	m5—Y poor core	OROGEN	France	Agly massif / Variscan Orogen	Felsic granulite	Granulite	Kinzigite		Metamorphic	LAICPMS										31667	9782	793	0.04672		0.00155								0.01485		0.00045											297.9
https://doi.org/10.1111/jmg.12556	[0007]	11696‐007.3	2‐m‐w	OROGEN	Canada	Snowbird Orogen / South Rae Craton	Metapelite	Granulite	Paragneiss		Metamorphic	SHRIMP										1498	51506		0.3385	0.00558525		5.33	0.093808					0.9373											1869	11
https://doi.org/10.1111/jmg.12556	[0007]	11696‐007.2	2‐m‐r	OROGEN	Canada	Snowbird Orogen / South Rae Craton	Metapelite	Granulite	Paragneiss		Metamorphic	SHRIMP										2703	43168		0.3454	0.00528462		5.52	0.086664					0.9736											1893	6
https://doi.org/10.1111/jmg.12556	[0007]	11696‐003.1	2‐m‐w	OROGEN	Canada	Snowbird Orogen / South Rae Craton	Metapelite	Granulite	Paragneiss		Metamorphic	SHRIMP										1973	48677		0.3401	0.00533957		5.44	0.088128					0.9661											1897	8
https://doi.org/10.1111/jmg.12556	[0007]	11696‐004.3	2‐m‐w	OROGEN	Canada	Snowbird Orogen / South Rae Craton	Metapelite	Granulite	Paragneiss		Metamorphic	SHRIMP										2008	49520		0.3467	0.00572055		5.57	0.096918					0.9502											1904	10
https://doi.org/10.1111/jmg.12556	[0007]	11696‐001.2	2‐m‐r	OROGEN	Canada	Snowbird Orogen / South Rae Craton	Metapelite	Granulite	Paragneiss		Metamorphic	SHRIMP										1324	45463		0.3422	0.00557786		5.5	0.09845					0.9102											1905	13
https://doi.org/10.1111/jmg.12556	[0007]	11696‐007.1 dup	2‐m‐r	OROGEN	Canada	Snowbird Orogen / South Rae Craton	Metapelite	Granulite	Paragneiss		Metamorphic	SHRIMP										1289	46059		0.3373	0.00563291		5.43	0.095568					0.949											1906	10
https://doi.org/10.1111/jmg.12556	[0007]	11696‐005.1	2‐m‐w	OROGEN	Canada	Snowbird Orogen / South Rae Craton	Metapelite	Granulite	Paragneiss		Metamorphic	SHRIMP										1753	46214		0.3307	0.00519199		5.32	0.087248					0.9587											1907	8
https://doi.org/10.1111/jmg.12556	[0007]	11696‐002.2	2‐m‐r	OROGEN	Canada	Snowbird Orogen / South Rae Craton	Metapelite	Granulite	Paragneiss		Metamorphic	SHRIMP										1558	44537		0.35	0.005635		5.65	0.09492					0.9617											1911	8
https://doi.org/10.1111/jmg.12556	[0007]	11696‐005.2	1‐g‐w	OROGEN	Canada	Snowbird Orogen / South Rae Craton	Metapelite	Granulite	Paragneiss		Metamorphic	SHRIMP										11632	40797		0.3429	0.00600075		5.54	0.135176					0.7184											1914	30
https://doi.org/10.1111/jmg.12556	[0007]	11696‐004.4	2‐m‐w	OROGEN	Canada	Snowbird Orogen / South Rae Craton	Metapelite	Granulite	Paragneiss		Metamorphic	SHRIMP										1642	44996		0.3421	0.00639727		5.53	0.106176					0.9738											1916	8
https://doi.org/10.1111/jmg.12556	[0007]	11696‐004.2	2‐m‐w	OROGEN	Canada	Snowbird Orogen / South Rae Craton	Metapelite	Granulite	Paragneiss		Metamorphic	SHRIMP										1679	45116		0.3382	0.00527592		5.48	0.088776					0.9647											1920	8
https://doi.org/10.1111/jmg.12556	[0007]	11696‐005.3	1‐g‐w	OROGEN	Canada	Snowbird Orogen / South Rae Craton	Metapelite	Granulite	Paragneiss		Metamorphic	SHRIMP										8301	44716		0.3429	0.00552069		5.56	0.09452					0.9433											1921	10
https://doi.org/10.1111/jmg.12556	[0007]	11696‐001.1	1‐m‐c	OROGEN	Canada	Snowbird Orogen / South Rae Craton	Metapelite	Granulite	Paragneiss		Metamorphic	SHRIMP										2930	41752		0.3517	0.00524033		5.71	0.086792					0.9792											1922	6
https://doi.org/10.1111/jmg.12556	[0007]	11696‐004.1	2‐m‐w	OROGEN	Canada	Snowbird Orogen / South Rae Craton	Metapelite	Granulite	Paragneiss		Metamorphic	SHRIMP										1574	40549		0.3415	0.00536155		5.55	0.08991					0.9665											1925	7
https://doi.org/10.1111/jmg.12556	[0007]	11696‐006.2	1‐m‐c	OROGEN	Canada	Snowbird Orogen / South Rae Craton	Metapelite	Granulite	Paragneiss		Metamorphic	SHRIMP										3425	22387		0.337	0.0049876		5.48	0.09042					0.9006											1925	13
https://doi.org/10.1111/jmg.12556	[0007]	11696‐006.1	2‐m‐r	OROGEN	Canada	Snowbird Orogen / South Rae Craton	Metapelite	Granulite	Paragneiss		Metamorphic	SHRIMP										3452	39238		0.3433	0.00569878		5.59	0.093912					0.9869											1927	5
https://doi.org/10.1111/jmg.12556	[0007]	11696‐002.1	1‐m‐c	OROGEN	Canada	Snowbird Orogen / South Rae Craton	Metapelite	Granulite	Paragneiss		Metamorphic	SHRIMP										3491	43118		0.3541	0.00552396		5.77	0.092897					0.9686											1930	7
https://doi.org/10.1111/jmg.12556	[0007]	11696‐006.5	2‐m‐r	OROGEN	Canada	Snowbird Orogen / South Rae Craton	Metapelite	Granulite	Paragneiss		Metamorphic	SHRIMP										2944	41155		0.3341	0.0050115		5.45	0.083385					0.9779											1930	6
https://doi.org/10.1111/jmg.12556	[0007]	11696‐003.2	2‐m‐w	OROGEN	Canada	Snowbird Orogen / South Rae Craton	Metapelite	Granulite	Paragneiss		Metamorphic	SHRIMP										2398	43628		0.3451	0.0055216		5.63	0.102466					0.8795											1931	16
https://doi.org/10.1111/jmg.12556	[0007]	11696‐003.3	2‐m‐w	OROGEN	Canada	Snowbird Orogen / South Rae Craton	Metapelite	Granulite	Paragneiss		Metamorphic	SHRIMP										3202	41370		0.3529	0.00539937		5.76	0.090432					0.9748											1931	6
https://doi.org/10.1111/jmg.12556	[0007]	11696‐007.1	1‐g‐w	OROGEN	Canada	Snowbird Orogen / South Rae Craton	Metapelite	Granulite	Paragneiss		Metamorphic	SHRIMP										3905	41455		0.3404	0.00582084		5.57	0.096361					0.9891											1936	5
https://doi.org/10.1111/jmg.12556	[0007]	11696‐006.3	1‐g‐w	OROGEN	Canada	Snowbird Orogen / South Rae Craton	Metapelite	Granulite	Paragneiss		Metamorphic	SHRIMP										13720	41991		0.3453	0.00524856		5.65	0.08588					0.9959											1937	2
https://doi.org/10.1111/jmg.12556	[0007]	11696‐001.3	1‐m‐c	OROGEN	Canada	Snowbird Orogen / South Rae Craton	Metapelite	Granulite	Paragneiss		Metamorphic	SHRIMP										3042	42118		0.3427	0.00579163		5.62	0.096664					0.9844											1942	5
https://doi.org/10.1111/jmg.12556	[0007]	11696‐006.4	1‐g‐w	OROGEN	Canada	Snowbird Orogen / South Rae Craton	Metapelite	Granulite	Paragneiss		Metamorphic	SHRIMP										8898	31357		0.343	0.0059339		5.63	0.099651					0.9767											1943	7
https://doi.org/10.1111/jmg.12556	[0007]	11820‐001.2	3‐m‐r	OROGEN	Canada	Snowbird Orogen / South Rae Craton	Metapelite	Granulite	Paragneiss		Metamorphic	SHRIMP										4859	42704		0.3451	0.00503846		5.52	0.081696					0.9871											1895	4
https://doi.org/10.1111/jmg.12556	[0007]	11820‐005.1	3‐m‐w	OROGEN	Canada	Snowbird Orogen / South Rae Craton	Metapelite	Granulite	Paragneiss		Metamorphic	SHRIMP										1324	66390		0.3456	0.00556416		5.55	0.094905					0.9418											1902	10
https://doi.org/10.1111/jmg.12556	[0007]	11820‐001.4	3‐m‐r	OROGEN	Canada	Snowbird Orogen / South Rae Craton	Metapelite	Granulite	Paragneiss		Metamorphic	SHRIMP										3470	30289		0.3264	0.0047328		5.24	0.077028					0.9855											1903	5
https://doi.org/10.1111/jmg.12556	[0007]	11820‐005.3	3‐m‐w	OROGEN	Canada	Snowbird Orogen / South Rae Craton	Metapelite	Granulite	Paragneiss		Metamorphic	SHRIMP										1309	62571		0.3472	0.00562464		5.58	0.094302					0.9534											1903	9
https://doi.org/10.1111/jmg.12556	[0007]	11820‐003.2	3‐m‐r	OROGEN	Canada	Snowbird Orogen / South Rae Craton	Metapelite	Granulite	Paragneiss		Metamorphic	SHRIMP										3018	47118		0.3442	0.005163		5.54	0.088086					0.9432											1907	9
https://doi.org/10.1111/jmg.12556	[0007]	11820‐002.2	3‐m‐r	OROGEN	Canada	Snowbird Orogen / South Rae Craton	Metapelite	Granulite	Paragneiss		Metamorphic	SHRIMP										2830	43262		0.3405	0.0051075		5.49	0.086742					0.9476											1909	9
https://doi.org/10.1111/jmg.12556	[0007]	11820‐006.1	3‐m‐r	OROGEN	Canada	Snowbird Orogen / South Rae Craton	Metapelite	Granulite	Paragneiss		Metamorphic	SHRIMP										3113	56808		0.3458	0.00511784		5.58	0.084816					0.9791											1913	6
https://doi.org/10.1111/jmg.12556	[0007]	11820‐006.2	3‐m‐r	OROGEN	Canada	Snowbird Orogen / South Rae Craton	Metapelite	Granulite	Paragneiss		Metamorphic	SHRIMP										3142	62263		0.3351	0.00562968		5.42	0.092682					0.9825											1914	6
https://doi.org/10.1111/jmg.12556	[0007]	11820‐005.2	3‐m‐w	OROGEN	Canada	Snowbird Orogen / South Rae Craton	Metapelite	Granulite	Paragneiss		Metamorphic	SHRIMP										1461	56273		0.3426	0.00541308		5.54	0.090856					0.9609											1915	8
https://doi.org/10.1111/jmg.12556	[0007]	11820‐006.3	3‐m‐r	OROGEN	Canada	Snowbird Orogen / South Rae Craton	Metapelite	Granulite	Paragneiss		Metamorphic	SHRIMP										2953	66729		0.339	0.005085		5.48	0.084392					0.9746											1916	6
https://doi.org/10.1111/jmg.12556	[0007]	11820‐004.4	2‐g‐w	OROGEN	Canada	Snowbird Orogen / South Rae Craton	Metapelite	Granulite	Paragneiss		Metamorphic	SHRIMP										5257	54044		0.3434	0.00501364		5.58	0.082584					0.9846											1923	5
https://doi.org/10.1111/jmg.12556	[0007]	11820‐002.1	2‐m‐c	OROGEN	Canada	Snowbird Orogen / South Rae Craton	Metapelite	Granulite	Paragneiss		Metamorphic	SHRIMP										6980	13335		0.338	0.0048672		5.49	0.079605					0.9912											1924	3
https://doi.org/10.1111/jmg.12556	[0007]	11820‐002.3	2‐m‐c	OROGEN	Canada	Snowbird Orogen / South Rae Craton	Metapelite	Granulite	Paragneiss		Metamorphic	SHRIMP										6356	21919		0.3449	0.00575983		5.61	0.094248					0.9936											1924	3
https://doi.org/10.1111/jmg.12556	[0007]	11820‐006.6	2‐m‐c	OROGEN	Canada	Snowbird Orogen / South Rae Craton	Metapelite	Granulite	Paragneiss		Metamorphic	SHRIMP										5266	39062		0.3367	0.00491582		5.47	0.080956					0.9883											1925	4
https://doi.org/10.1111/jmg.12556	[0007]	11820‐003.1	2‐m‐c	OROGEN	Canada	Snowbird Orogen / South Rae Craton	Metapelite	Granulite	Paragneiss		Metamorphic	SHRIMP										4814	50311		0.3438	0.00505386		5.61	0.08415					0.9821											1932	5
https://doi.org/10.1111/jmg.12556	[0007]	11820‐004.1	1‐g‐w	OROGEN	Canada	Snowbird Orogen / South Rae Craton	Metapelite	Granulite	Paragneiss		Metamorphic	SHRIMP										3657	32005		0.3532	0.00526268		5.75	0.086825					0.9815											1927	5
https://doi.org/10.1111/jmg.12556	[0007]	11820‐001.3	1‐m‐c	OROGEN	Canada	Snowbird Orogen / South Rae Craton	Metapelite	Granulite	Paragneiss		Metamorphic	SHRIMP										12980	44878		0.3524	0.0056384		5.75	0.092575					0.9959											1933	3
https://doi.org/10.1111/jmg.12556	[0007]	11820‐004.2	1‐g‐w	OROGEN	Canada	Snowbird Orogen / South Rae Craton	Metapelite	Granulite	Paragneiss		Metamorphic	SHRIMP										5243	36540		0.3484	0.00508664		5.69	0.084212					0.9871											1933	4
https://doi.org/10.1111/jmg.12556	[0007]	11820‐006.5	1‐g‐c	OROGEN	Canada	Snowbird Orogen / South Rae Craton	Metapelite	Granulite	Paragneiss		Metamorphic	SHRIMP										3010	33814		0.346	0.0057782		5.65	0.09605					0.9828											1934	6
https://doi.org/10.1111/jmg.12556	[0007]	11820‐006.4	1‐g‐c	OROGEN	Canada	Snowbird Orogen / South Rae Craton	Metapelite	Granulite	Paragneiss		Metamorphic	SHRIMP										3706	34901		0.3453	0.00659523		5.65	0.10961					0.9843											1935	6
https://doi.org/10.1111/jmg.12556	[0007]	11820‐001.1	1‐m‐c	OROGEN	Canada	Snowbird Orogen / South Rae Craton	Metapelite	Granulite	Paragneiss		Metamorphic	SHRIMP										5823	46882		0.3545	0.0051048		5.81	0.084826					0.9891											1939	4
https://doi.org/10.1111/jmg.12556	[0007]	11820‐004.5	1‐g‐c	OROGEN	Canada	Snowbird Orogen / South Rae Craton	Metapelite	Granulite	Paragneiss		Metamorphic	SHRIMP										3808	26087		0.3433	0.00508084		5.65	0.08475					0.9839											1946	5
https://doi.org/10.1111/jmg.12556	[0007]	11820‐004.3	1‐g‐c	OROGEN	Canada	Snowbird Orogen / South Rae Craton	Metapelite	Granulite	Paragneiss		Metamorphic	SHRIMP										3415	21339		0.3541	0.00527609		5.83	0.088616					0.981											1947	5
https://doi.org/10.1111/jmg.12552	[0008]	O31A2-1-022.1	Leucosome	OROGEN	Canada	Baffin Island / Trans-Hudson Orogen	Metapelite	Granulite	Paragneiss		Metamorphic	SHRIMP										26088	1275		0.3136	0.0053312		4.77	0.08586					0.94					1759	26					1803	11
https://doi.org/10.1111/jmg.12552	[0008]	O31A2-2-062.1	Melanosome	OROGEN	Canada	Baffin Island / Trans-Hudson Orogen	Metapelite	Granulite	Paragneiss		Metamorphic	SHRIMP										41772	920		0.3331	0.0059958		5.06	0.11638					0.8					1853	29					1804	25
https://doi.org/10.1111/jmg.12552	[0008]	O31A2-2-060.1	Melanosome	OROGEN	Canada	Baffin Island / Trans-Hudson Orogen	Metapelite	Granulite	Paragneiss		Metamorphic	SHRIMP										39532	1504		0.328	0.00492		5	0.08					0.95					1829	25					1810	9
https://doi.org/10.1111/jmg.12552	[0008]	O31A2-1-019.1	Leucosome	OROGEN	Canada	Baffin Island / Trans-Hudson Orogen	Metapelite	Granulite	Paragneiss		Metamorphic	SHRIMP										29625	1186		0.3245	0.004543		4.96	0.0744					0.95					1812	22					1813	8
https://doi.org/10.1111/jmg.12552	[0008]	O31A2-2-012.1	Leucosome	OROGEN	Canada	Baffin Island / Trans-Hudson Orogen	Metapelite	Granulite	Paragneiss		Metamorphic	SHRIMP										24375	1297		0.3293	0.0042809		5.05	0.06565					0.94					1835	20					1818	9
https://doi.org/10.1111/jmg.12552	[0008]	O31A2-1-017.1	Melanosome	OROGEN	Canada	Baffin Island / Trans-Hudson Orogen	Metapelite	Granulite	Paragneiss		Metamorphic	SHRIMP										38043	1477		0.3373	0.0043849		5.17	0.07238					0.93					1874	20					1818	9
https://doi.org/10.1111/jmg.12552	[0008]	O31A2-2-048.1	Melanosome	OROGEN	Canada	Baffin Island / Trans-Hudson Orogen	Metapelite	Granulite	Paragneiss		Metamorphic	SHRIMP										50520	976		0.328	0.003608		5.04	0.06552					0.89					1829	18					1821	11
https://doi.org/10.1111/jmg.12552	[0008]	O31A2-1-130.2	Garnet	OROGEN	Canada	Baffin Island / Trans-Hudson Orogen	Metapelite	Granulite	Paragneiss		Metamorphic	SHRIMP										39590	1655		0.3368	0.0043784		5.19	0.06747					0.93					1871	20					1829	9
https://doi.org/10.1111/jmg.12552	[0008]	O31A2-2-013.1	Leucosome	OROGEN	Canada	Baffin Island / Trans-Hudson Orogen	Metapelite	Granulite	Paragneiss		Metamorphic	SHRIMP										42685	2195		0.3464	0.0045032		5.34	0.07476					0.95					1917	22					1830	7
https://doi.org/10.1111/jmg.12552	[0008]	O31A2-2-107.1	Leucosome	OROGEN	Canada	Baffin Island / Trans-Hudson Orogen	Metapelite	Granulite	Paragneiss		Metamorphic	SHRIMP										18473	1279		0.334	0.00501		5.16	0.08256					0.95					1858	24					1832	9
https://doi.org/10.1111/jmg.12552	[0008]	O31A2-2-104.1	Leucosome	OROGEN	Canada	Baffin Island / Trans-Hudson Orogen	Metapelite	Granulite	Paragneiss		Metamorphic	SHRIMP										38639	1129		0.345	0.004485		5.35	0.0749					0.92					1911	21					1838	10
https://doi.org/10.1111/jmg.12552	[0008]	O31A2-1-105.2	Garnet	OROGEN	Canada	Baffin Island / Trans-Hudson Orogen	Metapelite	Granulite	Paragneiss		Metamorphic	SHRIMP										37513	1270		0.3327	0.0049905		5.16	0.08256					0.94					1852	25					1840	10
https://doi.org/10.1111/jmg.12552	[0008]	O31A2-1-021.1	Leucosome	OROGEN	Canada	Baffin Island / Trans-Hudson Orogen	Metapelite	Granulite	Paragneiss		Metamorphic	SHRIMP										57870	2115		0.3268	0.0039216		5.07	0.06591					0.94					1823	19					1842	8
https://doi.org/10.1111/jmg.12552	[0008]	O31A2-2-061.1	Melanosome	OROGEN	Canada	Baffin Island / Trans-Hudson Orogen	Metapelite	Granulite	Paragneiss		Metamorphic	SHRIMP										31026	4626		0.348	0.004524		5.42	0.07588					0.94					1925	22					1848	9
https://doi.org/10.1111/jmg.12552	[0008]	O31A2-1-143.1	Melanosome	OROGEN	Canada	Baffin Island / Trans-Hudson Orogen	Metapelite	Granulite	Paragneiss		Metamorphic	SHRIMP										38968	1815		0.3592	0.0043104		5.61	0.07293					0.95					1979	21					1853	8
https://doi.org/10.1111/jmg.12552	[0008]	O31A2-2-066.1	Melanosome	OROGEN	Canada	Baffin Island / Trans-Hudson Orogen	Metapelite	Granulite	Paragneiss		Metamorphic	SHRIMP										34274	895		0.3328	0.0056576		5.21	0.09378					0.95					1852	27					1856	10
https://doi.org/10.1111/jmg.12552	[0008]	O31A2-1-105.1	Garnet	OROGEN	Canada	Baffin Island / Trans-Hudson Orogen	Metapelite	Granulite	Paragneiss		Metamorphic	SHRIMP										14918	4399		0.3303	0.0059454		5.18	0.09324					1					1840	29					1859	3
https://doi.org/10.1111/jmg.12552	[0008]	O31A2-2-059.1	Melanosome	OROGEN	Canada	Baffin Island / Trans-Hudson Orogen	Metapelite	Granulite	Paragneiss		Metamorphic	SHRIMP										32677	2235		0.3379	0.0043927		5.3	0.0742					0.96					1877	22					1860	7
https://doi.org/10.1111/jmg.12552	[0008]	O31A2-2-051.1	Garnet	OROGEN	Canada	Baffin Island / Trans-Hudson Orogen	Metapelite	Granulite	Paragneiss		Metamorphic	SHRIMP										42927	2979		0.3318	0.0039816		5.21	0.06773					0.95					1847	20					1864	8
https://doi.org/10.1111/jmg.12552	[0008]	O31A2-2-049.1	Garnet	OROGEN	Canada	Baffin Island / Trans-Hudson Orogen	Metapelite	Granulite	Paragneiss		Metamorphic	SHRIMP										37506	1961		0.337	0.004718		5.3	0.0795					0.97					1872	23					1864	7
https://doi.org/10.1111/jmg.12552	[0008]	O31A2-1-130.1	Garnet	OROGEN	Canada	Baffin Island / Trans-Hudson Orogen	Metapelite	Granulite	Paragneiss		Metamorphic	SHRIMP										12516	3649		0.3314	0.004971		5.23	0.07845					0.99					1845	23					1870	3
https://doi.org/10.1111/jmg.12552	[0008]	A27A2-1-120.2	Leucosome	OROGEN	Canada	Baffin Island / Trans-Hudson Orogen	Metapelite	Granulite	Paragneiss		Metamorphic	SHRIMP										64329	389		0.3275	0.0062225		4.8	0.1104					0.81					1826	30					1737	25
https://doi.org/10.1111/jmg.12552	[0008]	A27A2-1-049.1	Melanosome	OROGEN	Canada	Baffin Island / Trans-Hudson Orogen	Metapelite	Granulite	Paragneiss		Metamorphic	SHRIMP										39597	2429		0.3183	0.0041379		4.71	0.06123					0.97					1781	20					1756	6
https://doi.org/10.1111/jmg.12552	[0008]	A27A2-1-049.2	Melanosome	OROGEN	Canada	Baffin Island / Trans-Hudson Orogen	Metapelite	Granulite	Paragneiss		Metamorphic	SHRIMP										43799	953		0.2973	0.0050541		4.41	0.07938					0.97					1678	25					1760	8
https://doi.org/10.1111/jmg.12552	[0008]	A27A2-2-131.2	Leucosome	OROGEN	Canada	Baffin Island / Trans-Hudson Orogen	Metapelite	Granulite	Paragneiss		Metamorphic	SHRIMP										51756	517		0.3235	0.0035585		4.82	0.09158					0.56					1807	17					1767	29
https://doi.org/10.1111/jmg.12552	[0008]	A27A2-2-049.1	Melanosome	OROGEN	Canada	Baffin Island / Trans-Hudson Orogen	Metapelite	Granulite	Paragneiss		Metamorphic	SHRIMP										48095	1097		0.3169	0.0044366		4.72	0.0708					0.94					1774	22					1768	10
https://doi.org/10.1111/jmg.12552	[0008]	A27A2-2-067.1	Melanosome	OROGEN	Canada	Baffin Island / Trans-Hudson Orogen	Metapelite	Granulite	Paragneiss		Metamorphic	SHRIMP										48687	1127		0.3177	0.0041301		4.75	0.0665					0.91					1779	19					1771	10
https://doi.org/10.1111/jmg.12552	[0008]	A27A2-2-050.2	Garnet	OROGEN	Canada	Baffin Island / Trans-Hudson Orogen	Metapelite	Granulite	Paragneiss		Metamorphic	SHRIMP										49678	1017		0.3304	0.0042952		4.94	0.09386					0.68					1840	21					1775	26
https://doi.org/10.1111/jmg.12552	[0008]	A27A2-2-068.1	Garnet	OROGEN	Canada	Baffin Island / Trans-Hudson Orogen	Metapelite	Granulite	Paragneiss		Metamorphic	SHRIMP										44082	969		0.3126	0.0053142		4.7	0.0799					0.97					1753	26					1782	8
https://doi.org/10.1111/jmg.12552	[0008]	A27A2-2-132.3	Leucosome	OROGEN	Canada	Baffin Island / Trans-Hudson Orogen	Metapelite	Granulite	Paragneiss		Metamorphic	SHRIMP										49601	469		0.3289	0.0036179		4.94	0.0741					0.72					1833	17					1782	19
https://doi.org/10.1111/jmg.12552	[0008]	A27A2-1-116.2	Leucosome	OROGEN	Canada	Baffin Island / Trans-Hudson Orogen	Metapelite	Granulite	Paragneiss		Metamorphic	SHRIMP										57333	1577		0.3327	0.0043251		5	0.07					0.94					1851	22					1783	9
https://doi.org/10.1111/jmg.12552	[0008]	A27A2-1-039.2	Melanosome	OROGEN	Canada	Baffin Island / Trans-Hudson Orogen	Metapelite	Granulite	Paragneiss		Metamorphic	SHRIMP										39717	1471		0.3179	0.0047685		4.79	0.08143					0.9					1780	24					1786	13
https://doi.org/10.1111/jmg.12552	[0008]	A27A2-2-131.1	Leucosome	OROGEN	Canada	Baffin Island / Trans-Hudson Orogen	Metapelite	Granulite	Paragneiss		Metamorphic	SHRIMP										39812	663		0.3159	0.0053703		4.76	0.08568					0.94					1770	26					1787	11
https://doi.org/10.1111/jmg.12552	[0008]	A27A2-1-120.3	Leucosome	OROGEN	Canada	Baffin Island / Trans-Hudson Orogen	Metapelite	Granulite	Paragneiss		Metamorphic	SHRIMP										72996	449		0.3249	0.0061731		4.9	0.1078					0.86					1814	29					1787	20
https://doi.org/10.1111/jmg.12552	[0008]	A27A2-1-030.1	Melanosome	OROGEN	Canada	Baffin Island / Trans-Hudson Orogen	Metapelite	Granulite	Paragneiss		Metamorphic	SHRIMP										39619	865		0.3284	0.0052544		4.95	0.08415					0.93					1831	25					1789	11
https://doi.org/10.1111/jmg.12552	[0008]	A27A2-1-027.2	Melanosome	OROGEN	Canada	Baffin Island / Trans-Hudson Orogen	Metapelite	Granulite	Paragneiss		Metamorphic	SHRIMP										56240	798		0.3273	0.003273		4.96	0.06448					0.78					1825	16					1796	14
https://doi.org/10.1111/jmg.12552	[0008]	A27A2-1-120.1	Leucosome	OROGEN	Canada	Baffin Island / Trans-Hudson Orogen	Metapelite	Granulite	Paragneiss		Metamorphic	SHRIMP										63985	669		0.3267	0.0042471		4.95	0.07425					0.84					1822	21					1798	15
https://doi.org/10.1111/jmg.12552	[0008]	A27A2-1-025.1	Melanosome	OROGEN	Canada	Baffin Island / Trans-Hudson Orogen	Metapelite	Granulite	Paragneiss		Metamorphic	SHRIMP										62689	666		0.3321	0.0043173		5.04	0.0756					0.85					1849	21					1802	15
https://doi.org/10.1111/jmg.12552	[0008]	A27A2-1-100.2	Leucosome	OROGEN	Canada	Baffin Island / Trans-Hudson Orogen	Metapelite	Granulite	Paragneiss		Metamorphic	SHRIMP										34732	965		0.3286	0.0039432		4.99	0.06487					0.91					1832	20					1802	10
https://doi.org/10.1111/jmg.12552	[0008]	A27A2-1-027.1	Melanosome	OROGEN	Canada	Baffin Island / Trans-Hudson Orogen	Metapelite	Granulite	Paragneiss		Metamorphic	SHRIMP										71297	1139		0.3298	0.0046172		5.04	0.0756					0.91					1837	22					1814	11
https://doi.org/10.1111/jmg.12552	[0008]	A27A2-2-048.1	Melanosome	OROGEN	Canada	Baffin Island / Trans-Hudson Orogen	Metapelite	Granulite	Paragneiss		Metamorphic	SHRIMP										44552	819		0.3181	0.0044534		4.87	0.06818					0.94					1781	21					1815	9
https://doi.org/10.1111/jmg.12552	[0008]	A27A2-1-100.1	Leucosome	OROGEN	Canada	Baffin Island / Trans-Hudson Orogen	Metapelite	Granulite	Paragneiss		Metamorphic	SHRIMP										41479	610		0.3211	0.0041743		4.91	0.07365					0.83					1795	20					1815	15
https://doi.org/10.1111/jmg.12552	[0008]	A27A2-1-114.1	Leucosome	OROGEN	Canada	Baffin Island / Trans-Hudson Orogen	Metapelite	Granulite	Paragneiss		Metamorphic	SHRIMP										59180	607		0.3244	0.0051904		4.97	0.08449					0.94					1811	25					1817	11
https://doi.org/10.1111/jmg.12552	[0008]	A27A2-1-116.1	Leucosome	OROGEN	Canada	Baffin Island / Trans-Hudson Orogen	Metapelite	Granulite	Paragneiss		Metamorphic	SHRIMP										43122	894		0.3264	0.0045696		5	0.075					0.94					1821	22					1817	9
https://doi.org/10.1111/jmg.12552	[0008]	A27A2-1-111.1	Leucosome	OROGEN	Canada	Baffin Island / Trans-Hudson Orogen	Metapelite	Granulite	Paragneiss		Metamorphic	SHRIMP										68291	1607		0.3428	0.0041136		5.26	0.06838					0.94					1900	20					1820	8
https://doi.org/10.1111/jmg.12552	[0008]	A27A2-1-051.1	Melanosome	OROGEN	Canada	Baffin Island / Trans-Hudson Orogen	Metapelite	Granulite	Paragneiss		Metamorphic	SHRIMP										56405	529		0.325	0.004875		5	0.085					0.88					1814	24					1824	14
https://doi.org/10.1111/jmg.12552	[0008]	A27A2-2-132.1	Leucosome	OROGEN	Canada	Baffin Island / Trans-Hudson Orogen	Metapelite	Granulite	Paragneiss		Metamorphic	SHRIMP										50653	443		0.3238	0.0067998		4.98	0.11952					0.88					1808	33					1826	21
https://doi.org/10.1111/jmg.12552	[0008]	A27A2-1-054.1	Melanosome	OROGEN	Canada	Baffin Island / Trans-Hudson Orogen	Metapelite	Granulite	Paragneiss		Metamorphic	SHRIMP										63016	1210		0.3339	0.0043407		5.16	0.07224					0.91					1857	20					1832	10
https://doi.org/10.1111/jmg.12552	[0008]	A27A2-1-052.1	Melanosome	OROGEN	Canada	Baffin Island / Trans-Hudson Orogen	Metapelite	Granulite	Paragneiss		Metamorphic	SHRIMP										57048	645		0.3328	0.0043264		5.15	0.07725					0.87					1852	21					1836	13
https://doi.org/10.1111/jmg.12552	[0008]	A27A2-2-047.1	Melanosome	OROGEN	Canada	Baffin Island / Trans-Hudson Orogen	Metapelite	Granulite	Paragneiss		Metamorphic	SHRIMP										45883	964		0.3282	0.0045948		5.08	0.08636					0.84					1830	23					1837	17
https://doi.org/10.1111/jmg.12552	[0008]	A27A2-2-050.1	Garnet	OROGEN	Canada	Baffin Island / Trans-Hudson Orogen	Metapelite	Granulite	Paragneiss		Metamorphic	SHRIMP										45626	1214		0.3373	0.0043849		5.23	0.07845					0.86					1874	21					1840	13
https://doi.org/10.1111/jmg.12552	[0008]	A27A2-1-025.2	Melanosome	OROGEN	Canada	Baffin Island / Trans-Hudson Orogen	Metapelite	Granulite	Paragneiss		Metamorphic	SHRIMP										47964	2656		0.3378	0.005067		5.26	0.0789					0.98					1876	24					1848	5
https://doi.org/10.1111/jmg.12552	[0008]	A27A2-1-039.1	Melanosome	OROGEN	Canada	Baffin Island / Trans-Hudson Orogen	Metapelite	Granulite	Paragneiss		Metamorphic	SHRIMP										34111	795		0.323	0.004522		5.04	0.08064					0.86					1804	21					1851	15
https://doi.org/10.1111/jmg.12552	[0008]	A27A2-2-132.2	Leucosome	OROGEN	Canada	Baffin Island / Trans-Hudson Orogen	Metapelite	Granulite	Paragneiss		Metamorphic	SHRIMP										41989	1602		0.3376	0.003376		5.27	0.05797					0.93					1875	16					1854	7
https://doi.org/10.1111/jmg.12552	[0008]	A27A2-2-049.2	Melanosome	OROGEN	Canada	Baffin Island / Trans-Hudson Orogen	Metapelite	Granulite	Paragneiss		Metamorphic	SHRIMP										32818	3526		0.3346	0.0053536		5.26	0.08942					0.9					1861	25					1866	13
https://doi.org/10.1007/s00531-020-01898-6	[0009]	SL6_mnz10_1		OROGEN	France	Maures-Tanneron Massif / Variscan Orogen	Metapelite	Amphibolite	Garnet micaschist		Metamorphic	LAICPMS													0.0537	0.00201084		0.404	0.0144667		0.05442		0.00115283	0.96589	0.0167092		0.000642549											334.939
https://doi.org/10.1007/s00531-020-01898-6	[0009]	SL6_mnz10_2		OROGEN	France	Maures-Tanneron Massif / Variscan Orogen	Metapelite	Amphibolite	Garnet micaschist		Metamorphic	LAICPMS													0.0546	0.0022787		0.412	0.0171143		0.05434		0.00117628	0.96886	0.0170865		0.000738715											342.439
https://doi.org/10.1007/s00531-020-01898-6	[0009]	SL6_mnz10_3		OROGEN	France	Maures-Tanneron Massif / Variscan Orogen	Metapelite	Amphibolite	Garnet micaschist		Metamorphic	LAICPMS													0.0559	0.0019519		0.426	0.0155432		0.05479		0.00116652	0.9567	0.017304		0.000632999											346.76
https://doi.org/10.1007/s00531-020-01898-6	[0009]	SL6_mnz10_4		OROGEN	France	Maures-Tanneron Massif / Variscan Orogen	Metapelite	Amphibolite	Garnet micaschist		Metamorphic	LAICPMS													0.0547	0.00210638		0.42	0.0163267		0.05502		0.00118886	0.9688	0.0170777		0.000688976											342.262
https://doi.org/10.1007/s00531-020-01898-6	[0009]	SL6_mnz10_5		OROGEN	France	Maures-Tanneron Massif / Variscan Orogen	Metapelite	Amphibolite	Garnet micaschist		Metamorphic	LAICPMS													0.0537	0.00192704		0.406	0.0153276		0.05462		0.00113553	0.97856	0.017139		0.000671852											343.481
https://doi.org/10.1007/s00531-020-01898-6	[0009]	SL6_mnz9_1		OROGEN	France	Maures-Tanneron Massif / Variscan Orogen	Metapelite	Amphibolite	Garnet micaschist		Metamorphic	LAICPMS													0.0534	0.00226729		0.397	0.0169718		0.05363		0.00111111	0.98755	0.0173854		0.00078663											348.378
https://doi.org/10.1007/s00531-020-01898-6	[0009]	SL6_mnz9_2		OROGEN	France	Maures-Tanneron Massif / Variscan Orogen	Metapelite	Amphibolite	Garnet micaschist		Metamorphic	LAICPMS													0.0533	0.00184021		0.406	0.0144891		0.05484		0.00116746	0.95928	0.016654		0.000591627											333.84
https://doi.org/10.1007/s00531-020-01898-6	[0009]	SL6_mnz9_3		OROGEN	France	Maures-Tanneron Massif / Variscan Orogen	Metapelite	Amphibolite	Garnet micaschist		Metamorphic	LAICPMS													0.0523	0.00225701		0.405	0.0179335		0.05598		0.00114717	0.98925	0.0173108		0.00076016											346.895
https://doi.org/10.1007/s00531-020-01898-6	[0009]	SL6_mnz9_4		OROGEN	France	Maures-Tanneron Massif / Variscan Orogen	Metapelite	Amphibolite	Garnet micaschist		Metamorphic	LAICPMS													0.0529	0.00208791		0.406	0.0170568		0.05492		0.00118701	0.96831	0.0168625		0.000685059											337.985
https://doi.org/10.1007/s00531-020-01898-6	[0009]	SL6_mnz9_5		OROGEN	France	Maures-Tanneron Massif / Variscan Orogen	Metapelite	Amphibolite	Garnet micaschist		Metamorphic	LAICPMS													0.0544	0.00210327		0.424	0.0155213		0.05666		0.0012346	0.9646	0.0172554		0.000679149											345.795
https://doi.org/10.1007/s00531-020-01898-6	[0009]	SL6_mnz9_6		OROGEN	France	Maures-Tanneron Massif / Variscan Orogen	Metapelite	Amphibolite	Garnet micaschist		Metamorphic	LAICPMS													0.0546	0.0022787		0.42	0.018071		0.05578		0.00120672	0.9746	0.0173118		0.000755132											346.915
https://doi.org/10.1007/s00531-020-01898-6	[0009]	SL6_mnz9_7		OROGEN	France	Maures-Tanneron Massif / Variscan Orogen	Metapelite	Amphibolite	Garnet micaschist		Metamorphic	LAICPMS													0.0545	0.00185421		0.426	0.014717		0.05666		0.00119843	0.96973	0.0172217		0.000632255											345.124
https://doi.org/10.1007/s00531-020-01898-6	[0009]	SL6_mnz9_8		OROGEN	France	Maures-Tanneron Massif / Variscan Orogen	Metapelite	Amphibolite	Garnet micaschist		Metamorphic	LAICPMS													0.0542	0.00218748		0.415	0.0171432		0.05567		0.00118307	0.97378	0.017059		0.000694026											341.891
https://doi.org/10.1007/s00531-020-01898-6	[0009]	SL6_mnz9_9		OROGEN	France	Maures-Tanneron Massif / Variscan Orogen	Metapelite	Amphibolite	Garnet micaschist		Metamorphic	LAICPMS													0.0531	0.00217666		0.413	0.0180063		0.05603		0.00125724	0.96113	0.0169176		0.000715257											339.08
https://doi.org/10.1007/s00531-020-01898-6	[0009]	SL6_mnz9_10		OROGEN	France	Maures-Tanneron Massif / Variscan Orogen	Metapelite	Amphibolite	Garnet micaschist		Metamorphic	LAICPMS													0.0554	0.00211368		0.419	0.0154669		0.05476		0.00116257	0.97737	0.0175373		0.000700843											351.395
https://doi.org/10.1007/s00531-020-01898-6	[0009]	SL6_mnz9_11		OROGEN	France	Maures-Tanneron Massif / Variscan Orogen	Metapelite	Amphibolite	Garnet micaschist		Metamorphic	LAICPMS													0.0546	0.00219145		0.42	0.018071		0.05512		0.00119071	0.97077	0.0168943		0.000667932											338.618
https://doi.org/10.1007/s00531-020-01898-6	[0009]	SL6_mnz9_12		OROGEN	France	Maures-Tanneron Massif / Variscan Orogen	Metapelite	Amphibolite	Garnet micaschist		Metamorphic	LAICPMS													0.0535	0.00192481		0.414	0.0154129		0.0558		0.00117892	0.97218	0.0175409		0.000666034											351.467
https://doi.org/10.1007/s00531-020-01898-6	[0009]	SL6_mnz9_13		OROGEN	France	Maures-Tanneron Massif / Variscan Orogen	Metapelite	Amphibolite	Garnet micaschist		Metamorphic	LAICPMS													0.0537	0.0023587		0.422	0.0180896		0.0569		0.00122745	0.97296	0.017032		0.000787919											341.355
https://doi.org/10.1007/s00531-020-01898-6	[0009]	SL6_mnz9_14		OROGEN	France	Maures-Tanneron Massif / Variscan Orogen	Metapelite	Amphibolite	Garnet micaschist		Metamorphic	LAICPMS													0.0558	0.00220351		0.432	0.0173104		0.05609		0.00115622	0.98746	0.0171749		0.000698744											344.195
https://doi.org/10.1007/s00531-020-01898-6	[0009]	SL6_mnz9_15		OROGEN	France	Maures-Tanneron Massif / Variscan Orogen	Metapelite	Amphibolite	Garnet micaschist		Metamorphic	LAICPMS													0.0525	0.00208387		0.4	0.0161245		0.05496		0.00119547	0.96573	0.016677		0.000700061											334.299
https://doi.org/10.1007/s00531-020-01898-6	[0009]	SL6_mnz8_1		OROGEN	France	Maures-Tanneron Massif / Variscan Orogen	Metapelite	Amphibolite	Garnet micaschist		Metamorphic	LAICPMS													0.0546	0.00193713		0.412	0.0145567		0.05462		0.00116333	0.96787	0.0171024		0.000643791											342.755
https://doi.org/10.1007/s00531-020-01898-6	[0009]	SL6_mnz8_2		OROGEN	France	Maures-Tanneron Massif / Variscan Orogen	Metapelite	Amphibolite	Garnet micaschist		Metamorphic	LAICPMS													0.0535	0.00209402		0.401	0.0161344		0.0541		0.0011372	0.97874	0.0163443		0.000651534											327.684
https://doi.org/10.1007/s00531-020-01898-6	[0009]	SL6_mnz8_3		OROGEN	France	Maures-Tanneron Massif / Variscan Orogen	Metapelite	Amphibolite	Garnet micaschist		Metamorphic	LAICPMS													0.0559	0.00229127		0.421	0.0172016		0.05392		0.00112488	0.98374	0.017241		0.000710573											345.509
https://doi.org/10.1007/s00531-020-01898-6	[0009]	SL6_mnz8_4		OROGEN	France	Maures-Tanneron Massif / Variscan Orogen	Metapelite	Amphibolite	Garnet micaschist		Metamorphic	LAICPMS													0.0543	0.00210224		0.408	0.0162045		0.05431		0.00115751	0.97394	0.0170091		0.000706817											340.9
https://doi.org/10.1007/s00531-020-01898-6	[0009]	SL6_mnz8_5		OROGEN	France	Maures-Tanneron Massif / Variscan Orogen	Metapelite	Amphibolite	Garnet micaschist		Metamorphic	LAICPMS													0.0543	0.00218847		0.419	0.0163164		0.05539		0.00117444	0.97248	0.0168995		0.000694802											338.722
https://doi.org/10.1007/s00531-020-01898-6	[0009]	SL6_mnz8_6		OROGEN	France	Maures-Tanneron Massif / Variscan Orogen	Metapelite	Amphibolite	Garnet micaschist		Metamorphic	LAICPMS													0.0558	0.00195076		0.414	0.0145794		0.05354		0.00118178	0.93666	0.0172154		0.000651285											344.999
https://doi.org/10.1007/s00531-020-01898-6	[0009]	SL6_mnz8_7		OROGEN	France	Maures-Tanneron Massif / Variscan Orogen	Metapelite	Amphibolite	Garnet micaschist		Metamorphic	LAICPMS													0.0541	0.00218649		0.403	0.0170283		0.05306		0.00112718	0.97822	0.0165327		0.000687049											331.429
https://doi.org/10.1007/s00531-020-01898-6	[0009]	SL6_mnz8_8		OROGEN	France	Maures-Tanneron Massif / Variscan Orogen	Metapelite	Amphibolite	Garnet micaschist		Metamorphic	LAICPMS													0.0542	0.00193263		0.412	0.0153915		0.0547		0.00114562	0.98213	0.0170679		0.000642227											342.067
https://doi.org/10.1007/s00531-020-01898-6	[0009]	CD6_mnz1_1		OROGEN	France	Maures-Tanneron Massif / Variscan Orogen	Metapelite	Amphibolite	Staurolite ± kyanite micaschist		Metamorphic	LAICPMS													0.0516	0.00225056		0.381	0.0168245		0.05326		0.00110139	0.98981	0.0162724		0.000727009											326.253
https://doi.org/10.1007/s00531-020-01898-6	[0009]	CD6_mnz1_2		OROGEN	France	Maures-Tanneron Massif / Variscan Orogen	Metapelite	Amphibolite	Staurolite ± kyanite micaschist		Metamorphic	LAICPMS													0.0511	0.00215743		0.377	0.0167884		0.05319		0.00110003	0.98777	0.0160464		0.000682303											321.757
https://doi.org/10.1007/s00531-020-01898-6	[0009]	CD6_mnz1_3		OROGEN	France	Maures-Tanneron Massif / Variscan Orogen	Metapelite	Amphibolite	Staurolite ± kyanite micaschist		Metamorphic	LAICPMS													0.0525	0.00199812		0.388	0.0151399		0.0539		0.00111897	0.98705	0.0165145		0.000660415											331.068
https://doi.org/10.1007/s00531-020-01898-6	[0009]	CD6_mnz1_4		OROGEN	France	Maures-Tanneron Massif / Variscan Orogen	Metapelite	Amphibolite	Staurolite ± kyanite micaschist		Metamorphic	LAICPMS													0.053	0.00183674		0.395	0.0135429		0.05383		0.00111242	0.98069	0.0167954		0.000637746											336.653
https://doi.org/10.1007/s00531-020-01898-6	[0009]	CD6_mnz1_5		OROGEN	France	Maures-Tanneron Massif / Variscan Orogen	Metapelite	Amphibolite	Staurolite ± kyanite micaschist		Metamorphic	LAICPMS													0.0521	0.00216697		0.394	0.0160653		0.05464		0.00113592	0.97944	0.0165338		0.000671448											331.451
https://doi.org/10.1007/s00531-020-01898-6	[0009]	CD6_mnz1_6		OROGEN	France	Maures-Tanneron Massif / Variscan Orogen	Metapelite	Amphibolite	Staurolite ± kyanite micaschist		Metamorphic	LAICPMS													0.0541	0.00210017		0.402	0.0161444		0.05347		0.00110802	0.9883	0.0169208		0.00069012											339.144
https://doi.org/10.1007/s00531-020-01898-6	[0009]	CD6_mnz1_7		OROGEN	France	Maures-Tanneron Massif / Variscan Orogen	Metapelite	Amphibolite	Staurolite ± kyanite micaschist		Metamorphic	LAICPMS													0.0517	0.00207585		0.393	0.0169346		0.05446		0.00112715	0.98375	0.0163078		0.000673763											326.957
https://doi.org/10.1007/s00531-020-01898-6	[0009]	CD6_mnz1_8		OROGEN	France	Maures-Tanneron Massif / Variscan Orogen	Metapelite	Amphibolite	Staurolite ± kyanite micaschist		Metamorphic	LAICPMS													0.0509	0.0019815		0.384	0.0150991		0.05422		0.00112251	0.98448	0.0162007		0.0006741											324.828
https://doi.org/10.1007/s00531-020-01898-6	[0009]	CD6_mnz1_9		OROGEN	France	Maures-Tanneron Massif / Variscan Orogen	Metapelite	Amphibolite	Staurolite ± kyanite micaschist		Metamorphic	LAICPMS													0.0511	0.00215743		0.381	0.0159394		0.05391		0.00112188	0.98659	0.0161424		0.000682078											323.667
https://doi.org/10.1007/s00531-020-01898-6	[0009]	CD6_mnz1_10		OROGEN	France	Maures-Tanneron Massif / Variscan Orogen	Metapelite	Amphibolite	Staurolite ± kyanite micaschist		Metamorphic	LAICPMS													0.0522	0.00191048		0.392	0.0143341		0.05452		0.00112578	0.98572	0.0163223		0.000620627											327.245
https://doi.org/10.1007/s00531-020-01898-6	[0009]	CD6_mnz1_11		OROGEN	France	Maures-Tanneron Massif / Variscan Orogen	Metapelite	Amphibolite	Staurolite ± kyanite micaschist		Metamorphic	LAICPMS													0.053	0.0020034		0.397	0.015233		0.05387		0.00112392	0.98206	0.0168326		0.000665006											337.392
https://doi.org/10.1007/s00531-020-01898-6	[0009]	CD6_mnz9b_1		OROGEN	France	Maures-Tanneron Massif / Variscan Orogen	Metapelite	Amphibolite	Staurolite ± kyanite micaschist		Metamorphic	LAICPMS													0.0524	0.00208286		0.399	0.0161146		0.05525		0.00115322	0.98089	0.0160904		0.000659558											322.634
https://doi.org/10.1007/s00531-020-01898-6	[0009]	CD6_mnz9b_2		OROGEN	France	Maures-Tanneron Massif / Variscan Orogen	Metapelite	Amphibolite	Staurolite ± kyanite micaschist		Metamorphic	LAICPMS													0.0523	0.00191157		0.389	0.0143013		0.05371		0.00112375	0.98039	0.0161823		0.000612011											324.461
https://doi.org/10.1007/s00531-020-01898-6	[0009]	CD6_mnz9b_3		OROGEN	France	Maures-Tanneron Massif / Variscan Orogen	Metapelite	Amphibolite	Staurolite ± kyanite micaschist		Metamorphic	LAICPMS													0.0539	0.00201298		0.396	0.014378		0.05356		0.00112693	0.97353	0.0166746		0.00066858											334.251
https://doi.org/10.1007/s00531-020-01898-6	[0009]	CD6_mnz9b_4		OROGEN	France	Maures-Tanneron Massif / Variscan Orogen	Metapelite	Amphibolite	Staurolite ± kyanite micaschist		Metamorphic	LAICPMS													0.0553	0.00211264		0.41	0.0162247		0.0534		0.00111491	0.98103	0.0167443		0.000694109											335.637
https://doi.org/10.1007/s00531-020-01898-6	[0009]	CD6_mnz9b_5		OROGEN	France	Maures-Tanneron Massif / Variscan Orogen	Metapelite	Amphibolite	Staurolite ± kyanite micaschist		Metamorphic	LAICPMS													0.0536	0.00200977		0.405	0.0161744		0.0546		0.00113246	0.98383	0.0164879		0.000668967											330.539
https://doi.org/10.1007/s00531-020-01898-6	[0009]	CD6_mnz9b_6		OROGEN	France	Maures-Tanneron Massif / Variscan Orogen	Metapelite	Amphibolite	Staurolite ± kyanite micaschist		Metamorphic	LAICPMS													0.0524	0.00199707		0.408	0.0162045		0.056		0.0011676	0.98259	0.0161134		0.00064531											323.091
https://doi.org/10.1007/s00531-020-01898-6	[0009]	CD6_mnz9b_7		OROGEN	France	Maures-Tanneron Massif / Variscan Orogen	Metapelite	Amphibolite	Staurolite ± kyanite micaschist		Metamorphic	LAICPMS													0.0523	0.00234609		0.396	0.0187544		0.05511		0.00113479	0.9925	0.0162087		0.000724873											324.985
https://doi.org/10.1007/s00531-020-01898-6	[0009]	CD6_mnz9b_8		OROGEN	France	Maures-Tanneron Massif / Variscan Orogen	Metapelite	Amphibolite	Staurolite ± kyanite micaschist		Metamorphic	LAICPMS													0.0529	0.00191817		0.392	0.013508		0.05394		0.00111454	0.98203	0.0160821		0.0006315											322.468
https://doi.org/10.1007/s00531-020-01898-6	[0009]	CD6_mnz9b_9		OROGEN	France	Maures-Tanneron Massif / Variscan Orogen	Metapelite	Amphibolite	Staurolite ± kyanite micaschist		Metamorphic	LAICPMS													0.0541	0.00201512		0.399	0.0152539		0.05327		0.00110958	0.98393	0.0169083		0.000661559											338.897
https://doi.org/10.1007/s00531-020-01898-6	[0009]	CD6_mnz9b_10		OROGEN	France	Maures-Tanneron Massif / Variscan Orogen	Metapelite	Amphibolite	Staurolite ± kyanite micaschist		Metamorphic	LAICPMS													0.0526	0.0021718		0.394	0.0160653		0.05417		0.001119	0.98689	0.0163949		0.000683155											328.69
https://doi.org/10.1007/s00531-020-01898-6	[0009]	CD6_mnz22_1		OROGEN	France	Maures-Tanneron Massif / Variscan Orogen	Metapelite	Amphibolite	Staurolite ± kyanite micaschist		Metamorphic	LAICPMS													0.0532	0.00192148		0.399	0.0152539		0.05411		0.00112038	0.98282	0.016417		0.000624205											329.128
https://doi.org/10.1007/s00531-020-01898-6	[0009]	CD6_mnz22_2		OROGEN	France	Maures-Tanneron Massif / Variscan Orogen	Metapelite	Amphibolite	Staurolite ± kyanite micaschist		Metamorphic	LAICPMS													0.0526	0.00199918		0.389	0.0151502		0.05359		0.00110529	0.98472	0.0162546		0.000648257											325.899
https://doi.org/10.1007/s00531-020-01898-6	[0009]	CD6_mnz22_4		OROGEN	France	Maures-Tanneron Massif / Variscan Orogen	Metapelite	Amphibolite	Staurolite ± kyanite micaschist		Metamorphic	LAICPMS													0.0528	0.0020869		0.394	0.0160653		0.05404		0.00111648	0.99006	0.0164152		0.000691599											329.092
https://doi.org/10.1007/s00531-020-01898-6	[0009]	CD6_mnz22_5		OROGEN	France	Maures-Tanneron Massif / Variscan Orogen	Metapelite	Amphibolite	Staurolite ± kyanite micaschist		Metamorphic	LAICPMS													0.0547	0.00193826		0.399	0.0144111		0.05274		0.00108176	0.98391	0.0167703		0.000587232											336.153
https://doi.org/10.1007/s00531-020-01898-6	[0009]	CD6_mnz22_6		OROGEN	France	Maures-Tanneron Massif / Variscan Orogen	Metapelite	Amphibolite	Staurolite ± kyanite micaschist		Metamorphic	LAICPMS													0.0544	0.00218946		0.401	0.0161344		0.0531		0.00110916	0.9853	0.016505		0.000685608											330.878
https://doi.org/10.1007/s00531-020-01898-6	[0009]	CD6_mnz22_7		OROGEN	France	Maures-Tanneron Massif / Variscan Orogen	Metapelite	Amphibolite	Staurolite ± kyanite micaschist		Metamorphic	LAICPMS													0.0522	0.00199498		0.388	0.0151399		0.05389		0.0011111	0.98599	0.0160389		0.000642326											321.609
https://doi.org/10.1007/s00531-020-01898-6	[0009]	CD6_mnz12_1		OROGEN	France	Maures-Tanneron Massif / Variscan Orogen	Metapelite	Amphibolite	Staurolite ± kyanite micaschist		Metamorphic	LAICPMS													0.0526	0.00152207		0.4061	0.0120489		0.0558		0.00117263	0.95466	0.0158157		0.000469093											317.168
https://doi.org/10.1007/s00531-020-01898-6	[0009]	CD6_mnz12_2		OROGEN	France	Maures-Tanneron Massif / Variscan Orogen	Metapelite	Amphibolite	Staurolite ± kyanite micaschist		Metamorphic	LAICPMS													0.0545	0.00177429		0.4064	0.012732		0.05448		0.00112255	0.97742	0.0158516		0.000494179											317.882
https://doi.org/10.1007/s00531-020-01898-6	[0009]	CD6_mnz12_3		OROGEN	France	Maures-Tanneron Massif / Variscan Orogen	Metapelite	Amphibolite	Staurolite ± kyanite micaschist		Metamorphic	LAICPMS													0.0511	0.00165363		0.383	0.0125967		0.05402		0.00112679	0.96852	0.0159656		0.000525635											320.15
https://doi.org/10.1007/s00531-020-01898-6	[0009]	MTM10_mnz32_1		OROGEN	France	Maures-Tanneron Massif / Variscan Orogen	Metapelite	Amphibolite	Albite-bearing mica schist		Metamorphic	LAICPMS													0.0533	0.00209197		0.395	0.0160751		0.05369		0.00114588	0.9695	0.0164394		0.000660425											329.573
https://doi.org/10.1007/s00531-020-01898-6	[0009]	MTM10_mnz32_2		OROGEN	France	Maures-Tanneron Massif / Variscan Orogen	Metapelite	Amphibolite	Albite-bearing mica schist		Metamorphic	LAICPMS													0.0549	0.00219445		0.397	0.015233		0.05292		0.00114241	0.96141	0.0168485		0.000689972											337.707
https://doi.org/10.1007/s00531-020-01898-6	[0009]	MTM10_mnz32_3		OROGEN	France	Maures-Tanneron Massif / Variscan Orogen	Metapelite	Amphibolite	Albite-bearing mica schist		Metamorphic	LAICPMS													0.0543	0.00201727		0.397	0.015233		0.05318		0.00114352	0.96787	0.0164341		0.000635964											329.469
https://doi.org/10.1007/s00531-020-01898-6	[0009]	MTM10_mnz32_4		OROGEN	France	Maures-Tanneron Massif / Variscan Orogen	Metapelite	Amphibolite	Albite-bearing mica schist		Metamorphic	LAICPMS													0.0554	0.00246326		0.403	0.0188139		0.0533		0.00112839	0.97956	0.0168915		0.000761886											338.563
https://doi.org/10.1007/s00531-020-01898-6	[0009]	MTM10_mnz32_5		OROGEN	France	Maures-Tanneron Massif / Variscan Orogen	Metapelite	Amphibolite	Albite-bearing mica schist		Metamorphic	LAICPMS													0.0534	0.00200764		0.4	0.0152643		0.05393		0.00113397	0.97593	0.0165499		0.000664864											331.771
https://doi.org/10.1007/s00531-020-01898-6	[0009]	MTM10_mnz30_1		OROGEN	France	Maures-Tanneron Massif / Variscan Orogen	Metapelite	Amphibolite	Albite-bearing mica schist		Metamorphic	LAICPMS													0.0517	0.00207585		0.41	0.017095		0.0571		0.00121003	0.98134	0.0160359		0.000646428											321.549
https://doi.org/10.1007/s00531-020-01898-6	[0009]	MTM10_mnz30_2		OROGEN	France	Maures-Tanneron Massif / Variscan Orogen	Metapelite	Amphibolite	Albite-bearing mica schist		Metamorphic	LAICPMS													0.0518	0.0019908		0.398	0.0152434		0.05561		0.00119607	0.96754	0.0164725		0.000628818											330.231
https://doi.org/10.1007/s00531-020-01898-6	[0009]	MTM10_mnz8_1		OROGEN	France	Maures-Tanneron Massif / Variscan Orogen	Metapelite	Amphibolite	Albite-bearing mica schist		Metamorphic	LAICPMS													0.0535	0.00209402		0.396	0.0169625		0.0543		0.00117554	0.97224	0.016494		0.000645794											330.66
https://doi.org/10.1007/s00531-020-01898-6	[0009]	MTM10_mnz8_2		OROGEN	France	Maures-Tanneron Massif / Variscan Orogen	Metapelite	Amphibolite	Albite-bearing mica schist		Metamorphic	LAICPMS													0.0528	0.00200128		0.393	0.014345		0.05407		0.00112224	0.98068	0.0162733		0.000654249											326.27
https://doi.org/10.1007/s00531-020-01898-6	[0009]	MTM10_mnz8_3		OROGEN	France	Maures-Tanneron Massif / Variscan Orogen	Metapelite	Amphibolite	Albite-bearing mica schist		Metamorphic	LAICPMS													0.0544	0.00193488		0.401	0.0144333		0.05313		0.00111567	0.97092	0.016699		0.000620946											334.736
https://doi.org/10.1007/s00531-020-01898-6	[0009]	MTM10_mnz8_4		OROGEN	France	Maures-Tanneron Massif / Variscan Orogen	Metapelite	Amphibolite	Albite-bearing mica schist		Metamorphic	LAICPMS													0.0544	0.00227678		0.397	0.0169718		0.05273		0.00110805	0.98233	0.016735		0.000698843											335.45
https://doi.org/10.1007/s00531-020-01898-6	[0009]	CD1_mnz1_1		OROGEN	France	Maures-Tanneron Massif / Variscan Orogen	Metapelite	Amphibolite	Staurolite ± kyanite micaschist		Metamorphic	LAICPMS													0.0531	0.00217666		0.412	0.0162449		0.0561		0.00116952	0.98371	0.0164211		0.000691196											329.209
https://doi.org/10.1007/s00531-020-01898-6	[0009]	CD1_mnz1_2		OROGEN	France	Maures-Tanneron Massif / Variscan Orogen	Metapelite	Amphibolite	Staurolite ± kyanite micaschist		Metamorphic	LAICPMS													0.0551	0.00273211		0.439	0.0218424		0.05776		0.00120141	0.98992	0.0167382		0.000822476											335.515
https://doi.org/10.1007/s00531-020-01898-6	[0009]	CD1_mnz1_3		OROGEN	France	Maures-Tanneron Massif / Variscan Orogen	Metapelite	Amphibolite	Staurolite ± kyanite micaschist		Metamorphic	LAICPMS													0.0538	0.00227107		0.425	0.0181177		0.05673		0.00119034	0.98395	0.0166189		0.000712267											333.144
https://doi.org/10.1007/s00531-020-01898-6	[0009]	CD1_mnz1_4		OROGEN	France	Maures-Tanneron Massif / Variscan Orogen	Metapelite	Amphibolite	Staurolite ± kyanite micaschist		Metamorphic	LAICPMS													0.0555	0.0020303		0.461	0.0167633		0.06005		0.0012429	0.98266	0.0166969		0.000622685											334.694
https://doi.org/10.1007/s00531-020-01898-6	[0009]	CD1_mnz1_5		OROGEN	France	Maures-Tanneron Massif / Variscan Orogen	Metapelite	Amphibolite	Staurolite ± kyanite micaschist		Metamorphic	LAICPMS													0.0552	0.00228447		0.449	0.019226		0.05826		0.00121955	0.98454	0.0168166		0.000727295											337.074
https://doi.org/10.1007/s00531-020-01898-6	[0009]	CD1_mnz1_6		OROGEN	France	Maures-Tanneron Massif / Variscan Orogen	Metapelite	Amphibolite	Staurolite ± kyanite micaschist		Metamorphic	LAICPMS													0.0537	0.00227013		0.456	0.0192918		0.06162		0.00129881	0.98419	0.0171593		0.000748691											343.885
https://doi.org/10.1007/s00531-020-01898-6	[0009]	CD1_mnz1_7		OROGEN	France	Maures-Tanneron Massif / Variscan Orogen	Metapelite	Amphibolite	Staurolite ± kyanite micaschist		Metamorphic	LAICPMS													0.0532	0.00217764		0.434	0.0182028		0.05922		0.00123224	0.98455	0.0169487		0.000716673											339.698
https://doi.org/10.1007/s00531-020-01898-6	[0009]	CD1_mnz1_8		OROGEN	France	Maures-Tanneron Massif / Variscan Orogen	Metapelite	Amphibolite	Staurolite ± kyanite micaschist		Metamorphic	LAICPMS													0.0534	0.0019237		0.43	0.0155872		0.05839		0.00121629	0.97876	0.0166156		0.000627072											333.077
https://doi.org/10.1007/s00531-020-01898-6	[0009]	CD1_mnz1_9		OROGEN	France	Maures-Tanneron Massif / Variscan Orogen	Metapelite	Amphibolite	Staurolite ± kyanite micaschist		Metamorphic	LAICPMS													0.0509	0.0018964		0.39	0.0143122		0.05537		0.00115552	0.97475	0.0168222		0.000617083											337.184
https://doi.org/10.1007/s00531-020-01898-6	[0009]	CD1_mnz3b_1		OROGEN	France	Maures-Tanneron Massif / Variscan Orogen	Metapelite	Amphibolite	Staurolite ± kyanite micaschist		Metamorphic	LAICPMS													0.0547	0.00202159		0.448	0.0166217		0.05849		0.00126445	0.96374	0.0172707		0.000626556											346.098
https://doi.org/10.1007/s00531-020-01898-6	[0009]	CD1_mnz3b_2		OROGEN	France	Maures-Tanneron Massif / Variscan Orogen	Metapelite	Amphibolite	Staurolite ± kyanite micaschist		Metamorphic	LAICPMS													0.0547	0.00210638		0.433	0.0164619		0.05738		0.00121206	0.9762	0.0172122		0.000695157											344.936
https://doi.org/10.1007/s00531-020-01898-6	[0009]	CD1_mnz3b_3		OROGEN	France	Maures-Tanneron Massif / Variscan Orogen	Metapelite	Amphibolite	Staurolite ± kyanite micaschist		Metamorphic	LAICPMS													0.0534	0.0019237		0.437	0.0165042		0.05902		0.00124958	0.9712	0.016572		0.000595329											332.21
https://doi.org/10.1007/s00531-020-01898-6	[0009]	CD1_mnz3b_4		OROGEN	France	Maures-Tanneron Massif / Variscan Orogen	Metapelite	Amphibolite	Staurolite ± kyanite micaschist		Metamorphic	LAICPMS													0.0531	0.00208994		0.453	0.0166758		0.06138		0.00128806	0.97271	0.0165929		0.000648785											332.626
https://doi.org/10.1007/s00531-020-01898-6	[0009]	CD1_mnz3b_5		OROGEN	France	Maures-Tanneron Massif / Variscan Orogen	Metapelite	Amphibolite	Staurolite ± kyanite micaschist		Metamorphic	LAICPMS													0.0534	0.00217959		0.41	0.0162247		0.05534		0.00114939	0.98756	0.0170659		0.000732013											342.029
https://doi.org/10.1007/s00531-020-01898-6	[0009]	CD1_mnz3b_6		OROGEN	France	Maures-Tanneron Massif / Variscan Orogen	Metapelite	Amphibolite	Staurolite ± kyanite micaschist		Metamorphic	LAICPMS													0.0511	0.00224599		0.405	0.0179335		0.05727		0.00118661	0.98894	0.0165577		0.000716774											331.927
https://doi.org/10.1007/s00531-020-01898-6	[0009]	CD1_mnz3b_7		OROGEN	France	Maures-Tanneron Massif / Variscan Orogen	Metapelite	Amphibolite	Staurolite ± kyanite micaschist		Metamorphic	LAICPMS													0.0516	0.00190395		0.393	0.0151914		0.05549		0.00115782	0.9809	0.0167277		0.000657076											335.307
https://doi.org/10.1007/s00531-020-01898-6	[0009]	CD1_mnz5_1		OROGEN	France	Maures-Tanneron Massif / Variscan Orogen	Metapelite	Amphibolite	Staurolite ± kyanite micaschist		Metamorphic	LAICPMS													0.051	0.00189747		0.394	0.0152018		0.05594		0.00115577	0.98401	0.0160961		0.000661345											322.746
https://doi.org/10.1007/s00531-020-01898-6	[0009]	CD1_mnz5_2		OROGEN	France	Maures-Tanneron Massif / Variscan Orogen	Metapelite	Amphibolite	Staurolite ± kyanite micaschist		Metamorphic	LAICPMS													0.055	0.00228254		0.455	0.0192824		0.05989		0.00127606	0.97711	0.0165426		0.000675895											331.627
https://doi.org/10.1007/s00531-020-01898-6	[0009]	CD1_mnz5_3		OROGEN	France	Maures-Tanneron Massif / Variscan Orogen	Metapelite	Amphibolite	Staurolite ± kyanite micaschist		Metamorphic	LAICPMS													0.0542	0.00193263		0.451	0.0166541		0.06051		0.00128101	0.97007	0.0167012		0.000613292											334.78
https://doi.org/10.1007/s00531-020-01898-6	[0009]	CD1_mnz5_4		OROGEN	France	Maures-Tanneron Massif / Variscan Orogen	Metapelite	Amphibolite	Staurolite ± kyanite micaschist		Metamorphic	LAICPMS													0.0535	0.00235688		0.443	0.0191703		0.05966		0.00125532	0.98145	0.017177		0.000759634											344.236
https://doi.org/10.1007/s00531-020-01898-6	[0009]	CD1_mnz5_5		OROGEN	France	Maures-Tanneron Massif / Variscan Orogen	Metapelite	Amphibolite	Staurolite ± kyanite micaschist		Metamorphic	LAICPMS													0.0528	0.00226167		0.42	0.018071		0.05756		0.00121547	0.98295	0.0168083		0.000733105											336.909
https://doi.org/10.1007/s00531-020-01898-6	[0009]	CD1_mnz4_1		OROGEN	France	Maures-Tanneron Massif / Variscan Orogen	Metapelite	Amphibolite	Staurolite ± kyanite micaschist		Metamorphic	LAICPMS													0.052	0.00207885		0.403	0.0170283		0.05606		0.00116597	0.98621	0.0163711		0.000656174											328.215
https://doi.org/10.1007/s00531-020-01898-6	[0009]	CD1_mnz4_2		OROGEN	France	Maures-Tanneron Massif / Variscan Orogen	Metapelite	Amphibolite	Staurolite ± kyanite micaschist		Metamorphic	LAICPMS													0.0544	0.00218946		0.431	0.0181743		0.05712		0.00119192	0.97854	0.0170939		0.000735569											342.585
https://doi.org/10.1007/s00531-020-01898-6	[0009]	CD1_mnz4_3		OROGEN	France	Maures-Tanneron Massif / Variscan Orogen	Metapelite	Amphibolite	Staurolite ± kyanite micaschist		Metamorphic	LAICPMS													0.0547	0.00227966		0.436	0.0182219		0.05775		0.00125077	0.97603	0.0166288		0.000708839											333.339
https://doi.org/10.1007/s00531-020-01898-6	[0009]	CD1_mnz4_4		OROGEN	France	Maures-Tanneron Massif / Variscan Orogen	Metapelite	Amphibolite	Staurolite ± kyanite micaschist		Metamorphic	LAICPMS													0.054	0.00201405		0.428	0.0164096		0.05812		0.00123938	0.97557	0.0165441		0.000660394											331.655
https://doi.org/10.1007/s00531-020-01898-6	[0009]	CD1_mnz4_5		OROGEN	France	Maures-Tanneron Massif / Variscan Orogen	Metapelite	Amphibolite	Staurolite ± kyanite micaschist		Metamorphic	LAICPMS													0.0521	0.0023443		0.405	0.0179335		0.05624		0.00116412	0.98914	0.0159916		0.000747319											320.667
https://doi.org/10.1007/s00531-020-01898-6	[0009]	CD1_mnz4_6		OROGEN	France	Maures-Tanneron Massif / Variscan Orogen	Metapelite	Amphibolite	Staurolite ± kyanite micaschist		Metamorphic	LAICPMS													0.0532	0.00226541		0.422	0.0180896		0.0574		0.00121244	0.98371	0.0165685		0.000674478											332.141
https://doi.org/10.1007/s00531-020-01898-6	[0009]	CD1_mnz6_5		OROGEN	France	Maures-Tanneron Massif / Variscan Orogen	Metapelite	Amphibolite	Staurolite ± kyanite micaschist		Metamorphic	LAICPMS													0.0526	0.00208488		0.446	0.0183185		0.0617		0.00130352	0.97814	0.0162884		0.000671471											326.572
https://doi.org/10.1007/s00531-020-01898-6	[0009]	CD1_mnz7_1		OROGEN	France	Maures-Tanneron Massif / Variscan Orogen	Metapelite	Amphibolite	Staurolite ± kyanite micaschist		Metamorphic	LAICPMS													0.0532	0.00217764		0.406	0.0161844		0.05559		0.00115421	0.98594	0.0170191		0.00070758											341.098
https://doi.org/10.1007/s00531-020-01898-6	[0009]	CD1_mnz7_2		OROGEN	France	Maures-Tanneron Massif / Variscan Orogen	Metapelite	Amphibolite	Staurolite ± kyanite micaschist		Metamorphic	LAICPMS													0.0525	0.00208387		0.444	0.018299		0.06128		0.00129884	0.97802	0.0162066		0.000645743											324.945
https://doi.org/10.1007/s00531-020-01898-6	[0009]	CD1_mnz7_3		OROGEN	France	Maures-Tanneron Massif / Variscan Orogen	Metapelite	Amphibolite	Staurolite ± kyanite micaschist		Metamorphic	LAICPMS													0.055	0.00194165		0.453	0.0166758		0.05947		0.00126818	0.96394	0.0168902		0.000615											338.536
https://doi.org/10.1007/s00531-020-01898-6	[0009]	CD1_mnz7_4		OROGEN	France	Maures-Tanneron Massif / Variscan Orogen	Metapelite	Amphibolite	Staurolite ± kyanite micaschist		Metamorphic	LAICPMS													0.0531	0.00226447		0.422	0.0180896		0.05757		0.00118736	0.99012	0.0167625		0.000722235											335.997
https://doi.org/10.1007/s00531-020-01898-6	[0009]	CD1_mnz3_1		OROGEN	France	Maures-Tanneron Massif / Variscan Orogen	Metapelite	Amphibolite	Staurolite ± kyanite micaschist		Metamorphic	LAICPMS													0.0529	0.00208791		0.422	0.0172114		0.05796		0.00122627	0.97616	0.0166236		0.000618353											333.236
https://doi.org/10.1007/s00531-020-01898-6	[0009]	CD1_mnz3_2		OROGEN	France	Maures-Tanneron Massif / Variscan Orogen	Metapelite	Amphibolite	Staurolite ± kyanite micaschist		Metamorphic	LAICPMS													0.0542	0.00218748		0.46	0.0193298		0.0608		0.00128979	0.97877	0.0169731		0.000696024											340.185
https://doi.org/10.1007/s00531-020-01898-6	[0009]	CD1_mnz3_3		OROGEN	France	Maures-Tanneron Massif / Variscan Orogen	Metapelite	Amphibolite	Staurolite ± kyanite micaschist		Metamorphic	LAICPMS													0.0522	0.00182755		0.445	0.0157547		0.06161		0.00132978	0.9577	0.0161135		0.000595425											323.092
https://doi.org/10.1007/s00531-020-01898-6	[0009]	CD1_mnz3_4		OROGEN	France	Maures-Tanneron Massif / Variscan Orogen	Metapelite	Amphibolite	Staurolite ± kyanite micaschist		Metamorphic	LAICPMS													0.0532	0.00192148		0.452	0.016665		0.06217		0.00130313	0.97825	0.01618		0.000641979											324.415
https://doi.org/10.1007/s00531-020-01898-6	[0009]	CD1_mnz3_5		OROGEN	France	Maures-Tanneron Massif / Variscan Orogen	Metapelite	Amphibolite	Staurolite ± kyanite micaschist		Metamorphic	LAICPMS													0.0523	0.00225701		0.437	0.0191151		0.06092		0.00130591	0.97613	0.0165091		0.000745196											330.959
https://doi.org/10.1007/s00531-020-01898-6	[0009]	CD1_mnz3_6		OROGEN	France	Maures-Tanneron Massif / Variscan Orogen	Metapelite	Amphibolite	Staurolite ± kyanite micaschist		Metamorphic	LAICPMS													0.0536	0.00209504		0.479	0.0186488		0.06482		0.00136903	0.97434	0.0161451		0.000628202											323.722
https://doi.org/10.1007/s00531-020-01893-x	[0010]	H101-m9-1		OROGEN	Iran	Hamadan metamorphic Complex / Sanandaj-Sirjan Zone	Metapelite	Amphibolite (Hornfels)	Crd + Kfs Hornfels		Metamorphic	EMPA		5.8345	0.683288	0.0568401	168.285		76.4932
https://doi.org/10.1007/s00531-020-01893-x	[0010]	H101-m9-2		OROGEN	Iran	Hamadan metamorphic Complex / Sanandaj-Sirjan Zone	Metapelite	Amphibolite (Hornfels)	Crd + Kfs Hornfels		Metamorphic	EMPA		5.36307	0.348351	0.0449893	164.939		94.702
https://doi.org/10.1007/s00531-020-01893-x	[0010]	H101-m9-3		OROGEN	Iran	Hamadan metamorphic Complex / Sanandaj-Sirjan Zone	Metapelite	Amphibolite (Hornfels)	Crd + Kfs Hornfels		Metamorphic	EMPA		4.8749	0.339467	0.0407624	162.11		102.927
https://doi.org/10.1007/s00531-020-01893-x	[0010]	H101-m10-1		OROGEN	Iran	Hamadan metamorphic Complex / Sanandaj-Sirjan Zone	Metapelite	Amphibolite (Hornfels)	Crd + Kfs Hornfels		Metamorphic	EMPA		4.46784	0.398154	0.0416933	172.249		106.821
https://doi.org/10.1007/s00531-020-01893-x	[0010]	H101-m10-2		OROGEN	Iran	Hamadan metamorphic Complex / Sanandaj-Sirjan Zone	Metapelite	Amphibolite (Hornfels)	Crd + Kfs Hornfels		Metamorphic	EMPA		4.1626	0.536975	0.0355709	143.626		104.455
https://doi.org/10.1007/s00531-020-01893-x	[0010]	H101-m10-3		OROGEN	Iran	Hamadan metamorphic Complex / Sanandaj-Sirjan Zone	Metapelite	Amphibolite (Hornfels)	Crd + Kfs Hornfels		Metamorphic	EMPA		4.15054	0.591892	0.0444562	174.631		101.481
https://doi.org/10.1007/s00531-020-01893-x	[0010]	H101-m13-2		OROGEN	Iran	Hamadan metamorphic Complex / Sanandaj-Sirjan Zone	Metapelite	Amphibolite (Hornfels)	Crd + Kfs Hornfels		Metamorphic	EMPA		9.91786	0.196612	0.0667299	150.037		58.1727
https://doi.org/10.1007/s00531-020-01893-x	[0010]	H101-m14		OROGEN	Iran	Hamadan metamorphic Complex / Sanandaj-Sirjan Zone	Metapelite	Amphibolite (Hornfels)	Crd + Kfs Hornfels		Metamorphic	EMPA		4.76081	0.432462	0.0441905	170.543		99.83
https://doi.org/10.1007/s00531-020-01893-x	[0010]	H101-m15-1		OROGEN	Iran	Hamadan metamorphic Complex / Sanandaj-Sirjan Zone	Metapelite	Amphibolite (Hornfels)	Crd + Kfs Hornfels		Metamorphic	EMPA		3.11657	0.24769	0.0204552	124.451		157.201
https://doi.org/10.1007/s00531-020-01893-x	[0010]	H101-m15-2		OROGEN	Iran	Hamadan metamorphic Complex / Sanandaj-Sirjan Zone	Metapelite	Amphibolite (Hornfels)	Crd + Kfs Hornfels		Metamorphic	EMPA		3.86433	0.520899	0.032106	137.935		111.089
https://doi.org/10.1007/s00531-020-01893-x	[0010]	H101-m16		OROGEN	Iran	Hamadan metamorphic Complex / Sanandaj-Sirjan Zone	Metapelite	Amphibolite (Hornfels)	Crd + Kfs Hornfels		Metamorphic	EMPA		9.9165	0.221855	0.0691551	154.431		57.731
https://doi.org/10.1007/s00531-020-01893-x	[0010]	H101-m17		OROGEN	Iran	Hamadan metamorphic Complex / Sanandaj-Sirjan Zone	Metapelite	Amphibolite (Hornfels)	Crd + Kfs Hornfels		Metamorphic	EMPA		4.7346	0.299369	0.0359099	149.609		107.826
https://doi.org/10.1007/s00531-020-01893-x	[0010]	H101-m18		OROGEN	Iran	Hamadan metamorphic Complex / Sanandaj-Sirjan Zone	Metapelite	Amphibolite (Hornfels)	Crd + Kfs Hornfels		Metamorphic	EMPA		4.42988	0.558355	0.0298174	114.196		98.9422
https://doi.org/10.1007/s00531-020-01893-x	[0010]	H101-m19-1		OROGEN	Iran	Hamadan metamorphic Complex / Sanandaj-Sirjan Zone	Metapelite	Amphibolite (Hornfels)	Crd + Kfs Hornfels		Metamorphic	EMPA		12.1013	0.305379	0.0962132	174.434		46.8804
https://doi.org/10.1007/s00531-020-01893-x	[0010]	H101-m19-2		OROGEN	Iran	Hamadan metamorphic Complex / Sanandaj-Sirjan Zone	Metapelite	Amphibolite (Hornfels)	Crd + Kfs Hornfels		Metamorphic	EMPA		4.10322	0.454918	0.0430214	183.367		110.296
https://doi.org/10.1007/s00531-020-01893-x	[0010]	H101-m19-3		OROGEN	Iran	Hamadan metamorphic Complex / Sanandaj-Sirjan Zone	Metapelite	Amphibolite (Hornfels)	Crd + Kfs Hornfels		Metamorphic	EMPA		4.27492	0.520024	0.0381517	152.492		103.384
https://doi.org/10.1007/s00531-020-01893-x	[0010]	H101-m19-4		OROGEN	Iran	Hamadan metamorphic Complex / Sanandaj-Sirjan Zone	Metapelite	Amphibolite (Hornfels)	Crd + Kfs Hornfels		Metamorphic	EMPA		8.87817	0.249028	0.0704565	172.702		63.3769
https://doi.org/10.1007/s00531-020-01893-x	[0010]	H101-m19-5		OROGEN	Iran	Hamadan metamorphic Complex / Sanandaj-Sirjan Zone	Metapelite	Amphibolite (Hornfels)	Crd + Kfs Hornfels		Metamorphic	EMPA		4.32068	0.497606	0.0410586	164.751		103.78
https://doi.org/10.1007/s00531-020-01893-x	[0010]	H101-m20-2		OROGEN	Iran	Hamadan metamorphic Complex / Sanandaj-Sirjan Zone	Metapelite	Amphibolite (Hornfels)	Crd + Kfs Hornfels		Metamorphic	EMPA		4.14721	0.46606	0.0412894	173.605		108.787
https://doi.org/10.1007/s00531-020-01893-x	[0010]	H101-m21		OROGEN	Iran	Hamadan metamorphic Complex / Sanandaj-Sirjan Zone	Metapelite	Amphibolite (Hornfels)	Crd + Kfs Hornfels		Metamorphic	EMPA		5.43504	0.20092	0.0249285	97.3442		101.137
https://doi.org/10.1007/s00531-020-01893-x	[0010]	H101-m22		OROGEN	Iran	Hamadan metamorphic Complex / Sanandaj-Sirjan Zone	Metapelite	Amphibolite (Hornfels)	Crd + Kfs Hornfels		Metamorphic	EMPA		12.6687	0.358399	0.105398	180.816		44.372
https://doi.org/10.1007/s00531-020-01893-x	[0010]	H101-m23		OROGEN	Iran	Hamadan metamorphic Complex / Sanandaj-Sirjan Zone	Metapelite	Amphibolite (Hornfels)	Crd + Kfs Hornfels		Metamorphic	EMPA		4.98098	0.196009	0.0406726	172.214		109.342
https://doi.org/10.1007/s00531-020-01893-x	[0010]	H101-m24-2		OROGEN	Iran	Hamadan metamorphic Complex / Sanandaj-Sirjan Zone	Metapelite	Amphibolite (Hornfels)	Crd + Kfs Hornfels		Metamorphic	EMPA		4.54782	0.342793	0.0428879	180.128		108.62
https://doi.org/10.1007/s00531-020-01893-x	[0010]	H101-m25		OROGEN	Iran	Hamadan metamorphic Complex / Sanandaj-Sirjan Zone	Metapelite	Amphibolite (Hornfels)	Crd + Kfs Hornfels		Metamorphic	EMPA		9.79836	0.271452	0.0629404	140.015		57.5403
https://doi.org/10.1007/s00531-020-01893-x	[0010]	H101-m26		OROGEN	Iran	Hamadan metamorphic Complex / Sanandaj-Sirjan Zone	Metapelite	Amphibolite (Hornfels)	Crd + Kfs Hornfels		Metamorphic	EMPA		7.81924	0.263747	0.0636784	174.289		70.7771
https://doi.org/10.1007/s00531-020-01893-x	[0010]	H101-m27-2		OROGEN	Iran	Hamadan metamorphic Complex / Sanandaj-Sirjan Zone	Metapelite	Amphibolite (Hornfels)	Crd + Kfs Hornfels		Metamorphic	EMPA		5.48714	0.378172	0.0395401	140.203		91.6858
https://doi.org/10.1007/s00531-020-01893-x	[0010]	H101-m27-3		OROGEN	Iran	Hamadan metamorphic Complex / Sanandaj-Sirjan Zone	Metapelite	Amphibolite (Hornfels)	Crd + Kfs Hornfels		Metamorphic	EMPA		16.2025	0.209192	0.120711	169.749		36.3424
https://doi.org/10.1007/s00531-020-01893-x	[0010]	H101-m28		OROGEN	Iran	Hamadan metamorphic Complex / Sanandaj-Sirjan Zone	Metapelite	Amphibolite (Hornfels)	Crd + Kfs Hornfels		Metamorphic	EMPA		4.04924	0.664045	0.0436554	167.723		99.3914
https://doi.org/10.1007/s00531-020-01893-x	[0010]	H101-m29		OROGEN	Iran	Hamadan metamorphic Complex / Sanandaj-Sirjan Zone	Metapelite	Amphibolite (Hornfels)	Crd + Kfs Hornfels		Metamorphic	EMPA		10.0855	0.322142	0.0842637	179.69		55.1479
https://doi.org/10.1007/s00531-020-01893-x	[0010]	H101-m30		OROGEN	Iran	Hamadan metamorphic Complex / Sanandaj-Sirjan Zone	Metapelite	Amphibolite (Hornfels)	Crd + Kfs Hornfels		Metamorphic	EMPA		4.49145	0.466393	0.0535628	211.921		102.336
https://doi.org/10.1007/s00531-020-01893-x	[0010]	H101-m31		OROGEN	Iran	Hamadan metamorphic Complex / Sanandaj-Sirjan Zone	Metapelite	Amphibolite (Hornfels)	Crd + Kfs Hornfels		Metamorphic	EMPA		9.8098	0.271958	0.0672628	149.381		57.4543
https://doi.org/10.1007/s00531-020-01893-x	[0010]	H101-m32		OROGEN	Iran	Hamadan metamorphic Complex / Sanandaj-Sirjan Zone	Metapelite	Amphibolite (Hornfels)	Crd + Kfs Hornfels		Metamorphic	EMPA		6.29824	0.270841	0.058636	193.863		85.5278
https://doi.org/10.1007/s00531-020-01893-x	[0010]	H101-m33-1		OROGEN	Iran	Hamadan metamorphic Complex / Sanandaj-Sirjan Zone	Metapelite	Amphibolite (Hornfels)	Crd + Kfs Hornfels		Metamorphic	EMPA		3.38884	0.490607	0.0529333	252.132		123.242
https://doi.org/10.1007/s00531-020-01893-x	[0010]	H101-m33-2		OROGEN	Iran	Hamadan metamorphic Complex / Sanandaj-Sirjan Zone	Metapelite	Amphibolite (Hornfels)	Crd + Kfs Hornfels		Metamorphic	EMPA		5.25408	0.234195	0.0447183	176.607		102.134
https://doi.org/10.1007/s00531-020-01893-x	[0010]	H101-m33-3		OROGEN	Iran	Hamadan metamorphic Complex / Sanandaj-Sirjan Zone	Metapelite	Amphibolite (Hornfels)	Crd + Kfs Hornfels		Metamorphic	EMPA		17.1234	0.190421	0.131104	175.309		34.5721
https://doi.org/10.1007/s00531-020-01893-x	[0010]	H101-m34		OROGEN	Iran	Hamadan metamorphic Complex / Sanandaj-Sirjan Zone	Metapelite	Amphibolite (Hornfels)	Crd + Kfs Hornfels		Metamorphic	EMPA		3.73006	0.340901	0.0432347	212.231		127.021
https://doi.org/10.1007/s00531-020-01893-x	[0010]	H101-m35-2		OROGEN	Iran	Hamadan metamorphic Complex / Sanandaj-Sirjan Zone	Metapelite	Amphibolite (Hornfels)	Crd + Kfs Hornfels		Metamorphic	EMPA		4.26868	0.466551	0.0500132	205.53		106.309
https://doi.org/10.1007/s00531-020-01893-x	[0010]	H101-m35-4		OROGEN	Iran	Hamadan metamorphic Complex / Sanandaj-Sirjan Zone	Metapelite	Amphibolite (Hornfels)	Crd + Kfs Hornfels		Metamorphic	EMPA		1.94074	0.197935	0.0127929	118.423		238.836
https://doi.org/10.1007/s00531-020-01893-x	[0010]	H101-m36		OROGEN	Iran	Hamadan metamorphic Complex / Sanandaj-Sirjan Zone	Metapelite	Amphibolite (Hornfels)	Crd + Kfs Hornfels		Metamorphic	EMPA		4.23904	0.302448	0.0314875	143.471		117.921
https://doi.org/10.1007/s00531-020-01893-x	[0010]	H101-m37-1		OROGEN	Iran	Hamadan metamorphic Complex / Sanandaj-Sirjan Zone	Metapelite	Amphibolite (Hornfels)	Crd + Kfs Hornfels		Metamorphic	EMPA		4.65847	0.518455	0.0410506	154.268		97.1769
https://doi.org/10.1007/s00531-020-01893-x	[0010]	H101-m38		OROGEN	Iran	Hamadan metamorphic Complex / Sanandaj-Sirjan Zone	Metapelite	Amphibolite (Hornfels)	Crd + Kfs Hornfels		Metamorphic	EMPA		3.33174	0.294942	0.0393881	218.36		143.187
https://doi.org/10.1007/s00531-020-01893-x	[0010]	H11-m8-1		OROGEN	Iran	Hamadan metamorphic Complex / Sanandaj-Sirjan Zone	Metapelite	Amphibolite	Sillimanite Schist		Metamorphic	EMPA		3.66208	0.819192	0.050046	189.039		97.5687
https://doi.org/10.1007/s00531-020-01893-x	[0010]	H11-m9		OROGEN	Iran	Hamadan metamorphic Complex / Sanandaj-Sirjan Zone	Metapelite	Amphibolite	Sillimanite Schist		Metamorphic	EMPA		8.12228	0.370956	0.0820649	208.888		65.7914
https://doi.org/10.1007/s00531-020-01893-x	[0010]	H11-m10-1		OROGEN	Iran	Hamadan metamorphic Complex / Sanandaj-Sirjan Zone	Metapelite	Amphibolite	Sillimanite Schist		Metamorphic	EMPA		6.17159	0.622511	0.0755353	219.032		74.9896
https://doi.org/10.1007/s00531-020-01893-x	[0010]	H11-m10-2		OROGEN	Iran	Hamadan metamorphic Complex / Sanandaj-Sirjan Zone	Metapelite	Amphibolite	Sillimanite Schist		Metamorphic	EMPA		11.1658	0.169949	0.102861	208.144		52.3084
https://doi.org/10.1007/s00531-020-01893-x	[0010]	H11-m11		OROGEN	Iran	Hamadan metamorphic Complex / Sanandaj-Sirjan Zone	Metapelite	Amphibolite	Sillimanite Schist		Metamorphic	EMPA		3.52853	0.763654	0.0715463	282.535		102.121
https://doi.org/10.1007/s00531-020-01893-x	[0010]	H11-m13		OROGEN	Iran	Hamadan metamorphic Complex / Sanandaj-Sirjan Zone	Metapelite	Amphibolite	Sillimanite Schist		Metamorphic	EMPA		5.64764	0.4101	0.0490783	167.463		88.1384
https://doi.org/10.1007/s00531-020-01893-x	[0010]	H11-m14		OROGEN	Iran	Hamadan metamorphic Complex / Sanandaj-Sirjan Zone	Metapelite	Amphibolite	Sillimanite Schist		Metamorphic	EMPA		5.02919	1.08863	0.0337343	94.4088		72.3902
https://doi.org/10.1007/s00531-020-01893-x	[0010]	H11-m15		OROGEN	Iran	Hamadan metamorphic Complex / Sanandaj-Sirjan Zone	Metapelite	Amphibolite	Sillimanite Schist		Metamorphic	EMPA		12.4625	0.152344	0.093963	172.022		47.3454
https://doi.org/10.1007/s00531-020-01893-x	[0010]	H11-m19		OROGEN	Iran	Hamadan metamorphic Complex / Sanandaj-Sirjan Zone	Metapelite	Amphibolite	Sillimanite Schist		Metamorphic	EMPA		5.72502	0.308592	0.0398256	141.008		91.4645
https://doi.org/10.1007/s00531-020-01893-x	[0010]	H11-m20		OROGEN	Iran	Hamadan metamorphic Complex / Sanandaj-Sirjan Zone	Metapelite	Amphibolite	Sillimanite Schist		Metamorphic	EMPA		7.51863	0.465491	0.0658709	173.32		68.0798
https://doi.org/10.1007/s00531-020-01893-x	[0010]	H11-m21		OROGEN	Iran	Hamadan metamorphic Complex / Sanandaj-Sirjan Zone	Metapelite	Amphibolite	Sillimanite Schist		Metamorphic	EMPA		6.32468	0.224398	0.044137	148.856		87.1352
https://doi.org/10.1007/s00531-020-01893-x	[0010]	H11-m22		OROGEN	Iran	Hamadan metamorphic Complex / Sanandaj-Sirjan Zone	Metapelite	Amphibolite	Sillimanite Schist		Metamorphic	EMPA		4.1685	1.01695	0.0664673	212.063		82.4879
https://doi.org/10.1007/s00531-020-01893-x	[0010]	H11-m26		OROGEN	Iran	Hamadan metamorphic Complex / Sanandaj-Sirjan Zone	Metapelite	Amphibolite	Sillimanite Schist		Metamorphic	EMPA		3.77748	0.644229	0.0352301	143.376		105.23
https://doi.org/10.1007/s00531-020-01893-x	[0010]	H11-m27		OROGEN	Iran	Hamadan metamorphic Complex / Sanandaj-Sirjan Zone	Metapelite	Amphibolite	Sillimanite Schist		Metamorphic	EMPA		8.09424	0.178248	0.105743	288.554		70.5224
https://doi.org/10.1007/s00531-020-01893-x	[0010]	H11-m28		OROGEN	Iran	Hamadan metamorphic Complex / Sanandaj-Sirjan Zone	Metapelite	Amphibolite	Sillimanite Schist		Metamorphic	EMPA		2.95617	0.290265	0.0242623	148.165		158.043
https://doi.org/10.1007/s00531-020-01893-x	[0010]	H11-m30		OROGEN	Iran	Hamadan metamorphic Complex / Sanandaj-Sirjan Zone	Metapelite	Amphibolite	Sillimanite Schist		Metamorphic	EMPA		4.31203	0.946869	0.0214715	69.6886		84.0466
https://doi.org/10.1007/s00531-020-01893-x	[0010]	H11-m31		OROGEN	Iran	Hamadan metamorphic Complex / Sanandaj-Sirjan Zone	Metapelite	Amphibolite	Sillimanite Schist		Metamorphic	EMPA		4.03315	0.942641	0.0531385	178.749		87.0176
https://doi.org/10.1007/s00531-020-01893-x	[0010]	H11-m32		OROGEN	Iran	Hamadan metamorphic Complex / Sanandaj-Sirjan Zone	Metapelite	Amphibolite	Sillimanite Schist		Metamorphic	EMPA		10.3448	0.226569	0.0664721	142.524		55.4389
https://doi.org/10.1007/s00531-020-01893-x	[0010]	H11-m34		OROGEN	Iran	Hamadan metamorphic Complex / Sanandaj-Sirjan Zone	Metapelite	Amphibolite	Sillimanite Schist		Metamorphic	EMPA		4.09469	0.918469	0.0830974	278.609		86.7265
https://doi.org/10.1007/s00531-020-01893-x	[0010]	H11-m36		OROGEN	Iran	Hamadan metamorphic Complex / Sanandaj-Sirjan Zone	Metapelite	Amphibolite	Sillimanite Schist		Metamorphic	EMPA		4.70232	0.996628	0.049252	148.257		77.8591
https://doi.org/10.1007/s00531-020-01893-x	[0010]	H11-m37		OROGEN	Iran	Hamadan metamorphic Complex / Sanandaj-Sirjan Zone	Metapelite	Amphibolite	Sillimanite Schist		Metamorphic	EMPA		12.6331	0.17281	0.0777953	140.008		46.5401
https://doi.org/10.1007/s00531-020-01893-x	[0010]	H11-m38		OROGEN	Iran	Hamadan metamorphic Complex / Sanandaj-Sirjan Zone	Metapelite	Amphibolite	Sillimanite Schist		Metamorphic	EMPA		8.20239	0.177487	0.0539121	145.762		69.9657
https://doi.org/10.1007/s00531-020-01893-x	[0010]	H11-m40		OROGEN	Iran	Hamadan metamorphic Complex / Sanandaj-Sirjan Zone	Metapelite	Amphibolite	Sillimanite Schist		Metamorphic	EMPA		5.19383	0.608994	0.0389265	129.434		86.0503
https://doi.org/10.1007/s00531-020-01893-x	[0010]	H11-m42		OROGEN	Iran	Hamadan metamorphic Complex / Sanandaj-Sirjan Zone	Metapelite	Amphibolite	Sillimanite Schist		Metamorphic	EMPA		6.70792	1.04157	0.0685289	162.004		61.1336
https://doi.org/10.1007/s00531-020-01893-x	[0010]	H11-m43		OROGEN	Iran	Hamadan metamorphic Complex / Sanandaj-Sirjan Zone	Metapelite	Amphibolite	Sillimanite Schist		Metamorphic	EMPA		6.95667	0.600297	0.0431554	115.702		69.2483
https://doi.org/10.1007/s00531-020-01893-x	[0010]	H11-m44		OROGEN	Iran	Hamadan metamorphic Complex / Sanandaj-Sirjan Zone	Metapelite	Amphibolite	Sillimanite Schist		Metamorphic	EMPA		9.23664	0.248286	0.0645908	152.906		61.1625
https://doi.org/10.1007/s00531-020-01893-x	[0010]	H11-m48		OROGEN	Iran	Hamadan metamorphic Complex / Sanandaj-Sirjan Zone	Metapelite	Amphibolite	Sillimanite Schist		Metamorphic	EMPA		8.79207	0.172831	0.0670181	170.051		65.6145
https://doi.org/10.1007/s00531-020-01893-x	[0010]	H11-m49		OROGEN	Iran	Hamadan metamorphic Complex / Sanandaj-Sirjan Zone	Metapelite	Amphibolite	Sillimanite Schist		Metamorphic	EMPA		12.6991	0.138253	0.0968312	174.747		46.6511
https://doi.org/10.1007/s00531-020-01893-x	[0010]	H11-m50		OROGEN	Iran	Hamadan metamorphic Complex / Sanandaj-Sirjan Zone	Metapelite	Amphibolite	Sillimanite Schist		Metamorphic	EMPA		11.7795	0.143678	0.0795818	154.323		50.1183
https://doi.org/10.1007/s00531-020-01893-x	[0010]	H11-m52		OROGEN	Iran	Hamadan metamorphic Complex / Sanandaj-Sirjan Zone	Metapelite	Amphibolite	Sillimanite Schist		Metamorphic	EMPA		5.45202	0.19673	0.0423612	165.15		100.855
https://doi.org/10.1007/s00531-020-01893-x	[0010]	H31-m9		OROGEN	Iran	Hamadan metamorphic Complex / Sanandaj-Sirjan Zone	Metapelite	Amphibolite	Andalusite Schist		Metamorphic	EMPA		7.48177	0.179974	0.0411386	121.308		76.2147
https://doi.org/10.1007/s00531-020-01893-x	[0010]	H31-m11		OROGEN	Iran	Hamadan metamorphic Complex / Sanandaj-Sirjan Zone	Metapelite	Amphibolite	Andalusite Schist		Metamorphic	EMPA		5.94909	0.417985	0.0477594	155.46		84.2223
https://doi.org/10.1007/s00531-020-01893-x	[0010]	H31-m17		OROGEN	Iran	Hamadan metamorphic Complex / Sanandaj-Sirjan Zone	Metapelite	Amphibolite	Andalusite Schist		Metamorphic	EMPA		10.1329	0.190633	0.0670529	148.023		57.115
https://doi.org/10.1007/s00531-020-01893-x	[0010]	H31-m23		OROGEN	Iran	Hamadan metamorphic Complex / Sanandaj-Sirjan Zone	Metapelite	Amphibolite	Andalusite Schist		Metamorphic	EMPA		5.81165	0.217604	0.0416324	151.648		94.2891
https://doi.org/10.1007/s00531-020-01893-x	[0010]	H31-m24		OROGEN	Iran	Hamadan metamorphic Complex / Sanandaj-Sirjan Zone	Metapelite	Amphibolite	Andalusite Schist		Metamorphic	EMPA		7.84875	0.20641	0.0637255	177.713		72.046
https://doi.org/10.1007/s00531-020-01893-x	[0010]	H31-m25		OROGEN	Iran	Hamadan metamorphic Complex / Sanandaj-Sirjan Zone	Metapelite	Amphibolite	Andalusite Schist		Metamorphic	EMPA		4.09049	0.246464	0.0311689	151.468		125.787
https://doi.org/10.1007/s00531-020-01893-x	[0010]	H31-m26		OROGEN	Iran	Hamadan metamorphic Complex / Sanandaj-Sirjan Zone	Metapelite	Amphibolite	Andalusite Schist		Metamorphic	EMPA		5.22648	0.420005	0.0711215	255.858		93.0392
https://doi.org/10.1007/s00531-020-01893-x	[0010]	H31-m27		OROGEN	Iran	Hamadan metamorphic Complex / Sanandaj-Sirjan Zone	Metapelite	Amphibolite	Andalusite Schist		Metamorphic	EMPA		10.6205	0.155694	0.0742394	158.372		55.1659
https://doi.org/10.1007/s00531-020-01893-x	[0010]	H31-m29		OROGEN	Iran	Hamadan metamorphic Complex / Sanandaj-Sirjan Zone	Metapelite	Amphibolite	Andalusite Schist		Metamorphic	EMPA		6.39282	0.14877	0.0438383	151.478		89.3239
https://doi.org/10.1007/s00531-020-01893-x	[0010]	H31-m31		OROGEN	Iran	Hamadan metamorphic Complex / Sanandaj-Sirjan Zone	Metapelite	Amphibolite	Andalusite Schist		Metamorphic	EMPA		10.8156	0.165397	0.0686479	143.559		54.0883
https://doi.org/10.1139/cjes-2019-0043	[0011]	8d-87 A5	8d-87-2A-C9-3	OROGEN	Canada	Mount Douglas Granite / New Brunswick / Acadian Orogen	Granite		Monzogranite / Syenogranite		Igneous	LAICPMS										416	44790		0.1567		0.0082	1.54		0.53				0.59					935		45	1010		190
https://doi.org/10.1139/cjes-2019-0043	[0011]	8d-87 A	8d-87-2A-C11-6	OROGEN	Canada	Mount Douglas Granite / New Brunswick / Acadian Orogen	Granite		Monzogranite / Syenogranite		Igneous	LAICPMS										1209	66800		0.0583		0.0008	0.441		0.023				0.03					365		5	370		15
https://doi.org/10.1139/cjes-2019-0043	[0011]	8d-87 A5	8d-87-2A-C11-4	OROGEN	Canada	Mount Douglas Granite / New Brunswick / Acadian Orogen	Granite		Monzogranite / Syenogranite		Igneous	LAICPMS										2264	29070		0.0605		0.0018	0.473		0.059				0.34					379		11	384		40
https://doi.org/10.1139/cjes-2019-0043	[0011]	8d-87 A	8d-87-2A-C9-4	OROGEN	Canada	Mount Douglas Granite / New Brunswick / Acadian Orogen	Granite		Monzogranite / Syenogranite		Igneous	LAICPMS										1875	56580		0.0607		0.001	0.478		0.053				0.37					380		6	385		36
https://doi.org/10.1139/cjes-2019-0043	[0011]	8d-87 A5	8d-87-2A-C7-4	OROGEN	Canada	Mount Douglas Granite / New Brunswick / Acadian Orogen	Granite		Monzogranite / Syenogranite		Igneous	LAICPMS										1409	32680		0.0589		0.0007	0.444		0.013				0.15					369		5	373		9
https://doi.org/10.1139/cjes-2019-0043	[0011]	8d-87 A	8d-87-2A-C18-9	OROGEN	Canada	Mount Douglas Granite / New Brunswick / Acadian Orogen	Granite		Monzogranite / Syenogranite		Igneous	LAICPMS										1198	33470		0.0585		0.0007	0.44		0.013				0.05					367		4	370		9
https://doi.org/10.1139/cjes-2019-0043	[0011]	8d-87 A5	8d-87-2A-C18-3	OROGEN	Canada	Mount Douglas Granite / New Brunswick / Acadian Orogen	Granite		Monzogranite / Syenogranite		Igneous	LAICPMS										1602	37560		0.0586		0.002	0.435		0.031				0.47					367		13	366		20
https://doi.org/10.1139/cjes-2019-0043	[0011]	8d-87 A	8d-87-2A-C9-6	OROGEN	Canada	Mount Douglas Granite / New Brunswick / Acadian Orogen	Granite		Monzogranite / Syenogranite		Igneous	LAICPMS										1909	71300		0.0569		0.0008	0.425		0.044				0.49					357		5	355		32
https://doi.org/10.1139/cjes-2019-0043	[0011]	8d-87 A5	8d-87-2A-C18-7	OROGEN	Canada	Mount Douglas Granite / New Brunswick / Acadian Orogen	Granite		Monzogranite / Syenogranite		Igneous	LAICPMS										1388	38150		0.0588		0.0007	0.432		0.013				0.21					368		5	364		10
https://doi.org/10.1139/cjes-2019-0043	[0011]	8d-87 A	8d-87-2A-C18-12	OROGEN	Canada	Mount Douglas Granite / New Brunswick / Acadian Orogen	Granite		Monzogranite / Syenogranite		Igneous	LAICPMS										1362	38910		0.0597		0.0009	0.441		0.066				0.6					374		6	365		45
https://doi.org/10.1139/cjes-2019-0043	[0011]	8d-87 A5	8d-87-2A-C18-8	OROGEN	Canada	Mount Douglas Granite / New Brunswick / Acadian Orogen	Granite		Monzogranite / Syenogranite		Igneous	LAICPMS										1781	56900		0.0592		0.0006	0.428		0.013				0.09					370		4	361		9
https://doi.org/10.1139/cjes-2019-0043	[0011]	8d-87 A	8d-87-2A-C11-5	OROGEN	Canada	Mount Douglas Granite / New Brunswick / Acadian Orogen	Granite		Monzogranite / Syenogranite		Igneous	LAICPMS										2826	41420		0.0601		0.0061	0.445		0.2				0.3					376		36	365		93
https://doi.org/10.1139/cjes-2019-0043	[0011]	8d-87 A5	8d-87-2A-C9-7	OROGEN	Canada	Mount Douglas Granite / New Brunswick / Acadian Orogen	Granite		Monzogranite / Syenogranite		Igneous	LAICPMS										1177	70300		0.0595		0.014	0.46		0.76				0.51					372		77	360		180
https://doi.org/10.1139/cjes-2019-0043	[0011]	8d-87 A	8d-87-2A-C18-11	OROGEN	Canada	Mount Douglas Granite / New Brunswick / Acadian Orogen	Granite		Monzogranite / Syenogranite		Igneous	LAICPMS										1587	48080		0.0583		0.0007	0.415		0.049				0.49					365		4	350		34
https://doi.org/10.1139/cjes-2019-0043	[0011]	8d-87 A5	8d-87-2A-C11-3	OROGEN	Canada	Mount Douglas Granite / New Brunswick / Acadian Orogen	Granite		Monzogranite / Syenogranite		Igneous	LAICPMS										1856	30540		0.0599		0.0026	0.433		0.094				0.32					375		16	356		64
https://doi.org/10.1139/cjes-2019-0043	[0011]	8d-87 A	8d-87-2A-C9-8	OROGEN	Canada	Mount Douglas Granite / New Brunswick / Acadian Orogen	Granite		Monzogranite / Syenogranite		Igneous	LAICPMS										2018	41100		0.0576		0.0099	0.406		0.61				0.41					361		57	339		140
https://doi.org/10.1139/cjes-2019-0043	[0011]	8d-87 A5	8d-87-2A-C7-3	OROGEN	Canada	Mount Douglas Granite / New Brunswick / Acadian Orogen	Granite		Monzogranite / Syenogranite		Igneous	LAICPMS										939	37600		0.059		0.0077	0.4		0.18				0.66					369		45	342		110
https://doi.org/10.1139/cjes-2019-0043	[0011]	8d-87 A	8d-87-2A-C9-5	OROGEN	Canada	Mount Douglas Granite / New Brunswick / Acadian Orogen	Granite		Monzogranite / Syenogranite		Igneous	LAICPMS										673	51290		0.0631		0.0014	0.44		0.14				0.75					394		8	363		93
https://doi.org/10.1139/cjes-2019-0043	[0011]	8d-87 A5	8d-87-2A-C18-10	OROGEN	Canada	Mount Douglas Granite / New Brunswick / Acadian Orogen	Granite		Monzogranite / Syenogranite		Igneous	LAICPMS										2868	41890		0.0578		0.0007	0.396		0.039				0.57					362		4	333		30
https://doi.org/10.1139/cjes-2019-0043	[0011]	8d-87 A	8d-87-2A-C11-2	OROGEN	Canada	Mount Douglas Granite / New Brunswick / Acadian Orogen	Granite		Monzogranite / Syenogranite		Igneous	LAICPMS										1697	29280		0.0595		0.0008	0.42		0.053				0.49					373		5	340		39
https://doi.org/10.1139/cjes-2019-0043	[0011]	110-2	110-2-5-C18-4	OROGEN	Canada	Mount Douglas Granite / New Brunswick / Acadian Orogen	Granite		Syenogranite		Igneous	LAICPMS										1598	69400		0.0585		0.0017	0.45		0.12				0.65					367		10	399		100
https://doi.org/10.1139/cjes-2019-0043	[0011]	110-2	110-2-5-C18-17	OROGEN	Canada	Mount Douglas Granite / New Brunswick / Acadian Orogen	Granite		Syenogranite		Igneous	LAICPMS										1858	56500		0.0603		0.002	0.474		0.12				0.34					377		12	392		80
https://doi.org/10.1139/cjes-2019-0043	[0011]	110-2	110-2-3-C18-6	OROGEN	Canada	Mount Douglas Granite / New Brunswick / Acadian Orogen	Granite		Syenogranite		Igneous	LAICPMS										2205	72380		0.0587		0.0006	0.444		0.011				0.36					367		4	373		8
https://doi.org/10.1139/cjes-2019-0043	[0011]	110-2	110-2-5-C18-11	OROGEN	Canada	Mount Douglas Granite / New Brunswick / Acadian Orogen	Granite		Syenogranite		Igneous	LAICPMS										1778	75500		0.0596		0.0007	0.452		0.013				0.24					373		4	378		9
https://doi.org/10.1139/cjes-2019-0043	[0011]	110-2	110-2-5-C18-12	OROGEN	Canada	Mount Douglas Granite / New Brunswick / Acadian Orogen	Granite		Syenogranite		Igneous	LAICPMS										2973	77300		0.0586		0.0007	0.442		0.011				0.21					367		4	372		8
https://doi.org/10.1139/cjes-2019-0043	[0011]	110-2	110-2-5-C18-19	OROGEN	Canada	Mount Douglas Granite / New Brunswick / Acadian Orogen	Granite		Syenogranite		Igneous	LAICPMS										1512	19000		0.0583		0.0006	0.438		0.013				0.04					366		4	368		9
https://doi.org/10.1139/cjes-2019-0043	[0011]	110-2	110-2-3-C8-1	OROGEN	Canada	Mount Douglas Granite / New Brunswick / Acadian Orogen	Granite		Syenogranite		Igneous	LAICPMS										1501	19220		0.0587		0.0014	0.436		0.1				0.5					368		8	370		53
https://doi.org/10.1139/cjes-2019-0043	[0011]	110-2	110-2-5-C18-6	OROGEN	Canada	Mount Douglas Granite / New Brunswick / Acadian Orogen	Granite		Syenogranite		Igneous	LAICPMS										2041	74900		0.0596		0.0007	0.449		0.012				0.13					373		4	376		9
https://doi.org/10.1139/cjes-2019-0043	[0011]	110-2	110-2-5-C18-20	OROGEN	Canada	Mount Douglas Granite / New Brunswick / Acadian Orogen	Granite		Syenogranite		Igneous	LAICPMS										1472	34400		0.0592		0.0012	0.441		0.051				0.31					371		7	370		29
https://doi.org/10.1139/cjes-2019-0043	[0011]	110-2	110-2-4-C2-2	OROGEN	Canada	Mount Douglas Granite / New Brunswick / Acadian Orogen	Granite		Syenogranite		Igneous	LAICPMS										3660	119700		0.058		0.0007	0.432		0.029				0.36					363		4	361		20
https://doi.org/10.1139/cjes-2019-0043	[0011]	110-2	110-2-4-C11-2	OROGEN	Canada	Mount Douglas Granite / New Brunswick / Acadian Orogen	Granite		Syenogranite		Igneous	LAICPMS										1237	22040		0.0582		0.0014	0.43		0.12				0.26					365		8	362		57
https://doi.org/10.1139/cjes-2019-0043	[0011]	110-2	110-2-5-C18-10	OROGEN	Canada	Mount Douglas Granite / New Brunswick / Acadian Orogen	Granite		Syenogranite		Igneous	LAICPMS										2019	74810		0.0602		0.0007	0.444		0.011				0.29					377		4	372		8
https://doi.org/10.1139/cjes-2019-0043	[0011]	110-2	110-2-5-C5-7	OROGEN	Canada	Mount Douglas Granite / New Brunswick / Acadian Orogen	Granite		Syenogranite		Igneous	LAICPMS										1315	22780		0.0581		0.0009	0.426		0.047				0.1					364		6	359		28
https://doi.org/10.1139/cjes-2019-0043	[0011]	110-2	110-2-5-C18-15	OROGEN	Canada	Mount Douglas Granite / New Brunswick / Acadian Orogen	Granite		Syenogranite		Igneous	LAICPMS										1608	44360		0.0593		0.0007	0.433		0.012				0.27					371		4	364		9
https://doi.org/10.1139/cjes-2019-0043	[0011]	110-2	110-2-4-C4-3	OROGEN	Canada	Mount Douglas Granite / New Brunswick / Acadian Orogen	Granite		Syenogranite		Igneous	LAICPMS										1987	51510		0.059		0.0039	0.435		0.11				0.65					369		23	359		63
https://doi.org/10.1139/cjes-2019-0043	[0011]	110-2	110-2-4-C2-4	OROGEN	Canada	Mount Douglas Granite / New Brunswick / Acadian Orogen	Granite		Syenogranite		Igneous	LAICPMS										2619	95220		0.0592		0.0007	0.426		0.052				0.55					371		5	355		38
https://doi.org/10.1139/cjes-2019-0043	[0011]	110-2	110-2-3-C8-2	OROGEN	Canada	Mount Douglas Granite / New Brunswick / Acadian Orogen	Granite		Syenogranite		Igneous	LAICPMS										1546	14020		0.0593		0.0021	0.418		0.14				0.2					372		12	354		67
https://doi.org/10.1139/cjes-2019-0043	[0011]	110-2	110-2-5-C18-8	OROGEN	Canada	Mount Douglas Granite / New Brunswick / Acadian Orogen	Granite		Syenogranite		Igneous	LAICPMS										2547	90000		0.0595		0.0007	0.422		0.032				0.36					373		4	353		23
https://doi.org/10.1139/cjes-2019-0043	[0011]	110-2	110-2-5-C18-3	OROGEN	Canada	Mount Douglas Granite / New Brunswick / Acadian Orogen	Granite		Syenogranite		Igneous	LAICPMS										2283	87000		0.0606		0.0007	0.435		0.04				0.6					379		4	359		28
https://doi.org/10.1139/cjes-2019-0043	[0011]	110-2	110-2-3-C18-1	OROGEN	Canada	Mount Douglas Granite / New Brunswick / Acadian Orogen	Granite		Syenogranite		Igneous	LAICPMS										1929	56400		0.0605		0.0008	0.439		0.047				0.5					379		5	357		35
https://doi.org/10.1139/cjes-2019-0043	[0011]	110-2	110-2-4-C12-2	OROGEN	Canada	Mount Douglas Granite / New Brunswick / Acadian Orogen	Granite		Syenogranite		Igneous	LAICPMS										1504	27670		0.0574		0.0009	0.4		0.055				0.58					360		5	337		40
https://doi.org/10.1139/cjes-2019-0043	[0011]	110-2	110-2-3-C8-3	OROGEN	Canada	Mount Douglas Granite / New Brunswick / Acadian Orogen	Granite		Syenogranite		Igneous	LAICPMS										1579	14080		0.0595		0.0011	0.428		0.095				0.47					373		7	348		70
https://doi.org/10.1139/cjes-2019-0043	[0011]	110-2	110-2-5-C18-9	OROGEN	Canada	Mount Douglas Granite / New Brunswick / Acadian Orogen	Granite		Syenogranite		Igneous	LAICPMS										1940	71200		0.0569		0.0012	0.416		0.074				0.5					357		8	329		54
https://doi.org/10.1139/cjes-2019-0043	[0011]	110-2	110-2-3-C18-3	OROGEN	Canada	Mount Douglas Granite / New Brunswick / Acadian Orogen	Granite		Syenogranite		Igneous	LAICPMS										2119	61000		0.0583		0.0007	0.405		0.044				0.64					365		4	336		34
https://doi.org/10.1139/cjes-2019-0043	[0011]	110-2	110-2-4-C8-2	OROGEN	Canada	Mount Douglas Granite / New Brunswick / Acadian Orogen	Granite		Syenogranite		Igneous	LAICPMS										3242	108000		0.0592		0.0012	0.45		0.12				0.68					371		7	340		84
https://doi.org/10.1139/cjes-2019-0043	[0011]	110-2	110-2-5-C18-5	OROGEN	Canada	Mount Douglas Granite / New Brunswick / Acadian Orogen	Granite		Syenogranite		Igneous	LAICPMS										2028	73940		0.0558		0.0016	0.419		0.085				0.51					350		10	320		63
https://doi.org/10.1139/cjes-2019-0043	[0011]	110-2	110-2-4-C2-1	OROGEN	Canada	Mount Douglas Granite / New Brunswick / Acadian Orogen	Granite		Syenogranite		Igneous	LAICPMS										3206	107700		0.0603		0.0022	0.437		0.091				0.56					378		13	345		62
https://doi.org/10.1139/cjes-2019-0043	[0011]	110-2	110-2-3-C1-1	OROGEN	Canada	Mount Douglas Granite / New Brunswick / Acadian Orogen	Granite		Syenogranite		Igneous	LAICPMS										2166	89900		0.059		0.0034	0.405		0.18				0.53					370		20	336		120
https://doi.org/10.1139/cjes-2019-0043	[0011]	110-2	110-2-3-C18-4	OROGEN	Canada	Mount Douglas Granite / New Brunswick / Acadian Orogen	Granite		Syenogranite		Igneous	LAICPMS										2471	77500		0.0578		0.0012	0.381		0.039				0.55					362		7	328		28
https://doi.org/10.1139/cjes-2019-0043	[0011]	110-2	110-2-4-C1-5	OROGEN	Canada	Mount Douglas Granite / New Brunswick / Acadian Orogen	Granite		Syenogranite		Igneous	LAICPMS										1927	83300		0.0647		0.001	0.485		0.076				0.62					404		6	392		50
https://doi.org/10.1139/cjes-2019-0043	[0011]	110-2	110-2-4-C11-7	OROGEN	Canada	Mount Douglas Granite / New Brunswick / Acadian Orogen	Granite		Syenogranite		Igneous	LAICPMS										1811	25680		0.0647		0.0015	0.5		0.11				0.6					404		9	387		79
https://doi.org/10.1139/cjes-2019-0043	[0011]	110-2	110-2-5-C5-8	OROGEN	Canada	Mount Douglas Granite / New Brunswick / Acadian Orogen	Granite		Syenogranite		Igneous	LAICPMS										1359	14970		0.0695		0.0018	0.52		0.16				0.74					433		11	400		110
https://doi.org/10.1139/cjes-2019-0043	[0011]	50-C3	50-C3-5-C7-1	OROGEN	Canada	Mount Douglas Granite / New Brunswick / Acadian Orogen	Granite		Syenogranite		Igneous	LAICPMS											113500		0.0582		0.0011	0.429		0.015				0.194					365		7	362		11
https://doi.org/10.1139/cjes-2019-0043	[0011]	50-C3	50-C3-4-C10-5	OROGEN	Canada	Mount Douglas Granite / New Brunswick / Acadian Orogen	Granite		Syenogranite		Igneous	LAICPMS											34790		0.0585		0.0008	0.432		0.009				0.33					366		5	364		7
https://doi.org/10.1139/cjes-2019-0043	[0011]	50-C3	50-C3-5-C15-3	OROGEN	Canada	Mount Douglas Granite / New Brunswick / Acadian Orogen	Granite		Syenogranite		Igneous	LAICPMS											40470		0.0586		0.001	0.444		0.014				0.272					367		6	373		10
https://doi.org/10.1139/cjes-2019-0043	[0011]	50-C3	50-C3-4-C7-10	OROGEN	Canada	Mount Douglas Granite / New Brunswick / Acadian Orogen	Granite		Syenogranite		Igneous	LAICPMS											15030		0.0587		0.0009	0.443		0.013				0.301					368		6	372		9
https://doi.org/10.1139/cjes-2019-0043	[0011]	50-C3	50-C3-4-C7-13	OROGEN	Canada	Mount Douglas Granite / New Brunswick / Acadian Orogen	Granite		Syenogranite		Igneous	LAICPMS										1706	31600		0.0587		0.0009	0.437		0.012				0.187					368		5	367		8
https://doi.org/10.1139/cjes-2019-0043	[0011]	50-C3	50-C3-4-C9-3	OROGEN	Canada	Mount Douglas Granite / New Brunswick / Acadian Orogen	Granite		Syenogranite		Igneous	LAICPMS										1493	18600		0.0587		0.0008	0.431		0.011				0.138					368		5	364		8
https://doi.org/10.1139/cjes-2019-0043	[0011]	50-C3	50-C3-4-C10-4	OROGEN	Canada	Mount Douglas Granite / New Brunswick / Acadian Orogen	Granite		Syenogranite		Igneous	LAICPMS										1657	27680		0.0588		0.0007	0.435		0.009				0.252					369		4	366		7
https://doi.org/10.1139/cjes-2019-0043	[0011]	50-C3	50-C3-5-C14-1	OROGEN	Canada	Mount Douglas Granite / New Brunswick / Acadian Orogen	Granite		Syenogranite		Igneous	LAICPMS										1943	35400		0.0588		0.0011	0.432		0.012				0.118					368		7	364		8
https://doi.org/10.1139/cjes-2019-0043	[0011]	50-C3	50-C3-4-C7-2	OROGEN	Canada	Mount Douglas Granite / New Brunswick / Acadian Orogen	Granite		Syenogranite		Igneous	LAICPMS										1562	32800		0.0589		0.0009	0.44		0.013				0.154					369		6	369		9
https://doi.org/10.1139/cjes-2019-0043	[0011]	50-C3	50-C3-5-C1-5	OROGEN	Canada	Mount Douglas Granite / New Brunswick / Acadian Orogen	Granite		Syenogranite		Igneous	LAICPMS										1721	51600		0.0589		0.0011	0.439		0.017				0.486					369		6	369		12
https://doi.org/10.1139/cjes-2019-0043	[0011]	50-C3	50-C3-4-C13-6	OROGEN	Canada	Mount Douglas Granite / New Brunswick / Acadian Orogen	Granite		Syenogranite		Igneous	LAICPMS										1966	52600		0.0589		0.0013	0.438		0.017				0.283					369		8	368		12
https://doi.org/10.1139/cjes-2019-0043	[0011]	50-C3	50-C3-3-C13-5	OROGEN	Canada	Mount Douglas Granite / New Brunswick / Acadian Orogen	Granite		Syenogranite		Igneous	LAICPMS										4703	103600		0.059		0.0007	0.44		0.007				0.142					369		4	370		5
https://doi.org/10.1139/cjes-2019-0043	[0011]	50-C3	50-C3-4-C7-12	OROGEN	Canada	Mount Douglas Granite / New Brunswick / Acadian Orogen	Granite		Syenogranite		Igneous	LAICPMS										1816	33120		0.059		0.001	0.439		0.013				0.305					370		6	369		9
https://doi.org/10.1139/cjes-2019-0043	[0011]	50-C3	50-C3-4-C3-2	OROGEN	Canada	Mount Douglas Granite / New Brunswick / Acadian Orogen	Granite		Syenogranite		Igneous	LAICPMS										2215	100200		0.0591		0.0008	0.442		0.01				0.143					370		5	371		7
https://doi.org/10.1139/cjes-2019-0043	[0011]	50-C3	50-C3-3-C7-1	OROGEN	Canada	Mount Douglas Granite / New Brunswick / Acadian Orogen	Granite		Syenogranite		Igneous	LAICPMS										3075	79000		0.0592		0.0009	0.439		0.016				0.435					371		6	369		11
https://doi.org/10.1139/cjes-2019-0043	[0011]	50-C3	50-C3-5-C2-4	OROGEN	Canada	Mount Douglas Granite / New Brunswick / Acadian Orogen	Granite		Syenogranite		Igneous	LAICPMS										2915	116800		0.0593		0.0009	0.436		0.014				0.381					371		5	367		10
https://doi.org/10.1139/cjes-2019-0043	[0011]	50-C3	50-C3-3-C11-7	OROGEN	Canada	Mount Douglas Granite / New Brunswick / Acadian Orogen	Granite		Syenogranite		Igneous	LAICPMS										1815	49830		0.0594		0.0007	0.44		0.01				0.181					372		4	370		7
https://doi.org/10.1139/cjes-2019-0043	[0011]	50-C3	50-C3-5-C1-4	OROGEN	Canada	Mount Douglas Granite / New Brunswick / Acadian Orogen	Granite		Syenogranite		Igneous	LAICPMS										1876	90200		0.0595		0.0009	0.446		0.014				0.032					373		6	374		10
https://doi.org/10.1139/cjes-2019-0043	[0011]	50-C3	50-C3-4-C11-2	OROGEN	Canada	Mount Douglas Granite / New Brunswick / Acadian Orogen	Granite		Syenogranite		Igneous	LAICPMS										2116	77400		0.0596		0.0008	0.446		0.012				0.301					373		5	374		8
https://doi.org/10.1139/cjes-2019-0043	[0011]	50-C3	50-C3-5-C15-4	OROGEN	Canada	Mount Douglas Granite / New Brunswick / Acadian Orogen	Granite		Syenogranite		Igneous	LAICPMS										2138	63900		0.0596		0.0009	0.443		0.013				0.288					373		6	372		9
https://doi.org/10.1139/cjes-2019-0043	[0011]	50-C3	50-C3-3-C4-1	OROGEN	Canada	Mount Douglas Granite / New Brunswick / Acadian Orogen	Granite		Syenogranite		Igneous	LAICPMS										3048	70580		0.0597		0.0007	0.446		0.008				0.324					374		4	374		6
https://doi.org/10.1139/cjes-2019-0043	[0011]	50-C3	50-C3-3-C16-4	OROGEN	Canada	Mount Douglas Granite / New Brunswick / Acadian Orogen	Granite		Syenogranite		Igneous	LAICPMS										2905	60100		0.0597		0.0009	0.443		0.009				0.474					374		5	373		6
https://doi.org/10.1139/cjes-2019-0043	[0011]	50-C3	50-C3-5-C3-5	OROGEN	Canada	Mount Douglas Granite / New Brunswick / Acadian Orogen	Granite		Syenogranite		Igneous	LAICPMS										1838	49400		0.0597		0.001	0.438		0.014				0.314					374		6	369		10
https://doi.org/10.1139/cjes-2019-0043	[0011]	50-C3	50-C3-4-C6-4	OROGEN	Canada	Mount Douglas Granite / New Brunswick / Acadian Orogen	Granite		Syenogranite		Igneous	LAICPMS										2402	100800		0.0598		0.0011	0.452		0.012				0.303					375		6	379		8
https://doi.org/10.1139/cjes-2019-0043	[0011]	50-C3	50-C3-5-C1-2	OROGEN	Canada	Mount Douglas Granite / New Brunswick / Acadian Orogen	Granite		Syenogranite		Igneous	LAICPMS										1383	33860		0.0598		0.0012	0.446		0.018				0.321					374		7	374		12
https://doi.org/10.1139/cjes-2019-0043	[0011]	50-C3	50-C3-3-C18-3	OROGEN	Canada	Mount Douglas Granite / New Brunswick / Acadian Orogen	Granite		Syenogranite		Igneous	LAICPMS										1824	53410		0.0599		0.0008	0.452		0.01				0.239					375		5	379		7
https://doi.org/10.1139/cjes-2019-0043	[0011]	50-C3	50-C3-3-C11-1	OROGEN	Canada	Mount Douglas Granite / New Brunswick / Acadian Orogen	Granite		Syenogranite		Igneous	LAICPMS										1854	53390		0.0599		0.0008	0.451		0.013				0.349					375		5	378		9
https://doi.org/10.1139/cjes-2019-0043	[0011]	50-C3	50-C3-5-C3-4	OROGEN	Canada	Mount Douglas Granite / New Brunswick / Acadian Orogen	Granite		Syenogranite		Igneous	LAICPMS										2035	57500		0.0599		0.001	0.446		0.013				0.512					375		6	374		9
https://doi.org/10.1139/cjes-2019-0043	[0011]	50-C3	50-C3-4-C9-1	OROGEN	Canada	Mount Douglas Granite / New Brunswick / Acadian Orogen	Granite		Syenogranite		Igneous	LAICPMS										1520	30220		0.0599		0.0008	0.444		0.011				0.242					375		5	372		7
https://doi.org/10.1139/cjes-2019-0043	[0011]	50-C3	50-C3-3-C15-2	OROGEN	Canada	Mount Douglas Granite / New Brunswick / Acadian Orogen	Granite		Syenogranite		Igneous	LAICPMS										2460	71000		0.06		0.0008	0.446		0.01				0.318					376		5	374		7
https://doi.org/10.1139/cjes-2019-0043	[0011]	50-C3	50-C3-3-C16-3	OROGEN	Canada	Mount Douglas Granite / New Brunswick / Acadian Orogen	Granite		Syenogranite		Igneous	LAICPMS										2416	53110		0.06		0.0008	0.439		0.009				0.205					376		5	369		6
https://doi.org/10.1139/cjes-2019-0043	[0011]	50-C3	50-C3-5-C1-3	OROGEN	Canada	Mount Douglas Granite / New Brunswick / Acadian Orogen	Granite		Syenogranite		Igneous	LAICPMS										1349	21700		0.06		0.0011	0.439		0.017				0.403					376		6	369		12
https://doi.org/10.1139/cjes-2019-0043	[0011]	50-C3	50-C3-3-C15-1	OROGEN	Canada	Mount Douglas Granite / New Brunswick / Acadian Orogen	Granite		Syenogranite		Igneous	LAICPMS										2230	53200		0.06		0.0007	0.438		0.009				0.172					376		5	369		6
https://doi.org/10.1139/cjes-2019-0043	[0011]	50-C3	50-C3-3-C11-6	OROGEN	Canada	Mount Douglas Granite / New Brunswick / Acadian Orogen	Granite		Syenogranite		Igneous	LAICPMS										1926	70300		0.0601		0.0008	0.447		0.013				0.26					376		5	375		9
https://doi.org/10.1139/cjes-2019-0043	[0011]	50-C3	50-C3-5-C5-3	OROGEN	Canada	Mount Douglas Granite / New Brunswick / Acadian Orogen	Granite		Syenogranite		Igneous	LAICPMS										2926	130800		0.0601		0.0013	0.446		0.015				0.536					376		8	374		11
https://doi.org/10.1139/cjes-2019-0043	[0011]	50-C3	50-C3-3-C10-1	OROGEN	Canada	Mount Douglas Granite / New Brunswick / Acadian Orogen	Granite		Syenogranite		Igneous	LAICPMS										2867	68880		0.0601		0.0007	0.445		0.008				0.161					377		4	373		6
https://doi.org/10.1139/cjes-2019-0043	[0011]	50-C3	50-C3-3-C7-3	OROGEN	Canada	Mount Douglas Granite / New Brunswick / Acadian Orogen	Granite		Syenogranite		Igneous	LAICPMS										2441	70390		0.0602		0.0007	0.442		0.009				0.059					377		4	371		6
https://doi.org/10.1139/cjes-2019-0043	[0011]	50-C3	50-C3-3-C7-2	OROGEN	Canada	Mount Douglas Granite / New Brunswick / Acadian Orogen	Granite		Syenogranite		Igneous	LAICPMS										2418	71330		0.0604		0.0007	0.457		0.01				0.084					378		4	382		7
https://doi.org/10.1139/cjes-2019-0043	[0011]	50-C3	50-C3-4-C3-1	OROGEN	Canada	Mount Douglas Granite / New Brunswick / Acadian Orogen	Granite		Syenogranite		Igneous	LAICPMS										2552	79600		0.0604		0.0007	0.452		0.007				0.115					378		4	379		5
https://doi.org/10.1139/cjes-2019-0043	[0011]	50-C3	50-C3-3-C6-4	OROGEN	Canada	Mount Douglas Granite / New Brunswick / Acadian Orogen	Granite		Syenogranite		Igneous	LAICPMS										2118	87700		0.0604		0.0008	0.451		0.01				0.32					378		5	378		7
https://doi.org/10.1139/cjes-2019-0043	[0011]	50-C3	50-C3-5-C12-5	OROGEN	Canada	Mount Douglas Granite / New Brunswick / Acadian Orogen	Granite		Syenogranite		Igneous	LAICPMS										3539	109400		0.0589		0.001	0.428		0.011				0.556					369		6	361		8
https://doi.org/10.1139/cjes-2019-0043	[0011]	50-C3	50-C3-3-C16-1	OROGEN	Canada	Mount Douglas Granite / New Brunswick / Acadian Orogen	Granite		Syenogranite		Igneous	LAICPMS										2163	57520		0.0604		0.0008	0.44		0.008				0.025					378		5	370		6
https://doi.org/10.1139/cjes-2019-0043	[0011]	50-C3	50-C3-5-C14-3	OROGEN	Canada	Mount Douglas Granite / New Brunswick / Acadian Orogen	Granite		Syenogranite		Igneous	LAICPMS										2477	48330		0.059		0.001	0.427		0.011				0.158					369		6	361		8
https://doi.org/10.1139/cjes-2019-0043	[0011]	50-C3	50-C3-5-C13-4	OROGEN	Canada	Mount Douglas Granite / New Brunswick / Acadian Orogen	Granite		Syenogranite		Igneous	LAICPMS										2268	65200		0.059		0.0008	0.427		0.01				0.007					370		5	360		7
https://doi.org/10.1139/cjes-2019-0043	[0011]	50-C3	50-C3-5-C13-3	OROGEN	Canada	Mount Douglas Granite / New Brunswick / Acadian Orogen	Granite		Syenogranite		Igneous	LAICPMS										2587	83000		0.0588		0.0009	0.425		0.011				0.303					368		5	359		8
https://doi.org/10.1139/cjes-2019-0043	[0011]	50-C3	50-C3-5-C12-3	OROGEN	Canada	Mount Douglas Granite / New Brunswick / Acadian Orogen	Granite		Syenogranite		Igneous	LAICPMS										4443	122400		0.0584		0.0008	0.42		0.011				0.09					366		5	356		8
https://doi.org/10.1139/cjes-2019-0043	[0011]	50-C3	50-C3-4-C13-2	OROGEN	Canada	Mount Douglas Granite / New Brunswick / Acadian Orogen	Granite		Syenogranite		Igneous	LAICPMS										1911	77300		0.0587		0.0007	0.422		0.01				0.113					368		5	358		7
https://doi.org/10.1139/cjes-2019-0043	[0011]	50-C3	50-C3-5-C12-2	OROGEN	Canada	Mount Douglas Granite / New Brunswick / Acadian Orogen	Granite		Syenogranite		Igneous	LAICPMS										4533	117000		0.0582		0.001	0.412		0.01				0.037					364		6	352		8
https://doi.org/10.1139/cjes-2019-0043	[0011]	50-C3	50-C3-4-C7-3	OROGEN	Canada	Mount Douglas Granite / New Brunswick / Acadian Orogen	Granite		Syenogranite		Igneous	LAICPMS										3294	105000		0.0584		0.0012	0.447		0.046				0.587					366		7	370		33
https://doi.org/10.1139/cjes-2019-0043	[0011]	50-C3	50-C3-4-C7-8	OROGEN	Canada	Mount Douglas Granite / New Brunswick / Acadian Orogen	Granite		Syenogranite		Igneous	LAICPMS										1683	27620		0.0585		0.001	0.45		0.047				0.66					367		6	369		33
https://doi.org/10.1139/cjes-2019-0043	[0011]	50-C3	50-C3-4-C13-3	OROGEN	Canada	Mount Douglas Granite / New Brunswick / Acadian Orogen	Granite		Syenogranite		Igneous	LAICPMS										1959	76090		0.0579		0.0009	0.438		0.042				0.611					363		5	358		30
https://doi.org/10.1139/cjes-2019-0043	[0011]	50-C3	50-C3-4-C6-5	OROGEN	Canada	Mount Douglas Granite / New Brunswick / Acadian Orogen	Granite		Syenogranite		Igneous	LAICPMS										1970	64900		0.0595		0.001	0.45		0.053				0.723					373		6	366		37
https://doi.org/10.1139/cjes-2019-0043	[0011]	50-C3	50-C3-4-C10-9	OROGEN	Canada	Mount Douglas Granite / New Brunswick / Acadian Orogen	Granite		Syenogranite		Igneous	LAICPMS										1295	18030		0.0599		0.001	0.456		0.06				0.554					375		6	367		41
https://doi.org/10.1139/cjes-2019-0043	[0011]	50-C3	50-C3-4-C7-4	OROGEN	Canada	Mount Douglas Granite / New Brunswick / Acadian Orogen	Granite		Syenogranite		Igneous	LAICPMS										1771	50300		0.0599		0.0008	0.46		0.055				0.608					375		5	366		39
https://doi.org/10.1139/cjes-2019-0043	[0011]	50-C3	50-C3-5-C4-2	OROGEN	Canada	Mount Douglas Granite / New Brunswick / Acadian Orogen	Granite		Syenogranite		Igneous	LAICPMS										2413	66500		0.0598		0.0012	0.46		0.042				0.529					374		7	379		30
https://doi.org/10.1139/cjes-2019-0043	[0011]	50-C3	50-C3-5-C6-1	OROGEN	Canada	Mount Douglas Granite / New Brunswick / Acadian Orogen	Granite		Syenogranite		Igneous	LAICPMS										1945	72600		0.0602		0.0011	0.439		0.055				0.381					377		7	371		36
https://doi.org/10.1139/cjes-2019-0043	[0011]	117-7	117-7-2-C9-6	OROGEN	Canada	Mount Douglas Granite / New Brunswick / Acadian Orogen	Granite		Syenogranite		Igneous	LAICPMS										1987	41000		0.0595		0.0008	0.485		0.012				0.157					373		5	401		8
https://doi.org/10.1139/cjes-2019-0043	[0011]	117-7	117-7-4-C4-5	OROGEN	Canada	Mount Douglas Granite / New Brunswick / Acadian Orogen	Granite		Syenogranite		Igneous	LAICPMS										2329	74490		0.0596		0.0008	0.479		0.012				0.174					373		5	397		8
https://doi.org/10.1139/cjes-2019-0043	[0011]	117-7	117-7-3-C4-3	OROGEN	Canada	Mount Douglas Granite / New Brunswick / Acadian Orogen	Granite		Syenogranite		Igneous	LAICPMS										1771	77700		0.0609		0.0011	0.495		0.057				0.575					381		7	399		38
https://doi.org/10.1139/cjes-2019-0043	[0011]	117-7	117-7-4-C8-1	OROGEN	Canada	Mount Douglas Granite / New Brunswick / Acadian Orogen	Granite		Syenogranite		Igneous	LAICPMS										1059	15900		0.0574		0.0008	0.451		0.014				0.08					360		5	377		10
https://doi.org/10.1139/cjes-2019-0043	[0011]	117-7	117-7-4-C11-1	OROGEN	Canada	Mount Douglas Granite / New Brunswick / Acadian Orogen	Granite		Syenogranite		Igneous	LAICPMS										2698	82600		0.0592		0.0011	0.466		0.047				0.314					371		7	388		27
https://doi.org/10.1139/cjes-2019-0043	[0011]	117-7	117-7-3-C4-2	OROGEN	Canada	Mount Douglas Granite / New Brunswick / Acadian Orogen	Granite		Syenogranite		Igneous	LAICPMS										1684	15420		0.0592		0.0008	0.464		0.017				0.105					371		5	387		11
https://doi.org/10.1139/cjes-2019-0043	[0011]	117-7	117-7-4-C9-7	OROGEN	Canada	Mount Douglas Granite / New Brunswick / Acadian Orogen	Granite		Syenogranite		Igneous	LAICPMS										1490	8336		0.0581		0.0007	0.448		0.011				0.111					364		5	375		8
https://doi.org/10.1139/cjes-2019-0043	[0011]	117-7	117-7-3-C11-5	OROGEN	Canada	Mount Douglas Granite / New Brunswick / Acadian Orogen	Granite		Syenogranite		Igneous	LAICPMS										3620	134000		0.0521		0.0017	0.377		0.096				0.362					327		10	312		70
https://doi.org/10.1139/cjes-2019-0043	[0011]	117-7	117-7-2-C9-3	OROGEN	Canada	Mount Douglas Granite / New Brunswick / Acadian Orogen	Granite		Syenogranite		Igneous	LAICPMS										2281	72700		0.0569		0.0009	0.422		0.052				0.389					357		6	349		36
https://doi.org/10.1139/cjes-2019-0043	[0011]	117-7	117-7-2-C7-1	OROGEN	Canada	Mount Douglas Granite / New Brunswick / Acadian Orogen	Granite		Syenogranite		Igneous	LAICPMS										3430	42700		0.0582		0.001	0.433		0.016				0.431					365		6	365		11
https://doi.org/10.1139/cjes-2019-0043	[0011]	117-7	117-7-4-C9-6	OROGEN	Canada	Mount Douglas Granite / New Brunswick / Acadian Orogen	Granite		Syenogranite		Igneous	LAICPMS										1534	6834		0.0583		0.0009	0.436		0.049				0.577					365		6	353		37
https://doi.org/10.1139/cjes-2019-0043	[0011]	117-7	117-7-3-C11-6	OROGEN	Canada	Mount Douglas Granite / New Brunswick / Acadian Orogen	Granite		Syenogranite		Igneous	LAICPMS										3669	108000		0.0584		0.0007	0.402		0.025				0.394					366		4	341		17
https://doi.org/10.1139/cjes-2019-0043	[0011]	117-7	117-7-4-C4-1	OROGEN	Canada	Mount Douglas Granite / New Brunswick / Acadian Orogen	Granite		Syenogranite		Igneous	LAICPMS										2082	45800		0.0589		0.0008	0.433		0.011				0.07					369		5	365		8
https://doi.org/10.1139/cjes-2019-0043	[0011]	117-7	117-7-3-C4-1	OROGEN	Canada	Mount Douglas Granite / New Brunswick / Acadian Orogen	Granite		Syenogranite		Igneous	LAICPMS										2241	49900		0.059		0.0017	0.445		0.07				0.451					370		10	373		50
https://doi.org/10.1139/cjes-2019-0043	[0011]	117-7	117-7-3-C5-2	OROGEN	Canada	Mount Douglas Granite / New Brunswick / Acadian Orogen	Granite		Syenogranite		Igneous	LAICPMS										2418	97500		0.0591		0.001	0.414		0.042				0.541					370		6	352		29
https://doi.org/10.1139/cjes-2019-0043	[0011]	117-7	117-7-2-C9-1	OROGEN	Canada	Mount Douglas Granite / New Brunswick / Acadian Orogen	Granite		Syenogranite		Igneous	LAICPMS										2172	39660		0.0592		0.001	0.43		0.042				0.618					371		6	353		30
https://doi.org/10.1139/cjes-2019-0043	[0011]	117-7	117-7-4-C4-4	OROGEN	Canada	Mount Douglas Granite / New Brunswick / Acadian Orogen	Granite		Syenogranite		Igneous	LAICPMS										1945	80100		0.0593		0.0011	0.449		0.023				0.133					371		7	376		15
https://doi.org/10.1139/cjes-2019-0043	[0011]	117-7	117-7-3-C11-1	OROGEN	Canada	Mount Douglas Granite / New Brunswick / Acadian Orogen	Granite		Syenogranite		Igneous	LAICPMS										3237	119600		0.0594		0.0009	0.443		0.033				0.425					372		6	372		23
https://doi.org/10.1139/cjes-2019-0043	[0011]	117-7	117-7-2-C9-4	OROGEN	Canada	Mount Douglas Granite / New Brunswick / Acadian Orogen	Granite		Syenogranite		Igneous	LAICPMS										1374	32150		0.0594		0.0013	0.445		0.081				0.422					372		8	370		54
https://doi.org/10.1139/cjes-2019-0043	[0011]	117-7	117-7-3-C5-1	OROGEN	Canada	Mount Douglas Granite / New Brunswick / Acadian Orogen	Granite		Syenogranite		Igneous	LAICPMS										3122	110900		0.0594		0.0009	0.419		0.031				0.601					372		5	350		23
https://doi.org/10.1139/cjes-2019-0043	[0011]	117-7	117-7-3-C11-2	OROGEN	Canada	Mount Douglas Granite / New Brunswick / Acadian Orogen	Granite		Syenogranite		Igneous	LAICPMS										4020	136100		0.0595		0.001	0.422		0.039				0.528					373		6	353		30
https://doi.org/10.1139/cjes-2019-0043	[0011]	117-7	117-7-4-C11-2	OROGEN	Canada	Mount Douglas Granite / New Brunswick / Acadian Orogen	Granite		Syenogranite		Igneous	LAICPMS										2662	100000		0.0596		0.0009	0.449		0.036				0.363					373		6	376		22
https://doi.org/10.1139/cjes-2019-0043	[0011]	117-7	117-7-3-C10-3	OROGEN	Canada	Mount Douglas Granite / New Brunswick / Acadian Orogen	Granite		Syenogranite		Igneous	LAICPMS										4320	139500		0.0596		0.0008	0.449		0.034				0.224					373		5	371		25
https://doi.org/10.1139/cjes-2019-0043	[0011]	117-7	117-7-2-C7-2	OROGEN	Canada	Mount Douglas Granite / New Brunswick / Acadian Orogen	Granite		Syenogranite		Igneous	LAICPMS										1901	91900		0.0599		0.0008	0.427		0.011				0.019					375		5	361		8
https://doi.org/10.1139/cjes-2019-0043	[0011]	117-7	117-7-2-C9-2	OROGEN	Canada	Mount Douglas Granite / New Brunswick / Acadian Orogen	Granite		Syenogranite		Igneous	LAICPMS										2129	61300		0.06		0.0009	0.443		0.043				0.433					376		5	368		31
https://doi.org/10.1139/cjes-2019-0043	[0011]	117-7	117-7-2-C6-3	OROGEN	Canada	Mount Douglas Granite / New Brunswick / Acadian Orogen	Granite		Syenogranite		Igneous	LAICPMS										2812	100700		0.0603		0.0008	0.446		0.01				0.169					378		5	374		7
https://doi.org/10.1139/cjes-2019-0043	[0011]	117-7	117-7-2-C6-1	OROGEN	Canada	Mount Douglas Granite / New Brunswick / Acadian Orogen	Granite		Syenogranite		Igneous	LAICPMS										2251	82700		0.0606		0.0008	0.454		0.01				0.032					379		5	380		7
https://doi.org/10.1139/cjes-2019-0043	[0011]	117-7	117-7-2-C11-1	OROGEN	Canada	Mount Douglas Granite / New Brunswick / Acadian Orogen	Granite		Syenogranite		Igneous	LAICPMS										3268	104800		0.0624		0.0007	0.465		0.032				0.456					390		4	384		23
https://doi.org/10.1139/cjes-2019-0043	[0011]	117-7	117-7-2-C11-2	OROGEN	Canada	Mount Douglas Granite / New Brunswick / Acadian Orogen	Granite		Syenogranite		Igneous	LAICPMS										4340	102300		0.0627		0.001	0.473		0.033				0.504					392		6	391		22
https://doi.org/10.1139/cjes-2019-0043	[0011]	117-7	117-7-3-C4-4	OROGEN	Canada	Mount Douglas Granite / New Brunswick / Acadian Orogen	Granite		Syenogranite		Igneous	LAICPMS										2867	88000		0.0628		0.0011	0.473		0.066				0.63					392		7	365		51
https://doi.org/10.1139/cjes-2019-0043	[0011]	117-7	117-7-3-C2-1	OROGEN	Canada	Mount Douglas Granite / New Brunswick / Acadian Orogen	Granite		Syenogranite		Igneous	LAICPMS										1210	19180		0.0602		0.0025	0.44		0.19				0.2					377		15	350		140
https://doi.org/10.1139/cjes-2019-0043	[0011]	117-7	117-7-2-C8-1	OROGEN	Canada	Mount Douglas Granite / New Brunswick / Acadian Orogen	Granite		Syenogranite		Igneous	LAICPMS										1791	75200		0.0598		0.001	0.404		0.046				0.535					374		6	339		34
https://doi.org/10.1139/cjes-2019-0043	[0011]	139-5	139-5 A-4-C17-5	OROGEN	Canada	Mount Douglas Granite / New Brunswick / Acadian Orogen	Granite		Syenogranite / Monzogranite		Igneous	LAICPMS										1751	33700		0.059		0.002	0.487		0.17				0.295					371		12	401		75
https://doi.org/10.1139/cjes-2019-0043	[0011]	139-5	139-5 A-4-C4-3	OROGEN	Canada	Mount Douglas Granite / New Brunswick / Acadian Orogen	Granite		Syenogranite / Monzogranite		Igneous	LAICPMS										2205	77900		0.06		0.003	0.482		0.34				0.148					373		18	400		120
https://doi.org/10.1139/cjes-2019-0043	[0011]	139-5	139-5 A-4-C4-4	OROGEN	Canada	Mount Douglas Granite / New Brunswick / Acadian Orogen	Granite		Syenogranite / Monzogranite		Igneous	LAICPMS										1321	25000		0.059		0.006	0.466		1				0.07					369		35	390		200
https://doi.org/10.1139/cjes-2019-0043	[0011]	139-5	139-5 A-4-C5-5	OROGEN	Canada	Mount Douglas Granite / New Brunswick / Acadian Orogen	Granite		Syenogranite / Monzogranite		Igneous	LAICPMS										1950	75300		0.061		0.002	0.483		0.097				0.041					379		10	399		52
https://doi.org/10.1139/cjes-2019-0043	[0011]	139-5	139-5 A-3-C9-3	OROGEN	Canada	Mount Douglas Granite / New Brunswick / Acadian Orogen	Granite		Syenogranite / Monzogranite		Igneous	LAICPMS										2137	46100		0.059		0.001	0.464		0.037				0.03					368		7	385		24
https://doi.org/10.1139/cjes-2019-0043	[0011]	139-5	139-5 A-3-C10-2	OROGEN	Canada	Mount Douglas Granite / New Brunswick / Acadian Orogen	Granite		Syenogranite / Monzogranite		Igneous	LAICPMS										1851	37550		0.06		0.001	0.457		0.024				0.048					374		7	380		17
https://doi.org/10.1139/cjes-2019-0043	[0011]	139-5	139-5 A-3-C9-1	OROGEN	Canada	Mount Douglas Granite / New Brunswick / Acadian Orogen	Granite		Syenogranite / Monzogranite		Igneous	LAICPMS										1641	28370		0.059		0.001	0.448		0.027				0					370		8	376		18
https://doi.org/10.1139/cjes-2019-0043	[0011]	139-5	139-5 A-4-C7-3	OROGEN	Canada	Mount Douglas Granite / New Brunswick / Acadian Orogen	Granite		Syenogranite / Monzogranite		Igneous	LAICPMS										2680	99300		0.059		0.004	0.445		0.37				0.06					367		26	372		120
https://doi.org/10.1139/cjes-2019-0043	[0011]	139-5	139-5 A-3-C14-1	OROGEN	Canada	Mount Douglas Granite / New Brunswick / Acadian Orogen	Granite		Syenogranite / Monzogranite		Igneous	LAICPMS										653	48680		0.059		0.002	0.442		0.04				0.067					370		9	375		28
https://doi.org/10.1139/cjes-2019-0043	[0011]	139-5	139-5 A-3-C9-4	OROGEN	Canada	Mount Douglas Granite / New Brunswick / Acadian Orogen	Granite		Syenogranite / Monzogranite		Igneous	LAICPMS										1770	31900		0.058		0.001	0.428		0.023				0.244					361		8	366		16
https://doi.org/10.1139/cjes-2019-0043	[0011]	139-5	139-5 A-4-C17-6	OROGEN	Canada	Mount Douglas Granite / New Brunswick / Acadian Orogen	Granite		Syenogranite / Monzogranite		Igneous	LAICPMS										1640	45360		0.06		0.001	0.448		0.049				0.115					378		8	382		31
https://doi.org/10.1139/cjes-2019-0043	[0011]	139-5	39-5 A-3-C11-5	OROGEN	Canada	Mount Douglas Granite / New Brunswick / Acadian Orogen	Granite		Syenogranite / Monzogranite		Igneous	LAICPMS										2229	51990		0.059		0.001	0.447		0.023				0.191					372		7	376		16
https://doi.org/10.1139/cjes-2019-0043	[0011]	139-5	139-5 A-4-C9-1	OROGEN	Canada	Mount Douglas Granite / New Brunswick / Acadian Orogen	Granite		Syenogranite / Monzogranite		Igneous	LAICPMS										3990	92200		0.059		0.001	0.443		0.057				0.176					368		7	371		33
https://doi.org/10.1139/cjes-2019-0043	[0011]	139-5	139-5 A-3-C11-2	OROGEN	Canada	Mount Douglas Granite / New Brunswick / Acadian Orogen	Granite		Syenogranite / Monzogranite		Igneous	LAICPMS										4486	89100		0.059		0.001	0.44		0.019				0.117					371		6	374		13
https://doi.org/10.1139/cjes-2019-0043	[0011]	139-5	139-5 A-3-C10-5	OROGEN	Canada	Mount Douglas Granite / New Brunswick / Acadian Orogen	Granite		Syenogranite / Monzogranite		Igneous	LAICPMS										2924	42680		0.059		0.001	0.444		0.022				0.042					370		6	372		15
https://doi.org/10.1139/cjes-2019-0043	[0011]	139-5	139-5 A-3-C10-9	OROGEN	Canada	Mount Douglas Granite / New Brunswick / Acadian Orogen	Granite		Syenogranite / Monzogranite		Igneous	LAICPMS										1224	19050		0.059		0.002	0.444		0.15				0.14					370		12	372		68
https://doi.org/10.1139/cjes-2019-0043	[0011]	139-5	139-5 A-4-C16-6	OROGEN	Canada	Mount Douglas Granite / New Brunswick / Acadian Orogen	Granite		Syenogranite / Monzogranite		Igneous	LAICPMS										1641	31590		0.059		0.001	0.436		0.031				0.086					368		7	369		21
https://doi.org/10.1139/cjes-2019-0043	[0011]	139-5	139-5 A-3-C10-4	OROGEN	Canada	Mount Douglas Granite / New Brunswick / Acadian Orogen	Granite		Syenogranite / Monzogranite		Igneous	LAICPMS										3607	96900		0.059		0.001	0.443		0.02				0.142					371		6	371		14
https://doi.org/10.1139/cjes-2019-0043	[0011]	139-5	139-5 A-3-C11-10	OROGEN	Canada	Mount Douglas Granite / New Brunswick / Acadian Orogen	Granite		Syenogranite / Monzogranite		Igneous	LAICPMS										1652	41300		0.059		0.001	0.444		0.029				0.038					370		8	370		20
https://doi.org/10.1139/cjes-2019-0043	[0011]	139-5	139-5 A-3-C14-3	OROGEN	Canada	Mount Douglas Granite / New Brunswick / Acadian Orogen	Granite		Syenogranite / Monzogranite		Igneous	LAICPMS										1560	61900		0.059		0.001	0.439		0.025				0.103					370		8	370		18
https://doi.org/10.1139/cjes-2019-0043	[0011]	139-5	139-5 A-3-C11-6	OROGEN	Canada	Mount Douglas Granite / New Brunswick / Acadian Orogen	Granite		Syenogranite / Monzogranite		Igneous	LAICPMS										1330	25150		0.059		0.001	0.441		0.026				0.009					370		8	370		18
https://doi.org/10.1139/cjes-2019-0043	[0011]	139-5	139-5 A-3-C9-7	OROGEN	Canada	Mount Douglas Granite / New Brunswick / Acadian Orogen	Granite		Syenogranite / Monzogranite		Igneous	LAICPMS										1978	62100		0.059		0.001	0.439		0.07				0.121					368		7	367		41
https://doi.org/10.1139/cjes-2019-0043	[0011]	139-5	139-5 A-4-C16-2	OROGEN	Canada	Mount Douglas Granite / New Brunswick / Acadian Orogen	Granite		Syenogranite / Monzogranite		Igneous	LAICPMS										2463	76400		0.062		0.001	0.465		0.026				0.096					388		7	386		17
https://doi.org/10.1139/cjes-2019-0043	[0011]	139-5	139-5 A-3-C14-2	OROGEN	Canada	Mount Douglas Granite / New Brunswick / Acadian Orogen	Granite		Syenogranite / Monzogranite		Igneous	LAICPMS										1715	69200		0.061		0.001	0.452		0.024				0.113					380		8	378		17
https://doi.org/10.1139/cjes-2019-0043	[0011]	139-5	139-5 A-3-C9-2	OROGEN	Canada	Mount Douglas Granite / New Brunswick / Acadian Orogen	Granite		Syenogranite / Monzogranite		Igneous	LAICPMS										2275	43310		0.059		0.005	0.43		0.56				0.163					368		30	366		160
https://doi.org/10.1139/cjes-2019-0043	[0011]	139-5	139-5 A-4-C15-1	OROGEN	Canada	Mount Douglas Granite / New Brunswick / Acadian Orogen	Granite		Syenogranite / Monzogranite		Igneous	LAICPMS										2646	87500		0.058		0.001	0.429		0.046				0.123					363		7	360		27
https://doi.org/10.1139/cjes-2019-0043	[0011]	139-5	139-5 A-4-C16-3	OROGEN	Canada	Mount Douglas Granite / New Brunswick / Acadian Orogen	Granite		Syenogranite / Monzogranite		Igneous	LAICPMS										1720	34410		0.059		0.001	0.435		0.025				0.017					371		7	368		17
https://doi.org/10.1139/cjes-2019-0043	[0011]	139-5	139-5 A-3-C14-4	OROGEN	Canada	Mount Douglas Granite / New Brunswick / Acadian Orogen	Granite		Syenogranite / Monzogranite		Igneous	LAICPMS										1706	64600		0.06		0.001	0.442		0.024				0.108					374		8	371		17
https://doi.org/10.1139/cjes-2019-0043	[0011]	139-5	139-5 A-3-C10-8	OROGEN	Canada	Mount Douglas Granite / New Brunswick / Acadian Orogen	Granite		Syenogranite / Monzogranite		Igneous	LAICPMS										1940	31470		0.059		0.003	0.431		0.2				0.019					367		15	363		64
https://doi.org/10.1139/cjes-2019-0043	[0011]	139-5	139-5 A-3-C11-1	OROGEN	Canada	Mount Douglas Granite / New Brunswick / Acadian Orogen	Granite		Syenogranite / Monzogranite		Igneous	LAICPMS										947	44440		0.062		0.002	0.459		0.03				0.105					385		9	381		21
https://doi.org/10.1139/cjes-2019-0043	[0011]	139-5	139-5 A-3-C10-1	OROGEN	Canada	Mount Douglas Granite / New Brunswick / Acadian Orogen	Granite		Syenogranite / Monzogranite		Igneous	LAICPMS										1460	48660		0.057		0.001	0.42		0.027				0.011					360		7	355		19
https://doi.org/10.1139/cjes-2019-0043	[0011]	139-5	139-5 A-4-C17-4	OROGEN	Canada	Mount Douglas Granite / New Brunswick / Acadian Orogen	Granite		Syenogranite / Monzogranite		Igneous	LAICPMS										1960	64400		0.059		0.001	0.436		0.024				0.136					370		6	365		17
https://doi.org/10.1139/cjes-2019-0043	[0011]	139-5	139-5 A-4-C17-8	OROGEN	Canada	Mount Douglas Granite / New Brunswick / Acadian Orogen	Granite		Syenogranite / Monzogranite		Igneous	LAICPMS										2131	40190		0.058		0.001	0.422		0.025				0.018					364		7	357		18
https://doi.org/10.1139/cjes-2019-0043	[0011]	139-5	139-5 A-3-C5-1	OROGEN	Canada	Mount Douglas Granite / New Brunswick / Acadian Orogen	Granite		Syenogranite / Monzogranite		Igneous	LAICPMS										1701	38700		0.059		0.001	0.431		0.024				0.044					369		8	362		17
https://doi.org/10.1139/cjes-2019-0043	[0011]	139-5	139-5 A-3-C10-3	OROGEN	Canada	Mount Douglas Granite / New Brunswick / Acadian Orogen	Granite		Syenogranite / Monzogranite		Igneous	LAICPMS										4488	96900		0.059		0.001	0.426		0.018				0.26					371		6	359		13
https://doi.org/10.1139/cjes-2019-0043	[0011]	139-5	139-5 A-4-C17-15	OROGEN	Canada	Mount Douglas Granite / New Brunswick / Acadian Orogen	Granite		Syenogranite / Monzogranite		Igneous	LAICPMS										1525	22160		0.06		0.001	0.42		0.028				0.009					376		8	356		20
https://doi.org/10.1139/cjes-2019-0043	[0011]	139-5	139-5 A-3-C11-9	OROGEN	Canada	Mount Douglas Granite / New Brunswick / Acadian Orogen	Granite		Syenogranite / Monzogranite		Igneous	LAICPMS										1158	21700		0.066		0.003	0.64		0.34				0.779					413		18	450		200
https://doi.org/10.1139/cjes-2019-0043	[0011]	139-5	139-5 A-4-C7-2	OROGEN	Canada	Mount Douglas Granite / New Brunswick / Acadian Orogen	Granite		Syenogranite / Monzogranite		Igneous	LAICPMS										2539	100500		0.063		0.002	0.53		0.17				0.715					393		11	410		110
https://doi.org/10.1139/cjes-2019-0043	[0011]	139-5	139-5 A-4-C7-7	OROGEN	Canada	Mount Douglas Granite / New Brunswick / Acadian Orogen	Granite		Syenogranite / Monzogranite		Igneous	LAICPMS										3180	119200		0.058		0.022	0.56		1.3				0.787					363		120	350		250
https://doi.org/10.1139/cjes-2019-0043	[0011]	139-5	139-5 A-3-C13-1	OROGEN	Canada	Mount Douglas Granite / New Brunswick / Acadian Orogen	Granite		Syenogranite / Monzogranite		Igneous	LAICPMS										2730	115100		0.062		0.005	0.28		0.35				0.749					388		28	370		150
https://doi.org/10.1139/cjes-2019-0043	[0011]	115-5	115-5-C14-3	OROGEN	Canada	Mount Douglas Granite / New Brunswick / Acadian Orogen	Granite		Syenogranite / Monzogranite		Igneous	LAICPMS										1046	39600		0.059		0.002	0.436		0.031				0.13					368		9	364		21
https://doi.org/10.1139/cjes-2019-0043	[0011]	115-5	115-5-C7-4	OROGEN	Canada	Mount Douglas Granite / New Brunswick / Acadian Orogen	Granite		Syenogranite / Monzogranite		Igneous	LAICPMS										3813	3846		0.06		0.001	0.437		0.012				0.252					374		5	368		9
https://doi.org/10.1139/cjes-2019-0043	[0011]	115-5	115-5-C9-1	OROGEN	Canada	Mount Douglas Granite / New Brunswick / Acadian Orogen	Granite		Syenogranite / Monzogranite		Igneous	LAICPMS										2592	58700		0.059		0.002	0.442		0.11				0.372					371		9	373		41
https://doi.org/10.1130/B35380.1	[0012]	15LJ-51	1702D.1-1	OROGEN	South China	Ewenling Formation / Baoban Complex	Metapelite	Amphibolite	Micaschist		Metamorphic	SHRIMP										37374.5	4553.36		0.0710402	0.00160178		0.543256	0.0138226		0.0554624	0.000643468			0.0200385	0.000619594			442.419	9.75731					430.913	25.8552
https://doi.org/10.1130/B35380.1	[0012]	15LJ-51	1702H.1-3	OROGEN	South China	Ewenling Formation / Baoban Complex	Metapelite	Amphibolite	Micaschist		Metamorphic	SHRIMP										35013.6	4701.29		0.0705208	0.0014026		0.54441	0.0120968		0.0559896	0.000537706			0.0215498	0.000461891			439.293	8.57947					451.958	21.3241
https://doi.org/10.1130/B35380.1	[0012]	15LJ-51	1702H.2-2	OROGEN	South China	Ewenling Formation / Baoban Complex	Metapelite	Amphibolite	Micaschist		Metamorphic	SHRIMP										41024.8	6774.7		0.0666275	0.00130255		0.514752	0.0109813		0.0560329	0.000458594			0.0210322	0.000463335			415.805	8.00096					453.673	18.1673
https://doi.org/10.1130/B35380.1	[0012]	15LJ-51	1702B.1-1	OROGEN	South China	Ewenling Formation / Baoban Complex	Metapelite	Amphibolite	Micaschist		Metamorphic	SHRIMP										23839	4903.48		0.067671	0.00151786		0.524477	0.01403		0.0562112	0.000806774			0.0227352	0.000430356			422.109	9.27649					460.719	31.8203
https://doi.org/10.1130/B35380.1	[0012]	15LJ-51	1701J.1-1	OROGEN	South China	Ewenling Formation / Baoban Complex	Metapelite	Amphibolite	Micaschist		Metamorphic	SHRIMP										24428.7	3987.1		0.0736628	0.00116482		0.571246	0.0106954		0.0562437	0.000546822			0.0243092	0.000450012			458.185	7.17152					462	21.5502
https://doi.org/10.1130/B35380.1	[0012]	15LJ-51	1606C.1-2	OROGEN	South China	Ewenling Formation / Baoban Complex	Metapelite	Amphibolite	Micaschist		Metamorphic	SHRIMP										25255.3	5305.51		0.0741516	0.00451561		0.576023	0.0366463		0.0563402	0.000971133			0.0226693	0.000988657			461.119	27.1619					465.8	38.1816
https://doi.org/10.1130/B35380.1	[0012]	15LJ-51	1702H.2-4	OROGEN	South China	Ewenling Formation / Baoban Complex	Metapelite	Amphibolite	Micaschist		Metamorphic	SHRIMP										48746.1	8148.09		0.0713865	0.00121245		0.554784	0.0101961		0.0563646	0.000372017			0.0215795	0.000540272			444.503	7.45519					466.761	14.6177
https://doi.org/10.1130/B35380.1	[0012]	15LJ-51	1701H.1-1	OROGEN	South China	Ewenling Formation / Baoban Complex	Metapelite	Amphibolite	Micaschist		Metamorphic	SHRIMP										28060.5	4158.25		0.0711645	0.00131248		0.553246	0.0119201		0.0563837	0.000613666			0.0234464	0.000476599			443.167	8.04477					467.509	24.1015
https://doi.org/10.1130/B35380.1	[0012]	15LJ-51	1606C.1-1	OROGEN	South China	Ewenling Formation / Baoban Complex	Metapelite	Amphibolite	Micaschist		Metamorphic	SHRIMP										25131.5	4234.24		0.0739175	0.00126924		0.57585	0.0119376		0.0565016	0.000569816			0.0205472	0.000584136			459.714	8.02321					472.134	22.3148
https://doi.org/10.1130/B35380.1	[0012]	15LJ-51	1701F.1-1	OROGEN	South China	Ewenling Formation / Baoban Complex	Metapelite	Amphibolite	Micaschist		Metamorphic	SHRIMP										29656.4	5573.39		0.0730524	0.00102826		0.569402	0.0094184		0.0565305	0.000471668			0.024979	0.000454833			454.519	6.37601					473.266	18.4581
https://doi.org/10.1130/B35380.1	[0012]	15LJ-51	1701J.1-2	OROGEN	South China	Ewenling Formation / Baoban Complex	Metapelite	Amphibolite	Micaschist		Metamorphic	SHRIMP										45014.2	6693.42		0.0697754	0.00134652		0.544313	0.011498		0.0565778	0.00046747			0.0220634	0.000477437			434.802	8.25055					475.113	18.2727
https://doi.org/10.1130/B35380.1	[0012]	15LJ-51	1606F.1-1	OROGEN	South China	Ewenling Formation / Baoban Complex	Metapelite	Amphibolite	Micaschist		Metamorphic	SHRIMP										27982.2	5508.12		0.0735982	0.00114307		0.574606	0.0104918		0.0566241	0.00043706			0.0234735	0.00066974			457.797	7.30737					476.925	17.0647
https://doi.org/10.1130/B35380.1	[0012]	15LJ-51	1702F.1-1	OROGEN	South China	Ewenling Formation / Baoban Complex	Metapelite	Amphibolite	Micaschist		Metamorphic	SHRIMP										51693.1	7459.52		0.0741078	0.00117862		0.578659	0.0100863		0.0566314	0.000380996			0.0232215	0.000484323			460.856	7.25145					477.21	14.8731
https://doi.org/10.1130/B35380.1	[0012]	15LJ-51	1702H.2-3	OROGEN	South China	Ewenling Formation / Baoban Complex	Metapelite	Amphibolite	Micaschist		Metamorphic	SHRIMP										61957.2	7532.56		0.0707878	0.00108377		0.553016	0.00951392		0.0566602	0.000423275			0.0203825	0.000395284			440.9	6.70139					478.331	16.512
https://doi.org/10.1130/B35380.1	[0012]	15LJ-51	1606A.1-1	OROGEN	South China	Ewenling Formation / Baoban Complex	Metapelite	Amphibolite	Micaschist		Metamorphic	SHRIMP										44112.3	8187.55		0.0747039	0.00126508		0.583909	0.011338		0.0566893	0.000429296			0.0245262	0.000704041			464.433	8.00249					479.465	16.735
https://doi.org/10.1130/B35380.1	[0012]	15LJ-51	1702H.1-1	OROGEN	South China	Ewenling Formation / Baoban Complex	Metapelite	Amphibolite	Micaschist		Metamorphic	SHRIMP										31805.7	4127.33		0.0716266	0.00122343		0.562223	0.0106198		0.0569289	0.000437781			0.023384	0.000426088			445.948	7.5192					488.781	16.9667
https://doi.org/10.1130/B35380.1	[0012]	15LJ-51	1702H.2-1	OROGEN	South China	Ewenling Formation / Baoban Complex	Metapelite	Amphibolite	Micaschist		Metamorphic	SHRIMP										38355.6	6136.34		0.072244	0.00118404		0.567076	0.0101245		0.0569296	0.000379705			0.0226037	0.00045901			449.661	7.28658					488.807	14.7157
https://doi.org/10.1130/B35380.1	[0012]	15LJ-51	1701A.1-1	OROGEN	South China	Ewenling Formation / Baoban Complex	Metapelite	Amphibolite	Micaschist		Metamorphic	SHRIMP										29058.8	6312.2		0.0776488	0.00113116		0.612939	0.010083		0.0572507	0.000414823			0.0261243	0.000480538			482.073	6.97026					501.205	15.9525
https://doi.org/10.1130/B35380.1	[0012]	15LJ-51	1701F.1-2	OROGEN	South China	Ewenling Formation / Baoban Complex	Metapelite	Amphibolite	Micaschist		Metamorphic	SHRIMP										35292.1	6290.48		0.0731306	0.00120666		0.577564	0.0106547		0.0572795	0.000452238			0.0232086	0.000488535			454.989	7.41743					502.312	17.3793
https://doi.org/10.1130/B35380.1	[0012]	15LJ-51	1701D.1-1	OROGEN	South China	Ewenling Formation / Baoban Complex	Metapelite	Amphibolite	Micaschist		Metamorphic	SHRIMP										31350.6	6218.09		0.155284	0.0024298		1.50861	0.0250953		0.0704608	0.000362312			0.0492075	0.0009576			930.516	13.9299					941.81	10.5364
https://doi.org/10.1130/B35380.1	[0012]	15LJ-51	1606F.1-2	OROGEN	South China	Ewenling Formation / Baoban Complex	Metapelite	Amphibolite	Micaschist		Metamorphic	SHRIMP										32950.8	6268.02		0.159575	0.00251889		1.55322	0.037134		0.0705938	0.00119865			0.0479678	0.00136987			954.416	14.9406					945.674	34.7713
https://doi.org/10.1130/B35380.1	[0012]	15LJ-51	1606G.2-3	OROGEN	South China	Ewenling Formation / Baoban Complex	Metapelite	Amphibolite	Micaschist		Metamorphic	SHRIMP										37468.6	6100.45		0.15417	0.00430985		1.50163	0.0541046		0.0706418	0.00154729			0.0433309	0.00197926			924.295	24.559					947.067	44.8449
https://doi.org/10.1130/B35380.1	[0012]	15LJ-51	1606F.1-4	OROGEN	South China	Ewenling Formation / Baoban Complex	Metapelite	Amphibolite	Micaschist		Metamorphic	SHRIMP										42431.7	6953.47		0.153269	0.00281007		1.52014	0.0302265		0.0719331	0.000369528			0.0406023	0.00119326			919.262	16.4829					984.047	10.4581
https://doi.org/10.1130/B35380.1	[0012]	15LJ-51	1702G.2-2	OROGEN	South China	Ewenling Formation / Baoban Complex	Metapelite	Amphibolite	Micaschist		Metamorphic	SHRIMP										29756.2	5691.72		0.166748	0.00261198		1.66272	0.0274813		0.0723194	0.000342329			0.0478063	0.00113252			994.171	14.8294					994.944	9.62052
https://doi.org/10.1130/B35380.1	[0012]	15LJ-51	1702J.1-1	OROGEN	South China	Ewenling Formation / Baoban Complex	Metapelite	Amphibolite	Micaschist		Metamorphic	SHRIMP										26898.5	4940.44		0.161302	0.00265047		1.62509	0.0281969		0.0730695	0.00036996			0.0504407	0.0009219			964.009	15.0784					1015.88	10.2576
https://doi.org/10.1130/B35380.1	[0012]	15LJ-51	1606G.2-4	OROGEN	South China	Ewenling Formation / Baoban Complex	Metapelite	Amphibolite	Micaschist		Metamorphic	SHRIMP										40722.3	6557.51		0.167041	0.00347203		1.70953	0.0381476		0.0742256	0.00042526			0.0469796	0.00140442			995.785	19.9179					1047.61	11.5516
https://doi.org/10.1130/B35380.1	[0012]	15LJ-51	1702G.1-1	OROGEN	South China	Ewenling Formation / Baoban Complex	Metapelite	Amphibolite	Micaschist		Metamorphic	SHRIMP										28402.2	6315.36		0.176629	0.00288347		1.80833	0.0308729		0.0742531	0.000328642			0.0544657	0.00100263			1048.53	16.1995					1048.35	8.92281
https://doi.org/10.1130/B35380.1	[0012]	15LJ-51	1702G.2-1	OROGEN	South China	Ewenling Formation / Baoban Complex	Metapelite	Amphibolite	Micaschist		Metamorphic	SHRIMP										27644.8	5942.51		0.183229	0.00385811		1.90765	0.0425317		0.0755097	0.000526828			0.0565365	0.00118152			1084.59	21.326					1082.1	13.9947
https://doi.org/10.1130/B35380.1	[0012]	15LJ-51	1701C.1-1	OROGEN	South China	Ewenling Formation / Baoban Complex	Metapelite	Amphibolite	Micaschist		Metamorphic	SHRIMP										33386.4	5001.07		0.18643	0.00330046		1.97923	0.0379565		0.0769981	0.00053934			0.0589486	0.0013565			1102	18.3187					1121.14	13.9688
https://doi.org/10.1130/B35380.1	[0012]	15LJ-51	1606G.1-2	OROGEN	South China	Ewenling Formation / Baoban Complex	Metapelite	Amphibolite	Micaschist		Metamorphic	SHRIMP										34791.9	6363.93		0.181734	0.0039084		1.94903	0.0497695		0.0777821	0.000970149			0.0566566	0.00218091			1076.44	22.0933					1141.31	24.7996
https://doi.org/10.1130/B35380.1	[0012]	15LJ-51	1606G.1-1	OROGEN	South China	Ewenling Formation / Baoban Complex	Metapelite	Amphibolite	Micaschist		Metamorphic	SHRIMP										31876.8	5665.68		0.197998	0.00339241		2.13895	0.0413679		0.0783502	0.000541027			0.0605974	0.00178502			1164.55	19.3213					1155.77	13.7007
https://doi.org/10.1130/B35380.1	[0012]	15LJ-51	1701G.1-1	OROGEN	South China	Ewenling Formation / Baoban Complex	Metapelite	Amphibolite	Micaschist		Metamorphic	SHRIMP										28231.9	5433.88		0.193428	0.00266137		2.09714	0.0311566		0.0786333	0.000399647			0.0596613	0.00110654			1139.92	14.9036					1162.92	10.0735
https://doi.org/10.1130/B35380.1	[0012]	15LJ-51	1606F.2-3	OROGEN	South China	Ewenling Formation / Baoban Complex	Metapelite	Amphibolite	Micaschist		Metamorphic	SHRIMP										30454.2	5184.38		0.196937	0.00324809		2.18163	0.0391911		0.0803437	0.000341913			0.0569941	0.00164165			1158.84	18.5961					1205.44	8.38275
https://doi.org/10.1130/B35380.1	[0012]	15LJ-51	1606F.2-1	OROGEN	South China	Ewenling Formation / Baoban Complex	Metapelite	Amphibolite	Micaschist		Metamorphic	SHRIMP										30443	4915.34		0.217077	0.00368565		2.5061	0.0460762		0.0837306	0.000348188			0.0579097	0.00201088			1266.41	20.6992					1286.3	8.09703
https://doi.org/10.1130/B35380.1	[0012]	15LJ-51	1702E.1-1	OROGEN	South China	Ewenling Formation / Baoban Complex	Metapelite	Amphibolite	Micaschist		Metamorphic	SHRIMP										49946	2925.32		0.205162	0.00360125		2.37631	0.0450433		0.0840049	0.000567342			0.0603414	0.00113211			1202.99	19.6898					1292.67	13.1385
https://doi.org/10.1130/B35380.1	[0012]	15LJ-51	1701F.2-1	OROGEN	South China	Ewenling Formation / Baoban Complex	Metapelite	Amphibolite	Micaschist		Metamorphic	SHRIMP										37680.8	5334.68		0.220044	0.00319123		2.55885	0.039629		0.0843402	0.000412821			0.0666488	0.00140361			1282.11	17.4273					1300.41	9.5117
https://doi.org/10.1130/B35404.1	[0013]	13GB10	YZ-14-1	OROGEN	NW China	Beishan Orogen / Central Asian Orogenic Belt	Metagreywacke	Amphibolite	Metagreywacke		Xenocryst	LAICPMS										60935.4	779.747		0.142742	0.00229342		1.39971	0.0568118		0.0718498	0.00281111			0.0443427	0.000645364			860.1	12.9		888.8	24		980.8	79.7
https://doi.org/10.1130/B35404.1	[0013]	13GB10	YZ-14-2	OROGEN	NW China	Beishan Orogen / Central Asian Orogenic Belt	Metagreywacke	Amphibolite	Metagreywacke		Xenocryst	LAICPMS										56130.4	463.18		0.149763	0.00282267		1.4653	0.0758571		0.0716271	0.00369811			0.0461343	0.000723623			899.6	15.8		916.2	31.2		975	105
https://doi.org/10.1130/B35404.1	[0013]	13GB10	XZ-35-1	OROGEN	NW China	Beishan Orogen / Central Asian Orogenic Belt	Metagreywacke	Amphibolite	Metagreywacke		Xenocryst	LAICPMS										50632.9	1665.17		0.140152	0.00225996		1.30387	0.0492011		0.0683673	0.00266732			0.0456881	0.00101758			845.5	12.8		847.4	21.7		878.9	80.8
https://doi.org/10.1130/B35404.1	[0013]	13GB10	XZ-35-3	OROGEN	NW China	Beishan Orogen / Central Asian Orogenic Belt	Metagreywacke	Amphibolite	Metagreywacke		Xenocryst	LAICPMS										67940.5	1785.61		0.155282	0.00274126		1.4897	0.0522148		0.0698414	0.00223804			0.0432308	0.000744528			930.5	15.3		926.2	21.3		922.7	65.9
https://doi.org/10.1130/B35404.1	[0013]	13GB10	XZ-35-4	OROGEN	NW China	Beishan Orogen / Central Asian Orogenic Belt	Metagreywacke	Amphibolite	Metagreywacke		Xenocryst	LAICPMS										52295.4	1441.1		0.142804	0.00204069		1.34511	0.0513357		0.0691542	0.00277784			0.0442721	0.00084236			860.5	11.5		865.4	22.2		902.3	82.9
https://doi.org/10.1130/B35404.1	[0013]	13GB01	YZ-24-1	OROGEN	NW China	Beishan Orogen / Central Asian Orogenic Belt	Metagreywacke	Amphibolite	Metagreywacke		Xenocryst	LAICPMS										70558.7	2374.8		0.191646	0.00326173		2.11966	0.0729894		0.0804509	0.00255898			0.0582252	0.00114147			1130.3	17.6		1155.2	23.8		1207.2	62.7
https://doi.org/10.1130/B35404.1	[0013]	13GB01	YZ-24-2	OROGEN	NW China	Beishan Orogen / Central Asian Orogenic Belt	Metagreywacke	Amphibolite	Metagreywacke		Xenocryst	LAICPMS										114378	2739.17		0.133322	0.00196927		1.2939	0.0470018		0.0709324	0.00251252			0.0343076	0.000543096			806.8	11.2		843	20.8		954.5	72.4
https://doi.org/10.1130/B35404.1	[0013]	13GB01	YZ-24-4	OROGEN	NW China	Beishan Orogen / Central Asian Orogenic Belt	Metagreywacke	Amphibolite	Metagreywacke		Xenocryst	LAICPMS										70462.5	4255.54		0.202722	0.00358591		2.1652	0.0714498		0.077699	0.00237562			0.0583205	0.000922333			1189.9	19.2		1169.9	22.9		1138.3	60.9
https://doi.org/10.1130/B35404.1	[0013]	13GB01	YZ-27-1	OROGEN	NW China	Beishan Orogen / Central Asian Orogenic Belt	Metagreywacke	Amphibolite	Metagreywacke		Xenocryst	LAICPMS										82816.9	3619.71		0.150429	0.00277416		1.49443	0.0560418		0.0721025	0.00238818			0.0372364	0.000713468			903.4	15.5		928.1	22.8		987.8	67.4
https://doi.org/10.1130/B35404.1	[0013]	13GB01	YZ-28-1	OROGEN	NW China	Beishan Orogen / Central Asian Orogenic Belt	Metagreywacke	Amphibolite	Metagreywacke		Xenocryst	LAICPMS										61840	5379.23		0.176554	0.00324456		1.77986	0.0550183		0.072866	0.00192214			0.0518136	0.0011931			1048.1	17.8		1038.1	20.1		1009.4	53.4
https://doi.org/10.1130/B35404.1	[0013]	13GB01	YZ-28-3	OROGEN	NW China	Beishan Orogen / Central Asian Orogenic Belt	Metagreywacke	Amphibolite	Metagreywacke		Xenocryst	LAICPMS										68398	5695.24		0.176353	0.00245508		1.81531	0.0520982		0.0743245	0.00192203			0.0470186	0.000820954			1047	13.5		1051	18.8		1049.3	52.1
https://doi.org/10.1130/B35404.1	[0013]	16JS87	87-2-1	OROGEN	NW China	Beishan Orogen / Central Asian Orogenic Belt	Metagreywacke	Amphibolite	Metagreywacke		Xenocryst	LAICPMS										40845.8	2412.49		0.145213	0.00200461		1.3603	0.0365944		0.0681728	0.00189084			0.0450606	0.00067153			874.1	11.3		872	15.7		872.8	57.4
https://doi.org/10.1130/B35404.1	[0013]	16JS87	87-2-2	OROGEN	NW China	Beishan Orogen / Central Asian Orogenic Belt	Metagreywacke	Amphibolite	Metagreywacke		Xenocryst	LAICPMS										38653.8	4542.52		0.149294	0.00177218		1.41677	0.033483		0.0685616	0.00157087			0.0456042	0.000723477			896.98	9.93		896	14.1		884.6	47.3
https://doi.org/10.1130/B35404.1	[0013]	16JS87	87-2-3	OROGEN	NW China	Beishan Orogen / Central Asian Orogenic Belt	Metagreywacke	Amphibolite	Metagreywacke		Xenocryst	LAICPMS										44606.3	2938.21		0.153398	0.00204575		1.41506	0.0365836		0.0669667	0.00175169			0.04477	0.000692371			920	11.5		895.3	15.4		835.9	54.4
https://doi.org/10.1130/B35404.1	[0013]	16JS87	87-2-4	OROGEN	NW China	Beishan Orogen / Central Asian Orogenic Belt	Metagreywacke	Amphibolite	Metagreywacke		Xenocryst	LAICPMS										40268.2	5280.56		0.158453	0.0022148		1.54286	0.0334242		0.0704308	0.0014225			0.0464128	0.000795798			948.2	12.3		947.6	13.3		940	41.3
https://doi.org/10.1130/B35404.1	[0013]	16JS87	87-2-5	OROGEN	NW China	Beishan Orogen / Central Asian Orogenic Belt	Metagreywacke	Amphibolite	Metagreywacke		Xenocryst	LAICPMS										42496.4	4769.16		0.175469	0.00237895		1.7677	0.0388817		0.0728128	0.00149693			0.0515294	0.000848964			1042.2	13.1		1033.7	14.3		1007.8	41.8
https://doi.org/10.1130/B35404.1	[0013]	16JS87	87-2-6	OROGEN	NW China	Beishan Orogen / Central Asian Orogenic Belt	Metagreywacke	Amphibolite	Metagreywacke		Xenocryst	LAICPMS										41624.9	2527.93		0.142743	0.00215537		1.31974	0.032821		0.0668887	0.00155538			0.0450633	0.000604949			860.1	12.2		854.4	14.4		833.4	48.6
https://doi.org/10.1130/B35404.1	[0013]	16JS87	87-2-7	OROGEN	NW China	Beishan Orogen / Central Asian Orogenic Belt	Metagreywacke	Amphibolite	Metagreywacke		Xenocryst	LAICPMS										41618.5	1820.48		0.149368	0.00197779		1.40212	0.0421091		0.0680016	0.00203028			0.0473577	0.000787446			897.4	11.1		889.8	17.8		867.6	61.9
https://doi.org/10.1130/B35404.1	[0013]	16JS87	87-3-1	OROGEN	NW China	Beishan Orogen / Central Asian Orogenic Belt	Metagreywacke	Amphibolite	Metagreywacke		Xenocryst	LAICPMS										41264.9	1577.2		0.146148	0.00219577		1.37582	0.0478142		0.0685395	0.00240725			0.0438285	0.000675199			879.3	12.4		878.7	20.4		884	72.7
https://doi.org/10.1130/B35404.1	[0013]	16JS87	87-3-2	OROGEN	NW China	Beishan Orogen / Central Asian Orogenic Belt	Metagreywacke	Amphibolite	Metagreywacke		Xenocryst	LAICPMS										48265.4	1353.24		0.149556	0.00235813		1.38616	0.0457829		0.0676909	0.00232247			0.044397	0.000683456			898.5	13.2		883.1	19.5		858.1	71.2
https://doi.org/10.1130/B35404.1	[0013]	16JS87	87-3-3	OROGEN	NW China	Beishan Orogen / Central Asian Orogenic Belt	Metagreywacke	Amphibolite	Metagreywacke		Xenocryst	LAICPMS										45548.5	1284.59		0.131291	0.002223		1.25796	0.0423074		0.0697243	0.0023345			0.0427031	0.00081465			795.2	12.7		827	19		919.2	68.7
https://doi.org/10.1130/B35404.1	[0013]	16JS87	87-3-4	OROGEN	NW China	Beishan Orogen / Central Asian Orogenic Belt	Metagreywacke	Amphibolite	Metagreywacke		Xenocryst	LAICPMS										42923.1	2143.35		0.13596	0.00183693		1.24817	0.0347338		0.0666909	0.00188008			0.0431912	0.000635792			821.8	10.4		822.6	15.7		827.2	58.8
https://doi.org/10.1130/B35404.1	[0013]	16JS87	87-3-5	OROGEN	NW China	Beishan Orogen / Central Asian Orogenic Belt	Metagreywacke	Amphibolite	Metagreywacke		Xenocryst	LAICPMS										41901.6	3834.33		0.145564	0.00199624		1.40605	0.0388459		0.069556	0.00168346			0.0415691	0.00067363			876	11.3		891.5	16.4		914.5	49.7
https://doi.org/10.1130/B35404.1	[0013]	16JS87	87-7-1	OROGEN	NW China	Beishan Orogen / Central Asian Orogenic Belt	Metagreywacke	Amphibolite	Metagreywacke		Xenocryst	LAICPMS										55433.7	847.191		0.15453	0.00224372		1.50771	0.063713		0.070873	0.00304945			0.0458807	0.00085092			926.3	12.5		933.5	25.8		952.7	88
https://doi.org/10.1130/B35404.1	[0013]	16JS87	87-7-2	OROGEN	NW China	Beishan Orogen / Central Asian Orogenic Belt	Metagreywacke	Amphibolite	Metagreywacke		Xenocryst	LAICPMS										49378.3	741.525		0.147806	0.00243965		1.39069	0.0654041		0.0683935	0.00323208			0.0436871	0.000650375			888.7	13.7		885	27.8		879.5	97.7
https://doi.org/10.1130/B35404.1	[0013]	16JS87	87-7-3	OROGEN	NW China	Beishan Orogen / Central Asian Orogenic Belt	Metagreywacke	Amphibolite	Metagreywacke		Xenocryst	LAICPMS										49997.2	845.018		0.151688	0.00251308		1.44521	0.0516931		0.0693495	0.00235548			0.0477652	0.000735408			910.4	14		907.9	21.5		908.2	70.1
https://doi.org/10.1130/B35404.1	[0013]	16JS87	87-7-4	OROGEN	NW China	Beishan Orogen / Central Asian Orogenic Belt	Metagreywacke	Amphibolite	Metagreywacke		Xenocryst	LAICPMS										49071.2	830.328		0.167182	0.00400969		1.54733	0.0882969		0.0666018	0.00297797			0.0542111	0.00156972			996.6	22.1		949.4	35.2		824.4	93.4
https://doi.org/10.1130/B35404.1	[0013]	16JS87	87-7-5	OROGEN	NW China	Beishan Orogen / Central Asian Orogenic Belt	Metagreywacke	Amphibolite	Metagreywacke		Xenocryst	LAICPMS										57365.8	866.541		0.15155	0.00251359		1.50562	0.0670649		0.0722643	0.00325471			0.0459626	0.000937695			909.6	14.1		932.7	27.2		992.4	91.4
https://doi.org/10.1130/B35404.1	[0013]	16JS87	87-8-1	OROGEN	NW China	Beishan Orogen / Central Asian Orogenic Belt	Metagreywacke	Amphibolite	Metagreywacke		Xenocryst	LAICPMS										39861.5	990.566		0.153485	0.00236926		1.46517	0.0548451		0.0702605	0.00288669			0.0475556	0.00073877			920.4	13.2		916.1	22.6		935	84.4
https://doi.org/10.1130/B35404.1	[0013]	16JS87	87-9-1	OROGEN	NW China	Beishan Orogen / Central Asian Orogenic Belt	Metagreywacke	Amphibolite	Metagreywacke		Xenocryst	LAICPMS										49552.7	1347.21		0.155432	0.00239787		1.4966	0.0485444		0.0703631	0.00229341			0.0467022	0.000622301			931.3	13.4		929	19.7		938	66.7
https://doi.org/10.1130/B35404.1	[0013]	16JS87	87-10-1	OROGEN	NW China	Beishan Orogen / Central Asian Orogenic Belt	Metagreywacke	Amphibolite	Metagreywacke		Xenocryst	LAICPMS										51046.5	1093.11		0.146204	0.002046		1.3896	0.0459861		0.0695166	0.00241092			0.0461321	0.000657192			879.6	11.5		884.5	19.5		913.3	71.3
https://doi.org/10.1130/B35404.1	[0013]	16JS87	87-11-1	OROGEN	NW China	Beishan Orogen / Central Asian Orogenic Belt	Metagreywacke	Amphibolite	Metagreywacke		Xenocryst	LAICPMS										49722.8	1250.51		0.145183	0.00226153		1.42103	0.053935		0.0712997	0.0026484			0.0444626	0.000674479			873.9	12.7		897.8	22.6		965.1	75.9
https://doi.org/10.1130/B35404.1	[0013]	16JS87	87-11-2	OROGEN	NW China	Beishan Orogen / Central Asian Orogenic Belt	Metagreywacke	Amphibolite	Metagreywacke		Xenocryst	LAICPMS										48265.5	862.949		0.147569	0.00225514		1.37747	0.0560396		0.0682906	0.00281665			0.0432356	0.000667227			887.3	12.7		879.4	23.9		876.4	85.5
https://doi.org/10.1130/B35404.1	[0013]	16JS87	87-11-3	OROGEN	NW China	Beishan Orogen / Central Asian Orogenic Belt	Metagreywacke	Amphibolite	Metagreywacke		Xenocryst	LAICPMS										42681.5	1914.17		0.153605	0.00269		1.49034	0.0568057		0.0712248	0.00273115			0.0480228	0.000640492			921.2	15		926.5	23.2		962.8	78.3
https://doi.org/10.1130/B35404.1	[0013]	16JS87	87-11-4	OROGEN	NW China	Beishan Orogen / Central Asian Orogenic Belt	Metagreywacke	Amphibolite	Metagreywacke		Xenocryst	LAICPMS										49345.3	1616.39		0.147781	0.00233923		1.41949	0.0466937		0.070192	0.00230232			0.0447125	0.000773575			888.5	13.1		897.1	19.6		933	67.2
https://doi.org/10.1130/B35404.1	[0013]	16JS87	87-11-5	OROGEN	NW China	Beishan Orogen / Central Asian Orogenic Belt	Metagreywacke	Amphibolite	Metagreywacke		Xenocryst	LAICPMS										50278	1502.74		0.14626	0.00245165		1.48297	0.0524157		0.0738539	0.0024425			0.045329	0.000675121			880	13.8		923.4	21.4		1036.5	66.7
https://doi.org/10.1130/B35404.1	[0013]	16JS87	87-13-1	OROGEN	NW China	Beishan Orogen / Central Asian Orogenic Belt	Metagreywacke	Amphibolite	Metagreywacke		Xenocryst	LAICPMS										48246.4	1434.01		0.16665	0.00277736		1.63088	0.0601483		0.0709921	0.00241731			0.0455339	0.000629015			993.6	15.4		982.2	23.2		956.2	69.7
https://doi.org/10.1130/B35404.1	[0013]	16JS87	87-13-2	OROGEN	NW China	Beishan Orogen / Central Asian Orogenic Belt	Metagreywacke	Amphibolite	Metagreywacke		Xenocryst	LAICPMS										61364.2	4581.53		0.189763	0.00241744		2.01992	0.053404		0.0772783	0.00194538			0.0565948	0.000868189			1120.1	13.1		1122.2	18		1127.5	50.3
https://doi.org/10.1130/B35404.1	[0013]	16JS87	87-13-3	OROGEN	NW China	Beishan Orogen / Central Asian Orogenic Belt	Metagreywacke	Amphibolite	Metagreywacke		Xenocryst	LAICPMS										48845.7	3675.91		0.166841	0.0023825		1.61966	0.0439404		0.0708838	0.00186088			0.0472798	0.000666254			994.7	13.1		977.9	17		953	53.7
https://doi.org/10.1130/B35404.1	[0013]	16JS87	87-14-1	OROGEN	NW China	Beishan Orogen / Central Asian Orogenic Belt	Metagreywacke	Amphibolite	Metagreywacke		Xenocryst	LAICPMS										628.508	2968.2		0.145888	0.00295001		1.38826	0.0439444		0.0694595	0.00199827			0.0490146	0.00255669			877.9	16.6		884	18.7		911.5	59.3
https://doi.org/10.1130/B35404.1	[0013]	16JS87	87-14-2	OROGEN	NW China	Beishan Orogen / Central Asian Orogenic Belt	Metagreywacke	Amphibolite	Metagreywacke		Xenocryst	LAICPMS										1145.46	3489.51		0.147536	0.0025586		1.41164	0.0423192		0.0693364	0.00172335			0.0419874	0.00111732			887.2	14.4		893.8	17.8		907.9	51.1
https://doi.org/10.1130/B35404.1	[0013]	16JS87	87-15-1	OROGEN	NW China	Beishan Orogen / Central Asian Orogenic Belt	Metagreywacke	Amphibolite	Metagreywacke		Xenocryst	LAICPMS										54985.9	2161.13		0.17094	0.0053124		1.76375	0.0905709		0.0751738	0.0027423			0.0526722	0.00294634			1017.3	29.2		1032.2	33.3		1072.1	73.2
https://doi.org/10.1130/B35404.1	[0013]	16JS87	87-15-2	OROGEN	NW China	Beishan Orogen / Central Asian Orogenic Belt	Metagreywacke	Amphibolite	Metagreywacke		Xenocryst	LAICPMS										67042	4297.71		0.174536	0.00348113		1.83125	0.0516605		0.07635	0.00190851			0.0499608	0.00107495			1037.1	19.1		1056.7	18.5		1103.4	50
https://doi.org/10.1002/gj.3756	[0014]	LZ-1	LZ-1-Mnz-01	OROGEN	South Tibet	South Tibetan Detachment System / Himalayan Orogen	Leucogranite		Two-mica granite dyke		Igneous	LAICPMS										77231.9	5929.71	122.2	0.00405602		0.000145308	0.0407419		0.00476947	0.076254		0.0107658	0.306027	0.00119832		2.22867e-05		26.0939		0.933036	40.5482		4.65334	1101.85		285.185	24.2063
https://doi.org/10.1002/gj.3756	[0014]	LZ-1	LZ-1-Mnz-03	OROGEN	South Tibet	South Tibetan Detachment System / Himalayan Orogen	Leucogranite		Two-mica granite dyke		Igneous	LAICPMS										58898.7	3769.03	89.9543	0.00418047		0.000131213	0.0400731		0.00455137	0.0714197		0.00913902	0.276352	0.00119755		2.04633e-05		26.8929		0.842458	39.8955		4.44341	968.515		263.728	24.1906
https://doi.org/10.1002/gj.3756	[0014]	LZ-1	LZ-1-Mnz-08	OROGEN	South Tibet	South Tibetan Detachment System / Himalayan Orogen	Leucogranite		Two-mica granite dyke		Igneous	LAICPMS										61304.1	4446.25	95.7309	0.00421266		0.000120756	0.0413282		0.00460973	0.0721528		0.00796087	0.256994	0.00121054		1.98578e-05		27.0995		0.775317	41.1199		4.49496	990.74		225.925	24.4529
https://doi.org/10.1002/gj.3756	[0014]	LZ-1	LZ-1-Mnz-10	OROGEN	South Tibet	South Tibetan Detachment System / Himalayan Orogen	Leucogranite		Two-mica granite dyke		Igneous	LAICPMS										67134.7	4021.73	102.67	0.00425208		0.000126757	0.0402246		0.00407875	0.069936		0.00824488	0.293992	0.00122811		2.12031e-05		27.3526		0.813805	40.0433		3.98144	927.775		243.36	24.8076
https://doi.org/10.1002/gj.3756	[0014]	LZ-1	LZ-1-Mnz-11	OROGEN	South Tibet	South Tibetan Detachment System / Himalayan Orogen	Leucogranite		Two-mica granite dyke		Igneous	LAICPMS										83749.7	7406.93	135.39	0.00403785		0.000108905	0.0356343		0.00333569	0.064997		0.00642961	0.288125	0.00121444		1.91552e-05		25.9772		0.699366	35.5527		3.27055	775.93		209.702	24.5317
https://doi.org/10.1002/gj.3756	[0014]	LZ-2	LZ-2-Mnz-01	OROGEN	South Tibet	South Tibetan Detachment System / Himalayan Orogen	Leucogranite		Garnet-bearing muscovite granite dyke		Igneous	LAICPMS										54200.9	5655.08	50.7612	0.00223053		0.000110982	0.0297926		0.0040013	0.0993078		0.0144775	0.37047	0.000674764		1.96483e-05		14.3629		0.713888	29.8091		3.94536	1612.96		269.447	13.6339
https://doi.org/10.1002/gj.3756	[0014]	LZ-2	LZ-2-Mnz-02	OROGEN	South Tibet	South Tibetan Detachment System / Himalayan Orogen	Leucogranite		Garnet-bearing muscovite granite dyke		Igneous	LAICPMS										41339.6	4591.87	38.8025	0.00224436		9.58821e-05	0.021921		0.00301332	0.0721789		0.011759	0.310786	0.000666996		1.8216e-05		14.4518		0.616761	22.0178		2.99408	990.74		339.805	13.477
https://doi.org/10.1002/gj.3756	[0014]	LZ-2	LZ-2-Mnz-05	OROGEN	South Tibet	South Tibetan Detachment System / Himalayan Orogen	Leucogranite		Garnet-bearing muscovite granite dyke		Igneous	LAICPMS										64803.9	6120.83	64.1961	0.00256001		8.17254e-05	0.0224093		0.00260317	0.0644532		0.00806762	0.274816	0.000733635		1.50653e-05		16.4818		0.525566	22.5028		2.58533	766.67		266.645	14.823
https://doi.org/10.1002/gj.3756	[0014]	LZ-2	LZ-2-Mnz-06	OROGEN	South Tibet	South Tibetan Detachment System / Himalayan Orogen	Leucogranite		Garnet-bearing muscovite granite dyke		Igneous	LAICPMS										61680.6	4799.44	54.0279	0.00235567		8.86152e-05	0.0282023		0.00326405	0.0909145		0.0121586	0.325028	0.000673739		1.51017e-05		15.1678		0.569966	28.2397		3.22341	1455.56		257.098	13.6132
https://doi.org/10.1002/gj.3756	[0014]	LZ-2	LZ-2-Mnz-09	OROGEN	South Tibet	South Tibetan Detachment System / Himalayan Orogen	Leucogranite		Garnet-bearing muscovite granite dyke		Igneous	LAICPMS										55544.9	6751.64	64.374	0.00269734		0.000107887	0.0304378		0.00286914	0.0866023		0.00975213	0.42432	0.000826077		2.8842e-05		17.3648		0.693674	30.445		2.8273	1351.54		218.985	16.69
https://doi.org/10.1002/gj.3756	[0014]	LZ-2	LZ-2-Mnz-10	OROGEN	South Tibet	South Tibetan Detachment System / Himalayan Orogen	Leucogranite		Garnet-bearing muscovite granite dyke		Igneous	LAICPMS										70808	5269.78	115.252	0.00429531		0.000123744	0.0392697		0.0044884	0.0669904		0.00836944	0.252055	0.00129845		2.24885e-05		27.6301		0.794435	39.1108		4.38532	838.885		262.945	26.2276
https://doi.org/10.1002/gj.3756	[0014]	LZ-2	LZ-2-Mnz-12	OROGEN	South Tibet	South Tibetan Detachment System / Himalayan Orogen	Leucogranite		Garnet-bearing muscovite granite dyke		Igneous	LAICPMS										73087.2	2854.7	56.1803	0.00233727		0.000123904	0.0300244		0.00423167	0.0997052		0.018117	0.37613	0.000670933		1.57743e-05		15.0494		0.796915	30.0375		4.17157	1620.37		344.447	13.5565
https://doi.org/10.1002/gj.3756	[0014]	LZ-2	LZ-2-Mnz-13	OROGEN	South Tibet	South Tibetan Detachment System / Himalayan Orogen	Leucogranite		Garnet-bearing muscovite granite dyke		Igneous	LAICPMS										59290	3738.97	48.9109	0.00229623		9.84178e-05	0.0259346		0.00338061	0.0892112		0.0145017	0.328808	0.000671045		1.31247e-05		14.7855		0.633039	25.9978		3.34589	1409.26		315.275	13.5588
https://doi.org/10.1002/gj.3756	[0014]	LZ-2	LZ-2-Mnz-15	OROGEN	South Tibet	South Tibetan Detachment System / Himalayan Orogen	Leucogranite		Garnet-bearing muscovite granite dyke		Igneous	LAICPMS										53646	4722.08	47.4015	0.00223224		9.44114e-05	0.0307325		0.00423042	0.107466		0.0178676	0.307254	0.000675218		3.41142e-05		14.3739		0.607309	30.7353		4.16747	1766.66		309.105	13.6431
https://doi.org/10.1002/gj.3756	[0014]	LZ-2	LZ-2-Mnz-16	OROGEN	South Tibet	South Tibetan Detachment System / Himalayan Orogen	Leucogranite		Garnet-bearing muscovite granite dyke		Igneous	LAICPMS										61359.5	3840.51	50.7109	0.00231503		0.000134964	0.0335653		0.00508128	0.114549		0.0207379	0.385106	0.000682811		1.73831e-05		14.9064		0.868064	33.5222		4.99194	1872.53		331.48	13.7964
https://doi.org/10.1002/gj.3756	[0014]	KJ-1	KJ-1-Mnz-01	OROGEN	South Tibet	South Tibetan Detachment System / Himalayan Orogen	Leucogranite		Muscovite granite boudin		Igneous	LAICPMS										96205.5	3027.49	50.61	0.00350388		0.00025179	0.0447305		0.00794859	0.104071		0.0220309	0.404393	0.00120488		4.48437e-05		22.548		1.61752	44.4322		7.72536	1698.15		394.29	24.3387
https://doi.org/10.1002/gj.3756	[0014]	KJ-1	KJ-1-Mnz-02	OROGEN	South Tibet	South Tibetan Detachment System / Himalayan Orogen	Leucogranite		Muscovite granite boudin		Igneous	LAICPMS										92158.8	3069.96	46.9938	0.00349601		0.000194164	0.0395985		0.00715426	0.0908857		0.0196831	0.307405	0.00114631		3.15904e-05		22.4974		1.24736	39.432		6.98767	1444.14		422.225	23.1562
https://doi.org/10.1002/gj.3756	[0014]	KJ-1	KJ-1-Mnz-03	OROGEN	South Tibet	South Tibetan Detachment System / Himalayan Orogen	Leucogranite		Muscovite granite boudin		Igneous	LAICPMS										98456.7	4109.72	55.3092	0.00362713		0.000170079	0.0312827		0.00560647	0.0637866		0.0124052	0.261639	0.00120272		3.45177e-05		23.3396		1.09251	31.2772		5.52008	744.45		422.19	24.2951
https://doi.org/10.1002/gj.3756	[0014]	KJ-1	KJ-1-Mnz-04	OROGEN	South Tibet	South Tibetan Detachment System / Himalayan Orogen	Leucogranite		Muscovite granite boudin		Igneous	LAICPMS										73940.8	2169.52	38.5219	0.00375083		0.000203089	0.0433856		0.00734167	0.0848862		0.0154753	0.319971	0.001205		3.1101e-05		24.1342		1.30437	43.1242		7.14469	1322.22		360.34	24.3411
https://doi.org/10.1002/gj.3756	[0014]	KJ-1	KJ-1-Mnz-05	OROGEN	South Tibet	South Tibetan Detachment System / Himalayan Orogen	Leucogranite		Muscovite granite boudin		Igneous	LAICPMS										100524	4008.09	56.3502	0.00381869		0.000145097	0.0289398		0.00508486	0.0544455		0.0104776	0.216253	0.00120704		2.44027e-05		24.57		0.931892	28.9679		5.01791	390.79		381.435	24.3822
https://doi.org/10.1002/gj.3756	[0014]	KJ-1	KJ-1-Mnz-06	OROGEN	South Tibet	South Tibetan Detachment System / Himalayan Orogen	Leucogranite		Muscovite granite boudin		Igneous	LAICPMS										101482	3737.45	55.5788	0.00375684		0.000165316	0.0298828		0.00557929	0.0591478		0.0122063	0.235687	0.00119676		2.80215e-05		24.1728		1.06179	29.898		5.50078	572.255		456.433	24.1748
https://doi.org/10.1002/gj.3756	[0014]	KJ-1	KJ-1-Mnz-07	OROGEN	South Tibet	South Tibetan Detachment System / Himalayan Orogen	Leucogranite		Muscovite granite boudin		Igneous	LAICPMS										73784.8	2573	40.1416	0.00368177		0.00019047	0.0340277		0.00717796	0.0675917		0.0154805	0.245246	0.00121191		2.83157e-05		23.6906		1.22341	33.9763		7.04857	857.4		486.077	24.4805
https://doi.org/10.1002/gj.3756	[0014]	KJ-1	KJ-1-Mnz-08	OROGEN	South Tibet	South Tibetan Detachment System / Himalayan Orogen	Leucogranite		Muscovite granite boudin		Igneous	LAICPMS										93730.9	3264.14	51.3581	0.00387209		0.000280681	0.0311409		0.0067814	0.0640863		0.0160658	0.332874	0.00120603		2.81328e-05		24.9129		1.80246	31.1376		6.6778	746.3		582.362	24.3619
https://doi.org/10.1002/gj.3756	[0014]	KJ-1	KJ-1-Mnz-09	OROGEN	South Tibet	South Tibetan Detachment System / Himalayan Orogen	Leucogranite		Muscovite granite boudin		Igneous	LAICPMS										88470.3	2890.21	45.3437	0.00356904		0.000149816	0.0363321		0.007453	0.0754322		0.0169142	0.204628	0.00114829		2.78121e-05		22.9666		0.962419	36.2366		7.30238	1079.63		462.947	23.1961
https://doi.org/10.1002/gj.3756	[0014]	KJ-1	KJ-1-Mnz-10	OROGEN	South Tibet	South Tibetan Detachment System / Himalayan Orogen	Leucogranite		Muscovite granite boudin		Igneous	LAICPMS										99780.3	4231.18	56.3541	0.00367898		0.000140437	0.0283128		0.00476689	0.0573059		0.0104529	0.226727	0.00118729		2.24596e-05		23.6727		0.90209	28.3488		4.70699	501.89		409.207	23.9836
https://doi.org/10.1002/gj.3756	[0014]	KJ-1	KJ-1-Mnz-11	OROGEN	South Tibet	South Tibetan Detachment System / Himalayan Orogen	Leucogranite		Muscovite granite boudin		Igneous	LAICPMS										107960	3755.11	59.0252	0.00373984		0.000155506	0.030473		0.0048034	0.0614631		0.0107744	0.263792	0.00120473		2.30689e-05		24.0636		0.998806	30.4797		4.73311	655.26		380.522	24.3357
https://doi.org/10.1002/gj.3756	[0014]	KJ-1	KJ-1-Mnz-12	OROGEN	South Tibet	South Tibetan Detachment System / Himalayan Orogen	Leucogranite		Muscovite granite boudin		Igneous	LAICPMS										97802.2	2886.43	51.8397	0.00362923		0.000146192	0.0356441		0.00565712	0.0725361		0.0123133	0.253806	0.00121526		2.79237e-05		23.3532		0.939092	35.5623		5.54649	1011.11		354.62	24.5483
https://doi.org/10.1002/gj.3756	[0014]	KJ-1	KJ-1-Mnz-13	OROGEN	South Tibet	South Tibetan Detachment System / Himalayan Orogen	Leucogranite		Muscovite granite boudin		Igneous	LAICPMS										82629.7	3077.49	45.9858	0.00382915		0.000170994	0.0311783		0.00464765	0.0624351		0.0105001	0.299571	0.00118902		3.04895e-05		24.6372		1.09818	31.1745		4.5765	700.01		364.783	24.0185
https://doi.org/10.1002/gj.3756	[0014]	KJ-1	KJ-1-Mnz-14	OROGEN	South Tibet	South Tibetan Detachment System / Himalayan Orogen	Leucogranite		Muscovite granite boudin		Igneous	LAICPMS										102366	3795.25	56.1645	0.00375675		0.000127781	0.0320643		0.00465107	0.0635138		0.00950283	0.234489	0.00117409		2.52551e-05		24.1722		0.820751	32.0465		4.57595	724.08		321.113	23.7171
https://doi.org/10.1002/gj.3756	[0014]	KJ-1	KJ-1-Mnz-15	OROGEN	South Tibet	South Tibetan Detachment System / Himalayan Orogen	Leucogranite		Muscovite granite boudin		Igneous	LAICPMS										90861.2	2943.05	48.8208	0.00377494		0.000138798	0.0352785		0.00554097	0.0717494		0.01275	0.234099	0.00118524		2.63176e-05		24.289		0.891483	35.2038		5.43453	988.89		368.502	23.9422
https://doi.org/10.1002/gj.3756	[0014]	KJ-1	KJ-1-Mnz-16	OROGEN	South Tibet	South Tibetan Detachment System / Himalayan Orogen	Leucogranite		Muscovite granite boudin		Igneous	LAICPMS										72312.4	2717.67	39.9964	0.00389683		0.000168818	0.0376307		0.00553383	0.0741571		0.0124059	0.294595	0.00115625		2.88096e-05		25.0718		1.08413	37.5082		5.41524	1055.56		343.045	23.357
https://doi.org/10.1002/gj.3756	[0014]	KJ-1	KJ-1-Mnz-17	OROGEN	South Tibet	South Tibetan Detachment System / Himalayan Orogen	Leucogranite		Muscovite granite boudin		Igneous	LAICPMS										99568.1	3427.2	53.2898	0.00368956		0.000170373	0.0314594		0.0058179	0.0661998		0.0140502	0.249696	0.0011614		3.58447e-05		23.7407		1.09433	31.4512		5.72726	812.96		451.665	23.4609
https://doi.org/10.1002/gj.3756	[0014]	KJ-1	KJ-1-Mnz-18	OROGEN	South Tibet	South Tibetan Detachment System / Himalayan Orogen	Leucogranite		Muscovite granite boudin		Igneous	LAICPMS										77439.5	2789.26	42.6987	0.00364874		0.000163112	0.0326887		0.00438401	0.0655191		0.00917046	0.333326	0.00119475		2.74851e-05		23.4785		1.04774	32.6606		4.3106	790.74		298.127	24.1342
https://doi.org/10.1002/gj.3756	[0014]	KJ-1	KJ-1-Mnz-19	OROGEN	South Tibet	South Tibetan Detachment System / Himalayan Orogen	Leucogranite		Muscovite granite boudin		Igneous	LAICPMS										98143.8	3160.03	52.6088	0.00372427		0.000127649	0.0379598		0.00505425	0.0772634		0.0117489	0.25742	0.00117613		2.33469e-05		23.9636		0.819925	37.8302		4.94438	1127.79		307.408	23.7582
https://doi.org/10.1002/gj.3756	[0014]	KJ-1	KJ-1-Mnz-20	OROGEN	South Tibet	South Tibetan Detachment System / Himalayan Orogen	Leucogranite		Muscovite granite boudin		Igneous	LAICPMS										86637.6	3243.94	47.2644	0.00363596		0.000163459	0.0327198		0.00427955	0.0672806		0.00957716	0.34372	0.00115825		2.70323e-05		23.3964		1.04999	32.6912		4.20777	855.55		300.442	23.3973
https://doi.org/10.1002/gj.3756	[0014]	KJ-1	KJ-1-Mnz-21	OROGEN	South Tibet	South Tibetan Detachment System / Himalayan Orogen	Leucogranite		Muscovite granite boudin		Igneous	LAICPMS										90468.2	3056.4	48.7496	0.00363901		0.000136679	0.0342618		0.00568341	0.0695656		0.011785	0.226423	0.00116885		3.07137e-05		23.416		0.877988	34.2062		5.57971	916.665		355.535	23.6113
https://doi.org/10.1002/gj.3756	[0014]	KJ-1	KJ-1-Mnz-22	OROGEN	South Tibet	South Tibetan Detachment System / Himalayan Orogen	Leucogranite		Muscovite granite boudin		Igneous	LAICPMS										99212.5	3102.19	52.961	0.00375051		0.000144275	0.0324465		0.00504274	0.0643754		0.0107538	0.247515	0.00117591		2.51381e-05		24.1321		0.926673	32.4224		4.95945	753.71		359.233	23.7537
https://doi.org/10.1002/gj.3756	[0014]	KJ-1	KJ-1-Mnz-23	OROGEN	South Tibet	South Tibetan Detachment System / Himalayan Orogen	Leucogranite		Muscovite granite boudin		Igneous	LAICPMS										96411.3	3101.81	51.5718	0.00379696		0.000171552	0.0344204		0.00524164	0.0680473		0.010672	0.296695	0.00117004		2.75036e-05		24.4305		1.10179	34.3619		5.14522	870.05		329.613	23.6353
https://doi.org/10.1002/gj.3756	[0014]	KJ-1	KJ-1-Mnz-24	OROGEN	South Tibet	South Tibetan Detachment System / Himalayan Orogen	Leucogranite		Muscovite granite boudin		Igneous	LAICPMS										85776.5	3293.96	46.4727	0.00359452		0.000152012	0.0358502		0.00552623	0.076311		0.0131418	0.274346	0.00115136		3.32408e-05		23.1302		0.976501	35.7644		5.4171	1103.39		345.827	23.2582
https://doi.org/10.1002/gj.3756	[0014]	KJ-1	KJ-1-Mnz-25	OROGEN	South Tibet	South Tibetan Detachment System / Himalayan Orogen	Leucogranite		Muscovite granite boudin		Igneous	LAICPMS										93782	3160.33	50.4315	0.00372365		0.000142638	0.0352335		0.00489963	0.0732219		0.0125651	0.275459	0.00117435		2.51484e-05		23.9596		0.916183	35.1596		4.80574	1020.37		386.103	23.7224
https://doi.org/10.1002/gj.3756	[0014]	KJ-1	KJ-1-Mnz-26	OROGEN	South Tibet	South Tibetan Detachment System / Himalayan Orogen	Leucogranite		Muscovite granite boudin		Igneous	LAICPMS										97395.6	3459.06	52.8656	0.00364215		0.000137532	0.0404591		0.00504145	0.0843172		0.0123156	0.303045	0.00116469		3.03627e-05		23.4361		0.883462	40.2722		4.92002	1299.69		287.038	23.5273
https://doi.org/10.1002/gj.3756	[0014]	KJ-1	KJ-1-Mnz-27	OROGEN	South Tibet	South Tibetan Detachment System / Himalayan Orogen	Leucogranite		Muscovite granite boudin		Igneous	LAICPMS										94026.3	3247.78	50.5418	0.00363416		0.000130362	0.0350632		0.00459619	0.0713857		0.00980953	0.273654	0.00118087		2.62054e-05		23.3848		0.83742	34.9927		4.50887	968.515		283.325	23.8539
https://doi.org/10.1002/gj.3756	[0014]	KJ-1	KJ-1-Mnz-28	OROGEN	South Tibet	South Tibetan Detachment System / Himalayan Orogen	Leucogranite		Muscovite granite boudin		Igneous	LAICPMS										89208.7	3630.29	49.8046	0.00376465		0.000147236	0.0348724		0.00442115	0.0682834		0.00915954	0.308486	0.00118191		2.7742e-05		24.223		0.945676	34.8055		4.33796	877.47		280.08	23.8749
https://doi.org/10.1002/gj.3756	[0014]	KJ-1	KJ-1-Mnz-29	OROGEN	South Tibet	South Tibetan Detachment System / Himalayan Orogen	Leucogranite		Muscovite granite boudin		Igneous	LAICPMS										83508.6	3207.65	46.6413	0.00383892		0.000138214	0.0326004		0.00431843	0.0657484		0.0100444	0.271795	0.00120549		2.96904e-05		24.6999		0.887681	32.5738		4.24648	798.15		330.533	24.351
https://doi.org/10.1002/gj.3756	[0014]	KJ-1	KJ-1-Mnz-30	OROGEN	South Tibet	South Tibetan Detachment System / Himalayan Orogen	Leucogranite		Muscovite granite boudin		Igneous	LAICPMS										90219.3	3295.1	49.3092	0.00380604		0.000129011	0.0370811		0.00443369	0.0727169		0.00958657	0.283492	0.00119039		2.51393e-05		24.4887		0.82861	36.9702		4.341	1005.55		265.735	24.0461
https://doi.org/10.1002/gj.3756	[0014]	KJ-1	KJ-1-Mnz-31	OROGEN	South Tibet	South Tibetan Detachment System / Himalayan Orogen	Leucogranite		Muscovite granite boudin		Igneous	LAICPMS										107323	3599.51	56.2411	0.00371896		0.00013715	0.0366987		0.00442899	0.0728141		0.00925441	0.305576	0.00117536		2.54593e-05		23.9295		0.880943	36.5958		4.338	1009.26		259.715	23.7427
https://doi.org/10.1002/gj.3756	[0014]	KJ-2	KJ-2-Mnz-01	OROGEN	South Tibet	South Tibetan Detachment System / Himalayan Orogen	Leucogranite		Tourmaline-bearing muscovite granite		Igneous	LAICPMS										99586.6	34700.1	161.272	0.00275567		5.51901e-05	0.021603		0.00131113	0.057185		0.00361316	0.329991	0.00083095		1.5596e-05		17.7398		0.35493	21.7017		1.30323	498.19		138.87	16.7884
https://doi.org/10.1002/gj.3756	[0014]	KJ-2	KJ-2-Mnz-02	OROGEN	South Tibet	South Tibetan Detachment System / Himalayan Orogen	Leucogranite		Tourmaline-bearing muscovite granite		Igneous	LAICPMS										78177.4	32999.7	135.617	0.00256722		6.30634e-05	0.0199698		0.00210036	0.0560437		0.00590039	0.233557	0.00082758		1.88733e-05		16.5282		0.40559	20.0771		2.09096	453.75		230.525	16.7203
https://doi.org/10.1002/gj.3756	[0014]	KJ-2	KJ-2-Mnz-03	OROGEN	South Tibet	South Tibetan Detachment System / Himalayan Orogen	Leucogranite		Tourmaline-bearing muscovite granite		Igneous	LAICPMS										78015.3	43690.3	162.314	0.00259914		6.47055e-05	0.0189639		0.0030874	0.0522658		0.00936075	0.152914	0.000832254		2.26339e-05		16.7334		0.416135	19.0753		3.07658	298.21		362.915	16.8147
https://doi.org/10.1002/gj.3756	[0014]	KJ-2	KJ-2-Mnz-04	OROGEN	South Tibet	South Tibetan Detachment System / Himalayan Orogen	Leucogranite		Tourmaline-bearing muscovite granite		Igneous	LAICPMS										77965.2	39851.8	147.275	0.0024704		5.49913e-05	0.0173388		0.00369303	0.0499111		0.0118009	0.104511	0.000829456		2.78398e-05		15.9056		0.353728	17.4546		3.68595	190.82		474.01	16.7582
https://doi.org/10.1002/gj.3756	[0014]	KJ-2	KJ-2-Mnz-05	OROGEN	South Tibet	South Tibetan Detachment System / Himalayan Orogen	Leucogranite		Tourmaline-bearing muscovite granite		Igneous	LAICPMS										91293.7	32245.8	145.139	0.00267725		4.86244e-05	0.0191138		0.00473773	0.0505444		0.0143781	0.0732726	0.000829636		1.79038e-05		17.2356		0.312755	19.2247		4.7204	220.44		551.785	16.7618
https://doi.org/10.1002/gj.3756	[0014]	KJ-2	KJ-2-Mnz-06	OROGEN	South Tibet	South Tibetan Detachment System / Himalayan Orogen	Leucogranite		Tourmaline-bearing muscovite granite		Igneous	LAICPMS										93429.9	28475	139.22	0.00274075		6.00227e-05	0.01899		0.00474403	0.049239		0.0141901	0.0876648	0.000842578		2.06982e-05		17.6438		0.385991	19.1013		4.72725	166.75		557.33	17.0232
https://doi.org/10.1002/gj.3756	[0014]	KJ-2	KJ-2-Mnz-07	OROGEN	South Tibet	South Tibetan Detachment System / Himalayan Orogen	Leucogranite		Tourmaline-bearing muscovite granite		Igneous	LAICPMS										93623.3	43247	169.218	0.00258665		5.40943e-05	0.0195533		0.00378943	0.0537573		0.0119485	0.10791	0.000820283		1.84984e-05		16.6531		0.347931	19.6625		3.77395	361.165		436.985	16.5729
https://doi.org/10.1002/gj.3756	[0014]	KJ-2	KJ-2-Mnz-08	OROGEN	South Tibet	South Tibetan Detachment System / Himalayan Orogen	Leucogranite		Tourmaline-bearing muscovite granite		Igneous	LAICPMS										99574.7	32132.4	153.244	0.00277621		5.6727e-05	0.0220423		0.00317695	0.0569511		0.00940519	0.14177	0.000835857		1.97248e-05		17.8718		0.364801	22.1383		3.15628	500.04		370.322	16.8875
https://doi.org/10.1002/gj.3756	[0014]	KJ-2	KJ-2-Mnz-09	OROGEN	South Tibet	South Tibetan Detachment System / Himalayan Orogen	Leucogranite		Tourmaline-bearing muscovite granite		Igneous	LAICPMS										105821	28368.6	149.498	0.00282693		5.84251e-05	0.0243701		0.00310012	0.0618745		0.008414	0.162467	0.000835371		1.92527e-05		18.1978		0.375699	24.4483		3.07296	733.34		293.332	16.8777
https://doi.org/10.1002/gj.3756	[0014]	KJ-2	KJ-2-Mnz-10	OROGEN	South Tibet	South Tibetan Detachment System / Himalayan Orogen	Leucogranite		Tourmaline-bearing muscovite granite		Igneous	LAICPMS										92855.1	26522.5	132.617	0.00272416		7.63548e-05	0.0227152		0.00230622	0.0612879		0.00717803	0.276071	0.000841765		2.06974e-05		17.5372		0.490969	22.8066		2.28974	650.015		253.675	17.0068
https://doi.org/10.1002/gj.3756	[0014]	KJ-2	KJ-2-Mnz-11	OROGEN	South Tibet	South Tibetan Detachment System / Himalayan Orogen	Leucogranite		Tourmaline-bearing muscovite granite		Igneous	LAICPMS										95841.4	28414.6	140.169	0.00284612		6.18349e-05	0.0240763		0.0015892	0.061442		0.00389892	0.329148	0.000833605		1.65582e-05		18.3212		0.397605	24.157		1.5758	653.72		132.39	16.842
https://doi.org/10.1002/gj.3756	[0014]	KJ-2	KJ-2-Mnz-12	OROGEN	South Tibet	South Tibetan Detachment System / Himalayan Orogen	Leucogranite		Tourmaline-bearing muscovite granite		Igneous	LAICPMS										83018	36305.7	145.182	0.00262634		4.39343e-05	0.023857		0.00141432	0.0660375		0.00392406	0.282176	0.000825113		1.71379e-05		16.9083		0.282624	23.9396		1.40271	809.26		124.067	16.6705
https://doi.org/10.1002/gj.3756	[0014]	KJ-2	KJ-2-Mnz-13	OROGEN	South Tibet	South Tibetan Detachment System / Himalayan Orogen	Leucogranite		Tourmaline-bearing muscovite granite		Igneous	LAICPMS										98761.8	30539.6	145.684	0.00274473		5.58161e-05	0.0237904		0.00165223	0.0628473		0.00430339	0.292813	0.000837067		1.63459e-05		17.6694		0.358955	23.8735		1.63875	701.86		146.278	16.9119
https://doi.org/10.1002/gj.3756	[0014]	KJ-2	KJ-2-Mnz-14	OROGEN	South Tibet	South Tibetan Detachment System / Himalayan Orogen	Leucogranite		Tourmaline-bearing muscovite granite		Igneous	LAICPMS										98794.8	30092.9	145.944	0.00280342		6.57455e-05	0.0236091		0.00217606	0.061049		0.00544701	0.254441	0.000832651		2.04902e-05		18.0467		0.422751	23.6936		2.15863	642.61		193.34	16.8227
https://doi.org/10.1002/gj.3756	[0014]	KJ-2	KJ-2-Mnz-15	OROGEN	South Tibet	South Tibetan Detachment System / Himalayan Orogen	Leucogranite		Tourmaline-bearing muscovite granite		Igneous	LAICPMS										96075.6	47170.5	178.222	0.00260745		5.2125e-05	0.020731		0.00134585	0.0576398		0.00372997	0.307932	0.000828853		2.03254e-05		16.7868		0.335268	20.8347		1.33887	516.705		142.575	16.746
https://doi.org/10.1002/gj.3756	[0014]	KJ-2	KJ-2-Mnz-16	OROGEN	South Tibet	South Tibetan Detachment System / Himalayan Orogen	Leucogranite		Tourmaline-bearing muscovite granite		Igneous	LAICPMS										92977.5	36914.2	158.535	0.00272646		4.44002e-05	0.0225527		0.00148935	0.0599833		0.00400619	0.246597	0.000840293		1.57429e-05		17.552		0.285601	22.6452		1.47898	611.13		146.278	16.9771
https://doi.org/10.1002/gj.3756	[0014]	KJ-2	KJ-2-Mnz-17	OROGEN	South Tibet	South Tibetan Detachment System / Himalayan Orogen	Leucogranite		Tourmaline-bearing muscovite granite		Igneous	LAICPMS										86739.9	35396.6	145.704	0.00246709		6.11311e-05	0.0272179		0.00231454	0.080097		0.00685915	0.291385	0.000851254		2.54823e-05		15.8843		0.3932	27.2672		2.28795	1199.08		170.37	17.1984
https://doi.org/10.1002/gj.3756	[0014]	KJ-2	KJ-2-Mnz-18	OROGEN	South Tibet	South Tibetan Detachment System / Himalayan Orogen	Leucogranite		Tourmaline-bearing muscovite granite		Igneous	LAICPMS										106589	24986	148.009	0.00288906		5.81786e-05	0.0232987		0.00162601	0.0586368		0.00415725	0.288546	0.00084975		1.84042e-05		18.5972		0.374098	23.3857		1.61351	553.74		155.535	17.1681
https://doi.org/10.1002/gj.3756	[0014]	KJ-2	KJ-2-Mnz-19	OROGEN	South Tibet	South Tibetan Detachment System / Himalayan Orogen	Leucogranite		Tourmaline-bearing muscovite granite		Igneous	LAICPMS										89421.3	36832.6	158.852	0.00260553		4.31871e-05	0.0208303		0.00128332	0.0581517		0.00366431	0.269041	0.000836636		1.50783e-05		16.7745		0.277826	20.9335		1.27655	600.025		171.275	16.9032
https://doi.org/10.1002/gj.3756	[0014]	KJ-2	KJ-2-Mnz-21	OROGEN	South Tibet	South Tibetan Detachment System / Himalayan Orogen	Leucogranite		Tourmaline-bearing muscovite granite		Igneous	LAICPMS										114836	22744.2	147.949	0.00291825		8.21939e-05	0.0269396		0.00237303	0.0672219		0.00632574	0.319745	0.000838642		2.35875e-05		18.7849		0.528411	26.992		2.3464	855.55		197.06	16.9437
https://doi.org/10.1002/gj.3756	[0014]	KJ-2	KJ-2-Mnz-22	OROGEN	South Tibet	South Tibetan Detachment System / Himalayan Orogen	Leucogranite		Tourmaline-bearing muscovite granite		Igneous	LAICPMS										115691	29982.8	163.395	0.00276665		8.07144e-05	0.0236107		0.00191988	0.0621946		0.00517822	0.358784	0.000840617		2.08003e-05		17.8103		0.518972	23.6953		1.90451	679.64		174.977	16.9836
https://doi.org/10.1002/gj.3756	[0014]	KJ-2	KJ-2-Mnz-23	OROGEN	South Tibet	South Tibetan Detachment System / Himalayan Orogen	Leucogranite		Tourmaline-bearing muscovite granite		Igneous	LAICPMS										93422.2	34533	154.602	0.00264089		6.92971e-05	0.0242592		0.0022825	0.0667479		0.00644518	0.278889	0.000831582		2.30442e-05		17.0018		0.445636	24.3384		2.26278	831.48		203.695	16.8011
https://doi.org/10.1002/gj.3756	[0014]	KJ-2	KJ-2-Mnz-24	OROGEN	South Tibet	South Tibetan Detachment System / Himalayan Orogen	Leucogranite		Tourmaline-bearing muscovite granite		Igneous	LAICPMS										106885	36652.6	169.991	0.00270424		6.54777e-05	0.0232254		0.00160079	0.0625603		0.00454666	0.351298	0.000836508		1.83064e-05		17.4091		0.421063	23.313		1.5886	694.455		155.535	16.9006
https://doi.org/10.1002/gj.3756	[0014]	KJ-2	KJ-2-Mnz-25	OROGEN	South Tibet	South Tibetan Detachment System / Himalayan Orogen	Leucogranite		Tourmaline-bearing muscovite granite		Igneous	LAICPMS										66743.9	44360.9	154.731	0.00257949		5.97332e-05	0.0184568		0.00123384	0.0521266		0.00381218	0.346403	0.0008448		2.46082e-05		16.607		0.384179	18.5699		1.23018	300.06		163.868	17.0681
https://doi.org/10.1002/gj.3756	[0014]	KJ-2	KJ-2-Mnz-26	OROGEN	South Tibet	South Tibetan Detachment System / Himalayan Orogen	Leucogranite		Tourmaline-bearing muscovite granite		Igneous	LAICPMS										82525.6	49616.4	175.602	0.00254628		5.62356e-05	0.0202089		0.00152216	0.0578159		0.00464888	0.293216	0.000822326		2.2968e-05		16.3935		0.361706	20.3151		1.51502	524.11		177.755	16.6142
https://doi.org/10.1002/gj.3756	[0014]	KJ-2	KJ-2-Mnz-27	OROGEN	South Tibet	South Tibetan Detachment System / Himalayan Orogen	Leucogranite		Tourmaline-bearing muscovite granite		Igneous	LAICPMS										89243.1	44428.3	167.907	0.00256249		6.26063e-05	0.0204628		0.00163273	0.0579898		0.00467836	0.3062	0.000831135		3.11152e-05		16.4978		0.402653	20.5678		1.62466	527.815		177.755	16.7921
https://doi.org/10.1002/gj.3756	[0014]	XZ-2	XZ-2-Mnz-01	OROGEN	South Tibet	South Tibetan Detachment System / Himalayan Orogen	Leucogranite		Muscovite granite dyke		Igneous	LAICPMS										124695	6571.98	126.102	0.00267039		8.91032e-05	0.0186743		0.00225308	0.0517353		0.00694236	0.276558	0.00085862		1.17089e-05		17.1915		0.572942	18.7867		2.24584	272.285		281.455	17.3472
https://doi.org/10.1002/gj.3756	[0014]	XZ-2	XZ-2-Mnz-02	OROGEN	South Tibet	South Tibetan Detachment System / Himalayan Orogen	Leucogranite		Muscovite granite dyke		Igneous	LAICPMS										130546	4131.35	122.371	0.00274184		0.000111608	0.0178174		0.00269668	0.0497002		0.00861084	0.268947	0.000844404		1.43325e-05		17.6509		0.717565	17.9322		2.69025	188.97		353.66	17.0601
https://doi.org/10.1002/gj.3756	[0014]	XZ-2	XZ-2-Mnz-03	OROGEN	South Tibet	South Tibetan Detachment System / Himalayan Orogen	Leucogranite		Muscovite granite dyke		Igneous	LAICPMS										122208	6860.16	125.435	0.00275788		9.23787e-05	0.0209341		0.00260577	0.056483		0.00777001	0.2691	0.000871935		1.35878e-05		17.754		0.593951	21.0367		2.59165	472.265		274.965	17.6161
https://doi.org/10.1002/gj.3756	[0014]	XZ-2	XZ-2-Mnz-04	OROGEN	South Tibet	South Tibetan Detachment System / Himalayan Orogen	Leucogranite		Muscovite granite dyke		Igneous	LAICPMS										133263	7384.61	136.387	0.00278224		8.2542e-05	0.0181377		0.00235655	0.0487505		0.00708384	0.228342	0.000871048		1.34366e-05		17.9105		0.530712	18.2517		2.3502	200.075		255.525	17.5982
https://doi.org/10.1002/gj.3756	[0014]	XZ-2	XZ-2-Mnz-05	OROGEN	South Tibet	South Tibetan Detachment System / Himalayan Orogen	Leucogranite		Muscovite granite dyke		Igneous	LAICPMS										96673.1	3330.65	92.6721	0.00282378		0.000108947	0.0289888		0.00473026	0.0788438		0.0144045	0.236445	0.000854233		1.50982e-05		18.1776		0.700409	29.0162		4.66776	1168.52		363.887	17.2586
https://doi.org/10.1002/gj.3756	[0014]	XZ-2	XZ-2-Mnz-06	OROGEN	South Tibet	South Tibetan Detachment System / Himalayan Orogen	Leucogranite		Muscovite granite dyke		Igneous	LAICPMS										161985	8190.29	164.776	0.00283998		7.42815e-05	0.0197759		0.00241622	0.0514634		0.00710851	0.214074	0.000870902		1.27825e-05		18.2817		0.477596	19.8841		2.40585	261.175		288.86	17.5952
https://doi.org/10.1002/gj.3756	[0014]	XZ-2	XZ-2-Mnz-07	OROGEN	South Tibet	South Tibetan Detachment System / Himalayan Orogen	Leucogranite		Muscovite granite dyke		Igneous	LAICPMS										148402	9278.96	153.619	0.00279105		7.09702e-05	0.0194823		0.00231583	0.0514544		0.00654677	0.213915	0.000860089		1.27364e-05		17.9672		0.456333	19.5917		2.30655	261.175		270.345	17.3768
https://doi.org/10.1002/gj.3756	[0014]	XZ-2	XZ-2-Mnz-08	OROGEN	South Tibet	South Tibetan Detachment System / Himalayan Orogen	Leucogranite		Muscovite granite dyke		Igneous	LAICPMS										113532	5115.69	112.447	0.00285827		0.000101292	0.0202229		0.00249729	0.052946		0.00775737	0.286978	0.000858447		1.3183e-05		18.3993		0.651188	20.3291		2.48548	327.835		299.96	17.3437
https://doi.org/10.1002/gj.3756	[0014]	XZ-2	XZ-2-Mnz-09	OROGEN	South Tibet	South Tibetan Detachment System / Himalayan Orogen	Leucogranite		Muscovite granite dyke		Igneous	LAICPMS										156804	7771.25	159.346	0.00285169		9.96521e-05	0.0233014		0.0027683	0.0627665		0.00887478	0.294139	0.000867713		1.18721e-05		18.357		0.640649	23.3884		2.74692	701.86		305.53	17.5308
https://doi.org/10.1002/gj.3756	[0014]	XZ-2	XZ-2-Mnz-10	OROGEN	South Tibet	South Tibetan Detachment System / Himalayan Orogen	Leucogranite		Muscovite granite dyke		Igneous	LAICPMS										112667	5030.17	110.811	0.00275768		9.35252e-05	0.0239693		0.00289537	0.0651246		0.00978212	0.280761	0.000856338		1.47935e-05		17.7527		0.60132	24.0509		2.87114	788.89		316.183	17.3011
https://doi.org/10.1002/gj.3756	[0014]	XZ-2	XZ-2-Mnz-11	OROGEN	South Tibet	South Tibetan Detachment System / Himalayan Orogen	Leucogranite		Muscovite granite dyke		Igneous	LAICPMS										204096	12779.8	212.093	0.00276344		5.85235e-05	0.0188933		0.00184961	0.0506781		0.00543185	0.216326	0.000865277		1.2236e-05		17.7897		0.37635	19.005		1.84328	233.4		224.05	17.4816
https://doi.org/10.1002/gj.3756	[0014]	XZ-2	XZ-2-Mnz-12	OROGEN	South Tibet	South Tibetan Detachment System / Himalayan Orogen	Leucogranite		Muscovite granite dyke		Igneous	LAICPMS										114340	5585.4	114.096	0.00282419		0.000106141	0.0209348		0.00295642	0.0564957		0.00897889	0.266129	0.000854454		1.30489e-05		18.1802		0.68237	21.0374		2.94038	472.265		357.36	17.2631
https://doi.org/10.1002/gj.3756	[0014]	XZ-2	XZ-2-Mnz-13	OROGEN	South Tibet	South Tibetan Detachment System / Himalayan Orogen	Leucogranite		Muscovite granite dyke		Igneous	LAICPMS										130082	6108.08	127.081	0.00274815		8.6112e-05	0.0203811		0.0024665	0.0555036		0.00774558	0.258923	0.000841735		1.38902e-05		17.6914		0.553675	20.4866		2.45446	431.53		314.772	17.0062
https://doi.org/10.1002/gj.3756	[0014]	XZ-2	XZ-2-Mnz-14	OROGEN	South Tibet	South Tibetan Detachment System / Himalayan Orogen	Leucogranite		Muscovite granite dyke		Igneous	LAICPMS										141205	8545.71	143.626	0.00268343		7.1489e-05	0.0201716		0.00240529	0.0561562		0.00757513	0.223419	0.000848154		1.26981e-05		17.2754		0.459709	20.278		2.39404	457.45		301.812	17.1358
https://doi.org/10.1002/gj.3756	[0014]	XZ-2	XZ-2-Mnz-15	OROGEN	South Tibet	South Tibetan Detachment System / Himalayan Orogen	Leucogranite		Muscovite granite dyke		Igneous	LAICPMS										195507	7127.28	192.646	0.00280544		8.20368e-05	0.020837		0.00257912	0.054247		0.00708365	0.23625	0.000875226		1.21419e-05		18.0597		0.527454	20.9401		2.56538	388.94		296.257	17.6825
https://doi.org/10.1002/gj.3756	[0014]	XZ-2	XZ-2-Mnz-16	OROGEN	South Tibet	South Tibetan Detachment System / Himalayan Orogen	Leucogranite		Muscovite granite dyke		Igneous	LAICPMS										141189	8663.8	145.441	0.00271883		8.3102e-05	0.0215698		0.0024161	0.0585533		0.00725856	0.272873	0.000856882		1.33372e-05		17.5029		0.534341	21.6687		2.40151	550.035		473.115	17.3121
https://doi.org/10.1111/jmg.12535	[0015]	AFG 171	1	OROGEN	Afghanistan	Hindu Kush Orogen / Himalayan Orogen	Metapelite	Amphibolite	garnet-sillimanite migmatite gneiss		Metamorphic	EMPA		3.5	0.9	0.055	205.7		29.3
https://doi.org/10.1111/jmg.12535	[0015]	AFG 171	2	OROGEN	Afghanistan	Hindu Kush Orogen / Himalayan Orogen	Metapelite	Amphibolite	garnet-sillimanite migmatite gneiss		Metamorphic	EMPA		4.03	0.56	0.053	213.9		32.3
https://doi.org/10.1111/jmg.12535	[0015]	AFG 171	3	OROGEN	Afghanistan	Hindu Kush Orogen / Himalayan Orogen	Metapelite	Amphibolite	garnet-sillimanite migmatite gneiss		Metamorphic	EMPA		3.87	0.71	0.047	180.7		30.6
https://doi.org/10.1111/jmg.12535	[0015]	AFG 171	4	OROGEN	Afghanistan	Hindu Kush Orogen / Himalayan Orogen	Metapelite	Amphibolite	garnet-sillimanite migmatite gneiss		Metamorphic	EMPA		10.11	0.52	0.104	210.1		17.3
https://doi.org/10.1111/jmg.12535	[0015]	AFG 171	5	OROGEN	Afghanistan	Hindu Kush Orogen / Himalayan Orogen	Metapelite	Amphibolite	garnet-sillimanite migmatite gneiss		Metamorphic	EMPA		6.65	0.51	0.068	193.6		24.6
https://doi.org/10.1111/jmg.12535	[0015]	AFG 171	6	OROGEN	Afghanistan	Hindu Kush Orogen / Himalayan Orogen	Metapelite	Amphibolite	garnet-sillimanite migmatite gneiss		Metamorphic	EMPA		5.18	0.56	0.061	208.8		26.9
https://doi.org/10.1111/jmg.12535	[0015]	AFG 171	7	OROGEN	Afghanistan	Hindu Kush Orogen / Himalayan Orogen	Metapelite	Amphibolite	garnet-sillimanite migmatite gneiss		Metamorphic	EMPA		5.42	0.46	0.052	179.1		27.1
https://doi.org/10.1111/jmg.12535	[0015]	AFG 171	8	OROGEN	Afghanistan	Hindu Kush Orogen / Himalayan Orogen	Metapelite	Amphibolite	garnet-sillimanite migmatite gneiss		Metamorphic	EMPA		3.59	0.64	0.047	196.9		33.3
https://doi.org/10.1111/jmg.12535	[0015]	AFG 171	9	OROGEN	Afghanistan	Hindu Kush Orogen / Himalayan Orogen	Metapelite	Amphibolite	garnet-sillimanite migmatite gneiss		Metamorphic	EMPA		3.47	0.78	0.051	201.6		31.4
https://doi.org/10.1111/jmg.12535	[0015]	AFG 171	10	OROGEN	Afghanistan	Hindu Kush Orogen / Himalayan Orogen	Metapelite	Amphibolite	garnet-sillimanite migmatite gneiss		Metamorphic	EMPA		3.92	0.67	0.051	201.2		30.9
https://doi.org/10.1111/jmg.12535	[0015]	AFG 171	11	OROGEN	Afghanistan	Hindu Kush Orogen / Himalayan Orogen	Metapelite	Amphibolite	garnet-sillimanite migmatite gneiss		Metamorphic	EMPA		3.72	1.25	0.063	193.3		24.2
https://doi.org/10.1111/jmg.12535	[0015]	AFG 171	12	OROGEN	Afghanistan	Hindu Kush Orogen / Himalayan Orogen	Metapelite	Amphibolite	garnet-sillimanite migmatite gneiss		Metamorphic	EMPA		3.43	0.55	0.041	187.2		36.1
https://doi.org/10.1111/jmg.12535	[0015]	AFG 171	13	OROGEN	Afghanistan	Hindu Kush Orogen / Himalayan Orogen	Metapelite	Amphibolite	garnet-sillimanite migmatite gneiss		Metamorphic	EMPA		7.85	0.59	0.08	193.5		19.2
https://doi.org/10.1111/jmg.12535	[0015]	AFG 171	14	OROGEN	Afghanistan	Hindu Kush Orogen / Himalayan Orogen	Metapelite	Amphibolite	garnet-sillimanite migmatite gneiss		Metamorphic	EMPA		8.81	0.51	0.095	215.0		19.5
https://doi.org/10.1111/jmg.12535	[0015]	AFG 171	15	OROGEN	Afghanistan	Hindu Kush Orogen / Himalayan Orogen	Metapelite	Amphibolite	garnet-sillimanite migmatite gneiss		Metamorphic	EMPA		4.52	1.14	0.07	203.3		22.9
https://doi.org/10.1111/jmg.12535	[0015]	AFG 171	16	OROGEN	Afghanistan	Hindu Kush Orogen / Himalayan Orogen	Metapelite	Amphibolite	garnet-sillimanite migmatite gneiss		Metamorphic	EMPA		8.43	0.52	0.076	179.2		20.3
https://doi.org/10.1111/jmg.12535	[0015]	AFG 171	17	OROGEN	Afghanistan	Hindu Kush Orogen / Himalayan Orogen	Metapelite	Amphibolite	garnet-sillimanite migmatite gneiss		Metamorphic	EMPA		8.02	0.5	0.084	205.8		21.2
https://doi.org/10.1111/jmg.12535	[0015]	AFG 171	18	OROGEN	Afghanistan	Hindu Kush Orogen / Himalayan Orogen	Metapelite	Amphibolite	garnet-sillimanite migmatite gneiss		Metamorphic	EMPA		6.63	0.46	0.068	200.1		23.1
https://doi.org/10.1111/jmg.12535	[0015]	AFG 171	19	OROGEN	Afghanistan	Hindu Kush Orogen / Himalayan Orogen	Metapelite	Amphibolite	garnet-sillimanite migmatite gneiss		Metamorphic	EMPA		3.25	0.48	0.041	200.9		39.1
https://doi.org/10.1111/jmg.12535	[0015]	AFG 171	20	OROGEN	Afghanistan	Hindu Kush Orogen / Himalayan Orogen	Metapelite	Amphibolite	garnet-sillimanite migmatite gneiss		Metamorphic	EMPA		3.92	0.43	0.042	187.9		35.3
https://doi.org/10.1111/jmg.12535	[0015]	AFG 171	21	OROGEN	Afghanistan	Hindu Kush Orogen / Himalayan Orogen	Metapelite	Amphibolite	garnet-sillimanite migmatite gneiss		Metamorphic	EMPA		8.91	0.51	0.087	195.6		19.4
https://doi.org/10.1111/jmg.12535	[0015]	AFG 171	22	OROGEN	Afghanistan	Hindu Kush Orogen / Himalayan Orogen	Metapelite	Amphibolite	garnet-sillimanite migmatite gneiss		Metamorphic	EMPA		6.49	0.56	0.072	206.4		24.7
https://doi.org/10.1111/jmg.12535	[0015]	AFG 171	23	OROGEN	Afghanistan	Hindu Kush Orogen / Himalayan Orogen	Metapelite	Amphibolite	garnet-sillimanite migmatite gneiss		Metamorphic	EMPA		6.85	0.49	0.07	197.6		22.2
https://doi.org/10.1111/jmg.12535	[0015]	AFG 171	24	OROGEN	Afghanistan	Hindu Kush Orogen / Himalayan Orogen	Metapelite	Amphibolite	garnet-sillimanite migmatite gneiss		Metamorphic	EMPA		2.81	0.6	0.041	204.4		39.7
https://doi.org/10.1111/jmg.12535	[0015]	AFG 171	25	OROGEN	Afghanistan	Hindu Kush Orogen / Himalayan Orogen	Metapelite	Amphibolite	garnet-sillimanite migmatite gneiss		Metamorphic	EMPA		3.31	1.34	0.068	210.6		24.6
https://doi.org/10.1111/jmg.12535	[0015]	AFG 171	26	OROGEN	Afghanistan	Hindu Kush Orogen / Himalayan Orogen	Metapelite	Amphibolite	garnet-sillimanite migmatite gneiss		Metamorphic	EMPA		6.65	0.49	0.07	202		22.8
https://doi.org/10.1111/jmg.12535	[0015]	AFG 171	27	OROGEN	Afghanistan	Hindu Kush Orogen / Himalayan Orogen	Metapelite	Amphibolite	garnet-sillimanite migmatite gneiss		Metamorphic	EMPA		5.3	0.49	0.056	194.3		27.3
https://doi.org/10.1111/jmg.12535	[0015]	AFG 171	28	OROGEN	Afghanistan	Hindu Kush Orogen / Himalayan Orogen	Metapelite	Amphibolite	garnet-sillimanite migmatite gneiss		Metamorphic	EMPA		8.69	0.5	0.085	195.9		18.2
https://doi.org/10.1111/jmg.12535	[0015]	AFG 171	29	OROGEN	Afghanistan	Hindu Kush Orogen / Himalayan Orogen	Metapelite	Amphibolite	garnet-sillimanite migmatite gneiss		Metamorphic	EMPA		4.08	0.98	0.037	168.2		36
https://doi.org/10.1111/jmg.12535	[0015]	AFG 171	30	OROGEN	Afghanistan	Hindu Kush Orogen / Himalayan Orogen	Metapelite	Amphibolite	garnet-sillimanite migmatite gneiss		Metamorphic	EMPA		3.94	0.52	0.051	216.7		33.4
https://doi.org/10.1111/jmg.12535	[0015]	AFG 171	31	OROGEN	Afghanistan	Hindu Kush Orogen / Himalayan Orogen	Metapelite	Amphibolite	garnet-sillimanite migmatite gneiss		Metamorphic	EMPA		3.54	0.63	0.041	174.7		33.7
https://doi.org/10.1111/jmg.12535	[0015]	AFG 171	32	OROGEN	Afghanistan	Hindu Kush Orogen / Himalayan Orogen	Metapelite	Amphibolite	garnet-sillimanite migmatite gneiss		Metamorphic	EMPA		4.44	0.55	0.05	191.8		30.1
https://doi.org/10.1111/jmg.12535	[0015]	AFG 171	33	OROGEN	Afghanistan	Hindu Kush Orogen / Himalayan Orogen	Metapelite	Amphibolite	garnet-sillimanite migmatite gneiss		Metamorphic	EMPA		3.94	0.75	0.048	181.5		29.6
https://doi.org/10.1111/jmg.12535	[0015]	AFG 171	34	OROGEN	Afghanistan	Hindu Kush Orogen / Himalayan Orogen	Metapelite	Amphibolite	garnet-sillimanite migmatite gneiss		Metamorphic	EMPA		3.96	0.57	0.041	169.2		32.5
https://doi.org/10.1111/jmg.12535	[0015]	AFG 171	35	OROGEN	Afghanistan	Hindu Kush Orogen / Himalayan Orogen	Metapelite	Amphibolite	garnet-sillimanite migmatite gneiss		Metamorphic	EMPA		3.73	0.76	0.047	182.4		30.4
https://doi.org/10.1111/jmg.12535	[0015]	AFG 171	36	OROGEN	Afghanistan	Hindu Kush Orogen / Himalayan Orogen	Metapelite	Amphibolite	garnet-sillimanite migmatite gneiss		Metamorphic	EMPA		3.79	0.79	0.05	186.3		29.6
https://doi.org/10.1111/jmg.12535	[0015]	AFG 171	37	OROGEN	Afghanistan	Hindu Kush Orogen / Himalayan Orogen	Metapelite	Amphibolite	garnet-sillimanite migmatite gneiss		Metamorphic	EMPA		3.46	0.97	0.048	172.0		28.5
https://doi.org/10.1111/jmg.12535	[0015]	AFG 171	38	OROGEN	Afghanistan	Hindu Kush Orogen / Himalayan Orogen	Metapelite	Amphibolite	garnet-sillimanite migmatite gneiss		Metamorphic	EMPA		4.17	0.86	0.05	170.6		27.1
https://doi.org/10.1007/s12517-020-05541-1	[0016]	LZW	LZW-001	PASSIVE MARGIN	South China	Guangxi	Sandstone		Devonian Quartz sandstone		Detrital	LAICPMS										1028	1788	1594	0.1084		0.0073	0.8663		0.0613	0.0599		0.0027						664		42.4	634		33.4	598		96.3
https://doi.org/10.1007/s12517-020-05541-1	[0016]	LZW	LZW-002	PASSIVE MARGIN	South China	Guangxi	Sandstone		Devonian Quartz sandstone		Detrital	LAICPMS										1408	784	1224	0.0874		0.0028	0.7133		0.0271	0.0597		0.002						540		16.8	547		16	591		72.2
https://doi.org/10.1007/s12517-020-05541-1	[0016]	LZW	LZW-002’	PASSIVE MARGIN	South China	Guangxi	Sandstone		Devonian Quartz sandstone		Detrital	LAICPMS										182	42	18	0.0874		2.36	0.7798		2.43	0.0647		0.6						540		12.2	585		10.9	765		12.6
https://doi.org/10.1007/s12517-020-05541-1	[0016]	LZW	LZW-004	PASSIVE MARGIN	South China	Guangxi	Sandstone		Devonian Quartz sandstone		Detrital	LAICPMS										674	720	1276	0.1381		0.0046	1.2798		0.054	0.0672		0.0021						834		25.9	837		24.1	843		66.7
https://doi.org/10.1007/s12517-020-05541-1	[0016]	LZW	LZW-005	PASSIVE MARGIN	South China	Guangxi	Sandstone		Devonian Quartz sandstone		Detrital	LAICPMS										1785	242	1931	0.1456		0.005	1.3996		0.0589	0.0706		0.0026						876		27.9	889		24.9	946		71.3
https://doi.org/10.1007/s12517-020-05541-1	[0016]	LZW	LZW-006	PASSIVE MARGIN	South China	Guangxi	Sandstone		Devonian Quartz sandstone		Detrital	LAICPMS										880	1386	2402	0.1658		0.0046	1.602		0.0554	0.0701		0.0019						989		25.6	971		21.6	931		55.6
https://doi.org/10.1007/s12517-020-05541-1	[0016]	LZW	LZW-007	PASSIVE MARGIN	South China	Guangxi	Sandstone		Devonian Quartz sandstone		Detrital	LAICPMS										630	725	1518	0.168		0.003	1.6641		0.0499	0.072		0.0021						1001		16.3	995		19	985		59.7
https://doi.org/10.1007/s12517-020-05541-1	[0016]	LZW	LZW-008	PASSIVE MARGIN	South China	Guangxi	Sandstone		Devonian Quartz sandstone		Detrital	LAICPMS										578	709	900	0.1005		0.0017	0.8603		0.0263	0.062		0.0018						617		9.8	630		14.3	676		67.6
https://doi.org/10.1007/s12517-020-05541-1	[0016]	LZW	LZW-009	PASSIVE MARGIN	South China	Guangxi	Sandstone		Devonian Quartz sandstone		Detrital	LAICPMS										1017	699	2117	0.188		0.0082	1.926		0.0891	0.0754		0.0028						1111		44.6	1090		30.9	1080		71.3
https://doi.org/10.1007/s12517-020-05541-1	[0016]	LZW	LZW-010	PASSIVE MARGIN	South China	Guangxi	Sandstone		Devonian Quartz sandstone		Detrital	LAICPMS										633	352	653	0.0951		0.0039	0.8353		0.0438	0.0627		0.0026						585		23.1	617		24.3	698		88.9
https://doi.org/10.1007/s12517-020-05541-1	[0016]	LZW	LZW-011	PASSIVE MARGIN	South China	Guangxi	Sandstone		Devonian Quartz sandstone		Detrital	LAICPMS										741	1468	1428	0.0981		0.0039	0.8216		0.0356	0.0603		0.0019						603		22.7	609		19.8	617		68.5
https://doi.org/10.1007/s12517-020-05541-1	[0016]	LZW	LZW-012	PASSIVE MARGIN	South China	Guangxi	Sandstone		Devonian Quartz sandstone		Detrital	LAICPMS										1367	1086	1337	0.0847		0.0036	0.6854		0.0335	0.0584		0.0021						524		21.4	530		20.2	546		77.8
https://doi.org/10.1007/s12517-020-05541-1	[0016]	LZW	LZW-013	PASSIVE MARGIN	South China	Guangxi	Sandstone		Devonian Quartz sandstone		Detrital	LAICPMS										1264	862	1265	0.09		0.0026	0.7365		0.0327	0.0588		0.0022						555		15.6	560		19.1	561		79.6
https://doi.org/10.1007/s12517-020-05541-1	[0016]	LZW	LZW-014	PASSIVE MARGIN	South China	Guangxi	Sandstone		Devonian Quartz sandstone		Detrital	LAICPMS										944	883	1069	0.0858		0.0021	0.6844		0.0259	0.0578		0.002						531		12.6	529		15.6	520		69.4
https://doi.org/10.1007/s12517-020-05541-1	[0016]	LZW	LZW-015	PASSIVE MARGIN	South China	Guangxi	Sandstone		Devonian Quartz sandstone		Detrital	LAICPMS										170	507	467	0.1022		0.0028	0.8676		0.0354	0.0618		0.0021						627		16.1	634		19.3	666		74.1
https://doi.org/10.1007/s12517-020-05541-1	[0016]	LZW	LZW-016	PASSIVE MARGIN	South China	Guangxi	Sandstone		Devonian Quartz sandstone		Detrital	LAICPMS										486	572	1233	0.1647		0.0059	1.637		0.0798	0.0726		0.0028						983		32.8	985		30.7	1011		76.7
https://doi.org/10.1007/s12517-020-05541-1	[0016]	LZW	LZW-017	PASSIVE MARGIN	South China	Guangxi	Sandstone		Devonian Quartz sandstone		Detrital	LAICPMS										226	52.4	256	0.1416		0.0037	1.5347		0.0875	0.0809		0.0047						854		21.1	944		35.1	1218		115.6
https://doi.org/10.1007/s12517-020-05541-1	[0016]	LZW	LZW-018	PASSIVE MARGIN	South China	Guangxi	Sandstone		Devonian Quartz sandstone		Detrital	LAICPMS										1537	713	1230	0.0897		0.0024	0.7109		0.0309	0.0575		0.0021						554		14.1	545		18.3	522		79.6
https://doi.org/10.1007/s12517-020-05541-1	[0016]	LZW	LZW-019	PASSIVE MARGIN	South China	Guangxi	Sandstone		Devonian Quartz sandstone		Detrital	LAICPMS										1556	774	1418	0.0916		0.0032	0.7367		0.0309	0.0585		0.0017						565		18.7	560		18.1	550		64.8
https://doi.org/10.1007/s12517-020-05541-1	[0016]	LZW	LZW-020	PASSIVE MARGIN	South China	Guangxi	Sandstone		Devonian Quartz sandstone		Detrital	LAICPMS										352	325	386	0.0882		0.0037	0.7269		0.0355	0.0603		0.0021						545		21.7	555		20.9	613		74.1
https://doi.org/10.1007/s12517-020-05541-1	[0016]	LZW	LZW-021	PASSIVE MARGIN	South China	Guangxi	Sandstone		Devonian Quartz sandstone		Detrital	LAICPMS										1011	1416	1417	0.0906		0.0021	0.7373		0.0241	0.0586		0.0015						559		12.3	561		14.1	554		55.5
https://doi.org/10.1007/s12517-020-05541-1	[0016]	LZW	LZW-022	PASSIVE MARGIN	South China	Guangxi	Sandstone		Devonian Quartz sandstone		Detrital	LAICPMS										486	3619	2519	0.1004		0.0037	0.7678		0.0329	0.0558		0.0018						617		21.4	578		18.9	443		75
https://doi.org/10.1007/s12517-020-05541-1	[0016]	LZW	LZW-023	PASSIVE MARGIN	South China	Guangxi	Sandstone		Devonian Quartz sandstone		Detrital	LAICPMS										1103	1040	1345	0.0941		0.0035	0.764		0.0338	0.0589		0.002						580		20.9	576		19.5	565		68.4
https://doi.org/10.1007/s12517-020-05541-1	[0016]	LZW	LZW-024	PASSIVE MARGIN	South China	Guangxi	Sandstone		Devonian Quartz sandstone		Detrital	LAICPMS										713	1445	2254	0.1639		0.0081	1.4582		0.0726	0.0664		0.0025						978		44.9	913		30	820		77.8
https://doi.org/10.1007/s12517-020-05541-1	[0016]	LZW	LZW-025	PASSIVE MARGIN	South China	Guangxi	Sandstone		Devonian Quartz sandstone		Detrital	LAICPMS										1527	511	1183	0.0949		0.0039	0.7575		0.0372	0.0583		0.0022						585		22.8	573		21.5	539		83.3
https://doi.org/10.1007/s12517-020-05541-1	[0016]	LZW	LZW-026	PASSIVE MARGIN	South China	Guangxi	Sandstone		Devonian Quartz sandstone		Detrital	LAICPMS										1417	631	1206	0.0899		0.0043	0.6805		0.0343	0.056		0.0019						555		25.2	527		20.7	454		75.9
https://doi.org/10.1007/s12517-020-05541-1	[0016]	LZW	LZW-027	PASSIVE MARGIN	South China	Guangxi	Sandstone		Devonian Quartz sandstone		Detrital	LAICPMS										608	639	729	0.0974		0.0057	0.7669		0.0445	0.0595		0.0024						599		33.3	578		25.6	583		86.1
https://doi.org/10.1007/s12517-020-05541-1	[0016]	LZW	LZW-028	PASSIVE MARGIN	South China	Guangxi	Sandstone		Devonian Quartz sandstone		Detrital	LAICPMS										1300	472	1112	0.0944		0.0054	0.7803		0.0451	0.0614		0.0023						581		31.8	586		25.7	654		79.6
https://doi.org/10.1007/s12517-020-05541-1	[0016]	LZW	LZW-029	PASSIVE MARGIN	South China	Guangxi	Sandstone		Devonian Quartz sandstone		Detrital	LAICPMS										1093	947	1231	0.1063		0.0073	0.8281		0.057	0.0602		0.0029						651		42.7	613		31.7	609		110.2
https://doi.org/10.1007/s12517-020-05541-1	[0016]	LZW	LZW-030	PASSIVE MARGIN	South China	Guangxi	Sandstone		Devonian Quartz sandstone		Detrital	LAICPMS										1452	81	922	0.0925		0.0027	0.7632		0.0522	0.0606		0.0044						570		15.8	576		30.1	628		155.5
https://doi.org/10.1007/s12517-020-05541-1	[0016]	LZW	LZW-032	PASSIVE MARGIN	South China	Guangxi	Sandstone		Devonian Quartz sandstone		Detrital	LAICPMS										1440	242	981	0.0949		0.0058	0.7729		0.0494	0.0632		0.0031						584		34.2	581		28.3	715		105.5
https://doi.org/10.1007/s12517-020-05541-1	[0016]	LZW	LZW-033	PASSIVE MARGIN	South China	Guangxi	Sandstone		Devonian Quartz sandstone		Detrital	LAICPMS										16	1868	1111	0.1042		0.0066	0.844		0.0576	0.0597		0.0024						639		38.6	621		31.7	594		85.2
https://doi.org/10.1007/s12517-020-05541-1	[0016]	LZW	LZW-034	PASSIVE MARGIN	South China	Guangxi	Sandstone		Devonian Quartz sandstone		Detrital	LAICPMS										764	1121	1217	0.1108		0.0069	0.9743		0.0698	0.0646		0.003						677		39.8	691		35.9	761		100
https://doi.org/10.1007/s12517-020-05541-1	[0016]	LZW	LZW-035	PASSIVE MARGIN	South China	Guangxi	Sandstone		Devonian Quartz sandstone		Detrital	LAICPMS										973	527	1755	0.1954		0.0147	2.0829		0.1562	0.0818		0.0042						1150		79.1	1143		51.4	1240		97.2
https://doi.org/10.1007/s12517-020-05541-1	[0016]	LZW	LZW-036	PASSIVE MARGIN	South China	Guangxi	Sandstone		Devonian Quartz sandstone		Detrital	LAICPMS										357	888	723	0.0975		0.0062	0.7682		0.0522	0.0594		0.0027						600		36.2	579		30	583		100
https://doi.org/10.1007/s12517-020-05541-1	[0016]	LZW	LZW-037	PASSIVE MARGIN	South China	Guangxi	Sandstone		Devonian Quartz sandstone		Detrital	LAICPMS										1696	731	1381	0.0901		0.0046	0.7405		0.043	0.0607		0.0026						556		27.4	563		25.1	628		94.4
https://doi.org/10.1007/s12517-020-05541-1	[0016]	LZW	LZW-038	PASSIVE MARGIN	South China	Guangxi	Sandstone		Devonian Quartz sandstone		Detrital	LAICPMS										1046	245	1179	0.1502		0.0087	1.4196		0.0895	0.0714		0.0035						902		48.5	897		37.6	969		100
https://doi.org/10.1007/s12517-020-05541-1	[0016]	LZW	LZW-039	PASSIVE MARGIN	South China	Guangxi	Sandstone		Devonian Quartz sandstone		Detrital	LAICPMS										1157	62.4	987	0.1588		0.0084	1.5993		0.1161	0.0737		0.0043						950		46.6	970		45.4	1035		118.2
https://doi.org/10.1007/s12517-020-05541-1	[0016]	LZW	LZW-040	PASSIVE MARGIN	South China	Guangxi	Sandstone		Devonian Quartz sandstone		Detrital	LAICPMS										1093	380	890	0.0992		0.0063	0.7937		0.0542	0.0598		0.0029						610		36.9	593		30.7	598		105.5
https://doi.org/10.1007/s12517-020-05541-1	[0016]	LZW	LZW-041	PASSIVE MARGIN	South China	Guangxi	Sandstone		Devonian Quartz sandstone		Detrital	LAICPMS										522	620	654	0.1007		0.0072	0.7819		0.0603	0.0588		0.003						618		42.2	587		34.3	567		145.4
https://doi.org/10.1007/s12517-020-05541-1	[0016]	LZW	LZW-042	PASSIVE MARGIN	South China	Guangxi	Sandstone		Devonian Quartz sandstone		Detrital	LAICPMS										808	315	791	0.1191		0.0092	0.9742		0.0767	0.0634		0.0034						726		52.8	691		39.5	720		113
https://doi.org/10.1007/s12517-020-05541-1	[0016]	LZW	LZW-043	PASSIVE MARGIN	South China	Guangxi	Sandstone		Devonian Quartz sandstone		Detrital	LAICPMS										848	668	1115	0.1102		0.0057	0.9494		0.0561	0.0634		0.0025						674		33	678		29.2	720		85.2
https://doi.org/10.1007/s12517-020-05541-1	[0016]	LZW	LZW-044	PASSIVE MARGIN	South China	Guangxi	Sandstone		Devonian Quartz sandstone		Detrital	LAICPMS										1620	1158	2491	0.1291		0.005	1.1549		0.0472	0.0658		0.0023						783		28.8	780		22.2	1200		74.8
https://doi.org/10.1007/s12517-020-05541-1	[0016]	LZW	LZW-045	PASSIVE MARGIN	South China	Guangxi	Sandstone		Devonian Quartz sandstone		Detrital	LAICPMS										1357	531	1131	0.0792		0.0028	0.6311		0.0298	0.0577		0.0023						492		16.8	497		18.6	517		88.9
https://doi.org/10.1007/s12517-020-05541-1	[0016]	LZW	LZW-046	PASSIVE MARGIN	South China	Guangxi	Sandstone		Devonian Quartz sandstone		Detrital	LAICPMS										14	59	46	0.1138		0.0082	0.872		0.0788	0.0622		0.0052						695		47.4	637		42.7	680		181.5
https://doi.org/10.1007/s12517-020-05541-1	[0016]	LZW	LZW-047	PASSIVE MARGIN	South China	Guangxi	Sandstone		Devonian Quartz sandstone		Detrital	LAICPMS										1333	1337	1615	0.0953		0.005	0.7496		0.0395	0.0589		0.0026						587		29.7	568		22.9	561		94.4
https://doi.org/10.1007/s12517-020-05541-1	[0016]	LZW	LZW-048	PASSIVE MARGIN	South China	Guangxi	Sandstone		Devonian Quartz sandstone		Detrital	LAICPMS										1132	502	1111	0.1024		0.0037	0.8663		0.0412	0.0607		0.0023						628		21.8	634		22.4	629		81.5
https://doi.org/10.1007/s12517-020-05541-1	[0016]	LZW	LZW-049	PASSIVE MARGIN	South China	Guangxi	Sandstone		Devonian Quartz sandstone		Detrital	LAICPMS										513	324	494	0.0882		0.0024	0.7		0.0287	0.0567		0.002						545		14.3	539		17.2	480		84.3
https://doi.org/10.1007/s12517-020-05541-1	[0016]	LZW	LZW-050	PASSIVE MARGIN	South China	Guangxi	Sandstone		Devonian Quartz sandstone		Detrital	LAICPMS										465	862	803	0.0871		0.0031	0.7167		0.0321	0.0591		0.002						539		18.5	549		19	572		74.1
https://doi.org/10.1007/s12517-020-05541-1	[0016]	LZW	LZW-050’	PASSIVE MARGIN	South China	Guangxi	Sandstone		Devonian Quartz sandstone		Detrital	LAICPMS										54	231	23	0.0872		2.36	0.7116		2.43	0.0591		0.61						539		12.2	545		10.3	573		13.2
https://doi.org/10.1007/s12517-020-05541-1	[0016]	LZW	LZW-051	PASSIVE MARGIN	South China	Guangxi	Sandstone		Devonian Quartz sandstone		Detrital	LAICPMS										1074	508	1674	0.1524		0.0055	1.4932		0.0635	0.0716		0.0025						914		30.6	928		25.9	976		76.9
https://doi.org/10.1007/s12517-020-05541-1	[0016]	LZW	LZW-052	PASSIVE MARGIN	South China	Guangxi	Sandstone		Devonian Quartz sandstone		Detrital	LAICPMS										1412	604	1120	0.0838		0.0036	0.6518		0.0319	0.0571		0.0022						519		21.1	510		19.6	494		83.3
https://doi.org/10.1007/s12517-020-05541-1	[0016]	LZW	LZW-053	PASSIVE MARGIN	South China	Guangxi	Sandstone		Devonian Quartz sandstone		Detrital	LAICPMS										1418	560	1902	0.1401		0.0038	1.4864		0.054	0.0772		0.0023						845		21.2	925		22.1	1126		59.7
https://doi.org/10.1007/s12517-020-05541-1	[0016]	LZW	LZW-054	PASSIVE MARGIN	South China	Guangxi	Sandstone		Devonian Quartz sandstone		Detrital	LAICPMS										1612	345	2098	0.1608		0.005	1.601		0.0633	0.0725		0.0024						961		27.9	971		24.7	1011		65.9
https://doi.org/10.1007/s12517-020-05541-1	[0016]	LZW	LZW-055	PASSIVE MARGIN	South China	Guangxi	Sandstone		Devonian Quartz sandstone		Detrital	LAICPMS										1702	634	1354	0.0874		0.0034	0.7722		0.032	0.0649		0.0021						540		19.9	581		18.4	772		68.5
https://doi.org/10.1007/s12517-020-05541-1	[0016]	LZW	LZW-056	PASSIVE MARGIN	South China	Guangxi	Sandstone		Devonian Quartz sandstone		Detrital	LAICPMS										1346	86.3	1554	0.1601		0.0047	1.7021		0.075	0.0778		0.0032						957		26.3	1009		28.2	1143		82.3
https://doi.org/10.1007/s12517-020-05541-1	[0016]	LZW	LZW-058	PASSIVE MARGIN	South China	Guangxi	Sandstone		Devonian Quartz sandstone		Detrital	LAICPMS										1099	1292	1420	0.0975		0.0044	0.7918		0.0364	0.0593		0.002						600		26	592		20.6	576		75
https://doi.org/10.1007/s12517-020-05541-1	[0016]	LZW	LZW-059	PASSIVE MARGIN	South China	Guangxi	Sandstone		Devonian Quartz sandstone		Detrital	LAICPMS										1652	809	2290	0.1412		0.0089	1.4241		0.0848	0.0778		0.0037						851		50.3	899		35.5	1143		95.5
https://doi.org/10.1007/s12517-020-05541-1	[0016]	LZW	LZW-060	PASSIVE MARGIN	South China	Guangxi	Sandstone		Devonian Quartz sandstone		Detrital	LAICPMS										1164	129	1366	0.1629		0.0063	1.7473		0.0925	0.0771		0.0034						973		34.8	1026		34.2	1124		88.1
https://doi.org/10.1007/s12517-020-05541-1	[0016]	LZW	LZW-061	PASSIVE MARGIN	South China	Guangxi	Sandstone		Devonian Quartz sandstone		Detrital	LAICPMS										1227	557	1046	0.0929		0.0052	0.7454		0.0466	0.0603		0.003						573		30.5	566		27.1	617		109.2
https://doi.org/10.1007/s12517-020-05541-1	[0016]	LZW	LZW-062	PASSIVE MARGIN	South China	Guangxi	Sandstone		Devonian Quartz sandstone		Detrital	LAICPMS										10857	5124	2738	0.0761		0.001	0.6295		0.0163	0.0591		0.0015						473		5.7	495		10.1	572		58.3
https://doi.org/10.1007/s12517-020-05541-1	[0016]	LZW	LZW-063	PASSIVE MARGIN	South China	Guangxi	Sandstone		Devonian Quartz sandstone		Detrital	LAICPMS										59736	3223	1654	0.0785		0.0009	0.6411		0.0152	0.0584		0.0013						487		5.4	502		9.4	546		49.9
https://doi.org/10.1007/s12517-020-05541-1	[0016]	LZW	LZW-064	PASSIVE MARGIN	South China	Guangxi	Sandstone		Devonian Quartz sandstone		Detrital	LAICPMS										10854	3182	5174	0.2055		0.014	2.2622		0.1379	0.082		0.0019						1204		74.9	1200		42.9	1255		50.9
https://doi.org/10.1007/s12517-020-05541-1	[0016]	LZW	LZW-065	PASSIVE MARGIN	South China	Guangxi	Sandstone		Devonian Quartz sandstone		Detrital	LAICPMS										83480	4753	4150	0.1526		0.0015	1.5146		0.0303	0.0713		0.0013						915		8.6	936		12.2	964		41.6
https://doi.org/10.1007/s12517-020-05541-1	[0016]	LZW	LZW-066	PASSIVE MARGIN	South China	Guangxi	Sandstone		Devonian Quartz sandstone		Detrital	LAICPMS										68257	10060	2666	0.0894		0.0009	0.7351		0.0149	0.0591		0.0011						552		5.3	559		8.7	568		38.8
https://doi.org/10.1007/s12517-020-05541-1	[0016]	LZW	LZW-067	PASSIVE MARGIN	South China	Guangxi	Sandstone		Devonian Quartz sandstone		Detrital	LAICPMS										12703	6660	3459	0.1406		0.0096	1.2522		0.0983	0.0623		0.0014						848		54.5	824		44.3	683		48.9
https://doi.org/10.1007/s12517-020-05541-1	[0016]	LZW	LZW-068	PASSIVE MARGIN	South China	Guangxi	Sandstone		Devonian Quartz sandstone		Detrital	LAICPMS										86334	8658	2709	0.0846		0.0009	0.7531		0.0205	0.0641		0.0016						523		5.5	570		11.8	746		49
https://doi.org/10.1007/s12517-020-05541-1	[0016]	LZW	LZW-069	PASSIVE MARGIN	South China	Guangxi	Sandstone		Devonian Quartz sandstone		Detrital	LAICPMS										15791	5409	1086	0.1039		0.0014	0.8895		0.021	0.0616		0.0012						637		8	646		11.2	661		40.7
https://doi.org/10.1007/s12517-020-05541-1	[0016]	LZW	LZW-070	PASSIVE MARGIN	South China	Guangxi	Sandstone		Devonian Quartz sandstone		Detrital	LAICPMS										66993	4468	2186	0.0996		0.001	0.8546		0.0166	0.0618		0.0011						612		5.7	627		9.1	733		37
https://doi.org/10.1007/s12517-020-05541-1	[0016]	LZW	LZW-071	PASSIVE MARGIN	South China	Guangxi	Sandstone		Devonian Quartz sandstone		Detrital	LAICPMS										94499	12565	3417	0.0992		0.0023	0.8409		0.0259	0.061		0.0011						609		13.4	619		14.2	638		38.8
https://doi.org/10.1007/s12517-020-05541-1	[0016]	LZW	LZW-072	PASSIVE MARGIN	South China	Guangxi	Sandstone		Devonian Quartz sandstone		Detrital	LAICPMS										14429	8728	3929	0.0864		0.0008	0.7057		0.0128	0.0588		0.001						534		4.7	542		7.6	561		35.1
https://doi.org/10.1007/s12517-020-05541-1	[0016]	LZW	LZW-073	PASSIVE MARGIN	South China	Guangxi	Sandstone		Devonian Quartz sandstone		Detrital	LAICPMS										52070	2045	1744	0.1088		0.001	0.9699		0.0185	0.0642		0.0011						665		5.8	688		9.5	750		31.3
https://doi.org/10.1007/s12517-020-05541-1	[0016]	LZW	LZW-074	PASSIVE MARGIN	South China	Guangxi	Sandstone		Devonian Quartz sandstone		Detrital	LAICPMS										53919	4822	1774	0.0865		0.0008	0.7159		0.0138	0.0596		0.001						534		4.7	548		8.1	590		37
https://doi.org/10.1007/s12517-020-05541-1	[0016]	LZW	LZW-075	PASSIVE MARGIN	South China	Guangxi	Sandstone		Devonian Quartz sandstone		Detrital	LAICPMS										10728	13245	3681	0.0922		0.0015	0.7561		0.0169	0.0593		0.0011						568		8.9	571		9.7	588		40.7
https://doi.org/10.1007/s12517-020-05541-1	[0016]	LZW	LZW-076	PASSIVE MARGIN	South China	Guangxi	Sandstone		Devonian Quartz sandstone		Detrital	LAICPMS										97794	12237	3538	0.1186		0.0037	1.0495		0.0388	0.0636		0.0013						722		21.2	728		19.2	727		40.7
https://doi.org/10.1007/s12517-020-05541-1	[0016]	LZW	LZW-077	PASSIVE MARGIN	South China	Guangxi	Sandstone		Devonian Quartz sandstone		Detrital	LAICPMS										950	8730	870	0.084		0.002	0.8014		0.03	0.0662		0.002						602		37.2	583		18	816		82.1
https://doi.org/10.1007/s12517-020-05541-1	[0016]	LZW	LZW-078	PASSIVE MARGIN	South China	Guangxi	Sandstone		Devonian Quartz sandstone		Detrital	LAICPMS										4220	9930	1960	0.143		0.009	1.5054		0.19	0.072		0.01						863		52	915		78.1	1009		89
https://doi.org/10.1007/s12517-020-05541-1	[0016]	LZW	LZW-079	PASSIVE MARGIN	South China	Guangxi	Sandstone		Devonian Quartz sandstone		Detrital	LAICPMS										88498	5237	4069	0.1386		0.0015	1.3503		0.033	0.07		0.0016						836		8.4	867		14.2	929		48.1
https://doi.org/10.1007/s12517-020-05541-1	[0016]	LZW	LZW-081	PASSIVE MARGIN	South China	Guangxi	Sandstone		Devonian Quartz sandstone		Detrital	LAICPMS										57565	5162	1809	0.1449		0.0084	1.2835		0.1049	0.0637		0.0031						872		47.4	838		46.6	731		102.9
https://doi.org/10.1007/s12517-020-05541-1	[0016]	LZW	LZW-082	PASSIVE MARGIN	South China	Guangxi	Sandstone		Devonian Quartz sandstone		Detrital	LAICPMS										2900	6520	1210	0.1353		0.0043	1.3253		0.0532	0.0662		0.0223						799		32	817		23.3	809		81.1
https://doi.org/10.1007/s12517-020-05541-1	[0016]	LZW	LZW-084	PASSIVE MARGIN	South China	Guangxi	Sandstone		Devonian Quartz sandstone		Detrital	LAICPMS										1103	1040	1345	0.1127		0.0011	0.9822		0.0167	0.0628		0.0009						688		6.2	694		8.6	701		-0.9
https://doi.org/10.1007/s12517-020-05541-1	[0016]	LZW	LZW-085	PASSIVE MARGIN	South China	Guangxi	Sandstone		Devonian Quartz sandstone		Detrital	LAICPMS										12787	5018	3325	0.0922		0.001	0.7931		0.015	0.0619		0.001						568		5.7	592		8.5	733		33.3
https://doi.org/10.1007/s12517-020-05541-1	[0016]	LZW	LZW-086	PASSIVE MARGIN	South China	Guangxi	Sandstone		Devonian Quartz sandstone		Detrital	LAICPMS										2750	3830	840	0.146		0.0032	1.6852		0.0721	0.0782		0.003						881		18.8	973		29.3	1169		65
https://doi.org/10.1007/s12517-020-05541-1	[0016]	LZW	LZW-087	PASSIVE MARGIN	South China	Guangxi	Sandstone		Devonian Quartz sandstone		Detrital	LAICPMS										10243	4299	2549	0.0852		0.001	0.6881		0.0129	0.0581		0.001						527		5.1	531		7.8	531		37
https://doi.org/10.1007/s12517-020-05541-1	[0016]	LZW	LZW-088	PASSIVE MARGIN	South China	Guangxi	Sandstone		Devonian Quartz sandstone		Detrital	LAICPMS										10191	10376	3414	0.0939		0.001	0.855		0.0174	0.0654		0.0011						578		5.6	627		9.5	787		41.7
https://doi.org/10.1007/s12517-020-05541-1	[0016]	LZW	LZW-089	PASSIVE MARGIN	South China	Guangxi	Sandstone		Devonian Quartz sandstone		Detrital	LAICPMS										61178	1581	1616	0.0875		0.001	0.7952		0.0182	0.0655		0.0013						541		5.8	594		10.3	790		42.6
https://doi.org/10.1007/s12517-020-05541-1	[0016]	LZW	LZW-090	PASSIVE MARGIN	South China	Guangxi	Sandstone		Devonian Quartz sandstone		Detrital	LAICPMS										4290	5450	1270	0.154		0.0031	1.5601		0.0712	0.071		0.003						924		16.9	974		27	983		94.3
https://doi.org/10.1007/s12517-020-05541-1	[0016]	LZW	LZW- 091	PASSIVE MARGIN	South China	Guangxi	Sandstone		Devonian Quartz sandstone		Detrital	LAICPMS										59172	8170	2279	0.0947		0.001	0.8023		0.0181	0.0608		0.0012						583		5.6	598		10.1	631		44.4
https://doi.org/10.1007/s12517-020-05541-1	[0016]	LZW	LZW-092	PASSIVE MARGIN	South China	Guangxi	Sandstone		Devonian Quartz sandstone		Detrital	LAICPMS										81769	11772	3121	0.1104		0.0054	0.949		0.0563	0.0606		0.0012						675		31.4	677		29.3	627		74.9
https://doi.org/10.1007/s12517-020-05541-1	[0016]	LZW	LZW-093	PASSIVE MARGIN	South China	Guangxi	Sandstone		Devonian Quartz sandstone		Detrital	LAICPMS										81766	4277	2284	0.0897		0.0009	0.7514		0.0163	0.0603		0.0012						553		5.3	569		9.4	612		40.7
https://doi.org/10.1007/s12517-020-05541-1	[0016]	LZW	LZW-094	PASSIVE MARGIN	South China	Guangxi	Sandstone		Devonian Quartz sandstone		Detrital	LAICPMS										12044	10255	3682	0.091		0.001	0.7414		0.0173	0.0586		0.0012						561		6.1	563		10	553		44.4
https://doi.org/10.1007/s12517-020-05541-1	[0016]	LZW	LZW-095	PASSIVE MARGIN	South China	Guangxi	Sandstone		Devonian Quartz sandstone		Detrital	LAICPMS										70470	7744	9550	0.4841		0.0282	10.834		0.6003	0.1661		0.0036						2544		122.5	2509		51.5	2518		35.3
https://doi.org/10.1007/s12517-020-05541-1	[0016]	LZW	LZW-096	PASSIVE MARGIN	South China	Guangxi	Sandstone		Devonian Quartz sandstone		Detrital	LAICPMS										45157	6047	2043	0.1212		0.0033	1.0955		0.0394	0.0649		0.0015						737		19	751		19	772		47
https://doi.org/10.1007/s12517-020-05541-1	[0016]	LZW	LZW-097	PASSIVE MARGIN	South China	Guangxi	Sandstone		Devonian Quartz sandstone		Detrital	LAICPMS										10104	4967	2634	0.0811		0.0009	0.6809		0.0171	0.0605		0.0013						502		5.5	527		10.3	621		44.4
https://doi.org/10.1007/s12517-020-05541-1	[0016]	LZW	LZW-098	PASSIVE MARGIN	South China	Guangxi	Sandstone		Devonian Quartz sandstone		Detrital	LAICPMS										12912	1165	5223	0.1399		0.0015	1.374		0.0304	0.071		0.0014						844		8.6	877		13	961		39.6
https://doi.org/10.1007/s12517-020-05541-1	[0016]	LZW	LZW-099	PASSIVE MARGIN	South China	Guangxi	Sandstone		Devonian Quartz sandstone		Detrital	LAICPMS										79535	6599	3798	0.2257		0.0128	2.676		0.1807	0.0842		0.002						1312		67.2	1321		49.9	1298		44.4
https://doi.org/10.1007/s12517-020-05541-1	[0016]	LZW	LZW-100	PASSIVE MARGIN	South China	Guangxi	Sandstone		Devonian Quartz sandstone		Detrital	LAICPMS										16790	35500	3730	0.0791		0.001	0.6012		0.0201	0.0564		0.001						495		10	498		15.7	500		75
https://doi.org/10.1007/s12517-020-05541-1	[0016]	LZW	LZW-101	PASSIVE MARGIN	South China	Guangxi	Sandstone		Devonian Quartz sandstone		Detrital	LAICPMS										54673	9950	4723	0.2326		0.0119	2.8655		0.3131	0.093		0.0105						1348		62.1	1372		82.2	1487		221.3
https://doi.org/10.1007/s12517-020-05541-1	[0016]	LZW	LZW-102	PASSIVE MARGIN	South China	Guangxi	Sandstone		Devonian Quartz sandstone		Detrital	LAICPMS										90261	6039	2488	0.0757		0.0008	0.6414		0.0107	0.0614		0.0008						470		4.6	503		6.6	653		24.9
https://doi.org/10.1007/s12517-020-05541-1	[0016]	LZW	LZW-103	PASSIVE MARGIN	South China	Guangxi	Sandstone		Devonian Quartz sandstone		Detrital	LAICPMS										82655	4223	3965	0.1443		0.0016	1.3896		0.0251	0.0696		0.0009						868		8.7	884		10.6	916		21.2
https://doi.org/10.1007/s12517-020-05541-1	[0016]	LZW	LZW-104	PASSIVE MARGIN	South China	Guangxi	Sandstone		Devonian Quartz sandstone		Detrital	LAICPMS										59933	8193	2257	0.098		0.0014	0.9196		0.0321	0.0665		0.0014						602		8.1	662		16.9	820		44.4
https://doi.org/10.1007/s12517-020-05541-1	[0016]	LZW	LZW-105	PASSIVE MARGIN	South China	Guangxi	Sandstone		Devonian Quartz sandstone		Detrital	LAICPMS										68293	3490	1965	0.0842		0.0011	0.6936		0.0147	0.0595		0.001						521		6.3	534		8.8	583		37
https://doi.org/10.1007/s12517-020-05541-1	[0016]	LZW	LZW-107	PASSIVE MARGIN	South China	Guangxi	Sandstone		Devonian Quartz sandstone		Detrital	LAICPMS										39618	8823	2177	0.1051		0.0012	0.9143		0.0206	0.0626		0.0011						644		7.1	659		10.9	694		38.8
https://doi.org/10.1007/s12517-020-05541-1	[0016]	LZW	LZW-108	PASSIVE MARGIN	South China	Guangxi	Sandstone		Devonian Quartz sandstone		Detrital	LAICPMS										74788	5340	2349	0.0953		0.001	0.8215		0.0175	0.0621		0.0011						586		5.8	608		9.7	675		38.8
https://doi.org/10.1007/s12517-020-05541-1	[0016]	LZW	LZW-109	PASSIVE MARGIN	South China	Guangxi	Sandstone		Devonian Quartz sandstone		Detrital	LAICPMS										81681	6063	4088	0.1567		0.0016	1.5649		0.0302	0.0719		0.0012						938		9	956		11.9	984		31.4
https://doi.org/10.1007/s12517-020-05541-1	[0016]	LZW	LZW-110	PASSIVE MARGIN	South China	Guangxi	Sandstone		Devonian Quartz sandstone		Detrital	LAICPMS										10400	7380	1740	0.121		0.0023	1.2087		0.0405	0.0692		0.0021						738		13.3	781		20.4	900		82
https://doi.org/10.1007/s12517-020-05541-1	[0016]	LZW	LZW-111	PASSIVE MARGIN	South China	Guangxi	Sandstone		Devonian Quartz sandstone		Detrital	LAICPMS										11507	3587	2780	0.0817		0.0009	0.7115		0.0145	0.0629		0.0012						506		5.2	545		8.5	705		40.7
https://doi.org/10.1007/s12517-020-05541-1	[0016]	LZW	LZW-111’	PASSIVE MARGIN	South China	Guangxi	Sandstone		Devonian Quartz sandstone		Detrital	LAICPMS										45	192	18	0.082		2.36	0.6682		2.44	0.0591		0.0591						507		11.5	519		10	571		13.6
https://doi.org/10.1007/s12517-020-05541-1	[0016]	LZW	LZW-112	PASSIVE MARGIN	South China	Guangxi	Sandstone		Devonian Quartz sandstone		Detrital	LAICPMS										10667	6738	5034	0.1408		0.0016	1.4287		0.029	0.0731		0.0013						849		9	900		12.1	1016		34.1
https://doi.org/10.1007/s12517-020-05541-1	[0016]	LZW	LZW-113	PASSIVE MARGIN	South China	Guangxi	Sandstone		Devonian Quartz sandstone		Detrital	LAICPMS										17910	6780	2350	0.123		0.0023	1.2792		0.056	0.068		0.002						750		11.1	793		21.3	895		81
https://doi.org/10.1007/s12517-020-05541-1	[0016]	LZW	LZW-114	PASSIVE MARGIN	South China	Guangxi	Sandstone		Devonian Quartz sandstone		Detrital	LAICPMS										13259	9686	3781	0.0836		0.0008	0.6702		0.0156	0.0578		0.0012						517		5	520		9.5	524		46.3
https://doi.org/10.1007/s12517-020-05541-1	[0016]	LZW	LZW-115	PASSIVE MARGIN	South China	Guangxi	Sandstone		Devonian Quartz sandstone		Detrital	LAICPMS										75455	1889	2136	0.0981		0.001	0.8177		0.0217	0.0601		0.0015						603		6.1	606		12.1	605		51.8
https://doi.org/10.1007/s12517-020-05541-1	[0016]	LZW	LZW-116	PASSIVE MARGIN	South China	Guangxi	Sandstone		Devonian Quartz sandstone		Detrital	LAICPMS										66852	6873	2481	0.0988		0.001	0.8322		0.0216	0.0607		0.0014						607		6	614		12	631		45.4
https://doi.org/10.1007/s12517-020-05541-1	[0016]	LZW	LZW-117	PASSIVE MARGIN	South China	Guangxi	Sandstone		Devonian Quartz sandstone		Detrital	LAICPMS										64428	6977	2143	0.0864		0.0009	0.6927		0.0165	0.0579		0.0012						533		5.2	534		9.9	524		46.2
https://doi.org/10.1007/s12517-020-05541-1	[0016]	LZW	LZW-118	PASSIVE MARGIN	South China	Guangxi	Sandstone		Devonian Quartz sandstone		Detrital	LAICPMS										53413	9923	2291	0.0902		0.0009	0.752		0.0155	0.0601		0.0011						556		5.2	569		9	605		38.9
https://doi.org/10.1007/s12517-020-05541-1	[0016]	LZW	LZW-119	PASSIVE MARGIN	South China	Guangxi	Sandstone		Devonian Quartz sandstone		Detrital	LAICPMS										76549	4106	3637	0.1508		0.0016	1.5233		0.0337	0.0727		0.0014						905		8.7	939		13.6	1005		44.6
https://doi.org/10.1007/s12517-020-05541-1	[0016]	LZW	LZW-120	PASSIVE MARGIN	South China	Guangxi	Sandstone		Devonian Quartz sandstone		Detrital	LAICPMS										10656	4792	2859	0.0865		0.0009	0.7429		0.0179	0.0618		0.0013						534		5.6	564		10.4	733		50.9
https://doi.org/10.1007/s12517-020-05541-1	[0016]	LZW	LZW-121	PASSIVE MARGIN	South China	Guangxi	Sandstone		Devonian Quartz sandstone		Detrital	LAICPMS										10400	7380	2990	0,1213		0.0026	1.23		0.0402	0.068		0.002						738		13.8	781		20.2	900		82.3
https://doi.org/10.1007/s12517-020-05541-1	[0016]	LZW	LZW-122	PASSIVE MARGIN	South China	Guangxi	Sandstone		Devonian Quartz sandstone		Detrital	LAICPMS										98774	2463	1087	0.4816		0.0264	12.225		0.7936	0.1818		0.0041						2534		114.9	2621		60.9	2669		37.3
https://doi.org/10.1007/s12517-020-05541-1	[0016]	LZW	LZW-123	PASSIVE MARGIN	South China	Guangxi	Sandstone		Devonian Quartz sandstone		Detrital	LAICPMS										11634	3491	3933	0.2695		0.0291	3.3937		0.4065	0.0931		0.0054						1538		147.9	1502		93.9	1500		110.6
https://doi.org/10.1007/s12517-020-05541-1	[0016]	LZW	LZW-124	PASSIVE MARGIN	South China	Guangxi	Sandstone		Devonian Quartz sandstone		Detrital	LAICPMS										8537	1503	314	0.3242		0.0247	4.967		0.4567	0.1206		0.0065						1810		120.3	1813		77.7	1965		97.6
https://doi.org/10.1007/s12517-020-05541-1	[0016]	LZW	LZW-125	PASSIVE MARGIN	South China	Guangxi	Sandstone		Devonian Quartz sandstone		Detrital	LAICPMS										55624	3636	1647	0.106		0.0046	0.8472		0.0484	0.0571		0.0014						649		26.9	623		26.5	498		53.6
https://doi.org/10.1007/s12517-020-05541-1	[0016]	LZW	LZW-127	PASSIVE MARGIN	South China	Guangxi	Sandstone		Devonian Quartz sandstone		Detrital	LAICPMS										11088	5017	2792	0.0721		0.0016	0.5782		0.017	0.0651		0.0035						448		9.8	463		10.9	788		112.9
https://doi.org/10.1007/s12517-020-05541-1	[0016]	LZW	LZW-128	PASSIVE MARGIN	South China	Guangxi	Sandstone		Devonian Quartz sandstone		Detrital	LAICPMS										12402	3896	5251	0.1543		0.0014	1.5143		0.0244	0.0708		0.0009						925		8	936		9.8	953		31.6
https://doi.org/10.1007/s12517-020-05541-1	[0016]	LZW	LZW-129	PASSIVE MARGIN	South China	Guangxi	Sandstone		Devonian Quartz sandstone		Detrital	LAICPMS										92722	5676	4527	0.1575		0.0014	1.5423		0.024	0.0706		0.0009						943		7.9	947		9.6	946		25.9
https://doi.org/10.1007/s12517-020-05541-1	[0016]	LZW	LZW-130	PASSIVE MARGIN	South China	Guangxi	Sandstone		Devonian Quartz sandstone		Detrital	LAICPMS										14910	23980	5180	0.1754		0.0021	1.7537		500	0.072		0.001						1042		13.6	1033		17.3	990		21.5
https://doi.org/10.1007/s12517-020-05541-1	[0016]	LZW	LZW-131	PASSIVE MARGIN	South China	Guangxi	Sandstone		Devonian Quartz sandstone		Detrital	LAICPMS										73527	2983	1909	0.0872		0.0008	0.7319		0.0123	0.0606		0.0009						538		4.8	557		7.5	633		33.3
https://doi.org/10.1007/s12517-020-05541-1	[0016]	LZW	LZW-132	PASSIVE MARGIN	South China	Guangxi	Sandstone		Devonian Quartz sandstone		Detrital	LAICPMS										72438	2914	1901	0.0901		0.0008	0.7398		0.0127	0.0592		0.0009						556		4.9	562		7.4	572		31.4
https://doi.org/10.1007/s12517-020-05541-1	[0016]	LZW	LZW-133	PASSIVE MARGIN	South China	Guangxi	Sandstone		Devonian Quartz sandstone		Detrital	LAICPMS										14641	11546	4293	0.0838		0.0009	0.6912		0.0164	0.0594		0.0013						518		5.7	533		9.8	583		13.9
https://doi.org/10.1007/s12517-020-05541-1	[0016]	LZW	LZW-133’	PASSIVE MARGIN	South China	Guangxi	Sandstone		Devonian Quartz sandstone		Detrital	LAICPMS										31	132	12	0.0833		2.35	0.6568		2.46	0.0571		0.7						516		11.7	512		9.9	498		15.3
https://doi.org/10.1007/s12517-020-05541-1	[0016]	LZW	LZW-134	PASSIVE MARGIN	South China	Guangxi	Sandstone		Devonian Quartz sandstone		Detrital	LAICPMS										85438	2742	2145	0.0805		0..0009	0.7084		0.0167	0.063		0.0013						499		5.4	543		9.9	709		42.6
https://doi.org/10.1007/s12517-020-05541-1	[0016]	LZW	LZW-135	PASSIVE MARGIN	South China	Guangxi	Sandstone		Devonian Quartz sandstone		Detrital	LAICPMS										2072	1152	199	0.0792		0.0013	0.62341		0.0213	0.0572		0.002						473		14	497		15.2	498		88.3
https://doi.org/10.1007/s12517-020-05541-1	[0016]	LZW	LZW-135’	PASSIVE MARGIN	South China	Guangxi	Sandstone		Devonian Quartz sandstone		Detrital	LAICPMS										20	100	10	0.0721		4.7	2.3656		16.13	0.2379		15.43						459		22	449		20.4	1232		122.2
https://doi.org/10.1007/s12517-020-05541-1	[0016]	LZW	LZW-136	PASSIVE MARGIN	South China	Guangxi	Sandstone		Devonian Quartz sandstone		Detrital	LAICPMS										67402	2894	2157	0.1007		0.001	0.8663		0.0183	0.0616		0.0012						618		6.2	633		10	661		40.7
https://doi.org/10.1007/s12517-020-05541-1	[0016]	LZW	LZW-137	PASSIVE MARGIN	South China	Guangxi	Sandstone		Devonian Quartz sandstone		Detrital	LAICPMS										92762	2767	4053	0.1467		0.0016	1.4635		0.0319	0.0715		0.0015						882		9.1	915		13.2	972		41.3
https://doi.org/10.1007/s12517-020-05541-1	[0016]	LZW	LZW-138	PASSIVE MARGIN	South China	Guangxi	Sandstone		Devonian Quartz sandstone		Detrital	LAICPMS										11200	8420	1460	0.093		0.0011	0.843		0.0321	0.0672		0.0021						559		8	569		16	616		90
https://doi.org/10.1007/s12517-020-05541-1	[0016]	LZW	LZW-139	PASSIVE MARGIN	South China	Guangxi	Sandstone		Devonian Quartz sandstone		Detrital	LAICPMS										14464	7979	6912	0.1387		0.0021	1.4245		0.0369	0.0739		0.0019						837		11.8	899		15.5	1038		56.5
https://doi.org/10.1007/s12517-020-05541-1	[0016]	LZW	LZW-140	PASSIVE MARGIN	South China	Guangxi	Sandstone		Devonian Quartz sandstone		Detrital	LAICPMS										1272	367	993	0.0967		0.006	0.7881		0.0561	0.0622		0.0034						595		35.5	590		31.8	680		114.8
https://doi.org/10.1007/s12040-020-01387-z	[0017]	BS1		PASSIVE MARGIN	India	Kandivalasa-Dibbalapalem Coast / Bay of Bengal	Unconsolidated Sand		Coastal Beach Sand		Detrital	EMPA					871		70
https://doi.org/10.1007/s12040-020-01387-z	[0017]	BS2		PASSIVE MARGIN	India	Kandivalasa-Dibbalapalem Coast / Bay of Bengal	Unconsolidated Sand		Coastal Beach Sand		Detrital	EMPA					487		37
https://doi.org/10.1007/s12040-020-01387-z	[0017]	BS3		PASSIVE MARGIN	India	Kandivalasa-Dibbalapalem Coast / Bay of Bengal	Unconsolidated Sand		Coastal Beach Sand		Detrital	EMPA					797		54
https://doi.org/10.1007/s12040-020-01387-z	[0017]	BS4		PASSIVE MARGIN	India	Kandivalasa-Dibbalapalem Coast / Bay of Bengal	Unconsolidated Sand		Coastal Beach Sand		Detrital	EMPA					849		53
https://doi.org/10.1007/s12040-020-01387-z	[0017]	BS5		PASSIVE MARGIN	India	Kandivalasa-Dibbalapalem Coast / Bay of Bengal	Unconsolidated Sand		Coastal Beach Sand		Detrital	EMPA					537		48
https://doi.org/10.1007/s12040-020-01387-z	[0017]	BS6		PASSIVE MARGIN	India	Kandivalasa-Dibbalapalem Coast / Bay of Bengal	Unconsolidated Sand		Coastal Beach Sand		Detrital	EMPA					977		78
https://doi.org/10.1007/s12040-020-01387-z	[0017]	BS7		PASSIVE MARGIN	India	Kandivalasa-Dibbalapalem Coast / Bay of Bengal	Unconsolidated Sand		Coastal Beach Sand		Detrital	EMPA					833		63
https://doi.org/10.1007/s12040-020-01387-z	[0017]	BS8		PASSIVE MARGIN	India	Kandivalasa-Dibbalapalem Coast / Bay of Bengal	Unconsolidated Sand		Coastal Beach Sand		Detrital	EMPA					794		56
https://doi.org/10.1007/s12040-020-01387-z	[0017]	BS9		PASSIVE MARGIN	India	Kandivalasa-Dibbalapalem Coast / Bay of Bengal	Unconsolidated Sand		Coastal Beach Sand		Detrital	EMPA					802		54
https://doi.org/10.1007/s12040-020-01387-z	[0017]	BS10		PASSIVE MARGIN	India	Kandivalasa-Dibbalapalem Coast / Bay of Bengal	Unconsolidated Sand		Coastal Beach Sand		Detrital	EMPA					845		42
https://doi.org/10.1007/s12040-020-01387-z	[0017]	BS11		PASSIVE MARGIN	India	Kandivalasa-Dibbalapalem Coast / Bay of Bengal	Unconsolidated Sand		Coastal Beach Sand		Detrital	EMPA					814		54
https://doi.org/10.1007/s12040-020-01387-z	[0017]	BS12		PASSIVE MARGIN	India	Kandivalasa-Dibbalapalem Coast / Bay of Bengal	Unconsolidated Sand		Coastal Beach Sand		Detrital	EMPA					807		71
https://doi.org/10.1007/s12040-020-01387-z	[0017]	BS13		PASSIVE MARGIN	India	Kandivalasa-Dibbalapalem Coast / Bay of Bengal	Unconsolidated Sand		Coastal Beach Sand		Detrital	EMPA					815		51
https://doi.org/10.1007/s12040-020-01387-z	[0017]	BS14		PASSIVE MARGIN	India	Kandivalasa-Dibbalapalem Coast / Bay of Bengal	Unconsolidated Sand		Coastal Beach Sand		Detrital	EMPA					814		37
https://doi.org/10.1007/s12040-020-01387-z	[0017]	BS15		PASSIVE MARGIN	India	Kandivalasa-Dibbalapalem Coast / Bay of Bengal	Unconsolidated Sand		Coastal Beach Sand		Detrital	EMPA					845		79
https://doi.org/10.1007/s12040-020-01387-z	[0017]	BS16		PASSIVE MARGIN	India	Kandivalasa-Dibbalapalem Coast / Bay of Bengal	Unconsolidated Sand		Coastal Beach Sand		Detrital	EMPA					764		97
https://doi.org/10.1007/s12040-020-01387-z	[0017]	DS17		PASSIVE MARGIN	India	Kandivalasa-Dibbalapalem Coast / Bay of Bengal	Unconsolidated Sand		Coastal Beach Sand		Detrital	EMPA					792		64
https://doi.org/10.1007/s12040-020-01387-z	[0017]	DS18		PASSIVE MARGIN	India	Kandivalasa-Dibbalapalem Coast / Bay of Bengal	Unconsolidated Sand		Coastal Beach Sand		Detrital	EMPA					846		69
https://doi.org/10.1007/s12040-020-01387-z	[0017]	DS19		PASSIVE MARGIN	India	Kandivalasa-Dibbalapalem Coast / Bay of Bengal	Unconsolidated Sand		Coastal Beach Sand		Detrital	EMPA					733		62
https://doi.org/10.1007/s12040-020-01387-z	[0017]	DS20		PASSIVE MARGIN	India	Kandivalasa-Dibbalapalem Coast / Bay of Bengal	Unconsolidated Sand		Coastal Beach Sand		Detrital	EMPA					721		38
https://doi.org/10.1007/s12040-020-01387-z	[0017]	DS21		PASSIVE MARGIN	India	Kandivalasa-Dibbalapalem Coast / Bay of Bengal	Unconsolidated Sand		Coastal Beach Sand		Detrital	EMPA					805		66
https://doi.org/10.1007/s12040-020-01387-z	[0017]	DS22		PASSIVE MARGIN	India	Kandivalasa-Dibbalapalem Coast / Bay of Bengal	Unconsolidated Sand		Coastal Beach Sand		Detrital	EMPA					826		46
https://doi.org/10.1007/s12040-020-01387-z	[0017]	DS23		PASSIVE MARGIN	India	Kandivalasa-Dibbalapalem Coast / Bay of Bengal	Unconsolidated Sand		Coastal Beach Sand		Detrital	EMPA					800		43
https://doi.org/10.1007/s12040-020-01387-z	[0017]	DS24		PASSIVE MARGIN	India	Kandivalasa-Dibbalapalem Coast / Bay of Bengal	Unconsolidated Sand		Coastal Beach Sand		Detrital	EMPA					875		78
https://doi.org/10.1007/s12040-020-01387-z	[0017]	DS25		PASSIVE MARGIN	India	Kandivalasa-Dibbalapalem Coast / Bay of Bengal	Unconsolidated Sand		Coastal Beach Sand		Detrital	EMPA					615		48
https://doi.org/10.1007/s12040-020-01387-z	[0017]	DS26		PASSIVE MARGIN	India	Kandivalasa-Dibbalapalem Coast / Bay of Bengal	Unconsolidated Sand		Coastal Beach Sand		Detrital	EMPA					793		56
https://doi.org/10.1007/s12040-020-01387-z	[0017]	DS27		PASSIVE MARGIN	India	Kandivalasa-Dibbalapalem Coast / Bay of Bengal	Unconsolidated Sand		Coastal Beach Sand		Detrital	EMPA					695		49
https://doi.org/10.1007/s12040-020-01387-z	[0017]	DS28		PASSIVE MARGIN	India	Kandivalasa-Dibbalapalem Coast / Bay of Bengal	Unconsolidated Sand		Coastal Beach Sand		Detrital	EMPA					725		43
https://doi.org/10.1007/s12040-020-01387-z	[0017]	DS29		PASSIVE MARGIN	India	Kandivalasa-Dibbalapalem Coast / Bay of Bengal	Unconsolidated Sand		Coastal Beach Sand		Detrital	EMPA					750		36
https://doi.org/10.1007/s12040-020-01387-z	[0017]	DS30		PASSIVE MARGIN	India	Kandivalasa-Dibbalapalem Coast / Bay of Bengal	Unconsolidated Sand		Coastal Beach Sand		Detrital	EMPA					781		76
https://doi.org/10.1007/s12040-020-01387-z	[0017]	DS31		PASSIVE MARGIN	India	Kandivalasa-Dibbalapalem Coast / Bay of Bengal	Unconsolidated Sand		Coastal Beach Sand		Detrital	EMPA					897		86
https://doi.org/10.1007/s12040-020-01387-z	[0017]	DS32		PASSIVE MARGIN	India	Kandivalasa-Dibbalapalem Coast / Bay of Bengal	Unconsolidated Sand		Coastal Beach Sand		Detrital	EMPA					805		51
https://doi.org/10.1007/s12040-020-01387-z	[0017]	DS33		PASSIVE MARGIN	India	Kandivalasa-Dibbalapalem Coast / Bay of Bengal	Unconsolidated Sand		Coastal Beach Sand		Detrital	EMPA					958		75
https://doi.org/10.1111/jmg.12534	[0018]	ZN26D3	ZN26D3_140_1-1	OROGEN	India	Gianbul dome / Zanskar crystalline complex / NW Himalayan Orogen	Metapelite	Amphibolite	Garnet-Staurolite Schist		Metamorphic	LAICPMS									207 Corr.	89900	6840	39750	2.51572e-05	39750					0.0737								29.0168		0.664559
https://doi.org/10.1111/jmg.12534	[0018]	ZN26D3	ZN26D3_139_1-3	OROGEN	India	Gianbul dome / Zanskar crystalline complex / NW Himalayan Orogen	Metapelite	Amphibolite	Garnet-Staurolite Schist		Metamorphic	LAICPMS									207 Corr.	80300	5040	45937.5	2.17687e-05	45937.5					0.0568								28.8085		0.669834
https://doi.org/10.1111/jmg.12534	[0018]	ZN26D3	ZN26D3_139_1-2	OROGEN	India	Gianbul dome / Zanskar crystalline complex / NW Himalayan Orogen	Metapelite	Amphibolite	Garnet-Staurolite Schist		Metamorphic	LAICPMS									207 Corr.	90200	5740	49250	2.03046e-05	49250					0.0573								28.7962		0.720681
https://doi.org/10.1111/jmg.12534	[0018]	ZN26D3	ZN26D3_139_1-4	OROGEN	India	Gianbul dome / Zanskar crystalline complex / NW Himalayan Orogen	Metapelite	Amphibolite	Garnet-Staurolite Schist		Metamorphic	LAICPMS									207 Corr.	87900	5740	46312.5	2.15924e-05	46312.5					0.0581								28.7665		0.714102
https://doi.org/10.1111/jmg.12534	[0018]	ZN26D3	ZN26D3_139_1-1	OROGEN	India	Gianbul dome / Zanskar crystalline complex / NW Himalayan Orogen	Metapelite	Amphibolite	Garnet-Staurolite Schist		Metamorphic	LAICPMS									207 Corr.	70700	5570	40375	2.47678e-05	40375					0.0556								28.6182		0.625401
https://doi.org/10.1111/jmg.12534	[0018]	ZN26D3	ZN26D3_140_1-2	OROGEN	India	Gianbul dome / Zanskar crystalline complex / NW Himalayan Orogen	Metapelite	Amphibolite	Garnet-Staurolite Schist		Metamorphic	LAICPMS									207 Corr.	71400	5950	28750	3.47826e-05	28750					0.089								28.5339		0.873192
https://doi.org/10.1111/jmg.12534	[0018]	ZN26D4	ZN26D4_120_1-3	OROGEN	India	Gianbul dome / Zanskar crystalline complex / NW Himalayan Orogen	Metapelite	Amphibolite	Garnet-Staurolite Schist		Metamorphic	LAICPMS									207 Corr.	42200	6460	25175	3.97219e-05	25175					0.11								30.1996		0.781338
https://doi.org/10.1111/jmg.12534	[0018]	ZN26D4	ZN26D4_120_1-1	OROGEN	India	Gianbul dome / Zanskar crystalline complex / NW Himalayan Orogen	Metapelite	Amphibolite	Garnet-Staurolite Schist		Metamorphic	LAICPMS									207 Corr.	53700	6440	15250	6.55738e-05	15250					0.0764								30.1241		0.759034
https://doi.org/10.1111/jmg.12534	[0018]	ZN26D4	ZN26D4_120_1-2	OROGEN	India	Gianbul dome / Zanskar crystalline complex / NW Himalayan Orogen	Metapelite	Amphibolite	Garnet-Staurolite Schist		Metamorphic	LAICPMS									207 Corr.	41500	6210	21875	4.57143e-05	21875					0.0827								29.7134		0.627119
https://doi.org/10.1111/jmg.12534	[0018]	ZN26D4	ZN26D4_118_3-2	OROGEN	India	Gianbul dome / Zanskar crystalline complex / NW Himalayan Orogen	Metapelite	Amphibolite	Garnet-Staurolite Schist		Metamorphic	LAICPMS									207 Corr.	19900	6840	10800	9.25926e-05	10800					0.0497								29.6931		0.653956
https://doi.org/10.1111/jmg.12534	[0018]	ZN26D4	ZN26D4_118_3-6	OROGEN	India	Gianbul dome / Zanskar crystalline complex / NW Himalayan Orogen	Metapelite	Amphibolite	Garnet-Staurolite Schist		Metamorphic	LAICPMS									207 Corr.	23600	6360	12118.8	8.25168e-05	12118.7					0.0645								29.5826		0.68771
https://doi.org/10.1111/jmg.12534	[0018]	ZN26D4	ZN26D4_121_1-1	OROGEN	India	Gianbul dome / Zanskar crystalline complex / NW Himalayan Orogen	Metapelite	Amphibolite	Garnet-Staurolite Schist		Metamorphic	LAICPMS									207 Corr.	24100	6670	13575	7.36648e-05	13575					0.0532								29.3945		0.853029
https://doi.org/10.1111/jmg.12534	[0018]	ZN26D4	ZN26D4_120_1-4	OROGEN	India	Gianbul dome / Zanskar crystalline complex / NW Himalayan Orogen	Metapelite	Amphibolite	Garnet-Staurolite Schist		Metamorphic	LAICPMS									207 Corr.	37200	6500	17062.5	5.86081e-05	17062.5					0.0974								29.3881		0.743101
https://doi.org/10.1111/jmg.12534	[0018]	ZN26D4	ZN26D4_118_3-5	OROGEN	India	Gianbul dome / Zanskar crystalline complex / NW Himalayan Orogen	Metapelite	Amphibolite	Garnet-Staurolite Schist		Metamorphic	LAICPMS									207 Corr.	25800	8040	13393.8	7.46617e-05	13393.8					0.0496								29.3578		0.654927
https://doi.org/10.1111/jmg.12534	[0018]	ZN26D2	ZN26D2_132_1-2	OROGEN	India	Gianbul dome / Zanskar crystalline complex / NW Himalayan Orogen	Metapelite	Amphibolite	Garnet-Staurolite Schist		Metamorphic	LAICPMS									207 Corr.	20200	4150	15212.5	6.57354e-05	15212.5					0.0581								29.336		0.643244
https://doi.org/10.1111/jmg.12534	[0018]	ZN26D	ZN26D_62_1-2	OROGEN	India	Gianbul dome / Zanskar crystalline complex / NW Himalayan Orogen	Metapelite	Amphibolite	Garnet-Staurolite Schist		Metamorphic	LAICPMS									207 Corr.	47200	5290	33500	2.98507e-05	33500					0.0634								29.3359		0.707139
https://doi.org/10.1111/jmg.12534	[0018]	ZN26D2	ZN26D2_129_1-4	OROGEN	India	Gianbul dome / Zanskar crystalline complex / NW Himalayan Orogen	Metapelite	Amphibolite	Garnet-Staurolite Schist		Metamorphic	LAICPMS									207 Corr.	41300	7100	26000	3.84615e-05	26000					0.0559								29.3116		0.60687
https://doi.org/10.1111/jmg.12534	[0018]	ZN26D2	ZN26D2_129_1-2	OROGEN	India	Gianbul dome / Zanskar crystalline complex / NW Himalayan Orogen	Metapelite	Amphibolite	Garnet-Staurolite Schist		Metamorphic	LAICPMS									207 Corr.	42600	6370	27525	3.63306e-05	27525					0.0525								29.2871		0.632506
https://doi.org/10.1111/jmg.12534	[0018]	ZN26D3	ZN26D3_133_1-3	OROGEN	India	Gianbul dome / Zanskar crystalline complex / NW Himalayan Orogen	Metapelite	Amphibolite	Garnet-Staurolite Schist		Metamorphic	LAICPMS									207 Corr.	50700	5780	26693.8	3.7462e-05	26693.8					0.0636								29.2843		0.64147
https://doi.org/10.1111/jmg.12534	[0018]	ZN26D4	ZN26D4_117_3-6	OROGEN	India	Gianbul dome / Zanskar crystalline complex / NW Himalayan Orogen	Metapelite	Amphibolite	Garnet-Staurolite Schist		Metamorphic	LAICPMS									207 Corr.	30500	5780	15868.8	6.30169e-05	15868.7					0.0537								29.242		0.690218
https://doi.org/10.1111/jmg.12534	[0018]	ZN26D4	ZN26D4_121_1-6	OROGEN	India	Gianbul dome / Zanskar crystalline complex / NW Himalayan Orogen	Metapelite	Amphibolite	Garnet-Staurolite Schist		Metamorphic	LAICPMS									207 Corr.	31500	5520	19375	5.16129e-05	19375					0.102								29.2277		1.42809
https://doi.org/10.1111/jmg.12534	[0018]	ZN26D2	ZN26D2_125_1-1	OROGEN	India	Gianbul dome / Zanskar crystalline complex / NW Himalayan Orogen	Metapelite	Amphibolite	Garnet-Staurolite Schist		Metamorphic	LAICPMS									207 Corr.	25100	6530	18118.8	5.51914e-05	18118.8					0.0945								29.1244		0.817842
https://doi.org/10.1111/jmg.12534	[0018]	ZN26D4	ZN26D4_117_3-7	OROGEN	India	Gianbul dome / Zanskar crystalline complex / NW Himalayan Orogen	Metapelite	Amphibolite	Garnet-Staurolite Schist		Metamorphic	LAICPMS									207 Corr.	30600	7950	9625	0.000103896	9625					0.052								29.0827		0.685585
https://doi.org/10.1111/jmg.12534	[0018]	ZN26D	ZN26D_76_1-3	OROGEN	India	Gianbul dome / Zanskar crystalline complex / NW Himalayan Orogen	Metapelite	Amphibolite	Garnet-Staurolite Schist		Metamorphic	LAICPMS									207 Corr.	91200	4340	61062.5	1.63767e-05	61062.5					0.0579								29.0777		0.743009
https://doi.org/10.1111/jmg.12534	[0018]	ZN26D4	ZN26D4_117_3-5	OROGEN	India	Gianbul dome / Zanskar crystalline complex / NW Himalayan Orogen	Metapelite	Amphibolite	Garnet-Staurolite Schist		Metamorphic	LAICPMS									207 Corr.	29500	6850	16337.5	6.12089e-05	16337.5					0.0517								29.0493		0.72814
https://doi.org/10.1111/jmg.12534	[0018]	ZN26D4	ZN26D4_121_1-3	OROGEN	India	Gianbul dome / Zanskar crystalline complex / NW Himalayan Orogen	Metapelite	Amphibolite	Garnet-Staurolite Schist		Metamorphic	LAICPMS									207 Corr.	38200	6850	21762.5	4.59506e-05	21762.5					0.0495								29.0172		0.766263
https://doi.org/10.1111/jmg.12534	[0018]	ZN26D4	ZN26D4_124_1-1	OROGEN	India	Gianbul dome / Zanskar crystalline complex / NW Himalayan Orogen	Metapelite	Amphibolite	Garnet-Staurolite Schist		Metamorphic	LAICPMS									207 Corr.	105800	7200	54500	1.83486e-05	54500					0.0554								29.0003		0.913718
https://doi.org/10.1111/jmg.12534	[0018]	ZN26D2	ZN26D2_125_1-2	OROGEN	India	Gianbul dome / Zanskar crystalline complex / NW Himalayan Orogen	Metapelite	Amphibolite	Garnet-Staurolite Schist		Metamorphic	LAICPMS									207 Corr.	33100	6240	22668.8	4.41136e-05	22668.8					0.0523								28.995		0.622855
https://doi.org/10.1111/jmg.12534	[0018]	ZN26D2	ZN26D2_126_1-2	OROGEN	India	Gianbul dome / Zanskar crystalline complex / NW Himalayan Orogen	Metapelite	Amphibolite	Garnet-Staurolite Schist		Metamorphic	LAICPMS									207 Corr.	31200	6650	19375	5.16129e-05	19375					0.079								28.8999		0.741873
https://doi.org/10.1111/jmg.12534	[0018]	ZN26D4	ZN26D4_124_1-2	OROGEN	India	Gianbul dome / Zanskar crystalline complex / NW Himalayan Orogen	Metapelite	Amphibolite	Garnet-Staurolite Schist		Metamorphic	LAICPMS									207 Corr.	137300	6270	68187.5	1.46654e-05	68187.5					0.058								28.8461		0.627917
https://doi.org/10.1111/jmg.12534	[0018]	ZN26D4	ZN26D4_117_3-3	OROGEN	India	Gianbul dome / Zanskar crystalline complex / NW Himalayan Orogen	Metapelite	Amphibolite	Garnet-Staurolite Schist		Metamorphic	LAICPMS									207 Corr.	38000	8690	15625	6.4e-05	15625					0.0666								28.8319		0.694515
https://doi.org/10.1111/jmg.12534	[0018]	ZN26D4	ZN26D4_118_3-7	OROGEN	India	Gianbul dome / Zanskar crystalline complex / NW Himalayan Orogen	Metapelite	Amphibolite	Garnet-Staurolite Schist		Metamorphic	LAICPMS									207 Corr.	30500	6300	16625	6.01504e-05	16625					0.0534								28.8268		0.620264
https://doi.org/10.1111/jmg.12534	[0018]	ZN26D4	ZN26D4_118_3-4	OROGEN	India	Gianbul dome / Zanskar crystalline complex / NW Himalayan Orogen	Metapelite	Amphibolite	Garnet-Staurolite Schist		Metamorphic	LAICPMS									207 Corr.	25300	6710	14475	6.90846e-05	14475					0.053								28.8225		0.622256
https://doi.org/10.1111/jmg.12534	[0018]	ZN26D4	ZN26D4_119_1-7	OROGEN	India	Gianbul dome / Zanskar crystalline complex / NW Himalayan Orogen	Metapelite	Amphibolite	Garnet-Staurolite Schist		Metamorphic	LAICPMS									207 Corr.	91100	6360	45875	2.17984e-05	45875					0.0563								28.789		0.635074
https://doi.org/10.1111/jmg.12534	[0018]	ZN26D4	ZN26D4_119_1-2	OROGEN	India	Gianbul dome / Zanskar crystalline complex / NW Himalayan Orogen	Metapelite	Amphibolite	Garnet-Staurolite Schist		Metamorphic	LAICPMS									207 Corr.	67200	5640	33312.5	3.00188e-05	33312.5					0.0566								28.7399		0.658595
https://doi.org/10.1111/jmg.12534	[0018]	ZN26D4	ZN26D4_121_1-4	OROGEN	India	Gianbul dome / Zanskar crystalline complex / NW Himalayan Orogen	Metapelite	Amphibolite	Garnet-Staurolite Schist		Metamorphic	LAICPMS									207 Corr.	36600	6480	20262.5	4.93523e-05	20262.5					0.0514								28.7349		0.681712
https://doi.org/10.1111/jmg.12534	[0018]	ZN26D4	ZN26D4_117_3-1	OROGEN	India	Gianbul dome / Zanskar crystalline complex / NW Himalayan Orogen	Metapelite	Amphibolite	Garnet-Staurolite Schist		Metamorphic	LAICPMS									207 Corr.	36200	7880	19031.2	5.25452e-05	19031.2					0.0774								28.7331		0.652685
https://doi.org/10.1111/jmg.12534	[0018]	ZN26D4	ZN26D4_117_3-4	OROGEN	India	Gianbul dome / Zanskar crystalline complex / NW Himalayan Orogen	Metapelite	Amphibolite	Garnet-Staurolite Schist		Metamorphic	LAICPMS									207 Corr.	40700	9440	17250	5.7971e-05	17250					0.0529								28.7242		0.63104
https://doi.org/10.1111/jmg.12534	[0018]	ZN26D4	ZN26D4_121_1-2	OROGEN	India	Gianbul dome / Zanskar crystalline complex / NW Himalayan Orogen	Metapelite	Amphibolite	Garnet-Staurolite Schist		Metamorphic	LAICPMS									207 Corr.	35200	8160	14187.5	7.04846e-05	14187.5					0.0546								28.706		0.715479
https://doi.org/10.1111/jmg.12534	[0018]	ZN26D	ZN26D_76_1-1	OROGEN	India	Gianbul dome / Zanskar crystalline complex / NW Himalayan Orogen	Metapelite	Amphibolite	Garnet-Staurolite Schist		Metamorphic	LAICPMS									207 Corr.	121000	5390	61000	1.63934e-05	61000					0.0751								28.697		0.951106
https://doi.org/10.1111/jmg.12534	[0018]	ZN26D	ZN26D_62_1-1	OROGEN	India	Gianbul dome / Zanskar crystalline complex / NW Himalayan Orogen	Metapelite	Amphibolite	Garnet-Staurolite Schist		Metamorphic	LAICPMS									207 Corr.	34300	4560	25437.5	3.9312e-05	25437.5					0.0823								28.626		0.702169
https://doi.org/10.1111/jmg.12534	[0018]	ZN26D4	ZN26D4_119_1-3	OROGEN	India	Gianbul dome / Zanskar crystalline complex / NW Himalayan Orogen	Metapelite	Amphibolite	Garnet-Staurolite Schist		Metamorphic	LAICPMS									207 Corr.	67500	5830	36437.5	2.74443e-05	36437.5					0.0533								28.5949		0.624709
https://doi.org/10.1111/jmg.12534	[0018]	ZN26D4	ZN26D4_119_1-4	OROGEN	India	Gianbul dome / Zanskar crystalline complex / NW Himalayan Orogen	Metapelite	Amphibolite	Garnet-Staurolite Schist		Metamorphic	LAICPMS									207 Corr.	83400	5740	45375	2.20386e-05	45375					0.0591								28.5713		0.648473
https://doi.org/10.1111/jmg.12534	[0018]	ZN26D4	ZN26D4_119_3-1	OROGEN	India	Gianbul dome / Zanskar crystalline complex / NW Himalayan Orogen	Metapelite	Amphibolite	Garnet-Staurolite Schist		Metamorphic	LAICPMS									207 Corr.	97500	6450	52625	1.90024e-05	52625					0.0654								28.57		0.633824
https://doi.org/10.1111/jmg.12534	[0018]	ZN26D2	ZN26D2_129_1-6	OROGEN	India	Gianbul dome / Zanskar crystalline complex / NW Himalayan Orogen	Metapelite	Amphibolite	Garnet-Staurolite Schist		Metamorphic	LAICPMS									207 Corr.	30000	6010	19575	5.10856e-05	19575					0.0513								28.5407		0.605559
https://doi.org/10.1111/jmg.12534	[0018]	ZN26D4	ZN26D4_119_1-6	OROGEN	India	Gianbul dome / Zanskar crystalline complex / NW Himalayan Orogen	Metapelite	Amphibolite	Garnet-Staurolite Schist		Metamorphic	LAICPMS									207 Corr.	93200	6540	46937.5	2.13049e-05	46937.5					0.0546								28.528		0.621314
https://doi.org/10.1111/jmg.12534	[0018]	ZN26D3	ZN26D3_136_1-2	OROGEN	India	Gianbul dome / Zanskar crystalline complex / NW Himalayan Orogen	Metapelite	Amphibolite	Garnet-Staurolite Schist		Metamorphic	LAICPMS									207 Corr.	99810	5090	50687.5	1.97287e-05	50687.5					0.0695								28.5043		0.705937
https://doi.org/10.1111/jmg.12534	[0018]	ZN26D2	ZN26D2_132_1-3	OROGEN	India	Gianbul dome / Zanskar crystalline complex / NW Himalayan Orogen	Metapelite	Amphibolite	Garnet-Staurolite Schist		Metamorphic	LAICPMS									207 Corr.	32500	6800	22562.5	4.43213e-05	22562.5					0.0506								28.496		0.663699
https://doi.org/10.1111/jmg.12534	[0018]	ZN26D4	ZN26D4_122_1-2	OROGEN	India	Gianbul dome / Zanskar crystalline complex / NW Himalayan Orogen	Metapelite	Amphibolite	Garnet-Staurolite Schist		Metamorphic	LAICPMS									207 Corr.	45100	8310	18500	5.40541e-05	18500					0.0562								28.4946		0.732259
https://doi.org/10.1111/jmg.12534	[0018]	ZN26D2	ZN26D2_129_1-5	OROGEN	India	Gianbul dome / Zanskar crystalline complex / NW Himalayan Orogen	Metapelite	Amphibolite	Garnet-Staurolite Schist		Metamorphic	LAICPMS									207 Corr.	42100	8100	28850	3.4662e-05	28850					0.0516								28.434		0.606572
https://doi.org/10.1111/jmg.12534	[0018]	ZN26D3	ZN26D3_134_1-1	OROGEN	India	Gianbul dome / Zanskar crystalline complex / NW Himalayan Orogen	Metapelite	Amphibolite	Garnet-Staurolite Schist		Metamorphic	LAICPMS									207 Corr.	88800	7890	33562.5	2.97952e-05	33562.5					0.0565								28.4328		0.643151
https://doi.org/10.1111/jmg.12534	[0018]	ZN26D4	ZN26D4_118_1-2	OROGEN	India	Gianbul dome / Zanskar crystalline complex / NW Himalayan Orogen	Metapelite	Amphibolite	Garnet-Staurolite Schist		Metamorphic	LAICPMS									207 Corr.	66200	8630	32181.2	3.1074e-05	32181.2					0.1026								28.4165		0.663425
https://doi.org/10.1111/jmg.12534	[0018]	ZN26D4	ZN26D4_118_3-3	OROGEN	India	Gianbul dome / Zanskar crystalline complex / NW Himalayan Orogen	Metapelite	Amphibolite	Garnet-Staurolite Schist		Metamorphic	LAICPMS									207 Corr.	28100	6820	15193.8	6.58165e-05	15193.8					0.0525								28.4012		0.678568
https://doi.org/10.1111/jmg.12534	[0018]	ZN26D	ZN26D_76_1-2	OROGEN	India	Gianbul dome / Zanskar crystalline complex / NW Himalayan Orogen	Metapelite	Amphibolite	Garnet-Staurolite Schist		Metamorphic	LAICPMS									207 Corr.	77900	3870	53750	1.86047e-05	53750					0.0857								28.3862		0.849506
https://doi.org/10.1111/jmg.12534	[0018]	ZN26D4	ZN26D4_118_1-3	OROGEN	India	Gianbul dome / Zanskar crystalline complex / NW Himalayan Orogen	Metapelite	Amphibolite	Garnet-Staurolite Schist		Metamorphic	LAICPMS									207 Corr.	36200	8500	11331.2	8.82515e-05	11331.2					0.074								28.3359		0.68134
https://doi.org/10.1111/jmg.12534	[0018]	ZN26D3	ZN26D3_135_1-1	OROGEN	India	Gianbul dome / Zanskar crystalline complex / NW Himalayan Orogen	Metapelite	Amphibolite	Garnet-Staurolite Schist		Metamorphic	LAICPMS									207 Corr.	120800	9060	46062.5	2.17096e-05	46062.5					0.0574								28.2795		0.713991
https://doi.org/10.1111/jmg.12534	[0018]	ZN26D4	ZN26D4_118_3-8	OROGEN	India	Gianbul dome / Zanskar crystalline complex / NW Himalayan Orogen	Metapelite	Amphibolite	Garnet-Staurolite Schist		Metamorphic	LAICPMS									207 Corr.	27700	6860	14937.5	6.69456e-05	14937.5					0.0706								28.2328		0.6309
https://doi.org/10.1111/jmg.12534	[0018]	ZN26D2	ZN26D2_126_1-1	OROGEN	India	Gianbul dome / Zanskar crystalline complex / NW Himalayan Orogen	Metapelite	Amphibolite	Garnet-Staurolite Schist		Metamorphic	LAICPMS									207 Corr.	35400	7550	19287.5	5.18471e-05	19287.5					0.0577								28.2305		0.660714
https://doi.org/10.1111/jmg.12534	[0018]	ZN26D4	ZN26D4_118_3-1	OROGEN	India	Gianbul dome / Zanskar crystalline complex / NW Himalayan Orogen	Metapelite	Amphibolite	Garnet-Staurolite Schist		Metamorphic	LAICPMS									207 Corr.	23500	7250	12418.8	8.05234e-05	12418.8					0.0541								28.2283		0.664759
https://doi.org/10.1111/jmg.12534	[0018]	ZN26D4	ZN26D4_119_1-5	OROGEN	India	Gianbul dome / Zanskar crystalline complex / NW Himalayan Orogen	Metapelite	Amphibolite	Garnet-Staurolite Schist		Metamorphic	LAICPMS									207 Corr.	75100	5940	24875	4.0201e-05	24875					0.0614								28.2278		0.757554
https://doi.org/10.1111/jmg.12534	[0018]	ZN26D3	ZN26D3_134_1-2	OROGEN	India	Gianbul dome / Zanskar crystalline complex / NW Himalayan Orogen	Metapelite	Amphibolite	Garnet-Staurolite Schist		Metamorphic	LAICPMS									207 Corr.	84200	7630	21250	4.70588e-05	21250					0.0643								28.2156		0.807993
https://doi.org/10.1111/jmg.12534	[0018]	ZN26D4	ZN26D4_122_1-1	OROGEN	India	Gianbul dome / Zanskar crystalline complex / NW Himalayan Orogen	Metapelite	Amphibolite	Garnet-Staurolite Schist		Metamorphic	LAICPMS									207 Corr.	42100	6680	24062.5	4.15584e-05	24062.5					0.0524								28.2072		0.644612
https://doi.org/10.1111/jmg.12534	[0018]	ZN26D4	ZN26D4_117_3-2	OROGEN	India	Gianbul dome / Zanskar crystalline complex / NW Himalayan Orogen	Metapelite	Amphibolite	Garnet-Staurolite Schist		Metamorphic	LAICPMS									207 Corr.	33100	7220	18062.5	5.53633e-05	18062.5					0.0632								28.1681		0.70313
https://doi.org/10.1111/jmg.12534	[0018]	ZN26D3	ZN26D3_136_1-1	OROGEN	India	Gianbul dome / Zanskar crystalline complex / NW Himalayan Orogen	Metapelite	Amphibolite	Garnet-Staurolite Schist		Metamorphic	LAICPMS									207 Corr.	90600	5070	44175	2.26372e-05	44175					0.0754								28.1474		0.661602
https://doi.org/10.1111/jmg.12534	[0018]	ZN26D4	ZN26D4_118_1-1	OROGEN	India	Gianbul dome / Zanskar crystalline complex / NW Himalayan Orogen	Metapelite	Amphibolite	Garnet-Staurolite Schist		Metamorphic	LAICPMS									207 Corr.	38800	8920	13843.8	7.22348e-05	13843.8					0.0881								28.1428		0.879021
https://doi.org/10.1111/jmg.12534	[0018]	ZN26D4	ZN26D4_121_1-5	OROGEN	India	Gianbul dome / Zanskar crystalline complex / NW Himalayan Orogen	Metapelite	Amphibolite	Garnet-Staurolite Schist		Metamorphic	LAICPMS									207 Corr.	33700	7690	17925	5.5788e-05	17925					0.0507								28.1346		0.601278
https://doi.org/10.1111/jmg.12534	[0018]	ZN26D4	ZN26D4_119_1-1	OROGEN	India	Gianbul dome / Zanskar crystalline complex / NW Himalayan Orogen	Metapelite	Amphibolite	Garnet-Staurolite Schist		Metamorphic	LAICPMS									207 Corr.	91300	6840	50125	1.99501e-05	50125					0.0549								28.0213		0.653328
https://doi.org/10.1111/jmg.12534	[0018]	ZN26D2	ZN26D2_129_1-1	OROGEN	India	Gianbul dome / Zanskar crystalline complex / NW Himalayan Orogen	Metapelite	Amphibolite	Garnet-Staurolite Schist		Metamorphic	LAICPMS									207 Corr.	30500	7370	19450	5.14139e-05	19450					0.0586								27.9131		0.612677
https://doi.org/10.1111/jmg.12534	[0018]	ZN26D4	ZN26D4_124_1-3	OROGEN	India	Gianbul dome / Zanskar crystalline complex / NW Himalayan Orogen	Metapelite	Amphibolite	Garnet-Staurolite Schist		Metamorphic	LAICPMS									207 Corr.	171000	7970	65562.5	1.52526e-05	65562.5					0.0595								27.3941		0.843594
https://doi.org/10.1111/jmg.12534	[0018]	ZN26D	ZN26D_76_1-4	OROGEN	India	Gianbul dome / Zanskar crystalline complex / NW Himalayan Orogen	Metapelite	Amphibolite	Garnet-Staurolite Schist		Metamorphic	LAICPMS									207 Corr.	91600	5430	49937.5	2.0025e-05	49937.5					0.0593								27.2496		0.689293
https://doi.org/10.1111/jmg.12534	[0018]	ZN26D	ZN26D_75_1-2	OROGEN	India	Gianbul dome / Zanskar crystalline complex / NW Himalayan Orogen	Metapelite	Amphibolite	Garnet-Staurolite Schist		Metamorphic	LAICPMS									207 Corr.	130400	5740	86875	1.15108e-05	86875					0.1645								30.3174		0.914582
https://doi.org/10.1111/jmg.12534	[0018]	ZN26D	ZN26D_70_1-1	OROGEN	India	Gianbul dome / Zanskar crystalline complex / NW Himalayan Orogen	Metapelite	Amphibolite	Garnet-Staurolite Schist		Metamorphic	LAICPMS									207 Corr.	114400	5010	77375	1.29241e-05	77375					0.0574								29.6855		0.816771
https://doi.org/10.1111/jmg.12534	[0018]	ZN26D	ZN26D_77_1-1	OROGEN	India	Gianbul dome / Zanskar crystalline complex / NW Himalayan Orogen	Metapelite	Amphibolite	Garnet-Staurolite Schist		Metamorphic	LAICPMS									207 Corr.	78700	4460	56387.5	1.77344e-05	56387.5					0.0642								29.5314		0.698863
https://doi.org/10.1111/jmg.12534	[0018]	ZN26D	ZN26D_69_1-2	OROGEN	India	Gianbul dome / Zanskar crystalline complex / NW Himalayan Orogen	Metapelite	Amphibolite	Garnet-Staurolite Schist		Metamorphic	LAICPMS									207 Corr.	79300	4990	55812.5	1.79171e-05	55812.5					0.0611								29.5247		0.652384
https://doi.org/10.1111/jmg.12534	[0018]	ZN26D	ZN26D_63_1-2	OROGEN	India	Gianbul dome / Zanskar crystalline complex / NW Himalayan Orogen	Metapelite	Amphibolite	Garnet-Staurolite Schist		Metamorphic	LAICPMS									207 Corr.	45600	4890	32250	3.10078e-05	32250					0.0533								29.1743		0.62678
https://doi.org/10.1111/jmg.12534	[0018]	ZN26D	ZN26D_69_1-1	OROGEN	India	Gianbul dome / Zanskar crystalline complex / NW Himalayan Orogen	Metapelite	Amphibolite	Garnet-Staurolite Schist		Metamorphic	LAICPMS									207 Corr.	69800	5420	44187.5	2.26308e-05	44187.5					0.0598								28.9368		0.785318
https://doi.org/10.1111/jmg.12534	[0018]	ZN26D	ZN26D_70_1-3	OROGEN	India	Gianbul dome / Zanskar crystalline complex / NW Himalayan Orogen	Metapelite	Amphibolite	Garnet-Staurolite Schist		Metamorphic	LAICPMS									207 Corr.	128100	5280	92312.5	1.08328e-05	92312.5					0.0739								28.9162		0.64845
https://doi.org/10.1111/jmg.12534	[0018]	ZN26D4	ZN26D4_117_1-5	OROGEN	India	Gianbul dome / Zanskar crystalline complex / NW Himalayan Orogen	Metapelite	Amphibolite	Garnet-Staurolite Schist		Metamorphic	LAICPMS									207 Corr.	48700	8240	27312.5	3.66133e-05	27312.5					0.0493								28.9083		0.608473
https://doi.org/10.1111/jmg.12534	[0018]	ZN26D	ZN26D_69_1-3	OROGEN	India	Gianbul dome / Zanskar crystalline complex / NW Himalayan Orogen	Metapelite	Amphibolite	Garnet-Staurolite Schist		Metamorphic	LAICPMS									207 Corr.	98000	5400	47687.5	2.09699e-05	47687.5					0.0792								28.8492		0.854401
https://doi.org/10.1111/jmg.12534	[0018]	ZN26D4	ZN26D4_117_1-6	OROGEN	India	Gianbul dome / Zanskar crystalline complex / NW Himalayan Orogen	Metapelite	Amphibolite	Garnet-Staurolite Schist		Metamorphic	LAICPMS									207 Corr.	45800	8070	24562.5	4.07125e-05	24562.5					0.0507								28.8054		0.670788
https://doi.org/10.1111/jmg.12534	[0018]	ZN26D	ZN26D_75_1-1	OROGEN	India	Gianbul dome / Zanskar crystalline complex / NW Himalayan Orogen	Metapelite	Amphibolite	Garnet-Staurolite Schist		Metamorphic	LAICPMS									207 Corr.	120100	4990	67625	1.47874e-05	67625					0.149								28.5718		0.983011
https://doi.org/10.1111/jmg.12534	[0018]	ZN26D4	ZN26D4_117_1-2	OROGEN	India	Gianbul dome / Zanskar crystalline complex / NW Himalayan Orogen	Metapelite	Amphibolite	Garnet-Staurolite Schist		Metamorphic	LAICPMS									207 Corr.	44900	7120	19062.5	5.2459e-05	19062.5					0.0565								28.5026		0.695912
https://doi.org/10.1111/jmg.12534	[0018]	ZN26D4	ZN26D4_117_1-4	OROGEN	India	Gianbul dome / Zanskar crystalline complex / NW Himalayan Orogen	Metapelite	Amphibolite	Garnet-Staurolite Schist		Metamorphic	LAICPMS									207 Corr.	44200	7440	24062.5	4.15584e-05	24062.5					0.0522								28.2718		0.579782
https://doi.org/10.1111/jmg.12534	[0018]	ZN26D4	ZN26D4_117_1-1	OROGEN	India	Gianbul dome / Zanskar crystalline complex / NW Himalayan Orogen	Metapelite	Amphibolite	Garnet-Staurolite Schist		Metamorphic	LAICPMS									207 Corr.	38400	7550	16006.2	6.24756e-05	16006.2					0.054								27.8757		0.743171
https://doi.org/10.1111/jmg.12534	[0018]	ZN26D	ZN26D_74_1-1	OROGEN	India	Gianbul dome / Zanskar crystalline complex / NW Himalayan Orogen	Metapelite	Amphibolite	Garnet-Staurolite Schist		Metamorphic	LAICPMS									207 Corr.	146000	6080	87625	1.14123e-05	87625					0.0615								27.7642		1.15465
https://doi.org/10.1111/jmg.12534	[0018]	ZN26D	ZN26D_70_1-4	OROGEN	India	Gianbul dome / Zanskar crystalline complex / NW Himalayan Orogen	Metapelite	Amphibolite	Garnet-Staurolite Schist		Metamorphic	LAICPMS									207 Corr.	106700	5260	53750	1.86047e-05	53750					0.0868								27.4303		0.609237
https://doi.org/10.1111/jmg.12534	[0018]	ZN26D4	ZN26D4_117_1-3	OROGEN	India	Gianbul dome / Zanskar crystalline complex / NW Himalayan Orogen	Metapelite	Amphibolite	Garnet-Staurolite Schist		Metamorphic	LAICPMS									207 Corr.	35800	6240	19687.5	5.07937e-05	19687.5					0.0543								27.4261		0.636757
https://doi.org/10.1111/jmg.12534	[0018]	ZN26D	ZN26D_70_1-2	OROGEN	India	Gianbul dome / Zanskar crystalline complex / NW Himalayan Orogen	Metapelite	Amphibolite	Garnet-Staurolite Schist		Metamorphic	LAICPMS									207 Corr.	85100	4890	52062.5	1.92077e-05	52062.5					0.116								26.7932		1.4048
https://doi.org/10.1111/jmg.12534	[0018]	ZN26D	ZN26D_74_1-3	OROGEN	India	Gianbul dome / Zanskar crystalline complex / NW Himalayan Orogen	Metapelite	Amphibolite	Garnet-Staurolite Schist		Metamorphic	LAICPMS									207 Corr.	109500	9070	68875	1.45191e-05	68875					0.073								26.6293		0.826692
https://doi.org/10.1111/jmg.12534	[0018]	ZN26D	ZN26D_63_1-1	OROGEN	India	Gianbul dome / Zanskar crystalline complex / NW Himalayan Orogen	Metapelite	Amphibolite	Garnet-Staurolite Schist		Metamorphic	LAICPMS									207 Corr.	54600	5980	35437.5	2.82187e-05	35437.5					0.081								25.6481		1.13474
https://doi.org/10.1111/jmg.12534	[0018]	ZN26D	ZN26D_75_1-3	OROGEN	India	Gianbul dome / Zanskar crystalline complex / NW Himalayan Orogen	Metapelite	Amphibolite	Garnet-Staurolite Schist		Metamorphic	LAICPMS									207 Corr.	98800	5970	67062.5	1.49115e-05	67062.5					0.083								25.5797		1.09734
https://doi.org/10.1111/jmg.12534	[0018]	ZN26D2	ZN26D2_127_1-5	OROGEN	India	Gianbul dome / Zanskar crystalline complex / NW Himalayan Orogen	Metapelite	Amphibolite	Garnet-Staurolite Schist		Metamorphic	LAICPMS									207 Corr.	24800	5060	17100	5.84795e-05	17100					0.0534								29.909		0.660084
https://doi.org/10.1111/jmg.12534	[0018]	ZN26D3	ZN26D3_137_1-12	OROGEN	India	Gianbul dome / Zanskar crystalline complex / NW Himalayan Orogen	Metapelite	Amphibolite	Garnet-Staurolite Schist		Metamorphic	LAICPMS									207 Corr.	20800	5850	12356.2	8.09307e-05	12356.3					0.0549								29.864		0.658191
https://doi.org/10.1111/jmg.12534	[0018]	ZN26D2	ZN26D2_128_1-2	OROGEN	India	Gianbul dome / Zanskar crystalline complex / NW Himalayan Orogen	Metapelite	Amphibolite	Garnet-Staurolite Schist		Metamorphic	LAICPMS									207 Corr.	24000	6200	16781.2	5.95903e-05	16781.2					0.0806								29.5941		0.835185
https://doi.org/10.1111/jmg.12534	[0018]	ZN26D2	ZN26D2_131_4-2	OROGEN	India	Gianbul dome / Zanskar crystalline complex / NW Himalayan Orogen	Metapelite	Amphibolite	Garnet-Staurolite Schist		Metamorphic	LAICPMS									207 Corr.	97300	4500	58187.5	1.71858e-05	58187.5					0.0574								29.4892		0.726371
https://doi.org/10.1111/jmg.12534	[0018]	ZN26D2	ZN26D2_131_5-2	OROGEN	India	Gianbul dome / Zanskar crystalline complex / NW Himalayan Orogen	Metapelite	Amphibolite	Garnet-Staurolite Schist		Metamorphic	LAICPMS									207 Corr.	116400	4840	47000	2.12766e-05	47000					0.1212								29.3761		0.783212
https://doi.org/10.1111/jmg.12534	[0018]	ZN26D3	ZN26D3_137_1-9	OROGEN	India	Gianbul dome / Zanskar crystalline complex / NW Himalayan Orogen	Metapelite	Amphibolite	Garnet-Staurolite Schist		Metamorphic	LAICPMS									207 Corr.	20800	9220	11768.8	8.49708e-05	11768.8					0.0498								29.3439		0.720548
https://doi.org/10.1111/jmg.12534	[0018]	ZN26D3	ZN26D3_137_1-3	OROGEN	India	Gianbul dome / Zanskar crystalline complex / NW Himalayan Orogen	Metapelite	Amphibolite	Garnet-Staurolite Schist		Metamorphic	LAICPMS									207 Corr.	27100	7080	14056.2	7.11427e-05	14056.3					0.0532								29.3118		0.657906
https://doi.org/10.1111/jmg.12534	[0018]	ZN26D2	ZN26D2_127_1-4	OROGEN	India	Gianbul dome / Zanskar crystalline complex / NW Himalayan Orogen	Metapelite	Amphibolite	Garnet-Staurolite Schist		Metamorphic	LAICPMS									207 Corr.	27000	5070	18943.8	5.27879e-05	18943.8					0.0504								29.2064		0.676954
https://doi.org/10.1111/jmg.12534	[0018]	ZN26D3	ZN26D3_137_1-11	OROGEN	India	Gianbul dome / Zanskar crystalline complex / NW Himalayan Orogen	Metapelite	Amphibolite	Garnet-Staurolite Schist		Metamorphic	LAICPMS									207 Corr.	25500	7010	14793.8	6.75961e-05	14793.8					0.0496								29.0891		0.627804
https://doi.org/10.1111/jmg.12534	[0018]	ZN26D3	ZN26D3_138_1-11	OROGEN	India	Gianbul dome / Zanskar crystalline complex / NW Himalayan Orogen	Metapelite	Amphibolite	Garnet-Staurolite Schist		Metamorphic	LAICPMS									207 Corr.	51100	7100	26937.5	3.7123e-05	26937.5					0.053								29.0709		0.646542
https://doi.org/10.1111/jmg.12534	[0018]	ZN26D2	ZN26D2_132_5-3	OROGEN	India	Gianbul dome / Zanskar crystalline complex / NW Himalayan Orogen	Metapelite	Amphibolite	Garnet-Staurolite Schist		Metamorphic	LAICPMS									207 Corr.	29500	4760	19693.8	5.07775e-05	19693.8					0.0523								29.046		0.663503
https://doi.org/10.1111/jmg.12534	[0018]	ZN26D2	ZN26D2_128_1-4	OROGEN	India	Gianbul dome / Zanskar crystalline complex / NW Himalayan Orogen	Metapelite	Amphibolite	Garnet-Staurolite Schist		Metamorphic	LAICPMS									207 Corr.	37400	7930	25000	4e-05	25000					0.0508								29.0445		0.65603
https://doi.org/10.1111/jmg.12534	[0018]	ZN26D3	ZN26D3_138_1-4	OROGEN	India	Gianbul dome / Zanskar crystalline complex / NW Himalayan Orogen	Metapelite	Amphibolite	Garnet-Staurolite Schist		Metamorphic	LAICPMS									207 Corr.	33500	5560	18793.8	5.32092e-05	18793.8					0.0698								29.0416		0.717883
https://doi.org/10.1111/jmg.12534	[0018]	ZN26D2	ZN26D2_127_1-6	OROGEN	India	Gianbul dome / Zanskar crystalline complex / NW Himalayan Orogen	Metapelite	Amphibolite	Garnet-Staurolite Schist		Metamorphic	LAICPMS									207 Corr.	25900	5120	18875	5.29801e-05	18875					0.0517								29.0301		0.692956
https://doi.org/10.1111/jmg.12534	[0018]	ZN26D4	ZN26D4_119_2-1	OROGEN	India	Gianbul dome / Zanskar crystalline complex / NW Himalayan Orogen	Metapelite	Amphibolite	Garnet-Staurolite Schist		Metamorphic	LAICPMS									207 Corr.	90900	5550	49000	2.04082e-05	49000					0.061								29.0242		0.702847
https://doi.org/10.1111/jmg.12534	[0018]	ZN26D4	ZN26D4_119_2-2	OROGEN	India	Gianbul dome / Zanskar crystalline complex / NW Himalayan Orogen	Metapelite	Amphibolite	Garnet-Staurolite Schist		Metamorphic	LAICPMS									207 Corr.	79800	5230	44375	2.25352e-05	44375					0.0607								28.9787		0.638315
https://doi.org/10.1111/jmg.12534	[0018]	ZN26D4	ZN26D4_117_5-5	OROGEN	India	Gianbul dome / Zanskar crystalline complex / NW Himalayan Orogen	Metapelite	Amphibolite	Garnet-Staurolite Schist		Metamorphic	LAICPMS									207 Corr.	37700	6940	20000	5e-05	20000					0.0525								28.9302		0.744585
https://doi.org/10.1111/jmg.12534	[0018]	ZN26D2	ZN26D2_128_1-1	OROGEN	India	Gianbul dome / Zanskar crystalline complex / NW Himalayan Orogen	Metapelite	Amphibolite	Garnet-Staurolite Schist		Metamorphic	LAICPMS									207 Corr.	31000	6350	21206.2	4.71559e-05	21206.2					0.074								28.9247		1.20505
https://doi.org/10.1111/jmg.12534	[0018]	ZN26D2	ZN26D2_128_1-7	OROGEN	India	Gianbul dome / Zanskar crystalline complex / NW Himalayan Orogen	Metapelite	Amphibolite	Garnet-Staurolite Schist		Metamorphic	LAICPMS									207 Corr.	34400	6470	23375	4.27807e-05	23375					0.0508								28.9231		0.667614
https://doi.org/10.1111/jmg.12534	[0018]	ZN26D2	ZN26D2_132_5-2	OROGEN	India	Gianbul dome / Zanskar crystalline complex / NW Himalayan Orogen	Metapelite	Amphibolite	Garnet-Staurolite Schist		Metamorphic	LAICPMS									207 Corr.	40700	5090	25562.5	3.91198e-05	25562.5					0.0535								28.9058		0.633525
https://doi.org/10.1111/jmg.12534	[0018]	ZN26D4	ZN26D4_123_1-1	OROGEN	India	Gianbul dome / Zanskar crystalline complex / NW Himalayan Orogen	Metapelite	Amphibolite	Garnet-Staurolite Schist		Metamorphic	LAICPMS									207 Corr.	31900	8360	17968.8	5.56522e-05	17968.8					0.0571								28.867		0.62711
https://doi.org/10.1111/jmg.12534	[0018]	ZN26D4	ZN26D4_117_4-1	OROGEN	India	Gianbul dome / Zanskar crystalline complex / NW Himalayan Orogen	Metapelite	Amphibolite	Garnet-Staurolite Schist		Metamorphic	LAICPMS									207 Corr.	29900	5840	16475	6.0698e-05	16475					0.0533								28.8623		0.678532
https://doi.org/10.1111/jmg.12534	[0018]	ZN26D2	ZN26D2_127_1-1	OROGEN	India	Gianbul dome / Zanskar crystalline complex / NW Himalayan Orogen	Metapelite	Amphibolite	Garnet-Staurolite Schist		Metamorphic	LAICPMS									207 Corr.	30500	5930	18587.5	5.37996e-05	18587.5					0.0536								28.8321		0.672398
https://doi.org/10.1111/jmg.12534	[0018]	ZN26D3	ZN26D3_137_1-8	OROGEN	India	Gianbul dome / Zanskar crystalline complex / NW Himalayan Orogen	Metapelite	Amphibolite	Garnet-Staurolite Schist		Metamorphic	LAICPMS									207 Corr.	24200	7990	14093.8	7.09534e-05	14093.8					0.0521								28.8239		0.740751
https://doi.org/10.1111/jmg.12534	[0018]	ZN26D2	ZN26D2_131_1-4	OROGEN	India	Gianbul dome / Zanskar crystalline complex / NW Himalayan Orogen	Metapelite	Amphibolite	Garnet-Staurolite Schist		Metamorphic	LAICPMS									207 Corr.	82000	4260	49875	2.00501e-05	49875					0.0636								28.7943		0.661926
https://doi.org/10.1111/jmg.12534	[0018]	ZN26D3	ZN26D3_138_1-5	OROGEN	India	Gianbul dome / Zanskar crystalline complex / NW Himalayan Orogen	Metapelite	Amphibolite	Garnet-Staurolite Schist		Metamorphic	LAICPMS									207 Corr.	43800	6770	23931.2	4.17864e-05	23931.2					0.0545								28.786		0.691671
https://doi.org/10.1111/jmg.12534	[0018]	ZN26D2	ZN26D2_132_4-2	OROGEN	India	Gianbul dome / Zanskar crystalline complex / NW Himalayan Orogen	Metapelite	Amphibolite	Garnet-Staurolite Schist		Metamorphic	LAICPMS									207 Corr.	27600	4580	19281.2	5.18639e-05	19281.2					0.0921								28.7717		0.737749
https://doi.org/10.1111/jmg.12534	[0018]	ZN26D4	ZN26D4_117_2-2	OROGEN	India	Gianbul dome / Zanskar crystalline complex / NW Himalayan Orogen	Metapelite	Amphibolite	Garnet-Staurolite Schist		Metamorphic	LAICPMS									207 Corr.	26900	8210	15487.5	6.45682e-05	15487.5					0.0531								28.7232		0.646399
https://doi.org/10.1111/jmg.12534	[0018]	ZN26D2	ZN26D2_127_1-3	OROGEN	India	Gianbul dome / Zanskar crystalline complex / NW Himalayan Orogen	Metapelite	Amphibolite	Garnet-Staurolite Schist		Metamorphic	LAICPMS									207 Corr.	29100	5560	17850	5.60224e-05	17850					0.0527								28.6679		0.59543
https://doi.org/10.1111/jmg.12534	[0018]	ZN26D3	ZN26D3_137_1-4	OROGEN	India	Gianbul dome / Zanskar crystalline complex / NW Himalayan Orogen	Metapelite	Amphibolite	Garnet-Staurolite Schist		Metamorphic	LAICPMS									207 Corr.	33300	9260	20000	5e-05	20000					0.0482								28.6606		0.69079
https://doi.org/10.1111/jmg.12534	[0018]	ZN26D4	ZN26D4_117_4-3	OROGEN	India	Gianbul dome / Zanskar crystalline complex / NW Himalayan Orogen	Metapelite	Amphibolite	Garnet-Staurolite Schist		Metamorphic	LAICPMS									207 Corr.	24200	5640	13712.5	7.29262e-05	13712.5					0.0517								28.5963		0.743351
https://doi.org/10.1111/jmg.12534	[0018]	ZN26D3	ZN26D3_138_1-1	OROGEN	India	Gianbul dome / Zanskar crystalline complex / NW Himalayan Orogen	Metapelite	Amphibolite	Garnet-Staurolite Schist		Metamorphic	LAICPMS									207 Corr.	58000	5960	32875	3.04183e-05	32875					0.055								28.5959		0.676335
https://doi.org/10.1111/jmg.12534	[0018]	ZN26D3	ZN26D3_137_1-5	OROGEN	India	Gianbul dome / Zanskar crystalline complex / NW Himalayan Orogen	Metapelite	Amphibolite	Garnet-Staurolite Schist		Metamorphic	LAICPMS									207 Corr.	37000	9380	21218.8	4.71281e-05	21218.8					0.0608								28.5588		0.616351
https://doi.org/10.1111/jmg.12534	[0018]	ZN26D4	ZN26D4_118_2-4	OROGEN	India	Gianbul dome / Zanskar crystalline complex / NW Himalayan Orogen	Metapelite	Amphibolite	Garnet-Staurolite Schist		Metamorphic	LAICPMS									207 Corr.	30200	7320	17237.5	5.80131e-05	17237.5					0.052								28.5406		0.766616
https://doi.org/10.1111/jmg.12534	[0018]	ZN26D2	ZN26D2_131_1-3	OROGEN	India	Gianbul dome / Zanskar crystalline complex / NW Himalayan Orogen	Metapelite	Amphibolite	Garnet-Staurolite Schist		Metamorphic	LAICPMS									207 Corr.	86400	4620	53656.2	1.86372e-05	53656.2					0.0594								28.5222		0.686121
https://doi.org/10.1111/jmg.12534	[0018]	ZN26D3	ZN26D3_138_1-2	OROGEN	India	Gianbul dome / Zanskar crystalline complex / NW Himalayan Orogen	Metapelite	Amphibolite	Garnet-Staurolite Schist		Metamorphic	LAICPMS									207 Corr.	69300	6130	38250	2.61438e-05	38250					0.0599								28.5164		0.703047
https://doi.org/10.1111/jmg.12534	[0018]	ZN26D4	ZN26D4_118_2-2	OROGEN	India	Gianbul dome / Zanskar crystalline complex / NW Himalayan Orogen	Metapelite	Amphibolite	Garnet-Staurolite Schist		Metamorphic	LAICPMS									207 Corr.	37800	8150	20931.2	4.77755e-05	20931.2					0.0506								28.5152		0.653917
https://doi.org/10.1111/jmg.12534	[0018]	ZN26D4	ZN26D4_118_4-2	OROGEN	India	Gianbul dome / Zanskar crystalline complex / NW Himalayan Orogen	Metapelite	Amphibolite	Garnet-Staurolite Schist		Metamorphic	LAICPMS									207 Corr.	39800	8320	21893.8	4.56751e-05	21893.8					0.0522								28.4886		0.62587
https://doi.org/10.1111/jmg.12534	[0018]	ZN26D2	ZN26D2_132_5-1	OROGEN	India	Gianbul dome / Zanskar crystalline complex / NW Himalayan Orogen	Metapelite	Amphibolite	Garnet-Staurolite Schist		Metamorphic	LAICPMS									207 Corr.	36200	5330	23625	4.2328e-05	23625					0.0538								28.4747		0.684474
https://doi.org/10.1111/jmg.12534	[0018]	ZN26D2	ZN26D2_131_2-1	OROGEN	India	Gianbul dome / Zanskar crystalline complex / NW Himalayan Orogen	Metapelite	Amphibolite	Garnet-Staurolite Schist		Metamorphic	LAICPMS									207 Corr.	79300	4600	51562.5	1.93939e-05	51562.5					0.0746								28.4621		0.703464
https://doi.org/10.1111/jmg.12534	[0018]	ZN26D2	ZN26D2_132_3-1	OROGEN	India	Gianbul dome / Zanskar crystalline complex / NW Himalayan Orogen	Metapelite	Amphibolite	Garnet-Staurolite Schist		Metamorphic	LAICPMS									207 Corr.	31800	6130	19693.8	5.07775e-05	19693.8					0.058								28.4601		0.707468
https://doi.org/10.1111/jmg.12534	[0018]	ZN26D3	ZN26D3_138_1-7	OROGEN	India	Gianbul dome / Zanskar crystalline complex / NW Himalayan Orogen	Metapelite	Amphibolite	Garnet-Staurolite Schist		Metamorphic	LAICPMS									207 Corr.	55200	6450	28687.5	3.48584e-05	28687.5					0.0536								28.4183		0.711127
https://doi.org/10.1111/jmg.12534	[0018]	ZN26D3	ZN26D3_137_1-2	OROGEN	India	Gianbul dome / Zanskar crystalline complex / NW Himalayan Orogen	Metapelite	Amphibolite	Garnet-Staurolite Schist		Metamorphic	LAICPMS									207 Corr.	28400	7190	15343.8	6.51731e-05	15343.8					0.0526								28.3848		0.599686
https://doi.org/10.1111/jmg.12534	[0018]	ZN26D3	ZN26D3_138_1-12	OROGEN	India	Gianbul dome / Zanskar crystalline complex / NW Himalayan Orogen	Metapelite	Amphibolite	Garnet-Staurolite Schist		Metamorphic	LAICPMS									207 Corr.	47000	6750	25656.2	3.89769e-05	25656.2					0.053								28.3638		0.764761
https://doi.org/10.1111/jmg.12534	[0018]	ZN26D3	ZN26D3_138_1-9	OROGEN	India	Gianbul dome / Zanskar crystalline complex / NW Himalayan Orogen	Metapelite	Amphibolite	Garnet-Staurolite Schist		Metamorphic	LAICPMS									207 Corr.	57800	6120	33750	2.96296e-05	33750					0.057								28.3131		0.642364
https://doi.org/10.1111/jmg.12534	[0018]	ZN26D3	ZN26D3_137_1-10	OROGEN	India	Gianbul dome / Zanskar crystalline complex / NW Himalayan Orogen	Metapelite	Amphibolite	Garnet-Staurolite Schist		Metamorphic	LAICPMS									207 Corr.	24990	6280	14762.5	6.77392e-05	14762.5					0.0522								28.2973		0.6354
https://doi.org/10.1111/jmg.12534	[0018]	ZN26D4	ZN26D4_118_4-3	OROGEN	India	Gianbul dome / Zanskar crystalline complex / NW Himalayan Orogen	Metapelite	Amphibolite	Garnet-Staurolite Schist		Metamorphic	LAICPMS									207 Corr.	42100	6580	21918.8	4.5623e-05	21918.8					0.0553								28.2927		0.677768
https://doi.org/10.1111/jmg.12534	[0018]	ZN26D3	ZN26D3_138_1-6	OROGEN	India	Gianbul dome / Zanskar crystalline complex / NW Himalayan Orogen	Metapelite	Amphibolite	Garnet-Staurolite Schist		Metamorphic	LAICPMS									207 Corr.	45100	6500	24375	4.10256e-05	24375					0.0545								28.2837		0.668154
https://doi.org/10.1111/jmg.12534	[0018]	ZN26D3	ZN26D3_137_1-1	OROGEN	India	Gianbul dome / Zanskar crystalline complex / NW Himalayan Orogen	Metapelite	Amphibolite	Garnet-Staurolite Schist		Metamorphic	LAICPMS									207 Corr.	23400	7300	13631.2	7.33608e-05	13631.2					0.0693								28.2686		0.732695
https://doi.org/10.1111/jmg.12534	[0018]	ZN26D2	ZN26D2_132_4-3	OROGEN	India	Gianbul dome / Zanskar crystalline complex / NW Himalayan Orogen	Metapelite	Amphibolite	Garnet-Staurolite Schist		Metamorphic	LAICPMS									207 Corr.	29000	6190	18287.5	5.46822e-05	18287.5					0.0519								28.2444		0.600248
https://doi.org/10.1111/jmg.12534	[0018]	ZN26D4	ZN26D4_118_2-3	OROGEN	India	Gianbul dome / Zanskar crystalline complex / NW Himalayan Orogen	Metapelite	Amphibolite	Garnet-Staurolite Schist		Metamorphic	LAICPMS									207 Corr.	35800	8030	20406.2	4.90046e-05	20406.2					0.0513								28.2407		0.625646
https://doi.org/10.1111/jmg.12534	[0018]	ZN26D2	ZN26D2_132_3-3	OROGEN	India	Gianbul dome / Zanskar crystalline complex / NW Himalayan Orogen	Metapelite	Amphibolite	Garnet-Staurolite Schist		Metamorphic	LAICPMS									207 Corr.	26600	5330	17481.2	5.72041e-05	17481.2					0.0506								28.2404		0.635476
https://doi.org/10.1111/jmg.12534	[0018]	ZN26D4	ZN26D4_118_4-5	OROGEN	India	Gianbul dome / Zanskar crystalline complex / NW Himalayan Orogen	Metapelite	Amphibolite	Garnet-Staurolite Schist		Metamorphic	LAICPMS									207 Corr.	39300	7600	18500	5.40541e-05	18500					0.0678								28.2305		0.649799
https://doi.org/10.1111/jmg.12534	[0018]	ZN26D2	ZN26D2_128_1-5	OROGEN	India	Gianbul dome / Zanskar crystalline complex / NW Himalayan Orogen	Metapelite	Amphibolite	Garnet-Staurolite Schist		Metamorphic	LAICPMS									207 Corr.	37200	7610	23437.5	4.26667e-05	23437.5					0.0522								28.2017		0.638277
https://doi.org/10.1111/jmg.12534	[0018]	ZN26D4	ZN26D4_123_1-3	OROGEN	India	Gianbul dome / Zanskar crystalline complex / NW Himalayan Orogen	Metapelite	Amphibolite	Garnet-Staurolite Schist		Metamorphic	LAICPMS									207 Corr.	33400	10400	18225	5.48697e-05	18225					0.0657								28.1516		0.642351
https://doi.org/10.1111/jmg.12534	[0018]	ZN26D4	ZN26D4_118_4-4	OROGEN	India	Gianbul dome / Zanskar crystalline complex / NW Himalayan Orogen	Metapelite	Amphibolite	Garnet-Staurolite Schist		Metamorphic	LAICPMS									207 Corr.	42400	7540	24543.8	4.07436e-05	24543.8					0.0524								28.1243		0.616412
https://doi.org/10.1111/jmg.12534	[0018]	ZN26D3	ZN26D3_138_1-8	OROGEN	India	Gianbul dome / Zanskar crystalline complex / NW Himalayan Orogen	Metapelite	Amphibolite	Garnet-Staurolite Schist		Metamorphic	LAICPMS									207 Corr.	62600	6740	33562.5	2.97952e-05	33562.5					0.0576								28.1202		0.623157
https://doi.org/10.1111/jmg.12534	[0018]	ZN26D2	ZN26D2_132_3-2	OROGEN	India	Gianbul dome / Zanskar crystalline complex / NW Himalayan Orogen	Metapelite	Amphibolite	Garnet-Staurolite Schist		Metamorphic	LAICPMS									207 Corr.	25300	5270	16306.2	6.13262e-05	16306.2					0.0547								28.1112		0.644352
https://doi.org/10.1111/jmg.12534	[0018]	ZN26D4	ZN26D4_117_4-4	OROGEN	India	Gianbul dome / Zanskar crystalline complex / NW Himalayan Orogen	Metapelite	Amphibolite	Garnet-Staurolite Schist		Metamorphic	LAICPMS									207 Corr.	35800	7630	16431.2	6.08596e-05	16431.2					0.0641								28.1099		0.896221
https://doi.org/10.1111/jmg.12534	[0018]	ZN26D2	ZN26D2_127_1-7	OROGEN	India	Gianbul dome / Zanskar crystalline complex / NW Himalayan Orogen	Metapelite	Amphibolite	Garnet-Staurolite Schist		Metamorphic	LAICPMS									207 Corr.	23600	5750	15831.2	6.31662e-05	15831.2					0.0542								28.1038		0.614376
https://doi.org/10.1111/jmg.12534	[0018]	ZN26D4	ZN26D4_117_5-3	OROGEN	India	Gianbul dome / Zanskar crystalline complex / NW Himalayan Orogen	Metapelite	Amphibolite	Garnet-Staurolite Schist		Metamorphic	LAICPMS									207 Corr.	36700	7800	19362.5	5.16462e-05	19362.5					0.0612								28.0523		0.752142
https://doi.org/10.1111/jmg.12534	[0018]	ZN26D2	ZN26D2_131_5-1	OROGEN	India	Gianbul dome / Zanskar crystalline complex / NW Himalayan Orogen	Metapelite	Amphibolite	Garnet-Staurolite Schist		Metamorphic	LAICPMS									207 Corr.	90400	4790	53375	1.87354e-05	53375					0.0849								28.0502		0.717189
https://doi.org/10.1111/jmg.12534	[0018]	ZN26D2	ZN26D2_127_1-2	OROGEN	India	Gianbul dome / Zanskar crystalline complex / NW Himalayan Orogen	Metapelite	Amphibolite	Garnet-Staurolite Schist		Metamorphic	LAICPMS									207 Corr.	24800	5510	15612.5	6.40512e-05	15612.5					0.0522								28.0295		0.642493
https://doi.org/10.1111/jmg.12534	[0018]	ZN26D4	ZN26D4_117_5-4	OROGEN	India	Gianbul dome / Zanskar crystalline complex / NW Himalayan Orogen	Metapelite	Amphibolite	Garnet-Staurolite Schist		Metamorphic	LAICPMS									207 Corr.	52700	8510	25443.8	3.93024e-05	25443.8					0.057								27.8441		0.626555
https://doi.org/10.1111/jmg.12534	[0018]	ZN26D4	ZN26D4_117_5-6	OROGEN	India	Gianbul dome / Zanskar crystalline complex / NW Himalayan Orogen	Metapelite	Amphibolite	Garnet-Staurolite Schist		Metamorphic	LAICPMS									207 Corr.	37900	8730	19487.5	5.13149e-05	19487.5					0.0562								27.8094		0.740124
https://doi.org/10.1111/jmg.12534	[0018]	ZN26D3	ZN26D3_137_1-6	OROGEN	India	Gianbul dome / Zanskar crystalline complex / NW Himalayan Orogen	Metapelite	Amphibolite	Garnet-Staurolite Schist		Metamorphic	LAICPMS									207 Corr.	18400	8000	8650	0.000115607	8650					0.081								27.7362		1.08876
https://doi.org/10.1111/jmg.12534	[0018]	ZN26D4	ZN26D4_117_5-2	OROGEN	India	Gianbul dome / Zanskar crystalline complex / NW Himalayan Orogen	Metapelite	Amphibolite	Garnet-Staurolite Schist		Metamorphic	LAICPMS									207 Corr.	31500	7460	17387.5	5.75126e-05	17387.5					0.0559								27.7187		0.614096
https://doi.org/10.1111/jmg.12534	[0018]	ZN26D2	ZN26D2_128_1-6	OROGEN	India	Gianbul dome / Zanskar crystalline complex / NW Himalayan Orogen	Metapelite	Amphibolite	Garnet-Staurolite Schist		Metamorphic	LAICPMS									207 Corr.	29400	7210	20500	4.87805e-05	20500					0.0509								27.6803		0.565266
https://doi.org/10.1111/jmg.12534	[0018]	ZN26D2	ZN26D2_132_4-1	OROGEN	India	Gianbul dome / Zanskar crystalline complex / NW Himalayan Orogen	Metapelite	Amphibolite	Garnet-Staurolite Schist		Metamorphic	LAICPMS									207 Corr.	32000	4440	19775	5.05689e-05	19775					0.146								27.6208		0.729322
https://doi.org/10.1111/jmg.12534	[0018]	ZN26D4	ZN26D4_118_4-1	OROGEN	India	Gianbul dome / Zanskar crystalline complex / NW Himalayan Orogen	Metapelite	Amphibolite	Garnet-Staurolite Schist		Metamorphic	LAICPMS									207 Corr.	42900	8770	22806.2	4.38476e-05	22806.2					0.0536								27.4126		0.591674
[truncated: 98,711 more rows]
[truncated: 15 more columns]

## Sheet: G49416
Mulder, J.A., and Cawood, P.A., 2021, Evaluating preservation bias in the continental growth record against the monazite archive: Geology, https://doi.org/10.1130/G49416.1
